# Supplementary material
Source: Research Square preprint supplement (doi:10.21203/rs.3.rs-9933134/v1)
Supplement: Supplementary file 1 [file 2db095979590dad7cea7be9c.xlsx]

## Sheet: GDP
Data Source	World Development Indicators
Last Updated Date	2025-12-19
Country Name	Country Code	Indicator Name	Indicator Code	1960	1961	1962	1963	1964	1965	1966	1967	1968	1969	1970	1971	1972	1973	1974	1975	1976	1977	1978	1979	1980	1981	1982	1983	1984	1985	1986	1987	1988	1989	1990	1991	1992	1993	1994	1995	1996	1997	1998	1999	2000	2001	2002	2003	2004	2005
Aruba	ABW	GDP (current US$)	NY.GDP.MKTP.CD																											4.05587e+08	4.87709e+08	5.96648e+08	6.95531e+08	7.64804e+08	8.72067e+08	9.58659e+08	1.08324e+09	1.24581e+09	1.32067e+09	1.37989e+09	1.53184e+09	1.66536e+09	1.72291e+09	1.87345e+09	1.89646e+09	1.96184e+09	2.04411e+09	2.25483e+09	2.36002e+09
Africa Eastern and Southern	AFE	GDP (current US$)	NY.GDP.MKTP.CD	2.42057e+10	2.49589e+10	2.70732e+10	3.17691e+10	3.02796e+10	3.38062e+10	3.69272e+10	3.84442e+10	4.1742e+10	4.70485e+10	4.75939e+10	5.21887e+10	5.67261e+10	7.30836e+10	8.9536e+10	9.52958e+10	9.60064e+10	1.09208e+11	1.24083e+11	1.421e+11	1.78472e+11	1.85109e+11	1.78356e+11	1.85756e+11	1.70039e+11	1.49335e+11	1.60554e+11	1.90175e+11	2.07369e+11	2.20613e+11	2.56383e+11	2.76919e+11	2.41188e+11	2.39981e+11	2.43478e+11	2.73327e+11	2.73428e+11	2.88271e+11	2.68728e+11	2.65321e+11	2.87042e+11	2.6085e+11	2.69746e+11	3.58116e+11	4.45975e+11	5.21562e+11
Afghanistan	AFG	GDP (current US$)	NY.GDP.MKTP.CD																																									3.52142e+09	2.81357e+09	3.8257e+09	4.52095e+09	5.2249e+09	6.20326e+09
Africa Western and Central	AFW	GDP (current US$)	NY.GDP.MKTP.CD	1.19048e+10	1.27077e+10	1.36306e+10	1.44689e+10	1.58036e+10	1.69209e+10	1.80339e+10	1.64935e+10	1.70226e+10	1.93012e+10	2.66969e+10	2.44968e+10	2.94894e+10	3.68906e+10	4.96872e+10	5.72801e+10	6.83856e+10	7.17895e+10	7.87781e+10	9.66811e+10	1.21446e+11	2.17607e+11	1.96265e+11	1.51421e+11	1.31373e+11	1.38005e+11	1.09518e+11	1.12641e+11	1.1177e+11	1.04577e+11	1.24278e+11	1.30794e+11	1.25449e+11	1.30547e+11	1.35351e+11	2.07844e+11	2.63564e+11	2.7646e+11	2.97127e+11	1.40119e+11	1.427e+11	1.50714e+11	1.80129e+11	2.08647e+11	2.57939e+11	3.16516e+11
Angola	AGO	GDP (current US$)	NY.GDP.MKTP.CD																					5.9305e+09	5.55048e+09	5.55048e+09	5.78434e+09	6.13148e+09	7.55407e+09	7.07254e+09	8.08441e+09	8.76984e+09	1.02018e+10	1.12295e+10	1.06038e+10	8.30781e+09	5.76872e+09	4.43832e+09	5.53875e+09	7.52642e+09	7.64838e+09	6.50622e+09	6.15292e+09	9.12959e+09	8.93608e+09	1.73115e+10	2.03421e+10	2.6998e+10	4.13966e+10
Albania	ALB	GDP (current US$)	NY.GDP.MKTP.CD																					1.5781e+09	1.80818e+09	1.86116e+09	1.88141e+09	1.85734e+09	1.89705e+09	2097326250	2080796250	2051236250	2253090000	2028553750	1.09956e+09	6.52175e+08	1.18532e+09	1.88095e+09	2.90509e+09	3.23449e+09	2.29367e+09	2.60036e+09	3.28394e+09	3.58457e+09	4.05906e+09	4.515e+09	5.80171e+09	7.40665e+09	8.25666e+09
Andorra	AND	GDP (current US$)	NY.GDP.MKTP.CD											7.86177e+07	8.94066e+07	1.13414e+08	1.50842e+08	1.86557e+08	2.20113e+08	2.27284e+08	2.53998e+08	3.0802e+08	4.11549e+08	4.46378e+08	3.88983e+08	3.75915e+08	3.2785e+08	3.30073e+08	3.46743e+08	4.81996e+08	6.113e+08	7.21426e+08	7.9549e+08	1.02899e+09	1.10689e+09	1.20999e+09	1.00709e+09	1.01754e+09	1.17875e+09	1.22402e+09	1.18065e+09	1.21195e+09	1.2403e+09	1.43261e+09	1.54827e+09	1.76428e+09	2.36694e+09	2.90024e+09	3.16108e+09
Arab World	ARB	GDP (current US$)	NY.GDP.MKTP.CD		1.99984e+10	2.0329e+10	2.23645e+10	2.48133e+10	2.67711e+10	2.8351e+10	3.06009e+10	3.4973e+10	3.85636e+10	4.30941e+10	4.99302e+10	5.99707e+10	7.91307e+10	1.52199e+11	1.6817e+11	2.10008e+11	2.42287e+11	2.65416e+11	3.58136e+11	4.86439e+11	4.94934e+11	4.631e+11	4.37477e+11	4.40187e+11	4.32864e+11	4.05452e+11	4.31233e+11	4.29363e+11	4.57356e+11	6.41684e+11	4.67929e+11	4.67773e+11	4.78902e+11	4.99876e+11	5.28475e+11	5.70906e+11	6.14595e+11	5.98783e+11	6.65405e+11	7.634e+11	7.44723e+11	7.46651e+11	8.30076e+11	9.87305e+11	1.21008e+12
United Arab Emirates	ARE	GDP (current US$)	NY.GDP.MKTP.CD											6.85987e+08	9.39894e+08	1.41509e+09	4.23124e+09	1.16515e+10	1.47207e+10	1.92132e+10	2.48718e+10	2.37758e+10	3.12257e+10	4.35992e+10	4.93334e+10	4.66227e+10	4.28033e+10	4.1808e+10	4.06037e+10	3.39436e+10	3.63849e+10	3.62757e+10	4.1465e+10	5.07014e+10	5.15522e+10	5.42392e+10	5.56252e+10	5.93051e+10	6.57437e+10	7.35712e+10	7.8839e+10	7.56743e+10	8.44455e+10	1.04337e+11	1.03312e+11	1.09816e+11	1.24346e+11	1.47824e+11	1.80617e+11
Argentina	ARG	GDP (current US$)	NY.GDP.MKTP.CD	1.58655e+10	2.01322e+10	1.83377e+10	1.82721e+10	2.56052e+10	2.83447e+10	2.86305e+10	2.42567e+10	2.64369e+10	3.12563e+10	3.15842e+10	3.32932e+10	3.4733e+10	5.2544e+10	7.24368e+10	5.24386e+10	5.11695e+10	5.6781e+10	8.90495e+10	6.92523e+10	7.69619e+10	7.86768e+10	8.43075e+10	1.03979e+11	1.16915e+11	8.81509e+10	1.05872e+11	1.08811e+11	1.2689e+11	7.66297e+10	1.41353e+11	1.8972e+11	2.28779e+11	2.36742e+11	257440000000	258031750000	272149750000	292859000000	298948250000	283523000000	284203750000	268696750000	9.7724e+10	1.27587e+11	1.64658e+11	1.98737e+11
Armenia	ARM	GDP (current US$)	NY.GDP.MKTP.CD																															2.25686e+09	2.06987e+09	1.27284e+09	1.20131e+09	1.31516e+09	1.46832e+09	1.59697e+09	1.63949e+09	1.89373e+09	1.84548e+09	1.91156e+09	2.11847e+09	2.37634e+09	2.80706e+09	3.57662e+09	4.90047e+09
American Samoa	ASM	GDP (current US$)	NY.GDP.MKTP.CD																																											512000000	524000000	509000000	500000000
Antigua and Barbuda	ATG	GDP (current US$)	NY.GDP.MKTP.CD																		7.75074e+07	8.80407e+07	1.09596e+08	1.32452e+08	1.49389e+08	1.66444e+08	1.84867e+08	2.12215e+08	2.4637e+08	2.97563e+08	3.46867e+08	4.11396e+08	4.55174e+08	4.78719e+08	5.04337e+08	5.25133e+08	5.65663e+08	6.25081e+08	6.16052e+08	6.79141e+08	7.34422e+08	7.89789e+08	8.35544e+08	9.01004e+08	8.77774e+08	8.98093e+08	948100000	1.02633e+09	1.1439e+09
Australia	AUS	GDP (current US$)	NY.GDP.MKTP.CD	1.86357e+10	1.97131e+10	1.99539e+10	2.15734e+10	2.38358e+10	2.60142e+10	2.73493e+10	3.04875e+10	3.27634e+10	3.67382e+10	4.13952e+10	4.52838e+10	5.2118e+10	6.39231e+10	8.90862e+10	9.74409e+10	1.05209e+11	1.10505e+11	1.18661e+11	1.35094e+11	1.50201e+11	1.77152e+11	1.94323e+11	1.77524e+11	1.9375e+11	1.80861e+11	1.82707e+11	1.89727e+11	2.36461e+11	3.00264e+11	3.11841e+11	3.26416e+11	3.25983e+11	3.12569e+11	3.23269e+11	3.68725e+11	4.01963e+11	4.36322e+11	4.00362e+11	3.90348e+11	4.16902e+11	3.8036e+11	3.96437e+11	4.68517e+11	6.15643e+11	6.96811e+11
Austria	AUT	GDP (current US$)	NY.GDP.MKTP.CD	6.62409e+09	7.34657e+09	7.79304e+09	8.41405e+09	9.21365e+09	1.00417e+10	1.09395e+10	1.16346e+10	1.24999e+10	1.36475e+10	1.53128e+10	1.77885e+10	2.19732e+10	2.93999e+10	3.50515e+10	3.99023e+10	4.27917e+10	5.13439e+10	6.18092e+10	7.36477e+10	8.17375e+10	7.0756e+10	7.09961e+10	7.18385e+10	6.77191e+10	6.9115e+10	9.86483e+10	1.23682e+11	1.32817e+11	1.32584e+11	1.65811e+11	1.73113e+11	1.94314e+11	1.89634e+11	2.02738e+11	2.40094e+11	2.35953e+11	2.11725e+11	2.17068e+11	2.16422e+11	1.96182e+11	1.96477e+11	2.12837e+11	2.6078e+11	2.9921e+11	3.13952e+11
Azerbaijan	AZE	GDP (current US$)	NY.GDP.MKTP.CD																															8.88485e+09	5344000000	4.44659e+08	1.57039e+09	1.19314e+09	2.41733e+09	3.17651e+09	3.96236e+09	4.44637e+09	4.58125e+09	5.27262e+09	5.70762e+09	6.23609e+09	7.27641e+09	8.68041e+09	1.32454e+10
Burundi	BDI	GDP (current US$)	NY.GDP.MKTP.CD	195999990	202999992	213500006	232749998	260750008	1.58995e+08	1.65445e+08	1.78297e+08	183200000	1.90206e+08	2.42733e+08	2.52842e+08	2.46805e+08	3.0434e+08	3.45263e+08	4.20987e+08	4.48413e+08	5.47536e+08	6.10226e+08	7.82497e+08	9.19727e+08	9.69047e+08	1.01322e+09	1.08293e+09	9.87144e+08	1.14998e+09	1.20173e+09	1.13147e+09	1.0824e+09	1.11392e+09	1.1321e+09	1.1674e+09	1.08304e+09	9.38633e+08	9.25031e+08	1.00043e+09	8.69034e+08	9.72896e+08	8.93771e+08	8.08077e+08	8.70486e+08	8.76795e+08	8.25395e+08	7.84654e+08	9.15257e+08	1.11711e+09
Belgium	BEL	GDP (current US$)	NY.GDP.MKTP.CD	1.18106e+10	1.25617e+10	1.34368e+10	1.44458e+10	1.6168e+10	1.75978e+10	1.88949e+10	2.02525e+10	2.16549e+10	2.40197e+10	2.67062e+10	2.98217e+10	3.72094e+10	4.77438e+10	5.60331e+10	6.56782e+10	7.11139e+10	8.28399e+10	1.01247e+11	1.16315e+11	1.26829e+11	1.0473e+11	9.20959e+10	8.71842e+10	8.33495e+10	8.62683e+10	1.20019e+11	1.49394e+11	1.62299e+11	1.64221e+11	2.05332e+11	2.10511e+11	2.34782e+11	2.24722e+11	2.44884e+11	2.88026e+11	2.79201e+11	2.52708e+11	2.58528e+11	2.58246e+11	2.36792e+11	2.36746e+11	2.58384e+11	3.18083e+11	3.69215e+11	3.85715e+11
Benin	BEN	GDP (current US$)	NY.GDP.MKTP.CD	2.26196e+08	2.35668e+08	2.36435e+08	2.53928e+08	2.69819e+08	2.89909e+08	3.02925e+08	3.06222e+08	3.26323e+08	3.30748e+08	3.33628e+08	3.35073e+08	4.10332e+08	5.04376e+08	5.54655e+08	6.7687e+08	6.98408e+08	7.5005e+08	9.28843e+08	1.18623e+09	1.40525e+09	1.29112e+09	1.26778e+09	1.09535e+09	1.05113e+09	1.04571e+09	1.3361e+09	1.56241e+09	1.62025e+09	1.50229e+09	1.95997e+09	1.98644e+09	1.69532e+09	2.27456e+09	1.59808e+09	2.16963e+09	2.36112e+09	2.2683e+09	2.45509e+09	3.67739e+09	3.51999e+09	3.66622e+09	4.19434e+09	5.34926e+09	6.19027e+09	6.56765e+09
Burkina Faso	BFA	GDP (current US$)	NY.GDP.MKTP.CD	3.30443e+08	3.50247e+08	3.79567e+08	3.94041e+08	4.10322e+08	4.22917e+08	4.3389e+08	4.50754e+08	4.60443e+08	4.78299e+08	4.58404e+08	4.82411e+08	5.78596e+08	6.74774e+08	7.51133e+08	9.39973e+08	9.76547e+08	1.13122e+09	1.47558e+09	1.74848e+09	1.92872e+09	1.77584e+09	1.75445e+09	1.60028e+09	1.45988e+09	1.55249e+09	2.0363e+09	2.36983e+09	2.61604e+09	2.61559e+09	3.1013e+09	3.13505e+09	3.35669e+09	3.19954e+09	1.89529e+09	2.37952e+09	2.58655e+09	2.44767e+09	2.8049e+09	3.38957e+09	2.96837e+09	3.19037e+09	3.62235e+09	4.74077e+09	5.45169e+09	6.14635e+09
Bangladesh	BGD	GDP (current US$)	NY.GDP.MKTP.CD	4.27489e+09	4817580375	5.08141e+09	5.31946e+09	5.38605e+09	5.90664e+09	6.43969e+09	7.25358e+09	7.48369e+09	8.47101e+09	8.99272e+09	8.75184e+09	6.28825e+09	8.08673e+09	1.25125e+10	1.94483e+10	1.01171e+10	9.65115e+09	1.32818e+10	1.55655e+10	1.8138e+10	2.02497e+10	1.85254e+10	1.7609e+10	18920840000	2.22784e+10	2.1774e+10	2.4298e+10	2.6579e+10	2.87817e+10	3.15983e+10	3.09575e+10	3.17089e+10	3.31665e+10	3.37687e+10	3.79397e+10	4.64385e+10	4.82443e+10	4.99846e+10	5.12706e+10	5.33698e+10	5.39913e+10	5.47241e+10	6.01589e+10	6.51085e+10	6.9476e+10
Bulgaria	BGR	GDP (current US$)	NY.GDP.MKTP.CD																					1.98392e+10	19870000000	19342000000	1.65637e+10	1.75949e+10	1.71554e+10	2.02493e+10	28101000000	2.25559e+10	2.19884e+10	2.06321e+10	7.62874e+09	8.60289e+09	1.08321e+10	9.70924e+09	1.89915e+10	1.2295e+10	1.13161e+10	1.50311e+10	1.36371e+10	1.3246e+10	1.41834e+10	1.6403e+10	2.1145e+10	2.61577e+10	2.98687e+10
Bahrain	BHR	GDP (current US$)	NY.GDP.MKTP.CD											3.91577e+08	4.22182e+08	5.34081e+08	7.61133e+08	1.04218e+09	1.09911e+09	1.58171e+09	1.98906e+09	2.27204e+09	2.71016e+09	3.49383e+09	3.94311e+09	4.14542e+09	4.24703e+09	4.44087e+09	4.15238e+09	3.47075e+09	3.85692e+09	4.20983e+09	4.39309e+09	4.80951e+09	5.24891e+09	5.40223e+09	5.913e+09	6.33063e+09	6.65118e+09	6.93817e+09	7.21941e+09	7.03131e+09	7.52847e+09	9.0629e+09	8.9762e+09	9.59351e+09	1.10748e+10	1.31502e+10	1.59687e+10
Bahamas, The	BHS	GDP (current US$)	NY.GDP.MKTP.CD	1.69736e+08	1.90022e+08	2.1217e+08	2.3765e+08	2.6656e+08	3.00272e+08	346800000	398000000	453800000	538700000	539500000	573400000	590900000	670900000	632400000	596200000	642100000	713000000	832400000	1139800100	1335300000	1426500000	1578300000	1732800000	2041100000	2320699900	2472500000	2713999900	2817900000	3062000000	3166000000	3111160000	3109000000	3092000000	3259000000	3429000000	3609000000	6332360000	6833220000	7683870000	8076470000	8317830000	8881160000	8870090000	9055290000	9836200000
Bosnia and Herzegovina	BIH	GDP (current US$)	NY.GDP.MKTP.CD																															7.75348e+09	6.12296e+09	4.73504e+09	3.63067e+09	1.2558e+09	1.86657e+09	2.78605e+09	3.67191e+09	4.11677e+09	4.68626e+09	5.56777e+09	5.80062e+09	6.72822e+09	8.49889e+09	1.01565e+10	1.12228e+10
Belarus	BLR	GDP (current US$)	NY.GDP.MKTP.CD																															1.73896e+10	1.84049e+10	1.69398e+10	1.62751e+10	1.49314e+10	1.39727e+10	1.45004e+10	1.41284e+10	1.5222e+10	1.21385e+10	1.27369e+10	1.23548e+10	1.45949e+10	1.78254e+10	2.31416e+10	3.02101e+10
Belize	BLZ	GDP (current US$)	NY.GDP.MKTP.CD	2.80725e+07	2.9965e+07	3.18576e+07	3.37501e+07	3.61946e+07	4.011e+07	4.445e+07	4.74313e+07	4.49999e+07	4.73999e+07	5.33399e+07	5.90747e+07	6.59981e+07	7.82148e+07	1.0316e+08	1.18194e+08	9.70942e+07	117650000	136300000	151800000	257400000	260750000	248550000	262150000	290350000	287300000	311500000	371100000	421450000	491100000	5.46751e+08	596682100	695741150	752255150	771838000	818590250	850339100	872916050	929047000	999713050	1138138100	1172045150	1243912050	1308280250	1400202000	1474298400
Bermuda	BMU	GDP (current US$)	NY.GDP.MKTP.CD	72400000	76500000	80700000	82600000	92200000	98000000	115000000	134800000	150000000	164900000	186300000	211100000	235400000	269500000	312600000	345000000	386300000	447000000	475800000	517200000	613299968	739100032	785500032	889400000	985699968	1039500032	1173500032	1296499968	1415100032	1501500032	1592400000	1634900000	1679900000	1820359900	1867160100	2030750000	2695390000	2932827000	3130748000	3324433000	3480219000	3680483000	3937228000	4186525000	4484703000	4868136000
Bolivia	BOL	GDP (current US$)	NY.GDP.MKTP.CD	3.7702e+08	4.10101e+08	4.48401e+08	4.82828e+08	5.44024e+08	6.04377e+08	6.69192e+08	7.55808e+08	8.57912e+08	9.2963e+08	1.017e+09	1.09562e+09	1.25762e+09	1.26297e+09	2.10025e+09	2.4047e+09	2.73198e+09	3.22744e+09	3.75822e+09	4.42134e+09	4.53748e+09	5.8916e+09	5.59413e+09	5.42266e+09	6.16948e+09	5.37728e+09	3.95938e+09	4.34796e+09	4.59761e+09	4.71597e+09	4.86758e+09	5.34326e+09	5.64387e+09	5.7347e+09	5.98122e+09	6.71516e+09	7.39695e+09	7.92574e+09	8.49749e+09	8.28506e+09	8.39786e+09	8.14152e+09	7.90549e+09	8.0824e+09	8.77345e+09	9.54912e+09
Brazil	BRA	GDP (current US$)	NY.GDP.MKTP.CD	1.70305e+10	1.72759e+10	1.92317e+10	2.32877e+10	2.09637e+10	2.24655e+10	2.82833e+10	3.10864e+10	3.39305e+10	3.71716e+10	4.23277e+10	4.88698e+10	5.84349e+10	8.35923e+10	1.09795e+11	1.29204e+11	1.53169e+11	1.76344e+11	2.00279e+11	2.21338e+11	2.37393e+11	2.58015e+11	2.71314e+11	1.89657e+11	1.8834e+11	2.1088e+11	2.56481e+11	2.83057e+11	3.07882e+11	4.12991e+11	3.90726e+11	3.42609e+11	3.28188e+11	3.68296e+11	5.2537e+11	7.69333e+11	8.50426e+11	8.83206e+11	8.63711e+11	5.99642e+11	6.55448e+11	5.59984e+11	5.09795e+11	5.58234e+11	6.69289e+11	8.91634e+11
Barbados	BRB	GDP (current US$)	NY.GDP.MKTP.CD	8.00218e+07	8.53638e+07	8.87826e+07	9.98938e+07	9.92527e+07	1.05022e+08	1.13195e+08	1.25554e+08	1.25734e+08	141393142	166210203	1.86827e+08	2.13725e+08	2.60768e+08	3.11805e+08	4.02179e+08	4.35911e+08	4.95098e+08	5.52884e+08	6.70362e+08	1.01228e+09	1.1142e+09	1.16392e+09	1.23602e+09	1.34689e+09	1.40954e+09	1.54776e+09	1.70437e+09	1.81276e+09	2.00617e+09	2.01213e+09	2.02058e+09	1957000000	2.06334e+09	2.15134e+09	2.21697e+09	2.36365e+09	2.49838e+09	2.81708e+09	2.95182e+09	3059500000	3054500000	3106500000	3209500000	3444500000	3819500000
Brunei Darussalam	BRN	GDP (current US$)	NY.GDP.MKTP.CD						1.1404e+08	1.32758e+08	1.3903e+08	1.60818e+08	1.6121e+08	1.79079e+08	1.97526e+08	2.70823e+08	4.33096e+08	2.31958e+09	2.49642e+09	3.05477e+09	3.68124e+09	4.10042e+09	6.04437e+09	1.07954e+10	9.36722e+09	8.9322e+09	7.92759e+09	7.63279e+09	6.96762e+09	4.19028e+09	4.91801e+09	4.53513e+09	4.98362e+09	6.03988e+09	6.2845e+09	6.32797e+09	6.20334e+09	6.46778e+09	7.70014e+09	7.66338e+09	7.79303e+09	5.55085e+09	6.30907e+09	6.571e+09	6.09616e+09	6.33308e+09	7.16773e+09	8.61918e+09	1.05472e+10
Bhutan	BTN	GDP (current US$)	NY.GDP.MKTP.CD											6.18121e+07	6.62895e+07	7.01399e+07	7.89003e+07	9.29018e+07	8.68208e+07	8.84613e+07	9.78844e+07	9.40862e+07	1.05378e+08	1.28669e+08	1.39174e+08	1.41439e+08	1.56704e+08	1.60423e+08	1.63289e+08	1.91218e+08	2.42743e+08	2.72298e+08	2.64799e+08	2.87765e+08	2.40294e+08	2.40234e+08	2.25974e+08	2.58955e+08	2.90491e+08	3.03408e+08	3.52229e+08	3.63458e+08	3.99311e+08	4.60733e+08	4.9611e+08	5.59345e+08	6.51935e+08	7.35348e+08	8.60391e+08
Botswana	BWA	GDP (current US$)	NY.GDP.MKTP.CD	3.04114e+07	3.29026e+07	3.5645e+07	3.80918e+07	4.16163e+07	4.57887e+07	5.14657e+07	5.86424e+07	6.62484e+07	7.73615e+07	9.62432e+07	1.27449e+08	1.64461e+08	2.44124e+08	3.06044e+08	3.55169e+08	3.72025e+08	4.51625e+08	5.90407e+08	8.1987e+08	1.06089e+09	1.07381e+09	1.01495e+09	1.17223e+09	1.24082e+09	1.11478e+09	1.3926e+09	1.96523e+09	2.64455e+09	3.08382e+09	3.79064e+09	3.94288e+09	4.14646e+09	4.16013e+09	4.25926e+09	4.7306e+09	4.84776e+09	5.02027e+09	4.79048e+09	5.48426e+09	5.78833e+09	5.48961e+09	5.43886e+09	7.51158e+09	8.95747e+09	9.91891e+09
Central African Republic	CAF	GDP (current US$)	NY.GDP.MKTP.CD	1.12156e+08	1.23135e+08	1.24483e+08	1.29379e+08	1.42025e+08	1.50575e+08	1.5793e+08	1.63821e+08	1.91767e+08	1.88039e+08	1.89107e+08	2.01451e+08	2.30318e+08	2.71183e+08	2.81399e+08	3.7866e+08	4.51152e+08	5.07298e+08	6.10579e+08	7.00765e+08	7.97048e+08	6.94804e+08	7.48312e+08	6.58679e+08	6.37821e+08	8.6485e+08	1.12227e+09	1.20099e+09	1.2649e+09	1.23393e+09	1.44071e+09	1.37737e+09	1.41192e+09	1.27878e+09	8.51174e+08	1.11539e+09	1.00779e+09	9.37742e+08	9.67338e+08	9.99478e+08	9.16777e+08	9.32649e+08	9.96068e+08	1.14232e+09	1.27236e+09	1.33789e+09
Canada	CAN	GDP (current US$)	NY.GDP.MKTP.CD	4.05638e+10	4.10382e+10	4.23362e+10	4.51403e+10	4.95037e+10	5.46494e+10	6.12524e+10	6.58569e+10	7.20488e+10	7.9405e+10	8.81923e+10	9.96065e+10	1.13464e+11	1.31764e+11	1.60949e+11	1.7442e+11	2.07272e+11	2.12325e+11	2.1937e+11	2.43891e+11	2.74777e+11	3.07247e+11	3.14648e+11	3.41866e+11	3.56718e+11	3.66186e+11	3.79007e+11	4.33134e+11	5.0938e+11	5.67212e+11	5.96076e+11	6.12528e+11	5.94387e+11	5.79054e+11	5.79944e+11	6.05961e+11	6.30608e+11	6.54987e+11	634000000000	6.78412e+11	7.44773e+11	7.38982e+11	7.60649e+11	8.95541e+11	1.02669e+12	1.17311e+12
Central Europe and the Baltics	CEB	GDP (current US$)	NY.GDP.MKTP.CD																															2.72115e+11	2.46711e+11	2.55097e+11	2.70375e+11	3.08676e+11	3.94762e+11	4.17518e+11	4.11143e+11	4.49843e+11	4.36028e+11	4.29413e+11	4.69501e+11	5.28525e+11	6.34291e+11	7.6349e+11	8.85716e+11
Switzerland	CHE	GDP (current US$)	NY.GDP.MKTP.CD	1.04122e+10	1.17133e+10	1.29896e+10	1.42839e+10	1.58331e+10	1.67802e+10	1.80194e+10	1.9397e+10	2.07121e+10	2.2442e+10	2.49981e+10	3.00402e+10	3.68443e+10	4.955e+10	5.7103e+10	6.54661e+10	6.84765e+10	7.31358e+10	1.0228e+11	1.1497e+11	1.22558e+11	1.12245e+11	1.15043e+11	1.14634e+11	1.09455e+11	1.1098e+11	1.5909e+11	1.99236e+11	2.15541e+11	2.08106e+11	2.65764e+11	2.68902e+11	2.79921e+11	2.72238e+11	3.01375e+11	3.52836e+11	3.40104e+11	2.94788e+11	3.03459e+11	2.97874e+11	2.79216e+11	2.86583e+11	3.09301e+11	3.62075e+11	4.03913e+11	4.18285e+11
Channel Islands	CHI	GDP (current US$)	NY.GDP.MKTP.CD																																							5.94568e+09	6.26274e+09	6.4397e+09	6.23291e+09	6.66367e+09	7.33224e+09	8.55364e+09	8.82727e+09
Chile	CHL	GDP (current US$)	NY.GDP.MKTP.CD	4.2111e+09	4.94856e+09	5.76597e+09	5.70252e+09	6.06571e+09	6.18399e+09	7.25688e+09	7.14507e+09	7.28682e+09	8.45652e+09	9.26101e+09	1.09998e+10	1.20575e+10	1.72373e+10	1.65843e+10	7.81216e+09	1.05235e+10	1.42727e+10	1.63731e+10	2.22496e+10	2.95867e+10	3.51803e+10	1.97102e+10	2.06297e+10	1.99746e+10	1.79336e+10	1.91978e+10	2.26055e+10	2.61749e+10	3.01018e+10	3.34286e+10	3.82323e+10	4.65389e+10	4.99349e+10	5.74383e+10	7.38204e+10	7.85841e+10	8.57414e+10	8.199e+10	7.55787e+10	7.83398e+10	7.15747e+10	7.0264e+10	7.64926e+10	9.9076e+10	1.22294e+11
China	CHN	GDP (current US$)	NY.GDP.MKTP.CD	5.98462e+10	5.01623e+10	4.73107e+10	5.08122e+10	5.98219e+10	7.0566e+10	7.68541e+10	7.30114e+10	7.09803e+10	7.98478e+10	9.27529e+10	9.9959e+10	1.13872e+11	138764340892	1.44418e+11	1.63688e+11	1.54197e+11	1.75227e+11	1.49789e+11	1.78574e+11	191487500000	1.96218e+11	2.05481e+11	2.3113e+11	2.60443e+11	3.10065e+11	3.0131e+11	2.73455e+11	3.12889e+11	3.48381e+11	3.6156e+11	3.8451e+11	4.28502e+11	4.46557e+11	5.6693e+11	7.38191e+11	8.68524e+11	9.67754e+11	1.03713e+12	1.10384e+12	1.22375e+12	1.35504e+12	1.48982e+12	1.6839e+12	1.9842e+12	2.31755e+12
Cote d'Ivoire	CIV	GDP (current US$)	NY.GDP.MKTP.CD	5.46204e+08	6.18246e+08	6.45284e+08	7.61047e+08	9.21063e+08	9.19771e+08	1.0241e+09	1.08292e+09	1.28128e+09	1.36136e+09	1.45548e+09	1.58413e+09	1.8494e+09	2.50842e+09	3.07015e+09	3.89384e+09	4.66205e+09	6.26507e+09	7.90053e+09	9.14293e+09	1.01756e+10	8.43259e+09	7.56711e+09	6.83818e+09	6.84164e+09	6.97765e+09	9.1583e+09	1.00877e+10	1.02552e+10	9.75741e+09	1.07959e+10	1.04926e+10	1.1153e+10	1.10458e+10	8.31356e+09	1.10001e+10	1.80712e+10	1.80476e+10	1.96197e+10	1.8871e+10	1.65775e+10	1.68105e+10	1.80544e+10	2.12518e+10	2.35106e+10	2.40369e+10
Cameroon	CMR	GDP (current US$)	NY.GDP.MKTP.CD	6.14206e+08	6.52778e+08	6.94248e+08	7.18321e+08	7.7665e+08	8.14083e+08	8.51113e+08	9.36175e+08	1.04619e+09	1.10055e+09	1.15122e+09	1.23694e+09	1.49825e+09	1.90139e+09	2.15742e+09	2.85704e+09	2.89809e+09	3.39466e+09	4.66285e+09	5.919e+09	6.67457e+09	6.61094e+09	6.61126e+09	6.8702e+09	7.31194e+09	8.54481e+09	1.18571e+10	1.30497e+10	1.22361e+10	1.10126e+10	1.23145e+10	1.18402e+10	1.20718e+10	1.61818e+10	8.90245e+09	1.08648e+10	1.10935e+10	1.07895e+10	1.12981e+10	1.15658e+10	1.05666e+10	1.09535e+10	1.24173e+10	1.59703e+10	1.88262e+10	1.95099e+10
Congo, Dem. Rep.	COD	GDP (current US$)	NY.GDP.MKTP.CD	3.3594e+09	3.08675e+09	3.77984e+09	6.21319e+09	2.88155e+09	4.0439e+09	4.53266e+09	3.38406e+09	3.90978e+09	5.03243e+09	4.87768e+09	5.59477e+09	6.17371e+09	7.87024e+09	9.59696e+09	1.02373e+10	9.64858e+09	1.23444e+10	1.53726e+10	1.50684e+10	1.43949e+10	1.25378e+10	1.36517e+10	1.10067e+10	7.85773e+09	7.19504e+09	8.09537e+09	7.66163e+09	8.8613e+09	9.02186e+09	9.34976e+09	9.62544e+09	8.22734e+09	1.07063e+10	5.82038e+09	5.64344e+09	5.77146e+09	6.09084e+09	6.21781e+09	4.71126e+09	1.9088e+10	7.43819e+09	8.72804e+09	8.93757e+09	1.02975e+10	1.26097e+10
Congo, Rep.	COG	GDP (current US$)	NY.GDP.MKTP.CD	1.31732e+08	1.51676e+08	1.66521e+08	1.72233e+08	1.85694e+08	1.98318e+08	2.20614e+08	2.37397e+08	2.51247e+08	2.6504e+08	2.74961e+08	3.22128e+08	4.10669e+08	5.41973e+08	5.85365e+08	7.67103e+08	7.5455e+08	7.65224e+08	8.78772e+08	1.19875e+09	1.7058e+09	1.99351e+09	2.16064e+09	2.09727e+09	2.19358e+09	2.16087e+09	1.84927e+09	2.29775e+09	2.21254e+09	2.38959e+09	2.79875e+09	2.72485e+09	2.93322e+09	2.68432e+09	1.76937e+09	2.116e+09	2.5407e+09	2.32272e+09	1.94948e+09	2.35477e+09	3.22793e+09	2.7967e+09	3.03425e+09	3.50372e+09	4.65697e+09	6.65e+09
Colombia	COL	GDP (current US$)	NY.GDP.MKTP.CD	4.03115e+09	4.54045e+09	4.95554e+09	4.83617e+09	5.97337e+09	5.76076e+09	5.42852e+09	5.82517e+09	5.96021e+09	6.45018e+09	7.19836e+09	7.82038e+09	8.67136e+09	1.03158e+10	1.237e+10	1.30986e+10	1.53414e+10	1.9471e+10	2.32635e+10	2.79404e+10	3.34007e+10	3.63884e+10	3.8968e+10	3.87298e+10	3.82531e+10	3.48944e+10	3.49425e+10	3.63733e+10	3.92126e+10	3.95401e+10	4.78441e+10	4.91756e+10	5.8419e+10	6.64468e+10	8.17035e+10	9.25073e+10	9.71601e+10	1.0666e+11	9.84437e+10	8.61862e+10	9.98751e+10	9.82006e+10	9.79458e+10	9.4645e+10	1.17092e+11	1.45601e+11
Comoros	COM	GDP (current US$)	NY.GDP.MKTP.CD																					2.4339e+08	2.12958e+08	2.02152e+08	1.96193e+08	1.89103e+08	1.91945e+08	2.58144e+08	3.13292e+08	3.36423e+08	3.28665e+08	4.01561e+08	4.00593e+08	4.36553e+08	4.27751e+08	3.1479e+08	3.92775e+08	3.92488e+08	3.62817e+08	3.63932e+08	3.71922e+08	3.39504e+08	3.72746e+08	4.2736e+08	5.4683e+08	6.2268e+08	6.55375e+08
Cabo Verde	CPV	GDP (current US$)	NY.GDP.MKTP.CD																					1.42247e+08	1.39468e+08	1.40631e+08	1.38476e+08	1.32019e+08	1.37728e+08	1.90651e+08	2.35253e+08	2.64308e+08	2.67449e+08	3.06891e+08	3.19827e+08	3.57161e+08	4.90417e+08	4.06581e+08	4.87149e+08	5.01979e+08	4.90609e+08	5.21911e+08	5.92417e+08	5.39227e+08	5.6309e+08	6.20507e+08	8.1326e+08	9.2494e+08	9.72242e+08
Costa Rica	CRI	GDP (current US$)	NY.GDP.MKTP.CD	5.07514e+08	4.90325e+08	4.79181e+08	5.11902e+08	5.42578e+08	5.92981e+08	6.47306e+08	6.99457e+08	7.73841e+08	8.5363e+08	9.8483e+08	1.07715e+09	1.23825e+09	1.52893e+09	1.66654e+09	1.96086e+09	2.41256e+09	3.07243e+09	3.52321e+09	4.03552e+09	4.83145e+09	2.6238e+09	2.60662e+09	3.14677e+09	3.66048e+09	3.9192e+09	4.41898e+09	4.53295e+09	4.61463e+09	5.25103e+09	5.71169e+09	7.21573e+09	8.57975e+09	9.56482e+09	1.04899e+10	1.15786e+10	1.16784e+10	1.26146e+10	1.36843e+10	1.42549e+10	1.50136e+10	1.59762e+10	1.65788e+10	1.72718e+10	1.86106e+10	2.00406e+10
Caribbean small states	CSS	GDP (current US$)	NY.GDP.MKTP.CD	1.1653e+09	1.27202e+09	1.35605e+09	1.44799e+09	1.54622e+09	1.65848e+09	1.7633e+09	1.93e+09	1.98051e+09	2.15251e+09	2.26833e+09	2.45797e+09	2.73446e+09	3.17339e+09	4.20131e+09	4.81983e+09	4.93777e+09	5.93753e+09	6.77642e+09	8.40579e+09	1.08763e+10	1.19775e+10	1.32927e+10	1.31891e+10	1.36891e+10	1.37946e+10	1.17737e+10	1.23345e+10	1.27457e+10	1.26063e+10	1.35734e+10	1.39469e+10	1.4243e+10	1.38158e+10	1.47886e+10	1.57322e+10	1.6942e+10	2.00749e+10	2.16438e+10	2.33939e+10	2.56255e+10	2.65047e+10	2.7742e+10	3.05894e+10	3.35978e+10	3.82243e+10
Cuba	CUB	GDP (current US$)	NY.GDP.MKTP.CD											5693005200	6914658400	8.13515e+09	9.98771e+09	1.1406e+10	1.30274e+10	1.37896e+10	1.42062e+10	1.78447e+10	1.95844e+10	1.99129e+10	2.01503e+10	2.09535e+10	2.22049e+10	2.40394e+10	2.29205e+10	2.42266e+10	2.52139e+10	2.7459e+10	2.70235e+10	2.86454e+10	2.43166e+10	2.20859e+10	2.23673e+10	2.84483e+10	3.04298e+10	25017368700	25365908100	25736331200	28364615200	30565400000	31682400000	33590500000	35901200000	38203000000	42643836100
Curacao	CUW	GDP (current US$)	NY.GDP.MKTP.CD																																									2.12051e+09	2.14345e+09	2.16078e+09	2.20212e+09	2.23716e+09	2.34464e+09
Cayman Islands	CYM	GDP (current US$)	NY.GDP.MKTP.CD
Cyprus	CYP	GDP (current US$)	NY.GDP.MKTP.CD																4.89913e+08	5.7609e+08	7.34876e+08	9.64024e+08	1.2887e+09	2.15431e+09	2.0875e+09	2.15924e+09	2.16036e+09	2.27825e+09	2.43041e+09	3.09073e+09	3.70481e+09	4.27879e+09	4.56348e+09	5.59113e+09	5.7702e+09	6.91215e+09	6.59029e+09	7.4257e+09	9.93314e+09	1.00119e+10	9.54782e+09	1.02486e+10	1.04979e+10	9.98585e+09	1.03979e+10	1.14202e+10	1.45473e+10	17320551250	1.84334e+10
Czechia	CZE	GDP (current US$)	NY.GDP.MKTP.CD																															4.10169e+10	3.0071e+10	3.50511e+10	4.11557e+10	4.81885e+10	6.05724e+10	6.78041e+10	6.25398e+10	6.71872e+10	6.55866e+10	6.21756e+10	6.81353e+10	8.26079e+10	1.00436e+11	1.20148e+11	1.37264e+11
Germany	DEU	GDP (current US$)	NY.GDP.MKTP.CD	8.46198e+10	9.65582e+10	1.05895e+11	1.12233e+11	1.2333e+11	1.34775e+11	1.43304e+11	1.45101e+11	1.56527e+11	1.77733e+11	2.16629e+11	2.50901e+11	3.009e+11	3.99834e+11	4.46935e+11	4.92434e+11	5.21659e+11	6.02698e+11	7.43183e+11	8.84574e+11	9.53772e+11	8.03405e+11	7.79422e+11	7.73508e+11	7.27768e+11	7.35219e+11	1.05009e+12	1.30293e+12	1.40637e+12	1.40409e+12	1.77816e+12	1.87579e+12	2.14138e+12	2.07895e+12	2.21528e+12	2.59305e+12	2.50658e+12	2.21879e+12	2.24776e+12	2.21387e+12	1.96698e+12	1.96638e+12	2.10235e+12	2.53472e+12	2.85232e+12	2.89339e+12
Djibouti	DJI	GDP (current US$)	NY.GDP.MKTP.CD																										3.4099e+08		3.73372e+08	3.95795e+08	4.0922e+08	4.52328e+08	4.62422e+08	4.78058e+08	4.66048e+08	4.91689e+08	4.97724e+08	4.94005e+08	5.02676e+08	5.14268e+08	5.3608e+08	5.51231e+08	5.72417e+08	5.91122e+08	6.22045e+08	6.66072e+08	7.08633e+08
Dominica	DMA	GDP (current US$)	NY.GDP.MKTP.CD																		4.58729e+07	5.71302e+07	5.50178e+07	7.28047e+07	8.21074e+07	8.95276e+07	9.86652e+07	1.09157e+08	1.19492e+08	1.35162e+08	1.51869e+08	1.71106e+08	1.85137e+08	2.0143e+08	2.19763e+08	2.34059e+08	2.45526e+08	2.64374e+08	2.74522e+08	2.92285e+08	3.02989e+08	3.22411e+08	3.31759e+08	3.3347e+08	3.77463e+08	375200000	3.73319e+08	3.96711e+08	3.91456e+08
Denmark	DNK	GDP (current US$)	NY.GDP.MKTP.CD	6.36117e+09	7.05836e+09	7.95327e+09	8.46604e+09	9.6774e+09	1.08707e+10	1.19317e+10	1.30591e+10	1.35056e+10	1.54149e+10	1.70755e+10	1.90862e+10	2.32307e+10	3.07182e+10	3.41257e+10	4.0419e+10	4.45036e+10	4.97117e+10	6.03201e+10	7.0393e+10	7.08113e+10	6.14599e+10	6.00842e+10	6.03312e+10	5.88689e+10	6.24524e+10	8.77487e+10	1.09183e+11	1.1554e+11	1.12312e+11	1.38218e+11	1.39181e+11	1.52966e+11	1.43111e+11	1.56018e+11	1.84848e+11	1.87481e+11	1.73241e+11	1.76877e+11	1.77888e+11	1.64044e+11	1.64882e+11	1.78788e+11	2.18421e+11	2.51986e+11	2.6515e+11
Dominican Republic	DOM	GDP (current US$)	NY.GDP.MKTP.CD	672399700	654100200	824100000	940799900	1025599900	888100000	983900000	1034800000	1079100000	1230500000	1485500000	1666500000	1987400000	2344800000	2925700000	3599200000	3951500000	4587100000	4734400000	5498800000	6761300000	7561300000	8267400000	9220600000	11594000000	5.04458e+09	6.12213e+09	5.82705e+09	5.3743e+09	6.68659e+09	7.07368e+09	9.82448e+09	11605382504	13081042400	1.46447e+10	1.66374e+10	1.82416e+10	2.00175e+10	2.16722e+10	2.21366e+10	2.43058e+10	2.56018e+10	2.71374e+10	2.14032e+10	2.23224e+10	3.57776e+10
Algeria	DZA	GDP (current US$)	NY.GDP.MKTP.CD	2.72362e+09	2.43475e+09	2.00144e+09	2.70298e+09	2.90932e+09	3.13628e+09	3.03986e+09	3.37087e+09	3.85215e+09	4.25725e+09	4.86353e+09	5.07718e+09	6.76674e+09	8.70786e+09	1.32099e+10	1.55579e+10	1.77282e+10	2.09721e+10	2.63645e+10	3.32437e+10	4.23458e+10	4.43486e+10	4.52072e+10	4.88014e+10	5.36985e+10	5.79379e+10	6.3692e+10	6.67458e+10	5.90894e+10	5.56347e+10	6.20485e+10	4.57157e+10	4.80031e+10	4.99456e+10	4.25432e+10	4.17643e+10	4.69416e+10	4.81776e+10	4.81878e+10	4.86407e+10	5.47904e+10	5.94134e+10	6.15161e+10	7.34823e+10	9.19137e+10	1.07047e+11
East Asia & Pacific (excluding high income)	EAP	GDP (current US$)	NY.GDP.MKTP.CD	8.08861e+10	7.12474e+10	6.49892e+10	7.02884e+10	8.11843e+10	9.45949e+10	1.03483e+11	1.00475e+11	1.01581e+11	1.14218e+11	1.27183e+11	1.3658e+11	1.55518e+11	1.95617e+11	2.21666e+11	2.48773e+11	2.52943e+11	2.91533e+11	2.82919e+11	3.27589e+11	3.77947e+11	4.03551e+11	4.23851e+11	4.4384e+11	4.80915e+11	5.26601e+11	5.25183e+11	5.19033e+11	5.76127e+11	6.22836e+11	6.6741e+11	7.24655e+11	8.12995e+11	8.92446e+11	1.07448e+12	1.32574e+12	1.52311e+12	1.57677e+12	1.44128e+12	1.58777e+12	1.74862e+12	1.86293e+12	2.06386e+12	2.3379e+12	2.71236e+12	3.14009e+12
Early-demographic dividend	EAR	GDP (current US$)	NY.GDP.MKTP.CD	1.44722e+11	1.57593e+11	1.59436e+11	1.75994e+11	2.01822e+11	2.18952e+11	2.16878e+11	2.28982e+11	2.49635e+11	2.78946e+11	2.96902e+11	3.19667e+11	3.5271e+11	4.5133e+11	6.32678e+11	6.77326e+11	7.4e+11	8.27432e+11	9.44726e+11	1.11184e+12	1.3825e+12	1.53191e+12	1.46054e+12	1.47401e+12	1.49471e+12	1.49048e+12	1.49803e+12	1.52191e+12	1.60657e+12	1.63426e+12	1.91543e+12	2.0321e+12	2.20797e+12	2.38195e+12	2.50211e+12	2.61683e+12	2.83634e+12	3.02997e+12	2.92128e+12	3.09086e+12	3.3783e+12	3.35182e+12	3.25579e+12	3.62251e+12	4.20973e+12	4.89783e+12
East Asia & Pacific	EAS	GDP (current US$)	NY.GDP.MKTP.CD	1.57319e+11	1.58551e+11	1.62277e+11	1.8111e+11	2.07928e+11	2.31441e+11	2.58962e+11	2.81428e+11	3.10918e+11	3.58521e+11	4.12911e+11	4.58861e+11	5.70489e+11	7.51994e+11	8.67697e+11	9.49601e+11	1.04459e+12	1.24484e+12	1.57247e+12	1707937978688	1.84768e+12	2.03524e+12	1.9938e+12	2.12225e+12	2.2704e+12	2.39479e+12	3.12949e+12	3.67466e+12	4.41768e+12	4.60103e+12	4.80329e+12	5.4272e+12	5.93283e+12	6.63685e+12	7.42541e+12	8.43454e+12	8.13048e+12	7.77269e+12	6.95595e+12	7.77384e+12	8.41245e+12	7.82646e+12	7.95617e+12	8.75345e+12	9.81968e+12	1.04827e+13
Europe & Central Asia (excluding high income)	ECA	GDP (current US$)	NY.GDP.MKTP.CD																												2.35133e+11	2.60715e+11	2.96012e+11	3.54157e+11	3.41086e+11	3.28451e+11	3.39236e+11	2.65717e+11	3.73845e+11	3.95413e+11	4.20615e+11	4.21386e+11	3.84488e+11	3.91259e+11	3.35649e+11	3.90532e+11	4.98092e+11	6.41341e+11	7.98897e+11
Europe & Central Asia	ECS	GDP (current US$)	NY.GDP.MKTP.CD	4.26666e+11	4.69525e+11	5.13406e+11	5.61373e+11	6.20449e+11	6.76604e+11	7.317e+11	7.77321e+11	8.18734e+11	9.07972e+11	1.02081e+12	1.15205e+12	1.38132e+12	1.75715e+12	1.98579e+12	2.31953e+12	2.41137e+12	2.728e+12	3.3443e+12	4.07759e+12	4.60926e+12	4.10576e+12	3.95725e+12	3.83793e+12	3.68952e+12	3.81757e+12	5.20754e+12	6.43175e+12	7.16182e+12	7.2577e+12	8.87088e+12	9.13725e+12	9.78784e+12	8.995e+12	9.40865e+12	1.09422e+13	1.11708e+13	1.06069e+13	1.08026e+13	1.06931e+13	1.00844e+13	1.0189e+13	1.11566e+13	1.35671e+13	1.58148e+13	1.6835e+13
Ecuador	ECU	GDP (current US$)	NY.GDP.MKTP.CD	2.06946e+09	1.75385e+09	1.51821e+09	1.82434e+09	2.24415e+09	2.38705e+09	2.42931e+09	2.5536e+09	2.58218e+09	3.11217e+09	2.8625e+09	2.75422e+09	3.18599e+09	3.89175e+09	6.59926e+09	7.73167e+09	9.09192e+09	1.10263e+10	1.19225e+10	1.41752e+10	1.78815e+10	2.18108e+10	1.99298e+10	1.71525e+10	1.69125e+10	1.71491e+10	1.53141e+10	1.39454e+10	1.30519e+10	1.38908e+10	1.52393e+10	1.69885e+10	1.80942e+10	1.89387e+10	2.27087e+10	2.44329e+10	2.52264e+10	2.81621e+10	2.79819e+10	1.96453e+10	1.75395e+10	23127055000	27054197000	30965208000	35194947000	40278849000
Egypt, Arab Rep.	EGY	GDP (current US$)	NY.GDP.MKTP.CD	4.20627e+09	4.49458e+09	4.03546e+09	4.18715e+09	4.70925e+09	4.94867e+09	5.27801e+09	5.60548e+09	5.93224e+09	6.52446e+09	8.0422e+09	8.60928e+09	9.29964e+09	1.00985e+10	9.22896e+09	1.16322e+10	1.3316e+10	1.44008e+10	1.48117e+10	1.80206e+10	2.16699e+10	2.21361e+10	2.76552e+10	3.09662e+10	3.39712e+10	3.90535e+10	4.12535e+10	4.04556e+10	3.49801e+10	3.97563e+10	4.29789e+10	3.73878e+10	4.1856e+10	4.65786e+10	5.1898e+10	6.01592e+10	6.76297e+10	7.84366e+10	8.48288e+10	9.07107e+10	9.98385e+10	9.66846e+10	8.51461e+10	8.02885e+10	7.87825e+10	8.96603e+10
Euro area	EMU	GDP (current US$)	NY.GDP.MKTP.CD	2.51618e+11	2.80078e+11	3.09695e+11	3.40786e+11	3.77599e+11	4.12775e+11	4.46518e+11	4.74429e+11	5.09989e+11	5.69735e+11	6.45501e+11	7.31657e+11	8.83627e+11	1.14693e+12	1.30064e+12	1.50777e+12	1.5732e+12	1.79012e+12	2.19188e+12	2.65541e+12	2.97369e+12	2.58376e+12	2.50098e+12	2.4401e+12	2.34111e+12	2.40499e+12	3.3773e+12	4.17753e+12	4.5949e+12	4.69311e+12	5.90562e+12	6.12771e+12	6.75051e+12	6.18049e+12	6.53116e+12	7.54004e+12	7.6295e+12	6.97767e+12	7.17436e+12	7.14886e+12	6.52863e+12	6.6319e+12	7.24186e+12	8.92123e+12	1.0231e+13	1.06118e+13
Eritrea	ERI	GDP (current US$)	NY.GDP.MKTP.CD																																	4.77102e+08	4.67873e+08	5.31688e+08	578015625	6.93536e+08	6.8649e+08	7.45523e+08	6.88919e+08	7.06371e+08	7.52372e+08	7.29322e+08	8.70248e+08	1.10905e+09	1.09842e+09
Spain	ESP	GDP (current US$)	NY.GDP.MKTP.CD	1.24245e+10	1.42381e+10	1.66096e+10	1.96317e+10	2.19669e+10	2.54796e+10	2.95594e+10	3.25709e+10	3.23943e+10	3.70907e+10	4.09637e+10	4.65861e+10	5.90902e+10	7.85834e+10	9.72045e+10	1.14695e+11	1.18423e+11	1.32355e+11	1.60485e+11	2.14449e+11	2.32601e+11	2.02663e+11	1.95857e+11	1.70829e+11	1.7198e+11	1.80664e+11	2.51142e+11	3.1852e+11	3.75892e+11	4.14461e+11	5.36175e+11	5.76754e+11	6.30465e+11	5.24701e+11	5.30184e+11	6.1417e+11	6.42251e+11	5.8974e+11	6.18731e+11	6.34395e+11	5.98103e+11	6.27799e+11	7.08938e+11	9.07963e+11	1.06983e+12	1.15467e+12
Estonia	EST	GDP (current US$)	NY.GDP.MKTP.CD																																		4.01309e+09	4.12301e+09	4.50297e+09	4.78602e+09	5.15442e+09	5.67408e+09	5.75691e+09	5.68658e+09	6.25022e+09	7.37012e+09	9.8766e+09	1.21486e+10	1.41095e+10
Ethiopia	ETH	GDP (current US$)	NY.GDP.MKTP.CD	1.61051e+09	1.68086e+09	1.74757e+09	1.82506e+09	1.98413e+09	2.16e+09	2324466416	2.46176e+09	2.61995e+09	2768987372	3.04535e+09	3.22428e+09	3.52025e+09	4.07057e+09	4.57721e+09	4.57705e+09	4.94381e+09	5.65184e+09	6.01496e+09	6.58605e+09	7.01259e+09	7.50766e+09	7.89999e+09	8.78166e+09	8.29831e+09	9.71739e+09	1.00943e+10	1.079e+10	1.11811e+10	1.17629e+10	1.24789e+10	1.37998e+10	1.07548e+10	9.05104e+09	7.10081e+09	7.85521e+09	8.76122e+09	8.80354e+09	8.01327e+09	7.89297e+09	8.24235e+09	8.23133e+09	7.85081e+09	8.62369e+09	1.01312e+10	1.24011e+10
European Union	EUU	GDP (current US$)	NY.GDP.MKTP.CD	2.85152e+11	3.16957e+11	3.50242e+11	3.84747e+11	4.26775e+11	4.67013e+11	5.05529e+11	5.38187e+11	5.77537e+11	6.4449e+11	7.28936e+11	8.23998e+11	9.93808e+11	1.28576e+12	1.45556e+12	1.69469e+12	1.77505e+12	2.01102e+12	2.44923e+12	2.96009e+12	3.3114e+12	2.89005e+12	2.78787e+12	2.71086e+12	2612656839102	2.68673e+12	3.75327e+12	4.63961e+12	5094084472960	5.20288e+12	6.5057e+12	6.72763e+12	7.3893e+12	6.75081e+12	7.15791e+12	8.29835e+12	8.43361e+12	7.73589e+12	7.9701e+12	7.93611e+12	7.28848e+12	7.40762e+12	8.10043e+12	9.95686e+12	1.14491e+13	11954349375612
Fragile and conflict affected situations	FCS	GDP (current US$)	NY.GDP.MKTP.CD	3.40295e+10	3.55344e+10	3.9269e+10	4.48801e+10	4.06142e+10	4.46207e+10	4.76076e+10	4.69535e+10	5.18775e+10	5.82228e+10	6.93371e+10	7.14075e+10	8.26693e+10	1.02252e+11	1.53919e+11	1.68821e+11	2.0051e+11	2.21371e+11	2.42768e+11	3.05997e+11	3.8823e+11	5.10372e+11	4.86769e+11	4.20187e+11	3.78001e+11	3.84378e+11	3.54356e+11	3.56313e+11	3.8702e+11	3.83036e+11	5.46007e+11	3.86414e+11	3.44196e+11	3.50712e+11	3.52567e+11	4.30902e+11	4.65761e+11	5.212e+11	5.3518e+11	3.994e+11	4.66929e+11	4.57048e+11	4.46089e+11	4.69848e+11	5.95876e+11	7.56354e+11
Finland	FIN	GDP (current US$)	NY.GDP.MKTP.CD	5.27948e+09	5.98443e+09	6.4078e+09	6.95892e+09	7.84899e+09	8.68039e+09	9.30614e+09	9.46827e+09	8.91657e+09	1.01775e+10	1.13585e+10	1.25285e+10	1.47445e+10	1.94741e+10	2.4851e+10	2.94753e+10	3.18524e+10	3.35028e+10	3.62594e+10	4.44692e+10	5.365e+10	5.24401e+10	5.2784e+10	5.09564e+10	5.2871e+10	5.58567e+10	7.35116e+10	9.1565e+10	1.09039e+11	1.18991e+11	1.41446e+11	1.27794e+11	1.12538e+11	8.91121e+10	1.03183e+11	1.3406e+11	1.31992e+11	1.26863e+11	1.33991e+11	1.35234e+11	1.25968e+11	1.2952e+11	1.40361e+11	1.71613e+11	1.97458e+11	2.04859e+11
Fiji	FJI	GDP (current US$)	NY.GDP.MKTP.CD	1.12328e+08	1.16988e+08	1.22906e+08	1.29455e+08	1.40033e+08	1.47085e+08	1.50604e+08	1.62626e+08	1.66953e+08	1.82182e+08	2.19878e+08	2.47749e+08	3.16657e+08	4.2595e+08	5.58587e+08	6.84282e+08	6.94541e+08	7.19502e+08	8.29268e+08	1.01969e+09	1.20262e+09	1.23563e+09	1.19406e+09	1.12309e+09	1.178e+09	1.14117e+09	1.29027e+09	1.17795e+09	1.11001e+09	1.18266e+09	1.33702e+09	1.38388e+09	1.53241e+09	1.6361e+09	1.82573e+09	1.9703e+09	2.1287e+09	2.09022e+09	1.65315e+09	1.93646e+09	1.67822e+09	1.65246e+09	1.83328e+09	2.30049e+09	2.70808e+09	2.9804e+09
France	FRA	GDP (current US$)	NY.GDP.MKTP.CD	6.19591e+10	6.71581e+10	7.5197e+10	8.42276e+10	9.34242e+10	1.00928e+11	1.09307e+11	1.18089e+11	1.28711e+11	1.40661e+11	1.47313e+11	1.64694e+11	2.01739e+11	2.61971e+11	2.82739e+11	3.57324e+11	3.68363e+11	4.06402e+11	5.01724e+11	6.08219e+11	6.94529e+11	6.09185e+11	5.78152e+11	5.53356e+11	5.25033e+11	5.47221e+11	7.64947e+11	9.26321e+11	1.01083e+12	1.01674e+12	1.25765e+12	1.25896e+12	1.38966e+12	1.31438e+12	1.38582e+12	1.59522e+12	1.59889e+12	1.44939e+12	1.49691e+12	1.48692e+12	1.36096e+12	1.37038e+12	1.49243e+12	1.8351e+12	2.10979e+12	2.19215e+12
Faroe Islands	FRO	GDP (current US$)	NY.GDP.MKTP.CD						5.79545e+07	6.43971e+07	6.62254e+07	6.51867e+07	7.01067e+07	8.49333e+07	9.92191e+07	1.19336e+08	1.61236e+08	1.96771e+08	2.27404e+08	2.7047e+08	3.47798e+08	3.97833e+08	4.48568e+08	4.93014e+08	4.56245e+08	4.44047e+08	4.86605e+08	4.26009e+08	4.59307e+08	6.88914e+08	8.86509e+08	9.68577e+08	8.71935e+08	9.60805e+08	9.09253e+08	9.1267e+08	7.60957e+08	7.58739e+08	9.01405e+08	9.89537e+08	9.33763e+08	1.10474e+09	1.12768e+09	1.06711e+09	1.16027e+09	1.27509e+09	1.50194e+09	1.72477e+09	1.75974e+09
Micronesia, Fed. Sts.	FSM	GDP (current US$)	NY.GDP.MKTP.CD											19885926	21783158	25100928	34821467	46095175	46119184	46813193	47305560	53656834	60270778	64186644	76472529	80055706	84110353	84676118	101931941	112210000	116700000	124700000	135200000	147200000	166200000	178100000	198400000	202500000	2.1993e+08	2.16546e+08	2.04397e+08	2.16521e+08	2.17199e+08	2.29617e+08	2.36388e+08	2.37654e+08	2.4095e+08	2.35538e+08	2.45905e+08
Gabon	GAB	GDP (current US$)	NY.GDP.MKTP.CD	1.41469e+08	1.67638e+08	1.82797e+08	1.5448e+08	2.1568e+08	2.26474e+08	2.4585e+08	2.71544e+08	2.94469e+08	3.18125e+08	3.23802e+08	3.81687e+08	4.30508e+08	7.22781e+08	1.54422e+09	2.15759e+09	3.00941e+09	2.80935e+09	2.38948e+09	3.03025e+09	4.27964e+09	3.86227e+09	3.61801e+09	3.39128e+09	3.56145e+09	3.33991e+09	3.40364e+09	3.2818e+09	3.8345e+09	4.18641e+09	5.95229e+09	5.40292e+09	5.59239e+09	4.37865e+09	4.19082e+09	4.95885e+09	5.69404e+09	5.32682e+09	4.48342e+09	4.66299e+09	5.08048e+09	5.02327e+09	5.33545e+09	6.5119e+09	7.77022e+09	9.58278e+09
United Kingdom	GBR	GDP (current US$)	NY.GDP.MKTP.CD	7.3234e+10	7.7742e+10	8.12476e+10	8.6562e+10	9.44076e+10	1.01825e+11	1.08573e+11	1.13117e+11	1.0776e+11	1.16465e+11	1.30672e+11	1.48114e+11	1.69965e+11	1.92538e+11	2.06131e+11	2.41757e+11	2.32615e+11	2.63066e+11	3.35883e+11	4.38994e+11	5.64948e+11	5.40766e+11	5.15049e+11	4.89618e+11	4.61487e+11	4.89285e+11	6.01453e+11	7.45163e+11	9.10123e+11	9.26885e+11	1.09317e+12	1.1428e+12	1.17966e+12	1.06139e+12	1.14049e+12	1.34909e+12	1.42529e+12	1.56932e+12	1.66082e+12	1.69346e+12	1.6716e+12	1.65617e+12	1.79054e+12	2.06123e+12	2.42977e+12	2.55136e+12
Georgia	GEO	GDP (current US$)	NY.GDP.MKTP.CD																												7.32198e+09	8.83359e+09	8.90263e+09	7.73593e+09	6.3245e+09	3.69033e+09	2.70118e+09	2.51387e+09	2.69373e+09	3.09494e+09	3.51052e+09	3.6135e+09	2.80003e+09	3.05748e+09	3.21946e+09	3.39577e+09	3.99138e+09	5.12537e+09	6.41091e+09
Ghana	GHA	GDP (current US$)	NY.GDP.MKTP.CD	1.21723e+09	1.30267e+09	1.38252e+09	1.5408e+09	1.7313e+09	2.05346e+09	2.1263e+09	1.74719e+09	1.66691e+09	1.96205e+09	2.21503e+09	2.41711e+09	2.11229e+09	3.00677e+09	2.89441e+09	2.81011e+09	2.76525e+09	3.18943e+09	3.66248e+09	4.02023e+09	4.44523e+09	4.22244e+09	4.03599e+09	4.05728e+09	4.41228e+09	4.50431e+09	5.73568e+09	5.07483e+09	5.19777e+09	5.25186e+09	5.88911e+09	6.60319e+09	6.4161e+09	5.96892e+09	5.44638e+09	6.46438e+09	6.93299e+09	6.89144e+09	7.48207e+09	7.71811e+09	4.98285e+09	5.31487e+09	6.1662e+09	7.63272e+09	8.88142e+09	1.07446e+10
Gibraltar	GIB	GDP (current US$)	NY.GDP.MKTP.CD
Guinea	GIN	GDP (current US$)	NY.GDP.MKTP.CD											3.22022e+09	3.5943e+09	4.20307e+09	5.15208e+09	5.69142e+09	6.10277e+09	6.76278e+09	6.91438e+09	8.08731e+09	8.87709e+09	9.74652e+09	9.64644e+09	1.1926e+10	1.51299e+10	1.84215e+10	2.27876e+10	2.90913e+09	2.97671e+09	3.47648e+09	3.54608e+09	3.88832e+09	4.39618e+09	4.78922e+09	4.78117e+09	4.9328e+09	5.3857e+09	5.64124e+09	5.51692e+09	5.23212e+09	5.04681e+09	4.36746e+09	4.12553e+09	4.30161e+09	5.02517e+09	5.30077e+09	4.28247e+09
Gambia, The	GMB	GDP (current US$)	NY.GDP.MKTP.CD							4.42121e+07	4.6695e+07	4.11601e+07	4.51681e+07	5.22961e+07	5.57287e+07	5.91606e+07	7.51877e+07	9.5796e+07	1.1518e+08	1.12191e+08	1.38093e+08	1.71833e+08	2.07113e+08	2.41083e+08	2.18768e+08	2.16051e+08	2.13449e+08	1.77341e+08	2.25726e+08	1.85647e+08	2.20626e+08	2.66672e+08	2.8412e+08	3.17084e+08	6.90311e+08	7.14254e+08	7.55041e+08	7.46494e+08	7.86e+08	8.48239e+08	8.03633e+08	8.40285e+08	8.14724e+08	7.82914e+08	6.87411e+08	5.78235e+08	4.87039e+08	9.61901e+08	1.0277e+09
Guinea-Bissau	GNB	GDP (current US$)	NY.GDP.MKTP.CD											2.04671e+08	2.04167e+08	2.27986e+08	2.32331e+08	2.5677e+08	2.83312e+08	2.92152e+08	2.98872e+08	3.18877e+08	3.08143e+08	2.87648e+08	4.02231e+08	4.30284e+08	4.25225e+08	3.5998e+08	3.73959e+08	3.38524e+08	4.51893e+08	4.27514e+08	5.54072e+08	6.34187e+08	6.68471e+08	5.88309e+08	6.1578e+08	6.12502e+08	6.60195e+08	7.02965e+08	6.98107e+08	5.91034e+08	5.79366e+08	3.91346e+08	4.12611e+08	4.66774e+08	5.53615e+08	5.8217e+08	6.39776e+08
Equatorial Guinea	GNQ	GDP (current US$)	NY.GDP.MKTP.CD			3.72533e+07	4.42667e+07	51915000	6.47483e+07	69110000	7.23174e+07	6.75143e+07	6.72257e+07	6.63314e+07	6.4947e+07	6.54292e+07	8.12032e+07	9.41599e+07	1.04296e+08	1.03653e+08	1.03988e+08			5.06429e+07	3.67314e+07	4.42946e+07	4.44425e+07	5.03209e+07	6.21186e+07	7.64074e+07	9.33459e+07	1.00535e+08	8.8266e+07	1.12119e+08	1.10906e+08	1.34707e+08	1.36048e+08	1.00807e+08	1.41853e+08	2.32463e+08	4.42338e+08	3.70688e+08	6.21118e+08	1.046e+09	1.46114e+09	1.80674e+09	2.48475e+09	4.41076e+09	8.21737e+09
Greece	GRC	GDP (current US$)	NY.GDP.MKTP.CD	4.27489e+09	4.8924e+09	5.14054e+09	5.81329e+09	6.57691e+09	7.58221e+09	8.47202e+09	9.14659e+09	9.95033e+09	1.14541e+10	1.29571e+10	1.43888e+10	1.66507e+10	2.2037e+10	2.49987e+10	2.81291e+10	3.07196e+10	3.56731e+10	4.36545e+10	5.37241e+10	5.60393e+10	5.16185e+10	5.38583e+10	4.87414e+10	4.73521e+10	4.71557e+10	5.55954e+10	6.47396e+10	7.52006e+10	7.80679e+10	9.65296e+10	1.03681e+11	1.14608e+11	1.07296e+11	1.1498e+11	1.34975e+11	1.42503e+11	1.38766e+11	1.39613e+11	1.37131e+11	1.2576e+11	1.3205e+11	1.50254e+11	1.96931e+11	2.3498e+11	2.42316e+11
Grenada	GRD	GDP (current US$)	NY.GDP.MKTP.CD																		7.14945e+07	8.83224e+07	1.02244e+08	1.109e+08	1.15652e+08	125435590	1.31804e+08	1.45533e+08	1.67728e+08	1.8759e+08	2.1501e+08	2.36358e+08	2.67328e+08	2.78099e+08	3.00758e+08	3.1016e+08	3.09812e+08	3.25112e+08	3.42173e+08	3.66911e+08	3.92191e+08	4.45904e+08	4.82009e+08	5.20044e+08	5.20444e+08	5.40337e+08	5.91018e+08	5.99119e+08	6.95556e+08
Greenland	GRL	GDP (current US$)	NY.GDP.MKTP.CD											6.952e+07	8.84667e+07	1.06101e+08	1.40154e+08	1.69919e+08	2.11191e+08	2.40779e+08	2.8227e+08	3.55987e+08	4.20646e+08	4.76052e+08	4.35749e+08	4.02403e+08	4.16184e+08	3.79372e+08	4.12876e+08	6.03016e+08	7.8739e+08	8.98608e+08	9.298e+08	1.01898e+09	1.0165e+09	1.03792e+09	9.27214e+08	1.00589e+09	1.20895e+09	1.19752e+09	1.07215e+09	1.14986e+09	1.13156e+09	1.06803e+09	1.08617e+09	1.16914e+09	1.55876e+09	1.8225e+09	1.8498e+09
Guatemala	GTM	GDP (current US$)	NY.GDP.MKTP.CD	1043599900	1076699900	1143600000	1262800000	1299099900	1331399900	1390700000	1453500000	1610500000	1715399900	1904000000	1984800000	2101300000	2569200100	3161499900	3645900000	4365300200	5480500200	6070600200	6902600200	7878700000	8607500300	8716999700	9050000400	9470000100	9.72165e+09	7.23196e+09	7084399840	7.8416e+09	8.41072e+09	7.6502e+09	9.40614e+09	1.04408e+10	1.14e+10	1.29832e+10	1.46554e+10	1.56748e+10	1.779e+10	1.93955e+10	1.83184e+10	1.92889e+10	1.84052e+10	2.04442e+10	2.15764e+10	2.35773e+10	2.67834e+10
Guam	GUM	GDP (current US$)	NY.GDP.MKTP.CD																																											3394000000	3569000000	3869000000	4213000000
Guyana	GUY	GDP (current US$)	NY.GDP.MKTP.CD	1.70216e+08	1.8585e+08	1.9495e+08	1.75758e+08	1.94775e+08	2.13235e+08	2.28706e+08	2.50176e+08	229750000	249300000	267800000	282050000	2.85381e+08	3.07048e+08	4.33955e+08	4.94792e+08	454440000	449880000	507080000	530440000	603200000	5.70357e+08	482000000	4.89333e+08	4.37632e+08	4.53488e+08	5.04651e+08	3.54592e+08	413799990	3.79779e+08	3.96582e+08	3.48533e+08	3.73573e+08	4.54101e+08	5.40875e+08	6.21627e+08	7.05406e+08	7.49138e+08	7.17531e+08	6.94755e+08	7.12668e+08	7.12167e+08	7.26131e+08	7.43064e+08	7.87814e+08	8.24881e+08
High income	HIC	GDP (current US$)	NY.GDP.MKTP.CD	1.09343e+12	1.16623e+12	1.26114e+12	1.35648e+12	1.48259e+12	1.6115e+12	1.76338e+12	1.88377e+12	2.04331e+12	2.25216e+12	2.47235e+12	2.74679e+12	3.19054e+12	3.87042e+12	4.37749e+12	4.8842e+12	5.31943e+12	6.02208e+12	7.22925e+12	8.35573e+12	9.32837e+12	9.4698e+12	9.37604e+12	9.68629e+12	10098746534234	1.05968e+13	1.28713e+13	1.49233e+13	1.67964e+13	17494368252472	1.95926e+13	2.06768e+13	2.21418e+13	2.22996e+13	2.38528e+13	2.64749e+13	2.66893e+13	2.6256e+13	2.62132e+13	2.74569e+13	2.80954e+13	2.78713e+13	2.90878e+13	3.26536e+13	3.64796e+13	3.874e+13
Hong Kong SAR, China	HKG	GDP (current US$)	NY.GDP.MKTP.CD	1.3208e+09	1.38368e+09	1.61235e+09	1.9353e+09	2.20647e+09	2.43508e+09	2.48985e+09	2.69247e+09	2.71696e+09	3.18974e+09	3.80077e+09	4.476e+09	5.71009e+09	8.03012e+09	9.3887e+09	1.00481e+10	1.28764e+10	1.57194e+10	1.83151e+10	2.25262e+10	2.88619e+10	3.10552e+10	3.22912e+10	2.99072e+10	3.35114e+10	3.56998e+10	4.10754e+10	5.06229e+10	5.97074e+10	6.87902e+10	7.69288e+10	8.896e+10	1.04273e+11	120354212475	1.35812e+11	1.44652e+11	1.59718e+11	1.77353e+11	1.68885e+11	1.65768e+11	1.71669e+11	1.69404e+11	1.66349e+11	1.61386e+11	1.691e+11	1.81569e+11
Honduras	HND	GDP (current US$)	NY.GDP.MKTP.CD	475650000	503300000	532450000	553500000	591100000	651050000	692150000	750950000	815450000	844400000	904400000	958450000	1.03065e+09	1.1283e+09	1243000000	1330050000	1589300000	1900700000	2393650000	2778900000	3184400000	3501800000	3619500000	3840550000	4029900000	4328300000	4706100000	5024800000	4.89266e+09	4.3759e+09	3.73446e+09	3.69938e+09	4.12285e+09	4.19077e+09	4.10569e+09	4.67235e+09	4.79883e+09	5.56918e+09	6.16371e+09	6.39409e+09	7.18664e+09	7.65116e+09	7.85826e+09	8.23039e+09	8.8693e+09	9.75701e+09
Heavily indebted poor countries (HIPC)	HPC	GDP (current US$)	NY.GDP.MKTP.CD	2.19237e+10	2.26277e+10	2.45995e+10	2.88935e+10	2.68786e+10	3.0407e+10	3.29711e+10	3.24887e+10	3.49945e+10	3.85033e+10	3.71815e+10	4.00995e+10	4.45648e+10	5.45536e+10	6.42574e+10	7.23509e+10	7.75855e+10	8.98854e+10	1.04622e+11	1.1493e+11	1.2726e+11	1.2791e+11	1.29278e+11	1.28222e+11	1.30636e+11	1.37197e+11	1.26219e+11	1.34509e+11	1.41558e+11	1.44132e+11	1.65447e+11	1.80013e+11	1.36845e+11	1.42051e+11	1.21514e+11	1.41396e+11	1.54689e+11	1.61933e+11	1.67621e+11	1.68431e+11	1.8193e+11	1.7588e+11	1.90891e+11	2.1661e+11	2.49571e+11	2.88591e+11
Croatia	HRV	GDP (current US$)	NY.GDP.MKTP.CD																															2.56502e+10	1.87604e+10	1.06212e+10	1.12596e+10	1.50629e+10	2.27724e+10	2.4151e+10	2.41758e+10	2.58902e+10	2.3777e+10	2.21344e+10	2.30669e+10	2.67577e+10	3.52453e+10	4.18363e+10	4.50131e+10
Haiti	HTI	GDP (current US$)	NY.GDP.MKTP.CD	273187200	271066000	281896800	294883400	325281200	353251800	368948600	369124200	367968800	391820400	331200000	362800000	3.71999e+08	4.66799e+08	5.65399e+08	681400000	879000000	947000000	974200000	1080600000	1383800000	1479400000	1474200000	1623600000	1816200000	2009400000	2318000000	2047200000	2613926800	2736243800	3096289800	3.47356e+09	2.25713e+09	1.87825e+09	2.16757e+09	2.81331e+09	2.90752e+09	3.33895e+09	3.7239e+09	4.15373e+09	6.81357e+09	6.33197e+09	6.20585e+09	5.07195e+09	6.08736e+09	7.03015e+09
Hungary	HUN	GDP (current US$)	NY.GDP.MKTP.CD									4.88622e+09	5.42981e+09	5.78093e+09	6.29157e+09	7.37931e+09	9.13829e+09	1.00163e+10	1.14204e+10	1.32356e+10	1.47837e+10	1.72867e+10	1.99597e+10	2.3117e+10	2.37059e+10	2.41417e+10	2.19104e+10	2.12427e+10	2.15106e+10	2.47782e+10	2.7232e+10	2.97998e+10	3.04225e+10	3.44784e+10	3.48673e+10	3.88573e+10	4.02562e+10	4.33079e+10	4.65776e+10	4.68338e+10	4.73986e+10	4.87844e+10	4.91602e+10	4.7276e+10	5.38001e+10	6.76365e+10	8.51905e+10	1.04015e+11	1.13098e+11
IBRD only	IBD	GDP (current US$)	NY.GDP.MKTP.CD	3.06261e+11	3.10009e+11	3.13911e+11	3.46366e+11	3.92564e+11	4.30309e+11	4.44621e+11	4.57224e+11	4.84483e+11	5.40875e+11	5.88894e+11	6.41994e+11	7.23737e+11	9.38398e+11	1.18747e+12	1.28231e+12	1.39194e+12	1.57737e+12	1.74391e+12	2.0374e+12	2.41891e+12	2.59858e+12	2.56051e+12	2.52927e+12	2.61901e+12	2.71987e+12	2.82385e+12	2.90986e+12	3.11072e+12	3.24115e+12	3.64593e+12	3.5336e+12	3.6917e+12	3.93067e+12	4.33687e+12	4.98784e+12	5.44387e+12	5.77506e+12	5.55006e+12	5408483629656	5.88613e+12	5.97161e+12	6.06578e+12	6.81415e+12	8.11739e+12	9.69475e+12
IDA & IBRD total	IBT	GDP (current US$)	NY.GDP.MKTP.CD	3.51708e+11	3.58253e+11	3.66133e+11	4.04105e+11	4.48836e+11	4.93478e+11	5.1316e+11	5.26614e+11	5.5802e+11	6.2347e+11	6.8089e+11	7.34109e+11	8.21457e+11	1.0498e+12	1.33459e+12	1.45792e+12	1.5743e+12	1.77463e+12	1.96781e+12	2.29303e+12	2.72403e+12	3.04846e+12	2987463443946	2.89134e+12	2.95442e+12	3.06563e+12	3.12983e+12	3.22637e+12	3.44366e+12	3.57594e+12	4.02362e+12	3.94058e+12	4055225988619	4.31283e+12	4.7327e+12	5.46865e+12	5.99803e+12	6.35535e+12	6.15379e+12	5.86097e+12	6.40516e+12	6.48481e+12	6.61883e+12	7.43804e+12	8.84694e+12	1.05439e+13
IDA total	IDA	GDP (current US$)	NY.GDP.MKTP.CD	4.34191e+10	4.58778e+10	4.9353e+10	5.45569e+10	5.39499e+10	6.04151e+10	6.52477e+10	6.61548e+10	7.01071e+10	7.87018e+10	8.74936e+10	8.85396e+10	9.46908e+10	1.09975e+11	1.44311e+11	1.69844e+11	1.77486e+11	1.93294e+11	2.1854e+11	2.50377e+11	2.98604e+11	4.23178e+11	4.03272e+11	3.4832e+11	3.27545e+11	3.38015e+11	3.06448e+11	3.16801e+11	3.34042e+11	3.35572e+11	3.78602e+11	4.08936e+11	3.645e+11	3.83118e+11	3.96482e+11	4.81965e+11	5.55978e+11	5.82076e+11	6.06352e+11	4.52394e+11	5.19434e+11	5.13449e+11	5.53708e+11	6.24669e+11	7.30301e+11	8.49794e+11
IDA blend	IDB	GDP (current US$)	NY.GDP.MKTP.CD	1.24015e+10	1.33147e+10	1.42224e+10	1.51452e+10	1.66266e+10	1.79772e+10	1.96055e+10	1.97953e+10	2.10475e+10	2.39607e+10	3.23566e+10	3.03928e+10	3.41671e+10	3.7108e+10	5.27541e+10	6.10467e+10	7.34413e+10	7.90205e+10	8.71292e+10	1.06209e+11	1.34447e+11	2.4548e+11	2.24352e+11	1.71851e+11	1.48715e+11	1.4936e+11	1.38016e+11	1.42226e+11	1.48184e+11	1.43853e+11	1.5902e+11	1.70036e+11	1.65356e+11	1.75245e+11	1.90983e+11	2.6731e+11	3.28495e+11	3.4404e+11	3.6089e+11	2.03538e+11	2.4429e+11	2.43968e+11	2.67622e+11	3.0294e+11	3.65116e+11	4.28329e+11
Indonesia	IDN	GDP (current US$)	NY.GDP.MKTP.CD								5.66776e+09	7.07647e+09	8.33742e+09	9.15068e+09	9.33354e+09	1.09976e+10	1.62733e+10	2.58024e+10	3.04639e+10	3.72692e+10	4.58089e+10	5.14557e+10	5.14002e+10	7.24823e+10	8.55182e+10	9.01584e+10	8.10523e+10	8.48537e+10	8.52895e+10	7.99541e+10	7.59296e+10	8.43002e+10	9.44514e+10	1.06141e+11	1.16622e+11	1.28027e+11	1.58007e+11	1.76892e+11	2.02132e+11	2.2737e+11	2.15749e+11	9.54455e+10	1.40001e+11	1.65021e+11	1.60447e+11	1.95661e+11	2.34772e+11	2.56837e+11	2.85869e+11
IDA only	IDX	GDP (current US$)	NY.GDP.MKTP.CD	3.22101e+10	3.3771e+10	3.64541e+10	4.10131e+10	3.85112e+10	4.39221e+10	4.71995e+10	4.79582e+10	5.0738e+10	5.65492e+10	5.58382e+10	5.9167e+10	6.1397e+10	7.42181e+10	9.27986e+10	1.10395e+11	1.04542e+11	1.14933e+11	1.32428e+11	1.44547e+11	1.6366e+11	1.71044e+11	1.73616e+11	1.74262e+11	1.78151e+11	1.88346e+11	1.67903e+11	1.74072e+11	1.85616e+11	1.92291e+11	2.2076e+11	2.40281e+11	1.99753e+11	2.08451e+11	2.05686e+11	2.13387e+11	2.25164e+11	2.35602e+11	2.4282e+11	2.49682e+11	2.75642e+11	2.69902e+11	2.8641e+11	3.22064e+11	3.65261e+11	4.21453e+11
Isle of Man	IMN	GDP (current US$)	NY.GDP.MKTP.CD																									2.51196e+08	2.56331e+08	3.56287e+08	4.59975e+08	5.84703e+08	6.17619e+08	7.61515e+08	8.21508e+08	8.54849e+08	7.65648e+08	8.33255e+08	9.22269e+08	1.00721e+09	1.17826e+09	1.38512e+09	1.57374e+09	1.60105e+09	1.66868e+09	1.891e+09	2.25262e+09	2.80221e+09	3.03241e+09
India	IND	GDP (current US$)	NY.GDP.MKTP.CD	3.70299e+10	3.92324e+10	4.21615e+10	4.84219e+10	5.64803e+10	5.95561e+10	4.55812e+10	50134942204	5.30855e+10	5.8448e+10	6.24225e+10	6.73514e+10	7.14647e+10	8.55177e+10	9.95266e+10	9.84738e+10	1.02716e+11	1.21487e+11	1.37302e+11	1.52995e+11	1.86329e+11	1.93491e+11	2.00716e+11	2.18262e+11	2.12158e+11	2.32512e+11	2.48986e+11	2.79034e+11	2.9659e+11	2.96042e+11	3.20979e+11	2.70105e+11	2.88208e+11	2.79296e+11	3.27275e+11	3.60282e+11	3.92897e+11	4.15868e+11	4.21351e+11	4.58821e+11	4.68396e+11	4.8544e+11	5.14939e+11	6.07701e+11	7.09153e+11	8.20384e+11
Not classified	INX	GDP (current US$)	NY.GDP.MKTP.CD
Ireland	IRL	GDP (current US$)	NY.GDP.MKTP.CD	1.99855e+09	2.15177e+09	2.32937e+09	2.50507e+09	2.85109e+09	3.03566e+09	3.19882e+09	3.44574e+09	3.3787e+09	3.90272e+09	4.396e+09	5.09825e+09	6.31806e+09	7.48117e+09	7.89686e+09	9.48381e+09	9.45376e+09	1.12483e+10	1.4648e+10	1.83193e+10	2.17479e+10	2.06702e+10	2.14748e+10	2.0766e+10	2.01066e+10	2.127e+10	2.87146e+10	3.39205e+10	3.77729e+10	3.92384e+10	4.93056e+10	4.97875e+10	5.59185e+10	5.24175e+10	5.70977e+10	6.91398e+10	7.57908e+10	8.28566e+10	9.01994e+10	9.8894e+10	1.00208e+11	1.09347e+11	1.28596e+11	1.64671e+11	1.94372e+11	2.11877e+11
Iran, Islamic Rep.	IRN	GDP (current US$)	NY.GDP.MKTP.CD	4.19913e+09	4.42695e+09	4.69357e+09	4.92863e+09	5.37985e+09	6.19732e+09	6.78994e+09	7.55538e+09	8.62317e+09	9.74309e+09	1.09762e+10	1.37318e+10	1.71535e+10	2.70817e+10	4.62091e+10	5.17762e+10	6.80553e+10	8.06001e+10	7.79943e+10	9.03919e+10	9.43623e+10	1.00499e+11	1.25949e+11	1.56365e+11	1.62277e+11	1.80184e+11	2.09095e+11	1.3401e+11	1.23058e+11	1.20496e+11	1.24813e+11	1.31638e+11	1.19769e+11	6.37436e+10	7.18415e+10	9.64192e+10	1.20404e+11	1.13919e+11	1.10277e+11	1.13848e+11	1.09592e+11	1.26879e+11	1.28627e+11	1.51911e+11	1.87755e+11	2.2497e+11
Iraq	IRQ	GDP (current US$)	NY.GDP.MKTP.CD	1.53725e+09	1.67196e+09	1.78417e+09	1.8059e+09	2.13641e+09	2.33579e+09	2.53031e+09	2.55152e+09	2.8966e+09	3.00776e+09	3.28132e+09	3.86535e+09	4.11385e+09	5.13437e+09	1.15168e+10	1.34585e+10	1.77548e+10	1.98381e+10	2.37623e+10	3.78165e+10	52569000000	37823000000	4.23823e+10	4.07129e+10	4.69384e+10	4.84252e+10	4.72645e+10	5.67742e+10	6.26845e+10	6.58319e+10	1.80408e+11	4.07796e+08	5.53672e+08	1.03194e+09	3.99135e+09	1.2894e+10	1.04337e+10	2.07649e+10	2.06174e+10	3.68816e+10	4.83643e+10	3.61764e+10	3.29285e+10	2.19216e+10	3.66337e+10	5.00651e+10
Iceland	ISL	GDP (current US$)	NY.GDP.MKTP.CD	2.60984e+08	2.66711e+08	2.9931e+08	3.57241e+08	4.56206e+08	5.50151e+08	6.60664e+08	6.52609e+08	4.98365e+08	4.3566e+08	5.45116e+08	6.9368e+08	8.69003e+08	1.19479e+09	1.56815e+09	1.45605e+09	1.72785e+09	2.28571e+09	2.59963e+09	2.95318e+09	3.49962e+09	3.61509e+09	3.31871e+09	2.86263e+09	2.96457e+09	3.08836e+09	4.12908e+09	5.71328e+09	6.32009e+09	5.87085e+09	6.69485e+09	7.15126e+09	7.3285e+09	6.43595e+09	6.6128e+09	7.37264e+09	7.68657e+09	7.71678e+09	8.63773e+09	9.10764e+09	9.14017e+09	8.3234e+09	9.4162e+09	1.15647e+10	1.39639e+10	1.71464e+10
Israel	ISR	GDP (current US$)	NY.GDP.MKTP.CD	3.07059e+09	3.70859e+09	2.96615e+09	3.53595e+09	4.02434e+09	4.32908e+09	4.7033e+09	4.76239e+09	5.45843e+09	6.29785e+09	7.40671e+09	7.05254e+09	9.22256e+09	1.19026e+10	1.71726e+10	1.61418e+10	1.59563e+10	1.82571e+10	1.77013e+10	2.26097e+10	2.53953e+10	2.6882e+10	2.92553e+10	3.26758e+10	3.06456e+10	2.89057e+10	3.58342e+10	4.30495e+10	5.26509e+10	5.24435e+10	6.20167e+10	7.09988e+10	7.94577e+10	7.98559e+10	9.07401e+10	1.05497e+11	1.15117e+11	1.1946e+11	1.20547e+11	1.21417e+11	1.36512e+11	1.35002e+11	1.25332e+11	1.31409e+11	1.40048e+11	1.4752e+11
Italy	ITA	GDP (current US$)	NY.GDP.MKTP.CD	4.20124e+10	4.66495e+10	5.24139e+10	6.00359e+10	6.57208e+10	7.0717e+10	7.66224e+10	8.4402e+10	9.14854e+10	1.00997e+11	1.13657e+11	1.2496e+11	1.45595e+11	1.75897e+11	2.00024e+11	2.28221e+11	2.25235e+11	2.5819e+11	3.15784e+11	3.94585e+11	4.78357e+11	4.31696e+11	4.28257e+11	4.44063e+11	4.38897e+11	4.5326e+11	6.41862e+11	8.0757e+11	8.93664e+11	9.30802e+11	1.18395e+12	1.24909e+12	1.3232e+12	1.06741e+12	1.10175e+12	1.17737e+12	1.31478e+12	1.24499e+12	1.27273e+12	1.255e+12	1.14966e+12	1.17204e+12	1.28175e+12	1.58293e+12	1.81281e+12	1.86498e+12
Jamaica	JAM	GDP (current US$)	NY.GDP.MKTP.CD	6.99064e+08	7.48044e+08	7.77728e+08	8.26707e+08	8.97949e+08	9.7216e+08	1.09676e+09	1.14801e+09	1.08384e+09	1.19124e+09	1.40472e+09	1.53986e+09	1.87515e+09	1.90592e+09	2.37512e+09	2.86044e+09	2.96604e+09	3.24973e+09	2.64453e+09	2.42506e+09	2.67938e+09	2.97903e+09	3.2935e+09	3.61926e+09	2.37356e+09	2.10024e+09	2.75455e+09	3.28701e+09	3.82834e+09	4.40494e+09	4.59221e+09	4.10621e+09	3.53546e+09	5.44008e+09	5.45256e+09	6.57752e+09	7.39389e+09	8.40004e+09	8.7872e+09	8.88706e+09	9.00506e+09	9.19473e+09	9.71901e+09	9.43023e+09	1.01747e+10	1.12439e+10
Jordan	JOR	GDP (current US$)	NY.GDP.MKTP.CD						5.9976e+08	6.58e+08	6.3168e+08	5.6112e+08	6.9888e+08	6.3952e+08	6.7816e+08	7.8848e+08	9.43784e+08	1.19748e+09	1.36307e+09	1.70852e+09	2.09678e+09	2.60221e+09	3.27137e+09	3.91004e+09	4.38394e+09	4.68124e+09	4.92069e+09	4.96716e+09	4.9936e+09	6.40205e+09	6.75621e+09	6.27745e+09	4.22137e+09	4.16009e+09	4.34447e+09	5.31083e+09	5.6064e+09	6.2363e+09	6.7276e+09	6.9275e+09	7.24584e+09	7.91227e+09	8.14993e+09	8.46079e+09	8.97581e+09	9.58251e+09	1.01956e+10	1.14117e+10	1.2589e+10
Japan	JPN	GDP (current US$)	NY.GDP.MKTP.CD	4.74192e+10	5.72668e+10	6.49879e+10	7.43793e+10	8.74906e+10	9.73381e+10	1.13047e+11	1.32476e+11	1.56897e+11	1.84299e+11	2.17224e+11	2.45364e+11	3.24934e+11	4.41461e+11	4.90036e+11	5.32861e+11	5.98884e+11	7.37069e+11	1.03561e+12	1.07791e+12	1.12938e+12	1.24522e+12	1.15873e+12	1.27086e+12	1.34582e+12	1.42702e+12	2.12008e+12	2.58075e+12	3.12572e+12	3.10946e+12	3.1859e+12	3.64807e+12	3.9807e+12	4.53694e+12	4.9988e+12	5.54556e+12	4.92339e+12	4.49245e+12	4.09836e+12	4.63598e+12	4.96836e+12	4.37471e+12	4.18285e+12	4.51956e+12	4.89312e+12	4.83147e+12
Kazakhstan	KAZ	GDP (current US$)	NY.GDP.MKTP.CD																															2.6932e+10	2.49231e+10	2.49174e+10	2.34093e+10	2.12508e+10	2.03743e+10	2.10354e+10	2.21659e+10	2.21352e+10	1.68708e+10	1.8292e+10	2.21527e+10	2.46366e+10	3.08337e+10	4.31516e+10	5.71237e+10
Kenya	KEN	GDP (current US$)	NY.GDP.MKTP.CD	7.91265e+08	7.92959e+08	8.68111e+08	9.26589e+08	9.98759e+08	9.97919e+08	1.16452e+09	1.23256e+09	1.3533e+09	1.45838e+09	1.60345e+09	1.77839e+09	2.10728e+09	2.509e+09	2.96996e+09	3.25935e+09	3.47454e+09	4.49438e+09	5.30374e+09	6.23439e+09	7.26532e+09	6.85449e+09	6.43158e+09	5.9792e+09	6.19144e+09	6.13503e+09	7.23913e+09	7.97082e+09	8.35538e+09	8.28311e+09	8.57236e+09	8.15149e+09	8.20912e+09	5.75179e+09	7.14815e+09	9.04632e+09	1.20459e+10	1.31158e+10	1.4094e+10	1.2896e+10	1.27054e+10	1.2986e+10	1.31477e+10	1.49045e+10	1.60953e+10	1.87379e+10
Kyrgyz Republic	KGZ	GDP (current US$)	NY.GDP.MKTP.CD																															2.6602e+09	2.54226e+09	2.31535e+09	2.02602e+09	1.68178e+09	1.66115e+09	1.82757e+09	1.76786e+09	1.64596e+09	1.24906e+09	1.36969e+09	1.52512e+09	1.60564e+09	1.91901e+09	2.21153e+09	2.46025e+09
Cambodia	KHM	GDP (current US$)	NY.GDP.MKTP.CD																7.4913e+08	7.90357e+08	7.16262e+08	7.66642e+08	7.23739e+08	7.44384e+08	8.15154e+08	8.65516e+08	9.39291e+08	1.02118e+09	1.10267e+09	1.16763e+09	1.03697e+09	1.66288e+09	1.35314e+09	1.40254e+09	2.05497e+09	2.49149e+09	2.53373e+09	2.79144e+09	3.44121e+09	3.5067e+09	3.44341e+09	3.12043e+09	3.51724e+09	3.69417e+09	4.14567e+09	4.50123e+09	5.04669e+09	5.8833e+09	7.0663e+09
Kiribati	KIR	GDP (current US$)	NY.GDP.MKTP.CD											1.15609e+07	1.23561e+07	1.53143e+07	2.5645e+07	6.92565e+07	4.45475e+07	3.32468e+07	3.13355e+07	3.6564e+07	3.44662e+07	3.31577e+07	3.52675e+07	3.27427e+07	3.10005e+07	3.43942e+07	2.61266e+07	2.5993e+07	2.95544e+07	3.82788e+07	3.76453e+07	3.65343e+07	4.12478e+07	6.14914e+07	5.89536e+07	6.70553e+07	6.85964e+07	8.14569e+07	8.02058e+07	7.49057e+07	7.7324e+07	7.49105e+07	6.49359e+07	7.47439e+07	9.61056e+07	1.04086e+08	1.13895e+08
St. Kitts and Nevis	KNA	GDP (current US$)	NY.GDP.MKTP.CD	1.23666e+07	1.24833e+07	1.25416e+07	1.28333e+07	1.34166e+07	1.35939e+07	1.44691e+07	1.67423e+07	14600000	15850000	16300000	1.96247e+07	2.29448e+07	2.4196e+07	3.15149e+07	3.33641e+07	3.00956e+07	4.44963e+07	4.94333e+07	5.88407e+07	6.84593e+07	8.08889e+07	8.60222e+07	8.68741e+07	9.86037e+07	1.11007e+08	1.30685e+08	1.47748e+08	1.72693e+08	1.92519e+08	2.17259e+08	2.20541e+08	2.42137e+08	2.63756e+08	2.95159e+08	3.13485e+08	3.33944e+08	3.74641e+08	3.83257e+08	4.06595e+08	4.21696e+08	4.58644e+08	4.81077e+08	4.6987e+08	506900000	5.47204e+08
Korea, Rep.	KOR	GDP (current US$)	NY.GDP.MKTP.CD	3.97307e+09	2.42724e+09	2.82692e+09	4.00769e+09	3.47679e+09	3.14113e+09	3.95706e+09	4.89508e+09	6.16711e+09	7.74394e+09	9.085e+09	1.00053e+10	1.09905e+10	1.40675e+10	1.98609e+10	2.2126e+10	3.03711e+10	3.90645e+10	5.28248e+10	6.80839e+10	6.6548e+10	7.42874e+10	7.99213e+10	8.96212e+10	9.97496e+10	1.03764e+11	1.19966e+11	1.5224e+11	2.05478e+11	2.54236e+11	2.92064e+11	3.40852e+11	3.66921e+11	4.05705e+11	4.79182e+11	5.86286e+11	6.31197e+11	5.89203e+11	3.97297e+11	5.15697e+11	5.97487e+11	5.67565e+11	6.50014e+11	7.28516e+11	8.23251e+11	9.7174e+11
Kuwait	KWT	GDP (current US$)	NY.GDP.MKTP.CD			1.82811e+09	1.9009e+09	2.07167e+09	2.0972e+09	2.3912e+09	2.4416e+09	2.6628e+09	2.7692e+09	2.87364e+09	3.88039e+09	4.45054e+09	5.4088e+09	1.30069e+10	1.20228e+10	1.31323e+10	1.41374e+10	1.55036e+10	2.47491e+10	2.86389e+10	2.5058e+10	2.15772e+10	2.08711e+10	2.17001e+10	2.1446e+10	1.7904e+10	2.23687e+10	2.06903e+10	2.43139e+10	1.84278e+10	1.101e+10	1.98586e+10	2.39414e+10	2.48485e+10	2.7187e+10	3.14924e+10	3.03502e+10	2.59437e+10	3.01224e+10	3.77187e+10	3.48896e+10	3.81358e+10	4.78746e+10	5.94391e+10	8.07986e+10
Latin America & Caribbean (excluding high income)	LAC	GDP (current US$)	NY.GDP.MKTP.CD	6.1872e+10	6.85374e+10	7.08381e+10	7.78523e+10	8.92671e+10	9.67736e+10	1.06986e+11	1.08803e+11	1.17082e+11	1.31184e+11	1.42597e+11	1.57897e+11	1.7959e+11	2.40396e+11	3.16078e+11	3.40736e+11	3.70758e+11	4.0197e+11	4.87097e+11	5.35635e+11	6.47345e+11	7.43689e+11	6.85785e+11	5.9164e+11	6.34822e+11	6.2454e+11	6.32752e+11	6.935e+11	7.54391e+11	8.57639e+11	9.56359e+11	1.0223e+12	1.10966e+12	1.3379e+12	1.58189e+12	1.68561e+12	1.84098e+12	2.00912e+12	2.02492e+12	1.79596e+12	1.98649e+12	1.9355e+12	1.74055e+12	1.77671e+12	2.02511e+12	2.45049e+12
Lao PDR	LAO	GDP (current US$)	NY.GDP.MKTP.CD																									1.75714e+09	2.36667e+09	1.77684e+09	1.08727e+09	5.98961e+08	7.14047e+08	8.6556e+08	1.02809e+09	1.12781e+09	1.32775e+09	1.54361e+09	1.76354e+09	1.87367e+09	1.74701e+09	1.28018e+09	1.45443e+09	1.7312e+09	1.76862e+09	1.75818e+09	2.02332e+09	2.3664e+09	2.73556e+09
Lebanon	LBN	GDP (current US$)	NY.GDP.MKTP.CD																													3.31354e+09	2.718e+09	2.83849e+09	4.69042e+09	5.84358e+09	7.94174e+09	9.59913e+09	1.17188e+10	1.36902e+10	1.57519e+10	1.72472e+10	1.73911e+10	1.72604e+10	1.76498e+10	1.91522e+10	2.00829e+10	2.11598e+10	2.14973e+10
Liberia	LBR	GDP (current US$)	NY.GDP.MKTP.CD	190495600	183920900	191861800	200229600	218929100	229260800	244459500	261024300	276820700	306961800	323099700	341543100	368098000	386968300	486955000	577549300	596675700	673010600	717240400	814067900	854711500	846514500	863933200	823374900	848478300	851296100	840964400	972800000	1038300000	786300000	384400000	348000000	223500000	160400000	132200000	134800000	159400000	295900000	359600000	441800000	874000000	906000000	927000000	748000000	897000000	949000000
Libya	LBY	GDP (current US$)	NY.GDP.MKTP.CD	4.01644e+08	4.43906e+08	6.19726e+08	8.92328e+08	1.3414e+09	1.80498e+09	2.31244e+09	2.72699e+09	3.85062e+09	4.38099e+09	4.60165e+09	5.26019e+09	6.2994e+09	8.62589e+09	1.51125e+10	1.47109e+10	1.90969e+10	2.24283e+10	2.21364e+10	3.05364e+10	4.09539e+10	3.63744e+10	3.37601e+10	3.32005e+10	2.94761e+10	3.15306e+10	2.41804e+10	2.66977e+10	2.4309e+10	2.51567e+10	2.89042e+10	3.19918e+10	3.3887e+10	3.06601e+10	2.86105e+10	2.55414e+10	2.78846e+10	3.07009e+10	2.72513e+10	3.59759e+10	3.8271e+10	3.41121e+10	2.04819e+10	26265625000	3.31223e+10	4.73347e+10
St. Lucia	LCA	GDP (current US$)	NY.GDP.MKTP.CD																					1.7037e+08	1.94444e+08	1.83333e+08	1.97037e+08	2.51481e+08	2.84444e+08	340000000	3.75556e+08	4.2963e+08	4.86667e+08	5.7963e+08	6.13704e+08	6.74074e+08	6.84815e+08	7.13704e+08	7.62963e+08	7.88889e+08	8.05926e+08	8.77407e+08	9.21852e+08	9.32593e+08	8.92593e+08	900000000	9.87407e+08	1.06667e+09	1.13556e+09
Latin America & Caribbean	LCN	GDP (current US$)	NY.GDP.MKTP.CD	7.92189e+10	8.76926e+10	9.21487e+10	1.00158e+11	1.11298e+11	1.19598e+11	1.31679e+11	1.34312e+11	1.44144e+11	1.60995e+11	1.75638e+11	1.95901e+11	2.20381e+11	2.9315e+11	3.79786e+11	3.98145e+11	4.36628e+11	4.79581e+11	5.74059e+11	6.44166e+11	7.83357e+11	8.94809e+11	8.23243e+11	7.26364e+11	7.64197e+11	7.55578e+11	7.65106e+11	8.21071e+11	9.00612e+11	9.94557e+11	1.10744e+12	1.18941e+12	1.29909e+12	1.53713e+12	1.79577e+12	1.94235e+12	2.10095e+12	2.30367e+12	2.33197e+12	2.10767e+12	2.32696e+12	2.28262e+12	2.05279e+12	2.0919e+12	2.40547e+12	2.90323e+12
Least developed countries: UN classification	LDC	GDP (current US$)	NY.GDP.MKTP.CD	2.80838e+10	2.93646e+10	3.1795e+10	3.65193e+10	3.31502e+10	3.72952e+10	4.06422e+10	4.13116e+10	4.40983e+10	4.87885e+10	4.72181e+10	4.96077e+10	5.13058e+10	6.24372e+10	7.77698e+10	9.36351e+10	8.62579e+10	9.49418e+10	1.11734e+11	1.22428e+11	1.35711e+11	1.38756e+11	1.40165e+11	1.38441e+11	1.40662e+11	1.53685e+11	1.33833e+11	1.42313e+11	1.56209e+11	1.67639e+11	1.92677e+11	2.08818e+11	1.65223e+11	1.71011e+11	1.67739e+11	1.72091e+11	1.81565e+11	1.8934e+11	1.9221e+11	1.97805e+11	2.24564e+11	2.16586e+11	2.38997e+11	2.70939e+11	3.11792e+11	3.70633e+11
Low income	LIC	GDP (current US$)	NY.GDP.MKTP.CD								1.71686e+10	1.86435e+10	2.1688e+10	2.21386e+10	2.46785e+10	2.76153e+10	3.30226e+10	4.13176e+10	4.88588e+10	5.13534e+10	5.94696e+10	6.93262e+10	7.33615e+10	8.22399e+10	8.35766e+10	8.36873e+10	7.98831e+10	7.85816e+10	7.37559e+10	7.76996e+10	8.16995e+10	8.85526e+10	9.585e+10	1.20058e+11	1.3441e+11	9.26861e+10	1.02326e+11	9.71147e+10	8.88054e+10	8.48392e+10	9.08856e+10	9.30886e+10	9.37863e+10	1.16766e+11	1.09983e+11	1.22332e+11	1.36843e+11	1.59851e+11	1.93442e+11
Liechtenstein	LIE	GDP (current US$)	NY.GDP.MKTP.CD											9.00994e+07	1.0489e+08	1.2494e+08	1.65929e+08	1.9398e+08	2.46389e+08	2.72489e+08	3.03493e+08	4.36912e+08	5.03173e+08	5.34699e+08	5.11648e+08	5.22097e+08	5.24024e+08	5.02621e+08	5.29074e+08	7.79358e+08	1.05285e+09	1.16176e+09	1.11998e+09	1.42151e+09	1.48416e+09	1.63118e+09	1.67309e+09	1.94813e+09	2.42853e+09	2.50401e+09	2.29839e+09	2.4797e+09	2.66411e+09	2.48389e+09	2.4918e+09	2.68862e+09	3.0708e+09	3.45437e+09	3.65932e+09
Sri Lanka	LKA	GDP (current US$)	NY.GDP.MKTP.CD	1.40987e+09	1.44433e+09	1.43416e+09	1.24067e+09	1.30975e+09	1.69832e+09	1.75147e+09	1.85947e+09	1.80134e+09	1.96555e+09	2.29647e+09	2.36931e+09	2.55394e+09	2875625000	3.57459e+09	3.7913e+09	3.59132e+09	4.10451e+09	2.73318e+09	3.36461e+09	4.02462e+09	4.41584e+09	4.76877e+09	5.16791e+09	6.04347e+09	5.97846e+09	6.40521e+09	6.68217e+09	6.97837e+09	6.98727e+09	8.03255e+09	9.00036e+09	9.70301e+09	1.03387e+10	1.17176e+10	1.30297e+10	1.38977e+10	1.50919e+10	1.57607e+10	1.57119e+10	1.65959e+10	1.57498e+10	1.65365e+10	1.88818e+10	2.06625e+10	2.44058e+10
Lower middle income	LMC	GDP (current US$)	NY.GDP.MKTP.CD	8.57186e+10	9.13756e+10	9.27915e+10	1.02655e+11	1.15346e+11	1.23582e+11	1.12804e+11	1.20385e+11	1.27756e+11	1.41435e+11	1.53169e+11	1.59557e+11	1.70264e+11	2.00259e+11	2.47656e+11	2.71279e+11	2.86868e+11	3.22288e+11	3.63479e+11	4.21417e+11	5.13986e+11	6.37968e+11	6.33607e+11	6.00666e+11	5.76332e+11	6.15045e+11	6.17956e+11	6.73707e+11	6.95226e+11	6.80923e+11	7.40239e+11	7.08795e+11	7.40204e+11	7.48821e+11	8.42207e+11	1.00004e+12	1.13914e+12	1.19524e+12	1.22056e+12	1.12587e+12	1.1889e+12	1.2008e+12	1.26865e+12	1.44054e+12	1.65863e+12	1.91123e+12
Low & middle income	LMY	GDP (current US$)	NY.GDP.MKTP.CD	2.66021e+11	2.69459e+11	2.73696e+11	3.03551e+11	3.4015e+11	3.75606e+11	3.89671e+11	3.99982e+11	4.24044e+11	4.74511e+11	5.17799e+11	5.56846e+11	6.25485e+11	7.97479e+11	1.0152e+12	1.123e+12	1.20828e+12	1.35651e+12	1.5062e+12	1.74617e+12	2.06317e+12	2.31048e+12	2.27777e+12	2.20682e+12	2.26746e+12	2.35453e+12	2.40456e+12	2.48214e+12	2.64857e+12	2.83949e+12	3.26349e+12	3.16938e+12	3.32567e+12	3.59896e+12	4.03635e+12	4678566130116	5.19425e+12	5.51448e+12	5.4156e+12	5.21358e+12	5.67124e+12	5.68186e+12	5.79657e+12	6.49014e+12	7.61557e+12	8.99572e+12
Lesotho	LSO	GDP (current US$)	NY.GDP.MKTP.CD	3.458e+07	3.57e+07	4.186e+07	4.704e+07	5.194e+07	5.488e+07	5.67e+07	5.9262e+07	6.1446e+07	6.5968e+07	6.874e+07	7.64803e+07	8.09132e+07	1.21189e+08	1.50851e+08	1.49559e+08	1.4766e+08	1.93315e+08	2.6657e+08	2.90135e+08	4.31543e+08	4.34188e+08	3.48742e+08	3.86699e+08	3.33164e+08	2.6863e+08	3.18858e+08	4.02768e+08	4.70396e+08	4.95409e+08	5.9641e+08	7.04325e+08	8.3103e+08	8.35582e+08	8.78251e+08	1.00189e+09	9.46112e+08	9.98004e+08	9.28461e+08	9.12774e+08	8.87292e+08	8.25707e+08	7.75777e+08	1.15783e+09	1.51124e+09	1.68234e+09
Late-demographic dividend	LTE	GDP (current US$)	NY.GDP.MKTP.CD	1.83859e+11	1.70881e+11	1.74095e+11	1.89932e+11	2.08297e+11	2.33447e+11	2.59994e+11	2.6126e+11	2.65793e+11	2.96284e+11	3.36905e+11	3.74774e+11	4.31342e+11	5.60343e+11	6.73222e+11	7.43237e+11	8.01479e+11	9.29936e+11	9.67903e+11	1.15236e+12	1.3215e+12	1.38513e+12	1.39723e+12	1.2935e+12	1.35006e+12	1.4594e+12	1.551e+12	1.63776e+12	1.78702e+12	1.90524e+12	1.9711e+12	1.98236e+12	2.02184e+12	2.10491e+12	2.4446e+12	3.02978e+12	3.34147e+12	3.49956e+12	3.37487e+12	3.12222e+12	3.42751e+12	3.54554e+12	3.76083e+12	4.28665e+12	5.15193e+12	6.21102e+12
Lithuania	LTU	GDP (current US$)	NY.GDP.MKTP.CD																																				7.92121e+09	8.43021e+09	1.01683e+10	1.12892e+10	1.10221e+10	1.15507e+10	1.22608e+10	1.42823e+10	1.88092e+10	2.27432e+10	2.61052e+10
Luxembourg	LUX	GDP (current US$)	NY.GDP.MKTP.CD	7.09942e+08	7.10164e+08	7.47847e+08	7.97902e+08	9.10878e+08	9.29477e+08	9.76717e+08	9.83052e+08	1.07556e+09	1.24543e+09	1.45777e+09	1.51877e+09	1.9017e+09	2.60988e+09	3.18364e+09	3.12333e+09	3.42359e+09	3.78932e+09	4.71854e+09	5.51698e+09	6.01981e+09	5.05367e+09	4.60232e+09	4.52422e+09	4.43844e+09	4.57721e+09	6.6856e+09	8.3209e+09	9.41817e+09	1.00377e+10	1.27788e+10	1.38342e+10	1.55187e+10	1.59255e+10	1.77018e+10	2.08531e+10	2.08953e+10	1.95638e+10	2.01501e+10	2.18993e+10	2.12302e+10	2.13875e+10	2.36498e+10	2.96673e+10	3.50648e+10	3.76723e+10
Latvia	LVA	GDP (current US$)	NY.GDP.MKTP.CD																																				5.60821e+09	5.79947e+09	6.34948e+09	6.97411e+09	7.32419e+09	7.76125e+09	8.19089e+09	9.24903e+09	1.12443e+10	1.38271e+10	1.63069e+10
Macao SAR, China	MAC	GDP (current US$)	NY.GDP.MKTP.CD																							1.1425e+09	1.13301e+09	1.30436e+09	1.36207e+09	1.53211e+09	1.95772e+09	2.28876e+09	2.70567e+09	3.24648e+09	3.76525e+09	4.91437e+09	5.66561e+09	6.31121e+09	7.04615e+09	7.17689e+09	7.26757e+09	6.79691e+09	6.54717e+09	6.77394e+09	6.86027e+09	7.37169e+09	8.24648e+09	1.06433e+10	1.21601e+10
St. Martin (French part)	MAF	GDP (current US$)	NY.GDP.MKTP.CD
Morocco	MAR	GDP (current US$)	NY.GDP.MKTP.CD	2.03715e+09	2.02569e+09	2.37961e+09	2.65725e+09	2.79835e+09	2.94833e+09	2.8764e+09	3.04635e+09	3.27142e+09	3.65162e+09	3.95634e+09	4.35667e+09	5.07412e+09	6.24215e+09	7.67547e+09	8.98485e+09	9.5843e+09	1.10498e+10	1.32369e+10	1.5912e+10	2.17285e+10	1.77882e+10	1.76923e+10	1.62514e+10	1.48247e+10	1.49913e+10	1.94621e+10	2.17652e+10	2.57053e+10	2.63143e+10	3.018e+10	3.22856e+10	3.37111e+10	3.16555e+10	3.56041e+10	3.90303e+10	4.31616e+10	3.91478e+10	4.64976e+10	4.62664e+10	4.30175e+10	4.38315e+10	4.70772e+10	5.80294e+10	6.61141e+10	6.88527e+10
Monaco	MCO	GDP (current US$)	NY.GDP.MKTP.CD											2.93127e+08	3.27706e+08	4.02452e+08	5.23554e+08	5.63949e+08	7.11979e+08	7.35324e+08	8.11191e+08	1.00056e+09	1.20987e+09	1.37818e+09	1.20519e+09	1.14322e+09	1.09256e+09	1.03733e+09	1.08287e+09	1.51523e+09	1.83908e+09	2.0007e+09	2.01008e+09	2.48131e+09	2.48054e+09	2.73705e+09	2.57449e+09	2.72033e+09	3.13031e+09	3.13789e+09	2.8402e+09	2.93459e+09	2.90712e+09	2.65446e+09	2.67372e+09	2.91965e+09	3.59709e+09	4.04355e+09	4.20465e+09
Moldova	MDA	GDP (current US$)	NY.GDP.MKTP.CD																															3.59286e+09	3.09457e+09	2.31924e+09	2.37181e+09	1.70231e+09	1.753e+09	1.69512e+09	1.93008e+09	1.69872e+09	1.17078e+09	1.28843e+09	1.48067e+09	1.66182e+09	1.98091e+09	2.59825e+09	2.98834e+09
Madagascar	MDG	GDP (current US$)	NY.GDP.MKTP.CD	6.73082e+08	6.99162e+08	7.39287e+08	7.59346e+08	8.02482e+08	8.33563e+08	9.00265e+08	9.56437e+08	1.03167e+09	1.05639e+09	1.11186e+09	1.19951e+09	1.34159e+09	1.65306e+09	1.91751e+09	2.28305e+09	2.18184e+09	2.35893e+09	2.66976e+09	3.46357e+09	5.20182e+09	4.75933e+09	4.78498e+09	4.68646e+09	3.90594e+09	3.80256e+09	4.34799e+09	3.2129e+09	3.18946e+09	3.17564e+09	3.93133e+09	3.25471e+09	3.71497e+09	4.0633e+09	3.52223e+09	3.8381e+09	4.93186e+09	4.26297e+09	4.40197e+09	4.2779e+09	4.62925e+09	5.43833e+09	5.3517e+09	6.3725e+09	5.06473e+09	5.85927e+09
Maldives	MDV	GDP (current US$)	NY.GDP.MKTP.CD											1.9328e+07	2.15664e+07	2.51771e+07	3.0862e+07	3.91202e+07	2.45409e+07	2.23995e+07	2.08538e+07	2.43691e+07	3.85234e+07	4.24636e+07	4.47815e+07	4.79113e+07	5.78298e+07	1.09504e+08	1.27191e+08	1.41882e+08	1.41223e+08	1.68515e+08	1.89514e+08	2.15044e+08	2.44397e+08	2.84876e+08	3.22418e+08	3.56015e+08	3.98989e+08	4.50382e+08	5.08224e+08	5.40096e+08	5.8924e+08	6.24337e+08	8.70032e+08	897031250	1.05212e+09	1.22683e+09	1.16336e+09
Middle East, North Africa, Afghanistan & Pakistan	MEA	GDP (current US$)	NY.GDP.MKTP.CD	2.90244e+10	3.0987e+10	3.08325e+10	3.3981e+10	3.78765e+10	4.16526e+10	4.48277e+10	4.87027e+10	5.53551e+10	6.14491e+10	6.94705e+10	7.9185e+10	9.32969e+10	1.21487e+11	2.20686e+11	2.4255e+11	3.0131e+11	3.49602e+11	3.71543e+11	4.83141e+11	6.21242e+11	6.40119e+11	6.41806e+11	6.49495e+11	6.56415e+11	6.68194e+11	6.76559e+11	6.31785e+11	6.31605e+11	6.5116e+11	8.36906e+11	6.73739e+11	7.11056e+11	6.66712e+11	7.03469e+11	7.79385e+11	8.63e+11	9.00774e+11	8.82028e+11	9.5473e+11	1.09876e+12	1.09055e+12	1.08428e+12	1.20892e+12	1.42516e+12	1.69692e+12
Mexico	MEX	GDP (current US$)	NY.GDP.MKTP.CD	13040000000	14160000000	15200000000	16960000000	20080000000	21840000000	24320000000	26560000000	29360000000	32480000000	35520000000	39200000000	45200000000	55280000000	72000000000	88000000000	8.88759e+10	8.1912e+10	1.02649e+11	1.34532e+11	2.05577e+11	2.63798e+11	1.84603e+11	1.56167e+11	1.84231e+11	1.95241e+11	1.34556e+11	1.47543e+11	1.81611e+11	2.21403e+11	2.61254e+11	3.1314e+11	3.63158e+11	5.30161e+11	5.53618e+11	3.80157e+11	4.32158e+11	5.2345e+11	5.57461e+11	6.31249e+11	7.42061e+11	7.96065e+11	8.10666e+11	7.6555e+11	8.19459e+11	9.17572e+11
Marshall Islands	MHL	GDP (current US$)	NY.GDP.MKTP.CD											8408486	9116810	9973652	11607366	15217532	16691301	18153647	20210069	22209370	25545346	26710653	31020000	34918000	41749000	45144000	43879000	55989000	62983000	70688000	72798000	78476000	82507000	91063000	99461000	108071000	120230000	110858000	109884700	112070100	113352100	114838500	122406100	131960000	131128500	132900000	138000000
Middle income	MIC	GDP (current US$)	NY.GDP.MKTP.CD	2.54381e+11	2.57716e+11	2.60605e+11	2.8712e+11	3.26749e+11	3.59974e+11	3.73234e+11	3.84168e+11	4.06933e+11	4.5472e+11	4.97395e+11	5.34228e+11	6.00161e+11	7.66887e+11	9.76816e+11	1.0781e+12	1.1609e+12	1.30192e+12	1.44303e+12	1.67836e+12	1.98649e+12	2.23137e+12	2.19875e+12	2.13122e+12	2.19255e+12	2.28296e+12	2.3296e+12	2.40358e+12	2.5637e+12	2.74781e+12	3.15062e+12	3.04471e+12	3.23711e+12	3.50135e+12	3.94238e+12	4.59053e+12	5.10855e+12	5.42278e+12	5.32219e+12	5.12001e+12	5.55655e+12	5.57329e+12	5.67664e+12	6.35597e+12	7.45879e+12	8.80634e+12
North Macedonia	MKD	GDP (current US$)	NY.GDP.MKTP.CD																															4.69965e+09	4.93878e+09	2.43685e+09	2.68246e+09	3.55961e+09	4.70704e+09	4.64202e+09	3.91299e+09	3.76575e+09	3.86362e+09	3.77286e+09	3.70964e+09	4.01837e+09	4.9463e+09	5.68278e+09	6.2586e+09
Mali	MLI	GDP (current US$)	NY.GDP.MKTP.CD								2.75494e+08	3.43772e+08	3.39914e+08	3.59772e+08	3.95219e+08	4.86617e+08	5.63684e+08	5.38747e+08	8.30711e+08	9.39228e+08	1.04984e+09	1.2227e+09	1.59542e+09	2.70436e+09	2.23458e+09	1.6803e+09	1.49662e+09	1.38781e+09	1.59435e+09	2.13294e+09	2.437e+09	2.71221e+09	2.82482e+09	3.24842e+09	3.57656e+09	3.68078e+09	3.6328e+09	2.65577e+09	3.37332e+09	3.7431e+09	3.41488e+09	3.89443e+09	4.09145e+09	3.52157e+09	4.12428e+09	4.64724e+09	5.60561e+09	6.48577e+09	7.42907e+09
Malta	MLT	GDP (current US$)	NY.GDP.MKTP.CD											2.50729e+08	2.64578e+08	2.95107e+08	3.45616e+08	3.76081e+08	4.74618e+08	5.27937e+08	6.25563e+08	7.93673e+08	1.00129e+09	1.2502e+09	1.24351e+09	1.23447e+09	1.16573e+09	1.10181e+09	1.1178e+09	1.43504e+09	1.75129e+09	2.0195e+09	2.11866e+09	2.54733e+09	2.75022e+09	3.02194e+09	2.70919e+09	2.99851e+09	3.7094e+09	3.82255e+09	3.78702e+09	4.01011e+09	4.11186e+09	4.03681e+09	4.07087e+09	4.45513e+09	5.41832e+09	6.10414e+09	6.39323e+09
Myanmar	MMR	GDP (current US$)	NY.GDP.MKTP.CD	5.45098e+08	6.05582e+08	6.34529e+08	5.98998e+08	4.1142e+08	3.67053e+08	2.93103e+08	4.20359e+08	5.59956e+08	5.71854e+08	5.63556e+08	5.87448e+08	6.62213e+08	7.19755e+08	1.22559e+09	1.06111e+09	1.2047e+09	8.7358e+08	9.35409e+08	9.52265e+08	1.03823e+09	1.111e+09	1.48117e+09	1.38157e+09	1.30406e+09	1.47891e+09	1.58287e+09	1.56245e+09	1.54109e+09	2.01345e+09	2.11519e+09	2.06983e+09	2.41155e+09	3.16302e+09	4.43226e+09	5.28917e+09	6.12356e+09	4.72229e+09	6.45946e+09	8.48683e+09	8.90507e+09	6.47779e+09	6.77763e+09	1.04671e+10	1.05674e+10	1.1987e+10
Middle East, North Africa, Afghanistan & Pakistan (excluding high income)	MNA	GDP (current US$)	NY.GDP.MKTP.CD	2.19515e+10	2.28977e+10	2.33111e+10	2.56807e+10	2.86862e+10	3.18053e+10	3.39692e+10	3.73101e+10	4.18971e+10	4.65943e+10	5.23407e+10	5.92034e+10	6.72569e+10	8.29483e+10	1.27536e+11	1.46512e+11	1.80748e+11	2.08782e+11	2.24124e+11	2.7863e+11	3.38338e+11	3.30378e+11	3.69224e+11	4.04172e+11	4.22202e+11	4.53639e+11	4.87667e+11	4.26965e+11	4.14054e+11	4.15824e+11	5.61877e+11	3.80581e+11	3.90454e+11	3.44284e+11	3.61934e+11	4.03355e+11	4.46894e+11	4.6577e+11	4.7582e+11	5.15244e+11	5.77555e+11	5.80414e+11	5.64912e+11	6.2472e+11	7.39741e+11	8.57125e+11
Montenegro	MNE	GDP (current US$)	NY.GDP.MKTP.CD																																						8.38289e+08	8.54261e+08	8.2895e+08	9.84293e+08	1.15987e+09	1.28469e+09	1.70771e+09	2.07323e+09	2.25717e+09
Mongolia	MNG	GDP (current US$)	NY.GDP.MKTP.CD																					2101394100	2310099100	2.5524e+09	2.72574e+09	2098734600	2186505475	2.89618e+09	3020611600	3.20446e+09	3576966800	2560785660	2.37902e+09	1.31761e+09	7.68402e+08	9.25817e+08	1.45217e+09	1.34572e+09	1.18093e+09	1.12444e+09	1.05741e+09	1.1369e+09	1.268e+09	1.39656e+09	1.5953e+09	1.99207e+09	2.52347e+09
Northern Mariana Islands	MNP	GDP (current US$)	NY.GDP.MKTP.CD																																											1284000000	1239000000	1210000000	1061000000
Mozambique	MOZ	GDP (current US$)	NY.GDP.MKTP.CD																																3.85486e+09	2.7987e+09	2.88316e+09	2.95811e+09	3.06165e+09	4.03015e+09	4.87366e+09	5.55112e+09	6.28522e+09	5.93069e+09	5.65015e+09	5.95077e+09	6.58353e+09	7.93726e+09	8.8685e+09
Mauritania	MRT	GDP (current US$)	NY.GDP.MKTP.CD		1.59213e+08	1.64272e+08	1.68186e+08	2.24496e+08	2.5534e+08	2.66534e+08	2.82615e+08	3.11396e+08	2.95062e+08	3.09405e+08	3.35569e+08	3.91669e+08	4.93238e+08	6.13011e+08	7.03378e+08	7.75046e+08	7.9903e+08	8.0463e+08	9.51901e+08	1.04793e+09	1.10549e+09	1.10878e+09	1.16517e+09	1.07437e+09	1.00972e+09	1.18663e+09	1.34466e+09	1.41495e+09	1.45065e+09	1.50691e+09	2.13369e+09	2.1643e+09	1.84735e+09	1.94488e+09	2.09173e+09	2.13209e+09	2.072e+09	2.03235e+09	1.98592e+09	1.77952e+09	1.74606e+09	1.77706e+09	2.05115e+09	2.3625e+09	2.93602e+09
Mauritius	MUS	GDP (current US$)	NY.GDP.MKTP.CD	1.6209e+08	1.91758e+08	1.97738e+08	2.5384e+08	2.18915e+08	2.30024e+08	2.27534e+08	2.38439e+08	2.06577e+08	2.21554e+08	2.24126e+08	2.51437e+08	3.18665e+08	4.04286e+08	6.69894e+08	6.73311e+08	7.1351e+08	8.34723e+08	1.02904e+09	1.22745e+09	1.14703e+09	1.15777e+09	1.09292e+09	1.10496e+09	1.05456e+09	1.09061e+09	1.4826e+09	1.90617e+09	2.16325e+09	2.21131e+09	2.68921e+09	2.89535e+09	3.26768e+09	3.3073e+09	3.60605e+09	4.09474e+09	4.48149e+09	4.24376e+09	4.22581e+09	4.40219e+09	4.72611e+09	4.67576e+09	4.90649e+09	5.89487e+09	6.66742e+09	6.57611e+09
Malawi	MWI	GDP (current US$)	NY.GDP.MKTP.CD																					1.80116e+09	1.80119e+09	1.71738e+09	1.78015e+09	1.75803e+09	1.64644e+09	1.72259e+09	1.72171e+09	2.00819e+09	2.31421e+09	2.73709e+09	3.20678e+09	2.61884e+09	3.01339e+09	1.71986e+09	2.0337e+09	3.31957e+09	3.87579e+09	2.54761e+09	2.58448e+09	2.53731e+09	2.49801e+09	5.08733e+09	4.66979e+09	5.05873e+09	5.32041e+09
Malaysia	MYS	GDP (current US$)	NY.GDP.MKTP.CD	1.91623e+09	1.90186e+09	2.00149e+09	2.51011e+09	2.67442e+09	2.95634e+09	3.14352e+09	3.18892e+09	3.33037e+09	3.66455e+09	3.86415e+09	4.2444e+09	5.04335e+09	7.6629e+09	9.4962e+09	9.2988e+09	1.10502e+10	1.31395e+10	1.63581e+10	2.12133e+10	2.44882e+10	2.50043e+10	2.68045e+10	3.03474e+10	3.39429e+10	3.11996e+10	2.77341e+10	3.21812e+10	3.52721e+10	3.8848e+10	4.40246e+10	4.91431e+10	5.91676e+10	6.6895e+10	7.44784e+10	8.87053e+10	1.00855e+11	1.00005e+11	7.21675e+10	7.91484e+10	9.37897e+10	9.27839e+10	1.00846e+11	1.10202e+11	1.24749e+11	1.43534e+11
North America	NAC	GDP (current US$)	NY.GDP.MKTP.CD	5.82625e+11	6.03055e+11	6.46056e+11	6.82281e+11	7.3374e+11	7.96652e+11	8.744e+11	9.25612e+11	1.01242e+12	1.09701e+12	1.16168e+12	1.26467e+12	1.39281e+12	1.55741e+12	1.7065e+12	1.85967e+12	2.08107e+12	2.2946e+12	2.57144e+12	2.87174e+12	3.1327e+12	3.51503e+12	3.65922e+12	3.97679e+12	4.39532e+12	4.7062e+12	4.95981e+12	5.28965e+12	5.74723e+12	6.21029e+12	6.56081e+12	6.77229e+12	7.11639e+12	7.43943e+12	7.86905e+12	8.24774e+12	8.70643e+12	9.23547e+12	9699948950000	1.03129e+13	1.09992e+13	1.13246e+13	11693699517098	1.23562e+13	1.32484e+13	1.42172e+13
Namibia	NAM	GDP (current US$)	NY.GDP.MKTP.CD																					2.42199e+09	2.24991e+09	2.11871e+09	2.2974e+09	1.95126e+09	1.60824e+09	1.80905e+09	2.30007e+09	2.49509e+09	2.53514e+09	2.78992e+09	2.99687e+09	3.42952e+09	3.25119e+09	3.6665e+09	3.97851e+09	3.98916e+09	4.15499e+09	3.87311e+09	3.86855e+09	3.92223e+09	3.55734e+09	3.34917e+09	4.92644e+09	6.60921e+09	7.24837e+09
New Caledonia	NCL	GDP (current US$)	NY.GDP.MKTP.CD						1.59594e+08	1.64207e+08	1.80037e+08	2.15507e+08	2.63109e+08	3.58816e+08	4.13986e+08	5.06809e+08	5.42293e+08	6.37403e+08	8.16652e+08	7.98314e+08	8.3762e+08	8.46005e+08	1.04723e+09	1.18246e+09	9.72564e+08	9.046e+08	8.23858e+08	7.96066e+08	8.54821e+08	1.20132e+09	1.48809e+09	2.07278e+09	2.18508e+09	2.52944e+09	2.65378e+09	2.92388e+09	2.82224e+09	3.03873e+09	3.62844e+09	3.60697e+09	3.29113e+09	3.5563e+09	3.6478e+09	3.42003e+09	3.29773e+09	3.74006e+09	4.91535e+09	5.89501e+09	6.23863e+09
Niger	NER	GDP (current US$)	NY.GDP.MKTP.CD	4.49527e+08	4.85785e+08	5.31737e+08	5.86295e+08	5.82816e+08	6.73384e+08	7.02296e+08	6.65587e+08	6.41214e+08	6.25868e+08	6.49917e+08	6.93574e+08	7.4278e+08	9.46385e+08	1.02614e+09	1.04869e+09	1.06452e+09	1.29146e+09	1.77437e+09	2.10928e+09	2.50852e+09	2.17089e+09	2.01761e+09	1.8031e+09	1.46124e+09	1.44058e+09	1.9041e+09	2.23301e+09	2.28036e+09	2.17957e+09	3.51236e+09	3.2858e+09	3.38623e+09	3.05267e+09	1.93806e+09	2.30254e+09	2.40569e+09	2.29032e+09	2.64336e+09	2.53779e+09	2.24175e+09	2.44871e+09	2.78219e+09	3.39408e+09	3.76044e+09	4.38332e+09
Nigeria	NGA	GDP (current US$)	NY.GDP.MKTP.CD	4.19617e+09	4.46729e+09	4.9094e+09	5.16559e+09	5.55293e+09	5.87454e+09	6.36692e+09	5.20324e+09	5.201e+09	6.63432e+09	1.25461e+10	9.18177e+09	1.22744e+10	1.51629e+10	2.48466e+10	2.77789e+10	3.63089e+10	3.60354e+10	3.65279e+10	4.72599e+10	6.42018e+10	1.64475e+11	1.42769e+11	9.70949e+10	7.34844e+10	7.37458e+10	5.48059e+10	5.2676e+10	4.96485e+10	4.40031e+10	5.40358e+10	5.95268e+10	5.20582e+10	5.67211e+10	8.03996e+10	1.4092e+11	185730236700	2.0085e+11	2.18416e+11	5.91451e+10	6.91715e+10	7.35578e+10	9.50541e+10	1.04739e+11	1.35765e+11	1.75671e+11
Nicaragua	NIC	GDP (current US$)	NY.GDP.MKTP.CD	2.27223e+08	2.44144e+08	2.69284e+08	2.97324e+08	3.4712e+08	5.6429e+08	6.0714e+08	6.5714e+08	6.9286e+08	7.5e+08	7.7857e+08	8.2857e+08	8.7857e+08	1.0929e+09	1.5214e+09	1.5816e+09	1.8369e+09	2.227e+09	2.1277e+09	1.5676e+09	2.1443e+09	2.4747e+09	2.4545e+09	2.7531e+09	3.1176e+09	2.6837e+09	2.8858e+09	3.8512e+09	2.6309e+09	1.01318e+09	1.00946e+09	1.4888e+09	1792800000	1.75645e+09	3.86319e+09	4140470000	4.30835e+09	4.38997e+09	4.63535e+09	4.85603e+09	5.10959e+09	5.35175e+09	5.22373e+09	5.32223e+09	5.79293e+09	6.32132e+09
Netherlands	NLD	GDP (current US$)	NY.GDP.MKTP.CD	1.3283e+10	1.45998e+10	1.58476e+10	1.71937e+10	2.0232e+10	2.27219e+10	2.47415e+10	2.71438e+10	3.00976e+10	3.4086e+10	3.82209e+10	4.46447e+10	5.47871e+10	7.19466e+10	8.73718e+10	1.00397e+11	1.09329e+11	1.27204e+11	1.56089e+11	1.79934e+11	1.95439e+11	1.64376e+11	1.58713e+11	1.53671e+11	1.44124e+11	1.44058e+11	2.01158e+11	2.45407e+11	2.62296e+11	2.58717e+11	3.18799e+11	3.27982e+11	3.63497e+11	3.5407e+11	3.79688e+11	4.52967e+11	4.51373e+11	4.17506e+11	4.38613e+11	4.47779e+11	4.17649e+11	4.32536e+11	4.7553e+11	5.82436e+11	6.61225e+11	6.88134e+11
Norway	NOR	GDP (current US$)	NY.GDP.MKTP.CD	5.1974e+09	5.66969e+09	6.10708e+09	6.55327e+09	7.20652e+09	8.11195e+09	8.75394e+09	9.57738e+09	1.02271e+10	1.11362e+10	1.28141e+10	1.45831e+10	1.73586e+10	2.25343e+10	2.71457e+10	3.28778e+10	3.59423e+10	4.1508e+10	4.65229e+10	5.31322e+10	6.44394e+10	6.35967e+10	6.26472e+10	6.16272e+10	6.2058e+10	6.54169e+10	7.86931e+10	9.42299e+10	1.019e+11	1.02634e+11	1.19792e+11	1.21872e+11	1.30838e+11	1.20579e+11	1.27131e+11	1.5203e+11	1.6352e+11	1.61357e+11	1.5423e+11	1.62384e+11	1.71457e+11	1.74239e+11	1.95915e+11	2.29385e+11	2.65269e+11	3.09979e+11
Nepal	NPL	GDP (current US$)	NY.GDP.MKTP.CD	5.08334e+08	5.3196e+08	5.74091e+08	4.96948e+08	4.96099e+08	7.35267e+08	9.06812e+08	8.41974e+08	7.72231e+08	7.88642e+08	8.65975e+08	8.82765e+08	1.0241e+09	9.72102e+08	1.21795e+09	1.57579e+09	1.45279e+09	1382400000	1.60416e+09	1.85125e+09	1.94592e+09	2.27558e+09	2.39542e+09	2.44717e+09	2.58121e+09	2.61991e+09	2.85078e+09	2.95726e+09	3.48701e+09	3.52523e+09	3.62756e+09	3.92148e+09	3.40121e+09	3.66004e+09	4.06678e+09	4.4011e+09	4.52158e+09	4.91869e+09	4.85626e+09	5.03364e+09	5.49425e+09	6.00706e+09	6.05088e+09	6.33047e+09	7.27394e+09	8.13026e+09
Nauru	NRU	GDP (current US$)	NY.GDP.MKTP.CD											1.75704e+07	1.90094e+07	2.17343e+07	2.65298e+07	3.59945e+07	4.01068e+07	4.02874e+07	4.04447e+07	4.17541e+07	4.44313e+07	4.69471e+07	5.16896e+07	5.28777e+07	4.84391e+07	4.73632e+07	4.15487e+07	3.99394e+07	4.01184e+07	4.59311e+07	5.37368e+07	5.55724e+07	5.25338e+07	5.11331e+07	4.35421e+07	3.97425e+07	3.99697e+07	3.74588e+07	3.73315e+07	2.96645e+07	2.73286e+07	2.6931e+07	2.26133e+07	2.10174e+07	2.47782e+07	3.05876e+07	3.00707e+07
New Zealand	NZL	GDP (current US$)	NY.GDP.MKTP.CD	5.5361e+09	5.72199e+09	6.13316e+09	6.69974e+09	7.34077e+09	5.70625e+09	5.91744e+09	6.01602e+09	5.22805e+09	5.81436e+09	6.49561e+09	7.91114e+09	9.56733e+09	1.28023e+10	1.3941e+10	1.2862e+10	1.36048e+10	1.54468e+10	1.85305e+10	2.07312e+10	2.32445e+10	2.44176e+10	2.41646e+10	2.43093e+10	2.1666e+10	2.46798e+10	3.06047e+10	4.03764e+10	4.51768e+10	4.39202e+10	4.54951e+10	4.27453e+10	4.16498e+10	4.67756e+10	5.53147e+10	6.39187e+10	7.01408e+10	6.60751e+10	5.62272e+10	5.87623e+10	5.26233e+10	5.38724e+10	6.66277e+10	8.82509e+10	1.03905e+11	1.1472e+11
OECD members	OED	GDP (current US$)	NY.GDP.MKTP.CD	1.0615e+12	1.13213e+12	1.22416e+12	1.31761e+12	1.44185e+12	1.56649e+12	1.71494e+12	1.8329e+12	1.98802e+12	2.19083e+12	2.40043e+12	2.65938e+12	3.08899e+12	3.73908e+12	4.1942e+12	4.70021e+12	5.0931e+12	5.74406e+12	6.91445e+12	7.98284e+12	8.86595e+12	9.02819e+12	8.88851e+12	9.18852e+12	9.604e+12	1.01102e+13	1.22534e+13	14192048913694	1.60016e+13	1.67409e+13	1.88528e+13	1.99623e+13	2.14768e+13	21810120242132	2.33172e+13	2.57753e+13	2.59985e+13	2.5613e+13	25797604159261	2.71067e+13	2.77109e+13	27457252150822	2.86478e+13	3.20445e+13	3.56799e+13	3.77413e+13
Oman	OMN	GDP (current US$)	NY.GDP.MKTP.CD	4.42347e+07	4.56345e+07	5.62732e+07	5.99128e+07	6.18725e+07	6.328e+07	6.776e+07	1.07152e+08	1.8888e+08	2.4e+08	2.5632e+08	3.01011e+08	3.66884e+08	4.83067e+08	1.64592e+09	2.0967e+09	2.56022e+09	2.74117e+09	2.7403e+09	3.73335e+09	5.98176e+09	7.25912e+09	7.55472e+09	7.93254e+09	8.82144e+09	1.00056e+10	7.32417e+09	7.81118e+09	8.38622e+09	9.37217e+09	1.33103e+10	1.29183e+10	1.41836e+10	1.42304e+10	1.47152e+10	1.57222e+10	1.74021e+10	1.80398e+10	1.60442e+10	1.78328e+10	2.22596e+10	2.22057e+10	2.30655e+10	2.47337e+10	2.83789e+10	3.55069e+10
Other small states	OSS	GDP (current US$)	NY.GDP.MKTP.CD																7.53668e+09	8.75655e+09	1.07511e+10	1.24664e+10	1.63936e+10	2.44695e+10	2.28228e+10	2.18763e+10	2.00727e+10	1.98298e+10	1.93215e+10	1.92711e+10	2.4115e+10	2.5998e+10	2.65695e+10	3.1954e+10	3.35509e+10	3.63404e+10	3.47993e+10	3.68555e+10	4.37508e+10	4.49887e+10	4.50019e+10	4.51757e+10	4.71264e+10	4.7448e+10	4.76263e+10	5.21209e+10	6.4819e+10	7.6947e+10	8.62841e+10
Pakistan	PAK	GDP (current US$)	NY.GDP.MKTP.CD	3.74927e+09	4.11865e+09	4.31016e+09	4.63083e+09	5.20496e+09	5.92923e+09	6.56111e+09	7.46451e+09	8.042e+09	8.68312e+09	1.00275e+10	1.06659e+10	9.41502e+09	6.38343e+09	8.89919e+09	1.12306e+10	1.31681e+10	1.51261e+10	1.78115e+10	1.96884e+10	2.36544e+10	2.81006e+10	3.0726e+10	2.86919e+10	3.11518e+10	3.11449e+10	3.18991e+10	3.33515e+10	3.84727e+10	4.01711e+10	4.00104e+10	4.56253e+10	4.88847e+10	5.181e+10	5.22935e+10	6.06361e+10	6.33202e+10	6.24333e+10	6.2192e+10	6.29739e+10	9.94848e+10	9.71456e+10	9.79233e+10	1.12372e+11	1.32216e+11	1.45209e+11
Panama	PAN	GDP (current US$)	NY.GDP.MKTP.CD	537147100	599026300	652120900	722784500	776137500	852485300	928833000	1034376400	1112791100	1221305700	1351006400	1523917200	1673411700	1913793400	2188307600	2435304100	2588106000	2738261900	3244558600	3704551600	4614086400	5222421500	5769767900	5923755900	6183387100	6541517100	6797834200	6827665300	5902783400	5918469800	6433967000	7074675500	8042337700	8782585400	9365289800	9573813700	9.1975e+09	1.00589e+10	1.10196e+10	1.16607e+10	1.19665e+10	1.22529e+10	1.28009e+10	1.36035e+10	1.51002e+10	1.66239e+10
Peru	PER	GDP (current US$)	NY.GDP.MKTP.CD	2.57199e+09	2.89785e+09	3.28432e+09	3.59827e+09	4.35366e+09	5.16301e+09	6.10905e+09	6.19434e+09	5.73608e+09	6.42091e+09	7.43222e+09	8.28958e+09	9.18941e+09	1.09944e+10	1.38584e+10	1.69312e+10	1.6132e+10	1.45449e+10	1.24919e+10	1.5954e+10	1.81368e+10	2.16482e+10	2.17945e+10	1.73453e+10	1.76004e+10	1.50787e+10	2.18594e+10	3.68897e+10	1.54394e+10	2.24996e+10	2.64104e+10	3.43415e+10	3.59663e+10	3.48321e+10	4.48821e+10	5.33128e+10	5.52524e+10	5.81475e+10	5.55015e+10	5.01873e+10	5.17447e+10	5.20302e+10	5.47776e+10	5.8731e+10	6.67687e+10	7.60606e+10
Philippines	PHL	GDP (current US$)	NY.GDP.MKTP.CD	7.51589e+09	8.17119e+09	4.95459e+09	5.50502e+09	5.95376e+09	6.51735e+09	7.18902e+09	7.72487e+09	8.63275e+09	9.5718e+09	7.55912e+09	8.37508e+09	9.06782e+09	1.14124e+10	1.56079e+10	1.68752e+10	1.93811e+10	2.22831e+10	2.57622e+10	3.12183e+10	3.68481e+10	4.04994e+10	4.2206e+10	3.77592e+10	3.57302e+10	3.49615e+10	3.39872e+10	3.77915e+10	4.31521e+10	4.85138e+10	5.05083e+10	5.17841e+10	6.04223e+10	6.20365e+10	7.31593e+10	8.46443e+10	9.46481e+10	9.41063e+10	7.44924e+10	8.56402e+10	8.36698e+10	7.89212e+10	8.43073e+10	8.70391e+10	9.5002e+10	1.0742e+11
Palau	PLW	GDP (current US$)	NY.GDP.MKTP.CD											11563041	12706874	13956474	15331889	16848759	18521112	20364420	22308104	24530015	27004251	29728054	32726594	36027583	39661530	44814259	51030637	58109314	66169905	75348615	85800543	97702303	106555300	104771300	96455700	106138500	121018500	137494600	143860800	149079600	144206500	1.49551e+08	1.59446e+08	1.62659e+08	1.54567e+08	1.66364e+08	1.90962e+08
Papua New Guinea	PNG	GDP (current US$)	NY.GDP.MKTP.CD	2.30496e+08	2.44832e+08	2.61184e+08	2.75968e+08	3.05312e+08	3.44176e+08	3.90992e+08	4.41728e+08	4.85184e+08	5.51264e+08	6.45568e+08	7.1775e+08	8.58762e+08	1.29908e+09	1.46742e+09	1.3566e+09	1.51184e+09	1.64075e+09	1.94788e+09	2.29376e+09	2.54581e+09	2.49819e+09	2.36872e+09	2.56235e+09	2.55266e+09	2.42334e+09	2.648e+09	3.14385e+09	3.65618e+09	3.54647e+09	3.21973e+09	3.78739e+09	4.37798e+09	4.97455e+09	5.50279e+09	4.63606e+09	5.15531e+09	4.93662e+09	3.78944e+09	3.47704e+09	3.52134e+09	3.08102e+09	2.99951e+09	3.53641e+09	3.92716e+09	4.86589e+09
Poland	POL	GDP (current US$)	NY.GDP.MKTP.CD																															6.59777e+10	8.55009e+10	9.43371e+10	9.60432e+10	1.10804e+11	1.42839e+11	1.60813e+11	1.59894e+11	1.75282e+11	1.70704e+11	1.72954e+11	1.91823e+11	1.99694e+11	2.18561e+11	2.56269e+11	3.07e+11
Pre-demographic dividend	PRE	GDP (current US$)	NY.GDP.MKTP.CD	2.43642e+10	2.52567e+10	2.76662e+10	3.19834e+10	3.02687e+10	3.33509e+10	3.64637e+10	3.46945e+10	3.74179e+10	4.20866e+10	4.7414e+10	4.68951e+10	5.51029e+10	6.79025e+10	9.35977e+10	1.06608e+11	1.24631e+11	1.37555e+11	1.56118e+11	1.92717e+11	2.38217e+11	3.25165e+11	3.08203e+11	2.55682e+11	2.38958e+11	2.47848e+11	2.14951e+11	2.31284e+11	2.42239e+11	2.44959e+11	3.97041e+11	2.24731e+11	1.74865e+11	1.82711e+11	1.90512e+11	2.80322e+11	3.39779e+11	3.72343e+11	3.94008e+11	2.45466e+11	2.83218e+11	2.69596e+11	3.12135e+11	3.40469e+11	4.24234e+11	5.31122e+11
Puerto Rico (US)	PRI	GDP (current US$)	NY.GDP.MKTP.CD	1691900000	1865100000	2094400000	2333600000	2570500000	2881500000	3170500000	3532700000	3941700000	4460700000	5034700000	5646800000	6328900000	7002400000	7684800000	8198300000	8968600000	9910900000	11165000000	12750000000	14436100000	15955700000	16764200000	17276600000	19162600000	20289200000	22009300000	24025800000	26385800000	28161200000	30603919000	32287031000	34630430000	36922456000	39690630000	42647331000	45340835000	48187039000	54086400000	57841000000	61701800000	69208400000	71623500000	74827400000	80322313000	83914521300
Korea, Dem. People's Rep.	PRK	GDP (current US$)	NY.GDP.MKTP.CD
Portugal	PRT	GDP (current US$)	NY.GDP.MKTP.CD	3.33915e+09	3.57372e+09	3.83588e+09	4.08425e+09	4.4292e+09	4.90171e+09	5.37011e+09	6.00261e+09	6.64469e+09	7.28756e+09	8.10824e+09	9.2016e+09	1.12391e+10	1.50906e+10	1.75124e+10	1.93476e+10	2.03328e+10	2.14395e+10	2.34876e+10	2.66228e+10	3.28965e+10	3.19773e+10	3.05278e+10	2.72397e+10	2.5218e+10	2.71158e+10	3.87459e+10	4.81829e+10	5.63473e+10	6.05941e+10	7.87139e+10	8.92336e+10	1.07592e+11	9.50098e+10	9.96886e+10	1.18122e+11	1.2263e+11	1.17017e+11	1.23946e+11	1.2747e+11	1.18605e+11	1.21604e+11	1.34796e+11	1.65226e+11	1.89382e+11	1.97254e+11
Paraguay	PRY	GDP (current US$)	NY.GDP.MKTP.CD	2.88884e+08	3.22054e+08	3.60698e+08	3.83905e+08	4.08349e+08	4.43587e+08	4.65889e+08	4.92675e+08	5.17651e+08	5.56294e+08	5.94611e+08	6.64571e+08	7.6904e+08	9.95532e+08	1.33348e+09	1.51142e+09	1.69896e+09	2.09216e+09	2.55986e+09	3.41678e+09	4.44809e+09	5.62452e+09	5.41941e+09	5.67325e+09	4.50246e+09	3.28245e+09	3.72399e+09	3.97104e+09	4.25568e+09	4.75773e+09	5.81211e+09	6.98437e+09	7.15742e+09	7.24953e+09	7.87098e+09	9.06213e+09	9.78839e+09	9.96523e+09	9.26048e+09	8.83707e+09	8.85571e+09	8.49581e+09	7.19626e+09	7.69137e+09	9.62444e+09	1.07375e+10
West Bank and Gaza	PSE	GDP (current US$)	NY.GDP.MKTP.CD																																			2843300000	3282800000	3409600000	3759800000	4067800000	4271200000	4313600000	4003700000	3555800000	3968000000	4603100000	5125700000
Pacific island small states	PSS	GDP (current US$)	NY.GDP.MKTP.CD											4.23802e+08	4.77299e+08	5.65886e+08	7.57316e+08	1.02775e+09	1.13693e+09	1.13754e+09	1.1967e+09	1.37156e+09	1.65293e+09	1.8906e+09	1.95554e+09	1.92549e+09	1.84354e+09	1.93838e+09	1.86256e+09	2.03035e+09	1.98647e+09	2.04649e+09	2.13242e+09	2.38513e+09	2.52973e+09	2.777e+09	2.91618e+09	3.41464e+09	3.70448e+09	3.96981e+09	3.97943e+09	3.43005e+09	3.74132e+09	3.44451e+09	3.38724e+09	3.55151e+09	4.23542e+09	4.87186e+09	5.40855e+09
Post-demographic dividend	PST	GDP (current US$)	NY.GDP.MKTP.CD	1.03685e+12	1.10453e+12	1.19489e+12	1.2856e+12	1.40457e+12	1.52739e+12	1.67105e+12	1.78581e+12	1.93681e+12	2133714911578	2.34098e+12	2.59863e+12	3.01721e+12	3.64903e+12	4.07684e+12	4.5689e+12	4.95642e+12	5.60099e+12	6.74712e+12	7.7528e+12	8.57908e+12	8.67849e+12	8.63901e+12	8.96548e+12	9.36768e+12	9.86268e+12	12057445738906	1.39796e+13	1.5749e+13	1.6447e+13	1.84523e+13	1.94637e+13	20883380153099	2.10353e+13	2.25319e+13	2.50037e+13	2.51237e+13	2.4632e+13	2.47296e+13	2.59797e+13	26438505722462	2.6184e+13	2.73134e+13	3.06287e+13	3.40397e+13	3.58321e+13
French Polynesia	PYF	GDP (current US$)	NY.GDP.MKTP.CD						1.76535e+08	2.15659e+08	2.20984e+08	2.5959e+08	2.42944e+08	2.54036e+08	2.96866e+08	3.26434e+08	4.31253e+08	5.55341e+08	6.90323e+08	7.32289e+08	7.93196e+08	1.00557e+09	1.21503e+09	1.32042e+09	1.23474e+09	1.2359e+09	1.28418e+09	1.32552e+09	1.44828e+09	2.21203e+09	2.67798e+09	2.7235e+09	2.73168e+09	3.32016e+09	3.41008e+09	3.71379e+09	3.54461e+09	3.67612e+09	4.18699e+09	4.16607e+09	3.76286e+09	3.90319e+09	3.9116e+09	3.59985e+09	3.57381e+09	3.96541e+09	4.92778e+09	5.56411e+09	5.70505e+09
Qatar	QAT	GDP (current US$)	NY.GDP.MKTP.CD											3.01791e+08	3.87703e+08	5.10263e+08	7.93886e+08	2.4014e+09	2.51277e+09	3.28427e+09	3.61756e+09	4.052e+09	5.63296e+09	7.82917e+09	8.66126e+09	7.5967e+09	6.46758e+09	6.7044e+09	6.1533e+09	5.05302e+09	5.44643e+09	6.03819e+09	6.48791e+09	7.36044e+09	6.88352e+09	7.64615e+09	7.15659e+09	7.37445e+09	8.13791e+09	9.05934e+09	1.12978e+10	1.02555e+10	1.23931e+10	1.77599e+10	1.75385e+10	1.93637e+10	2.35338e+10	3.17341e+10	4.45305e+10
Romania	ROU	GDP (current US$)	NY.GDP.MKTP.CD																												3.80676e+10	4.04245e+10	4.14508e+10	3.82479e+10	2.88506e+10	2.51217e+10	2.63612e+10	3.00728e+10	3.74302e+10	3.69371e+10	3.55752e+10	4.16961e+10	3.59532e+10	3.72537e+10	4.03951e+10	4.60655e+10	5.78064e+10	7.49737e+10	9.84544e+10
Russian Federation	RUS	GDP (current US$)	NY.GDP.MKTP.CD																													5.54829e+11	5.06631e+11	5.17014e+11	5.17963e+11	4.60291e+11	4.35084e+11	3.95077e+11	3.95537e+11	3.91725e+11	4.04929e+11	2.70955e+11	1.95907e+11	2.5971e+11	3.06602e+11	3.4547e+11	4.30347e+11	5.91017e+11	7.64016e+11
Rwanda	RWA	GDP (current US$)	NY.GDP.MKTP.CD	119000024	122000016	125000008	128000000	129999994	148799980	1.24526e+08	159560018	172200018	188700037	219900006	2.22953e+08	2.46458e+08	2.90746e+08	3.08458e+08	5.71864e+08	6.37754e+08	7.46651e+08	9.05709e+08	1.10935e+09	1.25477e+09	1.40706e+09	1.40724e+09	1.47969e+09	1.58741e+09	1.71563e+09	1.94471e+09	2.15743e+09	2.39549e+09	2.40502e+09	2.55019e+09	1.9116e+09	2.02903e+09	1.97153e+09	7.53636e+08	1.29354e+09	1.38233e+09	1.85156e+09	1.98934e+09	2.15711e+09	2.06884e+09	1.9666e+09	1.966e+09	2.13824e+09	2.3765e+09	2.93382e+09
South Asia	SAS	GDP (current US$)	NY.GDP.MKTP.CD	4.327e+10	4.60764e+10	4.93047e+10	5.55394e+10	6.37415e+10	6.79702e+10	5.47387e+10	6.01553e+10	6.32114e+10	6.9749e+10	7.46588e+10	7.94432e+10	8.14263e+10	9.75619e+10	1.16964e+11	1.23401e+11	1.17989e+11	1.36743e+11	1.5504e+11	1.73921e+11	2.10608e+11	2.20616e+11	2.26595e+11	2.43701e+11	2.39973e+11	2.63679e+11	2.80349e+11	3.13355e+11	3.34075e+11	3.35791e+11	3.6474e+11	3.14469e+11	3.33546e+11	3.27009e+11	3.77443e+11	4.16342e+11	4.58508e+11	4.84983e+11	4.92856e+11	5.31826e+11	5.44941e+11	5.62554e+11	5.93707e+11	6.94776e+11	8.0416e+11	9.2442e+11
Saudi Arabia	SAU	GDP (current US$)	NY.GDP.MKTP.CD	1.74812e+09	1.92081e+09	2.13061e+09	2.20739e+09	2.37181e+09	2.64796e+09	2.92056e+09	3.25702e+09	4.18778e+09	4.48578e+09	5.37733e+09	7.18481e+09	9.66427e+09	1.49474e+10	4.5413e+10	4.67732e+10	6.40057e+10	7.4189e+10	8.02665e+10	1.11858e+11	1.6454e+11	1.84291e+11	1.5324e+11	1.29172e+11	1.19625e+11	1.03898e+11	8.69619e+10	8.56959e+10	8.82561e+10	9.53445e+10	1.1763e+11	1.32223e+11	1.37088e+11	1.32968e+11	1.35175e+11	1.43343e+11	1.58662e+11	1.65964e+11	1.46775e+11	1.61717e+11	1.89515e+11	184137600000	1.89606e+11	2.15808e+11	2.58742e+11	3.2846e+11
Sudan	SDN	GDP (current US$)	NY.GDP.MKTP.CD	1.12636e+09	1.22286e+09	1.32826e+09	1.35123e+09	1.38828e+09	1.44687e+09	1.48449e+09	1.60741e+09	1.67777e+09	1.8475e+09	2.10023e+09	2.28834e+09	2.48306e+09	3.07725e+09	3.95893e+09	4.82309e+09	6.01321e+09	7.49901e+09	8.12872e+09	8.41841e+09	8951800000	1.07539e+10	8.73254e+09	8.23015e+09	1.04476e+10	8.07526e+09	10092200000	1.20933e+10	1.43726e+10	2.14081e+10	3.36412e+10	4.41712e+10	7.03193e+09	8.88101e+09	1.27938e+10	1.38304e+10	9.0183e+09	1.16812e+10	1.12502e+10	1.0682e+10	1.22573e+10	1.57164e+10	1.81371e+10	2.13553e+10	2.6646e+10	3.51827e+10
Senegal	SEN	GDP (current US$)	NY.GDP.MKTP.CD	1.00369e+09	1.05898e+09	1.08548e+09	1.12214e+09	1.18893e+09	1.21006e+09	1.24691e+09	1.24648e+09	1.30938e+09	1.24523e+09	1.29741e+09	1.33955e+09	1.62086e+09	1.8634e+09	2.09933e+09	2.83039e+09	2.86978e+09	2.93805e+09	3.28035e+09	4.08488e+09	4.51011e+09	4.09589e+09	4.01395e+09	3.56936e+09	3.48517e+09	3.81894e+09	5.39209e+09	6.48735e+09	6.41842e+09	6.36604e+09	7.39097e+09	7.25521e+09	7.76982e+09	7.36799e+09	5.03459e+09	6.32634e+09	6.55971e+09	6.04148e+09	6.50561e+09	6.59283e+09	6.01319e+09	6.50782e+09	7.0064e+09	8.76872e+09	1.00768e+10	1.1009e+10
Singapore	SGP	GDP (current US$)	NY.GDP.MKTP.CD	7.04752e+08	7.6463e+08	8.26239e+08	9.17608e+08	8.94153e+08	9.74644e+08	1.09643e+09	1.23804e+09	1.42571e+09	1.65989e+09	1.92057e+09	2.26379e+09	2.72144e+09	3.69621e+09	5.22153e+09	5.63367e+09	6.32708e+09	6.61859e+09	7.51718e+09	9.29692e+09	1.18963e+10	1.41752e+10	1.60843e+10	1.77841e+10	1.97494e+10	1.91565e+10	1.85867e+10	2.09192e+10	2.53715e+10	3.04654e+10	3.61443e+10	4.54662e+10	5.21313e+10	6.06038e+10	7.36887e+10	8.78125e+10	9.62931e+10	1.00124e+11	8.57282e+10	8.62868e+10	9.60765e+10	8.97938e+10	9.25384e+10	9.76464e+10	1.15034e+11	1.27808e+11
Solomon Islands	SLB	GDP (current US$)	NY.GDP.MKTP.CD								2.52035e+07	2.80843e+07	2.86064e+07		5.00569e+07	4.06067e+07	5.52721e+07	8.45393e+07	7.46203e+07	8.31008e+07	9.31453e+07	1.11027e+08	1.51276e+08	1.82852e+08	1.93751e+08	1.92902e+08	1.8122e+08	1.8157e+08	1.65525e+08	1.4762e+08	1.55129e+08	1.76494e+08	1.72882e+08	2.14878e+08	2.2754e+08	2.69035e+08	3.00746e+08	4.02837e+08	4.69443e+08	5.10586e+08	5.26554e+08	4.5758e+08	4.88025e+08	4.19843e+08	4.09509e+08	3.46407e+08	4.17667e+08	4.68e+08	5.52881e+08
Sierra Leone	SLE	GDP (current US$)	NY.GDP.MKTP.CD	3.2201e+08	3.27834e+08	3.42721e+08	3.48547e+08	3.71847e+08	3.5938e+08	3.7548e+08	3.48795e+08	3.2986e+08	4.0869e+08	4.34411e+08	4.19549e+08	4.65381e+08	5.75231e+08	6.48591e+08	6.79336e+08	5.94896e+08	6.91778e+08	9.60728e+08	1.10937e+09	1.10069e+09	1.11483e+09	1.29536e+09	9.95104e+08	1.08747e+09	8.5689e+08	4.90181e+08	6.60106e+08	1.05508e+09	9.32974e+08	6.49644e+08	7.79982e+08	6.79941e+08	7.68868e+08	9.11854e+08	8.7074e+08	9.41709e+08	8.50233e+08	6.72368e+08	6.69387e+08	6.35866e+08	1.68147e+09	1.93386e+09	2.14262e+09	2.23735e+09	2.54528e+09
El Salvador	SLV	GDP (current US$)	NY.GDP.MKTP.CD						877720000	929520000	976200000	1009760100	1049400000	1132920000	1186120000	1263720000	1442320000	1665880000	1884120100	2328280100	2941640100	3127960000	3463639900	3573959900	3437200200	3399189100	3506347800	3661683400	3800368600	3771663200	3958045800	4189880000	4372215300	4817542204	5252342400	5813399300	6680269200	7679384000	8921947100	9586327800	10221705900	10936669900	11284197000	11784927700	12282533600	12664190300	13243892200	13724810900	14698000000
San Marino	SMR	GDP (current US$)	NY.GDP.MKTP.CD																																						9.76607e+08	1.04832e+09	1.10947e+09	1.00766e+09	1.05953e+09	1.14887e+09	1.46259e+09	1.71534e+09	1.78651e+09
Somalia, Fed. Rep.	SOM	GDP (current US$)	NY.GDP.MKTP.CD	1.8046e+08	1.9166e+08	2.03532e+08	2.16146e+08	2.2953e+08	2.43726e+08	2.57376e+08	2.71782e+08	2.8672e+08	3.06357e+08	3.47985e+08	3.47039e+08	4.47884e+08	4.837e+08	5.72504e+08	7.57016e+08	8.71344e+08	4.98551e+08	5.64572e+08	5.89567e+08	6.02516e+08	6.99302e+08	7.74579e+08	7.35409e+08	7.87435e+08	8.75702e+08	9.16591e+08	1.01897e+09	1.0516e+09	1.18136e+09	1.03128e+09	7.17975e+08	7.09298e+08	1.26013e+09	1.48121e+09	1.53476e+09	1.79223e+09	2.19175e+09	2.96205e+09	3.04575e+09	3.4128e+09	2.25285e+09	2.19268e+09	2.83672e+09	3.85959e+09	4.68325e+09
Serbia	SRB	GDP (current US$)	NY.GDP.MKTP.CD																																				1.79219e+10	2.32774e+10	2.71534e+10	2.10041e+10	2.08787e+10	7.32637e+09	1.35994e+10	1.79306e+10	2.3593e+10	2.68456e+10	2.83343e+10
Sub-Saharan Africa (excluding high income)	SSA	GDP (current US$)	NY.GDP.MKTP.CD	3.43186e+10	3.57752e+10	3.87438e+10	4.42527e+10	4.38345e+10	4.83086e+10	5.2377e+10	5.22852e+10	5.59673e+10	6.3402e+10	7.08616e+10	7.27511e+10	8.20917e+10	1.0509e+11	1.33953e+11	1.47548e+11	1.59631e+11	1.75173e+11	1.96493e+11	2.32171e+11	2.92958e+11	3.97377e+11	3.68486e+11	3.29002e+11	2.93477e+11	2.7837e+11	2.59861e+11	2.91517e+11	3.07147e+11	3.12233e+11	3.66869e+11	3.92434e+11	3.54645e+11	3.60285e+11	3.70569e+11	4.72706e+11	5.2826e+11	5.55912e+11	5.58197e+11	3.96098e+11	4.19896e+11	4.02042e+11	4.40921e+11	5.56578e+11	6.91867e+11	8.23669e+11
South Sudan	SSD	GDP (current US$)	NY.GDP.MKTP.CD
Sub-Saharan Africa	SSF	GDP (current US$)	NY.GDP.MKTP.CD	3.59928e+10	3.75217e+10	4.05535e+10	4.61272e+10	4.5891e+10	5.05436e+10	5.47801e+10	5.48429e+10	5.86863e+10	6.62583e+10	7.39989e+10	7.60788e+10	8.57278e+10	1.0928e+11	1.38642e+11	1.52221e+11	1.64674e+11	1.80959e+11	2.02653e+11	2.38924e+11	3.00099e+11	4.04964e+11	3.76485e+11	3.37928e+11	3.01936e+11	2.8831e+11	2.7024e+11	3.02632e+11	3.1869e+11	3.2439e+11	3.79792e+11	4.06697e+11	3.65899e+11	3.69858e+11	3.78182e+11	4.81079e+11	5.3753e+11	5.65283e+11	5.66816e+11	4.04652e+11	4.28789e+11	4.10936e+11	4.49501e+11	5.6592e+11	7.02843e+11	8.36994e+11
Small states	SST	GDP (current US$)	NY.GDP.MKTP.CD											4.89089e+09	5.46862e+09	6.35129e+09	7.97569e+09	1.26975e+10	1.37568e+10	1.50456e+10	1.81159e+10	2.08655e+10	2.67011e+10	3.72978e+10	3.70802e+10	3.76513e+10	3.57571e+10	3.62037e+10	3.57628e+10	3.36181e+10	3.87258e+10	4.10253e+10	4.15031e+10	4.79354e+10	5.0019e+10	5.3255e+10	5.14809e+10	5.50183e+10	6.30809e+10	6.58159e+10	6.90562e+10	7.02495e+10	7.42616e+10	7.65181e+10	7.75182e+10	8.34144e+10	9.96438e+10	1.15417e+11	1.29917e+11
Sao Tome and Principe	STP	GDP (current US$)	NY.GDP.MKTP.CD											3.72118e+07	3.72888e+07	4.14303e+07	5.60112e+07	5.78176e+07	6.01017e+07	5.20394e+07	4.92077e+07	5.50446e+07	6.57559e+07	8.16622e+07	8.34993e+07	8.03078e+07	7.51103e+07	7.82138e+07	8.27331e+07	1.15929e+08	1.15953e+08	9.90008e+07	9.85454e+07	1.19298e+08	1.07484e+08	9.48618e+07	1.25742e+08	1.31338e+08	1.03695e+08	1.35188e+08	9.19203e+07	7.22854e+07	7.73022e+07	7.61984e+07	7.59511e+07	8.51711e+07	1.02086e+08	1.14582e+08	1.36451e+08
Suriname	SUR	GDP (current US$)	NY.GDP.MKTP.CD	99650000	107700000	116150000	125950000	134400000	154150000	190350000	220700000	241350000	259650000	274900000	301000000	311950000	339450000	409850000	465500000	505500000	641500000	735500000	782500000	795000000	889000000	915000000	883500000	864000000	873000000	891000000	980000000	1161000000	542600000	388400000	448100000	404600000	4.28765e+08	6.05493e+08	6.9159e+08	8.61373e+08	926422500	1110850000	8.86291e+08	9.47672e+08	8.34279e+08	1.09357e+09	1.27419e+09	1.48409e+09	1.79341e+09
Slovak Republic	SVK	GDP (current US$)	NY.GDP.MKTP.CD																															1.2915e+10	1.44599e+10	1.56993e+10	1.6738e+10	2.04281e+10	2.618e+10	2.81978e+10	2.78446e+10	2.99762e+10	3.04963e+10	2.92157e+10	3.07267e+10	3.52437e+10	4.66161e+10	5.72155e+10	6.25478e+10
Slovenia	SVN	GDP (current US$)	NY.GDP.MKTP.CD																															1.9832e+10	1.44545e+10	1.42773e+10	1.44493e+10	1.64008e+10	2.13674e+10	2.14707e+10	2.07269e+10	2.20586e+10	2.26097e+10	2.01592e+10	2.06689e+10	2.32146e+10	2.93606e+10	3.41566e+10	3.59479e+10
Sweden	SWE	GDP (current US$)	NY.GDP.MKTP.CD	1.59301e+10	1.73296e+10	1.87941e+10	2.03421e+10	2.26855e+10	2.49639e+10	2.71547e+10	2.94749e+10	3.12779e+10	3.39673e+10	3.80372e+10	4.15062e+10	4.88832e+10	5.93188e+10	6.59176e+10	8.27652e+10	8.92325e+10	9.43318e+10	1.04291e+11	1.23208e+11	1.41886e+11	1.29499e+11	1.14215e+11	1.04862e+11	1.09043e+11	1.13958e+11	1.5028e+11	1.82744e+11	2.06687e+11	2.17632e+11	2.61467e+11	2.73831e+11	2.83909e+11	2.12645e+11	2.28699e+11	2.6705e+11	2.9195e+11	2.6825e+11	2.70887e+11	2.74318e+11	2.62904e+11	2.42498e+11	2.67372e+11	3.34072e+11	3.84545e+11	3.91688e+11
Eswatini	SWZ	GDP (current US$)	NY.GDP.MKTP.CD	3.50768e+07	4.3026e+07	4.5928e+07	5.41294e+07	6.49806e+07	7.028e+07	7.686e+07	7.476e+07	7.98e+07	1.0542e+08	1.1214e+08	1.36462e+08	1.46736e+08	2.21915e+08	2.64321e+08	2.883e+08	2.7255e+08	3.0406e+08	3.4063e+08	4.12093e+08	5.41977e+08	5.70775e+08	5.37568e+08	5.55336e+08	4.94483e+08	3.60079e+08	4.4914e+08	5.84126e+08	6.92026e+08	6.96922e+08	1.11469e+09	1.15614e+09	1.28476e+09	1.35719e+09	1.41929e+09	1.69899e+09	1.60274e+09	1.71671e+09	1.57691e+09	1.54789e+09	1.69716e+09	1.50287e+09	1.39395e+09	2.14963e+09	2.71033e+09	3.09795e+09
Sint Maarten (Dutch part)	SXM	GDP (current US$)	NY.GDP.MKTP.CD
Seychelles	SYC	GDP (current US$)	NY.GDP.MKTP.CD	1.2012e+07	1.1592e+07	1.2642e+07	1.3923e+07	1.5393e+07	1.5603e+07	1.6443e+07	1.6632e+07	1.6074e+07	1.6452e+07	1.8432e+07	2.1966e+07	3.06451e+07	3.68963e+07	4.31345e+07	4.78031e+07	4.9279e+07	6.45264e+07	8.55524e+07	1.27261e+08	1.56784e+08	1.63751e+08	1.57212e+08	1.56098e+08	1.60993e+08	1.79691e+08	2.21147e+08	2.65213e+08	3.01986e+08	3.24333e+08	3.92164e+08	3.98307e+08	4.61409e+08	5.04231e+08	5.1757e+08	5.40733e+08	5.3525e+08	5.98967e+08	6.47287e+08	6.62839e+08	6.54212e+08	6.62064e+08	7.42135e+08	7.50847e+08	8.93012e+08	9.77899e+08
Syrian Arab Republic	SYR	GDP (current US$)	NY.GDP.MKTP.CD	8.57704e+08	9.45245e+08	1.11057e+09	1.20045e+09	1.33949e+09	1.47204e+09	1.34229e+09	1.58023e+09	1.75375e+09	2.24501e+09	2.14038e+09	2.58985e+09	3.05968e+09	3.23949e+09	5.15956e+09	6.82698e+09	7.63353e+09	7.69601e+09	9.2752e+09	9.92968e+09	1.30624e+10	1.55182e+10	1.62989e+10	1.75893e+10	1.75031e+10	1.64035e+10	1.32932e+10	1.13562e+10	1.0577e+10	9.8534e+09	1.23086e+10	1.29818e+10	1.32536e+10	1.3696e+10	10122020000	1.13967e+10	1.37896e+10	1.45052e+10	1.52008e+10	1.58739e+10	1.89371e+10	2.0237e+10	2.06694e+10	2.18281e+10	2.5087e+10	2.8859e+10
Turks and Caicos Islands	TCA	GDP (current US$)	NY.GDP.MKTP.CD																																										358744800	366707900	409753600	485598800	578645800
Chad	TCD	GDP (current US$)	NY.GDP.MKTP.CD	3.13583e+08	3.33975e+08	3.57636e+08	3.71767e+08	3.92248e+08	4.16926e+08	4.32795e+08	4.49826e+08	4.5398e+08	4.71636e+08	4.69267e+08	5.01867e+08	5.85428e+08	6.47199e+08	6.52533e+08	8.64602e+08	8.66045e+08	9.3536e+08	1.11392e+09	1.00432e+09	1.033e+09	8.76938e+08	8.3437e+08	8.32416e+08	9.19104e+08	1.03307e+09	1.06783e+09	1.16343e+09	1.4826e+09	1.43369e+09	1.73861e+09	1.87714e+09	1.88185e+09	1.46325e+09	1.17984e+09	1.44592e+09	1.60735e+09	1.54469e+09	1.74479e+09	1.53467e+09	1.38851e+09	1.71084e+09	1.99701e+09	2.74282e+09	4.42286e+09	8.65589e+09
East Asia & Pacific (IDA & IBRD countries)	TEA	GDP (current US$)	NY.GDP.MKTP.CD	8.08032e+10	7.11744e+10	6.49226e+10	7.02164e+10	8.11012e+10	9.4498e+10	1.03377e+11	1.00372e+11	1.01477e+11	1.14101e+11	1.27052e+11	1.36441e+11	1.55359e+11	1.95413e+11	2.21441e+11	2.4852e+11	2.52687e+11	2.9123e+11	2.82631e+11	3.2725e+11	3.7755e+11	4.0313e+11	4.23408e+11	4.43371e+11	4.80404e+11	5.26032e+11	5.24622e+11	5.18488e+11	5.75525e+11	6.22194e+11	6.66726e+11	7.23905e+11	8.1213e+11	8.91466e+11	1.07328e+12	1.32424e+12	1.52137e+12	1.57497e+12	1.43965e+12	1.58595e+12	1.7466e+12	1.86078e+12	2.06145e+12	2.33515e+12	2.70916e+12	3.13637e+12
Europe & Central Asia (IDA & IBRD countries)	TEC	GDP (current US$)	NY.GDP.MKTP.CD																													9.91142e+11	9.6417e+11	1.02335e+12	1.00172e+12	9.28556e+11	9.19179e+11	8.28927e+11	9.9138e+11	1.02124e+12	1.05634e+12	9.49935e+11	8.24131e+11	8.96291e+11	9.1168e+11	1.02483e+12	1.26102e+12	1.63137e+12	2.04299e+12
Togo	TGO	GDP (current US$)	NY.GDP.MKTP.CD	1.71057e+08	1.78497e+08	1.86746e+08	2.02306e+08	2.34572e+08	2.64506e+08	3.05228e+08	3.27216e+08	3.41692e+08	3.78092e+08	3.58666e+08	4.04648e+08	4.74044e+08	5.74031e+08	7.9145e+08	8.71782e+08	8.74682e+08	1.09789e+09	1.16403e+09	1.25937e+09	1.60484e+09	1.35903e+09	1.16034e+09	1.08139e+09	1.01417e+09	1.0766e+09	1.49822e+09	1.76398e+09	1.94721e+09	1.91064e+09	2.29967e+09	2.26277e+09	2.3908e+09	1.74194e+09	1.38766e+09	1.84911e+09	2.06951e+09	2.11682e+09	2.24165e+09	2.22658e+09	2.10685e+09	2.0935e+09	2.4102e+09	2.98798e+09	3.19156e+09	3.22191e+09
Thailand	THA	GDP (current US$)	NY.GDP.MKTP.CD	2.76075e+09	3.03404e+09	3.30891e+09	3.5404e+09	3.88913e+09	4.38894e+09	5.27923e+09	5.63846e+09	6.08101e+09	6.69534e+09	7.08654e+09	7.375e+09	8.17787e+09	1.08386e+10	1.3703e+10	1.48828e+10	1.69852e+10	1.97793e+10	2.40066e+10	2.73717e+10	3.23535e+10	3.4846e+10	3.65898e+10	4.00428e+10	4.17976e+10	3.89007e+10	4.30968e+10	5.05354e+10	6.16673e+10	7.22507e+10	8.53432e+10	9.82347e+10	1.11453e+11	1.28889e+11	1.46684e+11	1.69279e+11	1.83035e+11	1.5018e+11	1.13676e+11	1.26669e+11	1.26392e+11	1.20296e+11	1.34301e+11	1.52281e+11	1.72896e+11	1.89318e+11
Tajikistan	TJK	GDP (current US$)	NY.GDP.MKTP.CD																															2.6294e+09	2.53659e+09	1.90855e+09	1.64662e+09	1.522e+09	1.23156e+09	1.04365e+09	9.21518e+08	1.3202e+09	1.08661e+09	8.60542e+08	1.08077e+09	1.22111e+09	1.55532e+09	2.07618e+09	2.31235e+09
Turkmenistan	TKM	GDP (current US$)	NY.GDP.MKTP.CD																												2.33136e+09	3.01098e+09	3.00699e+09	3.18954e+09	3.2081e+09	3.20054e+09	3.17923e+09	2.56112e+09	2.48223e+09	2.37876e+09	2.45035e+09	2.60569e+09	2.45056e+09	2.90466e+09	3.53477e+09	4.46203e+09	5.97744e+09	6.83835e+09	8.1039e+09
Latin America & the Caribbean (IDA & IBRD countries)	TLA	GDP (current US$)	NY.GDP.MKTP.CD	7.43991e+10	8.23628e+10	8.63998e+10	9.38448e+10	1.04303e+11	1.11947e+11	1.23241e+11	1.25362e+11	1.34362e+11	1.49979e+11	1.635e+11	1.81795e+11	2.04232e+11	2.74036e+11	3.58183e+11	3.74351e+11	4.11065e+11	4.52377e+11	5.41375e+11	6.07503e+11	7.43796e+11	8.52847e+11	7.79872e+11	6.81555e+11	7.15171e+11	7.06308e+11	7.12611e+11	7.65001e+11	8.39372e+11	9.31219e+11	1.03937e+12	1.12357e+12	1.23256e+12	1.46687e+12	1.71519e+12	1.85593e+12	2.01632e+12	2.21207e+12	2.23335e+12	2.00275e+12	2.21446e+12	2.16136e+12	1.92732e+12	1.96052e+12	2.26488e+12	2.752e+12
Timor-Leste	TLS	GDP (current US$)	NY.GDP.MKTP.CD																															128210142	147713000	187891500	216914400	239040500	262819900	306956900	319972700	325729800	225357600	3.66924e+08	4.77359e+08	4.69455e+08	4.90439e+08	4.40772e+08	4.62268e+08
Middle East, North Africa, Afghanistan & Pakistan (IDA & IBRD)	TMN	GDP (current US$)	NY.GDP.MKTP.CD	2.1779e+10	2.27178e+10	2.31279e+10	2.54789e+10	2.84608e+10	3.15553e+10	3.37023e+10	3.70169e+10	4.15678e+10	4.62282e+10	5.19294e+10	5.87382e+10	6.67284e+10	8.22965e+10	1.26534e+11	1.45361e+11	1.79327e+11	2.07141e+11	2.22363e+11	2.76441e+11	3.3568e+11	3.27782e+11	3.66322e+11	4.00996e+11	4.18884e+11	4.50074e+11	4.83834e+11	4.2361e+11	4.108e+11	4.12557e+11	5.57462e+11	3.77591e+11	3.87386e+11	3.41579e+11	3.5909e+11	4.0007e+11	4.43484e+11	4.62009e+11	4.71749e+11	5.1097e+11	5.73242e+11	5.7641e+11	5.61356e+11	6.20752e+11	7.35138e+11	8.51999e+11
Tonga	TON	GDP (current US$)	NY.GDP.MKTP.CD																3.25067e+07	3.00364e+07	3.41394e+07	4.15675e+07	4.4667e+07	5.32601e+07	6.2242e+07	6.20682e+07	6.0864e+07	6.42484e+07	6.00587e+07	6.81959e+07	8.16671e+07	1.06657e+08	1.06345e+08	1.13564e+08	1.32201e+08	1.37066e+08	1.3849e+08	1.95991e+08	2.08872e+08	2.22101e+08	2.14991e+08	1.91505e+08	1.99209e+08	2.04848e+08	1.81117e+08	1.82764e+08	2.02247e+08	2.30678e+08	2.61824e+08
South Asia (IDA & IBRD)	TSA	GDP (current US$)	NY.GDP.MKTP.CD	4.327e+10	4.60764e+10	4.93047e+10	5.55394e+10	6.37415e+10	6.79702e+10	5.47387e+10	6.01553e+10	6.32114e+10	6.9749e+10	7.46588e+10	7.94432e+10	8.14263e+10	9.75619e+10	1.16964e+11	1.23401e+11	1.17989e+11	1.36743e+11	1.5504e+11	1.73921e+11	2.10608e+11	2.20616e+11	2.26595e+11	2.43701e+11	2.39973e+11	2.63679e+11	2.80349e+11	3.13355e+11	3.34075e+11	3.35791e+11	3.6474e+11	3.14469e+11	3.33546e+11	3.27009e+11	3.77443e+11	4.16342e+11	4.58508e+11	4.84983e+11	4.92856e+11	5.31826e+11	5.44941e+11	5.62554e+11	5.93707e+11	6.94776e+11	8.0416e+11	9.2442e+11
Sub-Saharan Africa (IDA & IBRD countries)	TSS	GDP (current US$)	NY.GDP.MKTP.CD	3.59928e+10	3.75217e+10	4.05535e+10	4.61272e+10	4.5891e+10	5.05436e+10	5.47801e+10	5.48429e+10	5.86863e+10	6.62583e+10	7.39989e+10	7.60788e+10	8.57278e+10	1.0928e+11	1.38642e+11	1.52221e+11	1.64674e+11	1.80959e+11	2.02653e+11	2.38924e+11	3.00099e+11	4.04964e+11	3.76485e+11	3.37928e+11	3.01936e+11	2.8831e+11	2.7024e+11	3.02632e+11	3.1869e+11	3.2439e+11	3.79792e+11	4.06697e+11	3.65899e+11	3.69858e+11	3.78182e+11	4.81079e+11	5.3753e+11	5.65283e+11	5.66816e+11	4.04652e+11	4.28789e+11	4.10936e+11	4.49501e+11	5.6592e+11	7.02843e+11	8.36994e+11
Trinidad and Tobago	TTO	GDP (current US$)	NY.GDP.MKTP.CD	5.35673e+08	5.84965e+08	6.19323e+08	6.78239e+08	7.11898e+08	7.36573e+08	7.2374e+08	7.61982e+08	758899950	779200000	821850000	8.96765e+08	1.08339e+09	1.30879e+09	2.042e+09	2.44267e+09	2.50042e+09	3.13867e+09	3.56233e+09	4602416625	6.23583e+09	6.99208e+09	8.14042e+09	7763750000	7.75708e+09	7.37592e+09	4.79444e+09	4.79778e+09	4.49691e+09	4.32306e+09	5068000000	5.30791e+09	5.43955e+09	4.66949e+09	4.94718e+09	5.32922e+09	5.75957e+09	5.73777e+09	6.04369e+09	6.80898e+09	8.15434e+09	8.82485e+09	9.0083e+09	1.13055e+10	1.32803e+10	1.59824e+10
Tunisia	TUN	GDP (current US$)	NY.GDP.MKTP.CD		8.66155e+08	8.80028e+08	1026737600	1.02587e+09	9.91048e+08	1.04095e+09	1.08571e+09	1.21467e+09	1.2899e+09	1.43924e+09	1.68516e+09	2.23756e+09	2.73081e+09	3.54587e+09	4.32897e+09	4.50819e+09	5.10932e+09	5.96846e+09	7.18886e+09	8.74413e+09	8.42845e+09	8.13358e+09	8.35058e+09	8.25454e+09	8.41023e+09	9.01781e+09	9.69672e+09	1.00962e+10	1.01019e+10	1.22906e+10	1.30748e+10	1.54967e+10	1.46083e+10	1.56332e+10	1.80309e+10	1.95872e+10	2.07462e+10	2.18029e+10	2.29432e+10	2.14735e+10	2.20658e+10	2.31416e+10	2.74539e+10	3.11839e+10	3.22722e+10
Turkiye	TUR	GDP (current US$)	NY.GDP.MKTP.CD	7.56667e+09	7.98889e+09	8.92222e+09	1.03556e+10	1.11778e+10	1.19667e+10	14100000000	1.56444e+10	17500000000	1.94667e+10	1.78636e+10	1.61667e+10	20650000000	26000000000	3.54143e+10	4.60429e+10	51450000000	5.86833e+10	65912500000	8.96161e+10	6.88237e+10	7.11802e+10	6.43693e+10	6.18036e+10	5.99376e+10	6.72328e+10	7.5673e+10	8.71901e+10	9.08752e+10	1.07127e+11	1.50656e+11	1.51035e+11	1.59105e+11	1.80416e+11	1.3065e+11	2.347e+11	2.50367e+11	2.63818e+11	2.76035e+11	2.56674e+11	2.74748e+11	2.02195e+11	2.40778e+11	3.15393e+11	4.10157e+11	5.08314e+11
Tuvalu	TUV	GDP (current US$)	NY.GDP.MKTP.CD											2.58596e+06	2.71699e+06	2.96846e+06	3.41192e+06	4.12233e+06	4.01475e+06	3.91907e+06	3.66942e+06	3.79878e+06	4.06566e+06	4.20613e+06	4.77302e+06	4.11895e+06	4.15255e+06	4.48198e+06	3.86285e+06	4.57471e+06	5.02051e+06	7.01106e+06	8.45452e+06	9.5429e+06	1.01273e+07	1.0535e+07	1.04144e+07	1.17726e+07	1.19226e+07	1.33386e+07	1.37342e+07	1.37951e+07	1.48005e+07	1.5074e+07	1.39647e+07	1.68427e+07	1.94563e+07	2.27983e+07	2.291e+07
Tanzania	TZA	GDP (current US$)	NY.GDP.MKTP.CD	2.65173e+09	2.82618e+09	3.10159e+09	3.45658e+09	3.74884e+09	3.81723e+09	4.378e+09	4.56513e+09	4.89525e+09	5.14207e+09	2.85142e+09	3.05067e+09	3.47279e+09	4.1441e+09	4.97734e+09	5.72992e+09	6.47251e+09	7.7326e+09	9.26168e+09	9.80464e+09	1.14092e+10	1.31615e+10	1.39274e+10	1.40499e+10	1.29066e+10	1.53283e+10	1.08409e+10	7.82419e+09	7.40661e+09	6.4188e+09	6.18438e+09	7.19777e+09	6.682e+09	6.18287e+09	6.55048e+09	7.63143e+09	9.43353e+09	1.11582e+10	1.21728e+10	1.27043e+10	1.33718e+10	1.3564e+10	1.41297e+10	1.52115e+10	1.66731e+10	1.83954e+10
Uganda	UGA	GDP (current US$)	NY.GDP.MKTP.CD	4.23146e+08	4.41667e+08	4.49158e+08	5.16315e+08	5.89248e+08	8.84502e+08	9.25381e+08	9.67241e+08	1.03738e+09	1.16856e+09	1.25955e+09	1.41719e+09	1.49097e+09	1.70183e+09	2.09894e+09	2.35956e+09	2447300000	2.93647e+09	2.42026e+09	2139025000	1244610000	1337300000	2177500000	2.24033e+09	3.61565e+09	3.5197e+09	3.92324e+09	6.26952e+09	6.50893e+09	5.27648e+09	4.3044e+09	3.32173e+09	2.85746e+09	3.22044e+09	3.99043e+09	5.75582e+09	6.04459e+09	6.26933e+09	6.58482e+09	5.99856e+09	6.19325e+09	5.8405e+09	6.17856e+09	6.60688e+09	7.93949e+09	9.23922e+09
Ukraine	UKR	GDP (current US$)	NY.GDP.MKTP.CD																												6.40877e+10	7.47035e+10	8.27092e+10	8.13936e+10	7.73507e+10	7.39459e+10	6.56486e+10	5.25496e+10	4.82139e+10	4.45588e+10	5.01515e+10	4.18825e+10	3.15806e+10	3.23751e+10	3.93096e+10	4.39562e+10	5.20104e+10	6.72202e+10	8.92389e+10
Upper middle income	UMC	GDP (current US$)	NY.GDP.MKTP.CD	1.68301e+11	1.65922e+11	1.6738e+11	1.83977e+11	2.10883e+11	2.35906e+11	2.60317e+11	2.63557e+11	2.78937e+11	3.13018e+11	3.43935e+11	3.74393e+11	4.29646e+11	5.66427e+11	7.28956e+11	8.06609e+11	8.73862e+11	9.79427e+11	1.07927e+12	1.25663e+12	1.47198e+12	1.59127e+12	1.56292e+12	1.52873e+12	1.6154e+12	1.66663e+12	1.71085e+12	1.72713e+12	1.86603e+12	2.0659e+12	2.41029e+12	2.33583e+12	2.49685e+12	2.75258e+12	3.10024e+12	3.59045e+12	3.96936e+12	4.22748e+12	4.10156e+12	3.99409e+12	4.36761e+12	4.37246e+12	4.40793e+12	4.91536e+12	5.80008e+12	6.89504e+12
Uruguay	URY	GDP (current US$)	NY.GDP.MKTP.CD	1.24229e+09	1.54739e+09	1.71e+09	1.53968e+09	1.9757e+09	1.89077e+09	1.80919e+09	1.59771e+09	1.59367e+09	2.00444e+09	2.1371e+09	2.80726e+09	2.18942e+09	3.9643e+09	4.09021e+09	3.53828e+09	3.66716e+09	4.11467e+09	4.91025e+09	7.18118e+09	1.0163e+10	1.10483e+10	9.17878e+09	5.10228e+09	4.85024e+09	4.73202e+09	5.88011e+09	7.36749e+09	8.21354e+09	8.43895e+09	9.29881e+09	1.12062e+10	1.28781e+10	1.50021e+10	1.74746e+10	1.92977e+10	2.05155e+10	2.39697e+10	2.53859e+10	2.39839e+10	2.28233e+10	2.08988e+10	1.36065e+10	1.20456e+10	1.36863e+10	1.73629e+10
United States	USA	GDP (current US$)	NY.GDP.MKTP.CD	5.41989e+11	5.6194e+11	6.03639e+11	6.37059e+11	6.84145e+11	7.41905e+11	8.13033e+11	8.5962e+11	940225000000	1.01744e+12	1073303000000	1164850000000	1279110000000	1425376000000	1545243000000	1684904000000	1873412000000	2081826000000	2351599000000	2627333000000	2857307000000	3207041000000	3343789000000	3634038000000	4037613000000	4338979000000	4579631000000	4855215000000	5236438000000	5641580000000	5963144000000	6158129000000	6520327000000	6858559000000	7287236000000	7639749000000	8073122000000	8577554457000	9062818202000	9631174489000	10250947997000	10581929774000	10929112955000	11456442041000	12217193198000	13039199193000
Uzbekistan	UZB	GDP (current US$)	NY.GDP.MKTP.CD																												8.52316e+09	1.07228e+10	1.19488e+10	1.33623e+10	1.38002e+10	1.29538e+10	1.30999e+10	1.28991e+10	1.33505e+10	1.39489e+10	1.47446e+10	1.4989e+10	1.70785e+10	1.37605e+10	1.14014e+10	9.68779e+09	1.01345e+10	1.203e+10	1.43075e+10
St. Vincent and the Grenadines	VCT	GDP (current US$)	NY.GDP.MKTP.CD	1.30666e+07	1.4e+07	1.4525e+07	1.37083e+07	1.47583e+07	1.51083e+07	1.61e+07	1.58351e+07	15350000	16650000	18450000	2.00519e+07	2.75858e+07	3.01651e+07	3.29237e+07	3.32372e+07	3.27928e+07	4.93532e+07	6.08448e+07	7.10964e+07	8.23403e+07	1.02087e+08	1.13759e+08	1.22255e+08	1.35025e+08	1.45642e+08	1.60847e+08	1.75581e+08	2.00727e+08	2.14745e+08	2.40367e+08	2.5483e+08	2.77956e+08	2.86307e+08	2.89437e+08	3.16007e+08	3.31489e+08	3.4777e+08	3.73619e+08	3.90719e+08	4.27946e+08	4.62072e+08	4.87764e+08	5.09091e+08	5.499e+08	5.79949e+08
Venezuela, RB	VEN	GDP (current US$)	NY.GDP.MKTP.CD	7.66394e+09	8.06727e+09	8.81431e+09	9.60872e+09	8.19241e+09	8.42778e+09	8.78133e+09	9250000000	1.00344e+10	1.02851e+10	1.15611e+10	1.29866e+10	1.39777e+10	1.70356e+10	2.61009e+10	2.74647e+10	3.14195e+10	3.62107e+10	3.93163e+10	4.83109e+10	5.91165e+10	6.63274e+10	6.77367e+10	6.75563e+10	5.98677e+10	6.19655e+10	6.05161e+10	4.8029e+10	6.02264e+10	4.35367e+10	4.8607e+10	5.34534e+10	6.04165e+10	6.00375e+10	5.84187e+10	7.73895e+10	7.05432e+10	8.58377e+10	9.13368e+10	9.79728e+10	1.17146e+11	1.22911e+11	9.28936e+10	8.36206e+10	1.12451e+11	1.45513e+11
British Virgin Islands	VGB	GDP (current US$)	NY.GDP.MKTP.CD
Virgin Islands (U.S.)	VIR	GDP (current US$)	NY.GDP.MKTP.CD																																											3262000000	3443000000	3797000000	4428000000
Viet Nam	VNM	GDP (current US$)	NY.GDP.MKTP.CD																										1.40947e+10	2.63366e+10	3.66581e+10	2.54238e+10	6.2933e+09	6.47174e+09	9.61337e+09	9.86699e+09	1.3181e+10	1.62864e+10	2.07362e+10	2.46575e+10	2.68437e+10	2.72096e+10	2.86837e+10	3.11725e+10	3.26852e+10	3.50641e+10	3.95525e+10	4.54279e+10	5.76333e+10
Vanuatu	VUT	GDP (current US$)	NY.GDP.MKTP.CD																				1.19259e+08	1.21185e+08	1.13782e+08	1.14502e+08	1.1739e+08	1.44483e+08	1.31856e+08	1.26499e+08	1.39464e+08	1.58351e+08	1.54013e+08	1.68879e+08	2.01334e+08	2.09089e+08	2.00492e+08	2.33701e+08	2.49333e+08	2.6137e+08	2.72771e+08	2.62293e+08	2.68007e+08	2.72015e+08	2.57927e+08	2.62597e+08	3.14471e+08	3.64997e+08	3.94962e+08
World	WLD	GDP (current US$)	NY.GDP.MKTP.CD	1.36649e+12	1.44397e+12	1.5449e+12	1.67035e+12	1.83103e+12	1.99523e+12	2.16271e+12	2.29487e+12	2.47982e+12	2.73912e+12	3.00426e+12	3.3199e+12	3.83421e+12	4.68856e+12	5.41951e+12	6.03514e+12	6.56017e+12	7.41644e+12	8.77966e+12	1.01555e+13	1.14528e+13	1.18434e+13	1.17193e+13	1.1963e+13	12427957579028	1.3017e+13	1.53484e+13	17472239624529	1.95248e+13	20395813960211	22922751084575	2.39209e+13	2.5547e+13	2.59749e+13	2.79614e+13	31245419629026	3.1969e+13	3.18706e+13	3.17337e+13	3.27828e+13	3.38982e+13	3.36904e+13	3.49915e+13	3.92433e+13	4.42254e+13	4.79005e+13
Samoa	WSM	GDP (current US$)	NY.GDP.MKTP.CD											4.52083e+07	5.37196e+07	6.25661e+07	8.2453e+07	9.35496e+07	9.34893e+07	8.50031e+07	9.82957e+07	1.08223e+08	1.22257e+08	1.25747e+08	1.18191e+08	1.21222e+08	1.11863e+08	1.09201e+08	9.55722e+07	1.00948e+08	1.11714e+08	1.33016e+08	1.22889e+08	1.25766e+08	1.25597e+08	1.32303e+08	1.33123e+08	2.21098e+08	2.24866e+08	2.49908e+08	2.85476e+08	2.69485e+08	2.55408e+08	2.58856e+08	2.663e+08	2.8179e+08	3.33426e+08	4.07748e+08	4.76802e+08
Kosovo	XKX	GDP (current US$)	NY.GDP.MKTP.CD
Yemen, Rep.	YEM	GDP (current US$)	NY.GDP.MKTP.CD																															1.26438e+10	1.46654e+10	1.79594e+10	2.17368e+10	2.80195e+10	1.27963e+10	6.49616e+09	6.8383e+09	6.32218e+09	7.63933e+09	9.67932e+09	9.85299e+09	1.06934e+10	1.17775e+10	1.38676e+10	1.67316e+10
South Africa	ZAF	GDP (current US$)	NY.GDP.MKTP.CD	8.7486e+09	9.226e+09	9.814e+09	1.08542e+10	1.1956e+10	1.3069e+10	1.42114e+10	1.58214e+10	1.71248e+10	1.9257e+10	2.12184e+10	2.34111e+10	2.45159e+10	3.32628e+10	4.13892e+10	4.29069e+10	4.11505e+10	4.53284e+10	5.16074e+10	6.30387e+10	8.94119e+10	9.31415e+10	8.59041e+10	9.62041e+10	8.48702e+10	6.44594e+10	7.33548e+10	9.65358e+10	1.03977e+11	1.08056e+11	1.26048e+11	1.35204e+11	1.46956e+11	1.47195e+11	1.53513e+11	1.71736e+11	1.63235e+11	1.68978e+11	1.52983e+11	1.51517e+11	1.51753e+11	1.3543e+11	1.29088e+11	1.97019e+11	2.55807e+11	2.88867e+11
Zambia	ZMB	GDP (current US$)	NY.GDP.MKTP.CD	6.9874e+08	6.8236e+08	6.7928e+08	7.0434e+08	8.2264e+08	1.0612e+09	1.239e+09	1.34064e+09	1.57374e+09	1.9264e+09	1.78878e+09	1.65326e+09	1.87242e+09	2.43426e+09	2.91098e+09	2.44267e+09	2.74286e+09	2.5153e+09	2.81103e+09	3.35345e+09	3.88453e+09	4.00813e+09	3.87112e+09	3.32105e+09	2.71952e+09	2.25245e+09	1.66441e+09	2.26525e+09	3.72888e+09	3.99467e+09	3.28838e+09	3.37681e+09	3.18281e+09	3.27351e+09	3.65681e+09	3.80698e+09	3.59722e+09	4.30329e+09	3.53774e+09	3.40428e+09	3.60063e+09	4.09444e+09	4.19385e+09	4.90187e+09	6.22111e+09	8.33187e+09
Zimbabwe	ZWE	GDP (current US$)	NY.GDP.MKTP.CD	1.05353e+09	1.09721e+09	1.11817e+09	1.1601e+09	1.21776e+09	1.31211e+09	1.2824e+09	1.39772e+09	1.48036e+09	1.74889e+09	1.88517e+09	2.17983e+09	2.6791e+09	3.31104e+09	3.98419e+09	4.37353e+09	4.32058e+09	4.36661e+09	4.35382e+09	5.1801e+09	6.68228e+09	8.01546e+09	8.54406e+09	7.76803e+09	6.35537e+09	5.64014e+09	6.2207e+09	6.74466e+09	7.81877e+09	8.29055e+09	8.7883e+09	8646000000	6755000000	6567250000	6894250000	7115000000	8557500000	8534000000	6405250000	6861500000	6693250000	6780750000	6345250000	5730500000	5808500000	5758250000
[truncated: 19 more columns]

## Sheet: POPULATION
Data Source	World Development Indicators
Last Updated Date	2025-12-19
Country Name	Country Code	Indicator Name	Indicator Code	1960	1961	1962	1963	1964	1965	1966	1967	1968	1969	1970	1971	1972	1973	1974	1975	1976	1977	1978	1979	1980	1981	1982	1983	1984	1985	1986	1987	1988	1989	1990	1991	1992	1993	1994	1995	1996	1997	1998	1999	2000	2001	2002	2003	2004	2005
Aruba	ABW	Population, total	SP.POP.TOTL	54922	55578	56320	57002	57619	58190	58694	58990	59069	59052	58950	58781	58047	58299	58349	58295	58368	58580	58776	59191	59909	60563	61276	62228	62901	61728	59931	59159	59331	60443	62753	65896	69005	73685	77595	79805	83021	86301	88451	89659	90588	91439	92074	93128	95138	97635
Africa Eastern and Southern	AFE	Population, total	SP.POP.TOTL	130075728	133534923	137171659	140945536	144904094	149033472	153281203	157704381	162329396	167088245	171984985	177022314	182126556	187524135	193186642	198914573	204802976	210680842	217074286	223974122	230792729	238043099	245822010	253644643	261458202	269450407	277621771	286067346	294498625	302939121	311748681	320442961	329082707	338324002	347441809	356580375	366138524	375646235	385505757	395750933	406156661	416807868	427820358	439173286	450928044	463076637
Afghanistan	AFG	Population, total	SP.POP.TOTL	9035043	9214083	9404406	9604487	9814318	10036008	10266395	10505959	10756922	11017409	11290128	11567667	11853696	12157999	12469127	12773954	13059851	13340756	13611441	13655567	13169311	11937581	10991378	10917982	11190221	11426852	11420074	11387818	11523298	11874088	12045660	12238879	13278974	14943172	16250794	17065836	17763266	18452091	19159996	19887785	20130327	20284307	21378117	22733049	23560654	24404567
Africa Western and Central	AFW	Population, total	SP.POP.TOTL	97630925	99706674	101854756	104089175	106388440	108772632	111246953	113795019	116444636	119203521	122086536	125072948	128176494	131449942	134911581	138569918	142337272	146258576	150402616	154721711	159166518	163762473	168585118	173255157	177880746	182811038	187889141	193104347	198485027	204062274	209566031	215178709	221191375	227246778	233360104	239801875	246415446	253207584	260297834	267506298	274968446	282780717	290841795	299142845	307725100	316588476
Angola	AGO	Population, total	SP.POP.TOTL	5231654	5301583	5354310	5408320	5464187	5521981	5581386	5641807	5702699	5763685	5852788	5991102	6174262	6388528	6613367	6842947	7074664	7317829	7576734	7847207	8133872	8435607	8751648	9082983	9425917	9779120	10139450	10497858	10861291	11238562	11626360	12023529	12423712	12827135	13249764	13699778	14170973	14660413	15159370	15667235	16194869	16747208	17327699	17943712	18600423	19291161
Albania	ALB	Population, total	SP.POP.TOTL	1608800	1659800	1711319	1762621	1814135	1864791	1914573	1965598	2022272	2081695	2135479	2187853	2243126	2296752	2350124	2404831	2458526	2513546	2566266	2617832	2671997	2726056	2784278	2843960	2904429	2964762	3022635	3083605	3142336	3227943	3286542	3266790	3247039	3227287	3207536	3187784	3168033	3148281	3128530	3108778	3089027	3060173	3051010	3039616	3026939	3011487
Andorra	AND	Population, total	SP.POP.TOTL	9510	10283	11086	11915	12764	13634	14626	15837	17176	18555	19977	21442	22957	24523	26130	27773	29436	31097	32735	34306	35782	37169	38764	40565	42273	43825	45734	47653	49416	50620	52597	56667	60200	63272	64612	63912	63984	64700	65382	65710	65685	65852	66506	69486	74325	77421
Arab World	ARB	Population, total	SP.POP.TOTL	91540853	93931683	96428599	99038509	101729760	104494008	107403055	110491709	113712171	117053219	120469263	123950810	127535560	131335660	135282861	139495837	144014135	148599336	153568663	159054118	164657321	170015485	175370356	180973288	186733957	192563243	198509771	204524595	210269696	215969068	223184294	228402316	234321565	240926205	247626514	253952538	260229121	266565183	273094199	279709634	286548096	293580252	300691509	307815105	315060277	322628451
United Arab Emirates	ARE	Population, total	SP.POP.TOTL	131334	137989	144946	152211	159692	167103	173976	179700	199416	239660	286536	335027	385014	436399	489087	542856	615866	710209	809274	912010	1015700	1099855	1166370	1235305	1305996	1377911	1467383	1574244	1681788	1789851	1898220	2006626	2114730	2222093	2328188	2434662	2597564	2817410	3040421	3266009	3493575	3723590	3956826	4192457	4428967	4664790
Argentina	ARG	Population, total	SP.POP.TOTL	20386045	20726276	21072538	21421705	21769453	22112629	22453893	22799059	23150583	23508711	23878327	24257208	24644328	25046005	25461351	25874107	26282283	26701805	27132158	27568895	28011596	28463959	28924262	29391332	29863093	30336441	30811980	31291762	31780532	32270948	32755901	33230294	33693527	34152717	34613491	35070020	35513793	35947791	36372860	36794682	37213984	37624825	38029349	38424282	38815916	39216789
Armenia	ARM	Population, total	SP.POP.TOTL	1863705	1927484	1991689	2056023	2120135	2183635	2246159	2307492	2367319	2424030	2475633	2525345	2577079	2630860	2686445	2743660	2818165	2912827	3012807	3078501	3107415	3135349	3163144	3191539	3224547	3260432	3294847	3328520	3355125	3443100	3552128	3613977	3571861	3453332	3364610	3307581	3278735	3246289	3208401	3167286	3221100	3211800	3199800	3182500	3164900	3146400
American Samoa	ASM	Population, total	SP.POP.TOTL	20133	20666	21298	21966	22673	23406	24136	24863	25614	26375	27026	27533	27995	28436	28875	29390	29959	30521	31076	31611	32403	33584	34909	36271	37667	39103	40571	42072	43615	45191	46640	47882	49038	50159	51251	52316	53353	54362	55334	56248	56855	57053	57062	56971	56818	56617
Antigua and Barbuda	ATG	Population, total	SP.POP.TOTL	55603	56540	57336	58138	59020	59970	60900	61837	62809	63819	64528	64729	64615	64342	64058	63839	63762	63862	64038	64274	64513	64665	64785	64934	64882	64591	64276	63946	63623	63325	63066	63387	64404	65587	66843	68189	69612	71053	72412	73666	74912	76069	77032	77884	78719	79611
Australia	AUS	Population, total	SP.POP.TOTL	10276477	10483000	10742000	10950000	11167000	11388000	11651000	11799000	12009000	12263000	12507000	12937000	13177000	13380000	13723000	13893000	14033000	14192000	14358000	14514000	14692000	14923260	15184247	15393472	15579391	15788312	16018350	16263874	16532164	16814416	17065128	17284036	17478635	17634808	17805468	18004882	18224767	18423037	18607584	18812264	19028802	19274701	19495210	19720737	19932722	20176844
Austria	AUT	Population, total	SP.POP.TOTL	7047539	7086299	7129864	7175811	7223801	7270889	7322066	7376998	7415403	7441055	7467086	7500482	7544201	7586115	7599038	7578903	7565525	7568430	7562305	7549425	7549433	7568710	7574140	7561910	7561434	7564985	7569794	7574586	7585317	7619567	7677850	7754891	7840709	7905633	7936118	7948278	7959017	7968041	7976789	7992324	8011566	8042293	8081957	8121423	8171966	8227829
Azerbaijan	AZE	Population, total	SP.POP.TOTL	3894500	4045750	4168150	4293550	4439250	4574650	4708150	4832000	4948500	5063300	5172050	5282950	5391450	5493900	5594100	5689050	5781000	5876150	5976150	6071300	6160500	6257750	6357550	6459800	6567850	6670150	6770300	6875350	6974600	7076550	7175200	7271300	7382050	7494800	7596550	7684850	7763000	7838250	7913000	7982750	8048600	8111200	8171950	8234100	8306500	8391850
Burundi	BDI	Population, total	SP.POP.TOTL	2764258	2835119	2907943	2969841	3055650	3141367	3217960	3300690	3380387	3454590	3530432	3617289	3617128	3611991	3703590	3796612	3882626	3983582	4100338	4203530	4383706	4566014	4681390	4808528	4926465	5034042	5129414	5247787	5365327	5471706	5587052	5703857	5858407	5676843	5713854	6066316	6070506	6070042	6187108	6337155	6470194	6634365	6824132	7043154	7310656	7587299
Belgium	BEL	Population, total	SP.POP.TOTL	9153489	9183948	9220578	9289770	9378113	9463667	9527807	9580991	9618756	9646032	9655549	9673162	9711115	9741720	9772419	9800700	9818227	9830358	9839534	9848382	9859242	9858982	9856303	9855520	9855372	9858308	9861823	9870234	9901664	9937697	9967379	10004486	10045158	10084475	10115603	10136811	10156637	10181245	10203008	10226419	10251250	10286570	10332785	10376133	10421137	10478617
Benin	BEN	Population, total	SP.POP.TOTL	2517286	2559223	2604659	2652908	2704003	2757936	2814317	2872997	2934257	2998222	3065057	3134767	3207543	3283496	3362633	3445407	3532196	3623202	3718305	3818528	3925251	4038307	4156596	4278978	4405895	4538012	4675420	4818486	4967341	5121657	5281479	5446932	5617844	5872706	6096506	6226773	6391858	6583365	6789489	7002818	7221619	7445596	7675426	7913070	8159094	8426144
Burkina Faso	BFA	Population, total	SP.POP.TOTL	4778621	4848224	4919672	4993623	5071034	5152833	5237933	5326348	5418644	5513177	5610304	5707999	5807234	5911927	6024904	6147569	6280635	6428734	6590984	6763903	6947900	7140271	7340197	7551129	7772256	7999935	8228847	8457109	8687435	8921175	9159356	9394632	9629275	9871713	10123798	10386722	10655942	10934223	11240664	11574928	11925546	12295001	12680897	13082532	13500533	13932123
Bangladesh	BGD	Population, total	SP.POP.TOTL	51828660	53310348	54881146	56504402	58178374	59902519	61669806	63510929	65408276	67294133	69058894	70276758	71641519	73722294	75839348	77854351	79855318	81867264	83889655	85935072	88016432	90303105	92814507	95335155	97814966	100253825	102635572	104959291	107216008	109433799	111633717	113787109	115952192	118132360	120343179	122600370	124862179	127198069	129622332	132108065	134544304	136805810	138933658	140970351	142902856	144715786
Bulgaria	BGR	Population, total	SP.POP.TOTL	7867374	7943118	8012946	8078145	8144340	8204168	8258057	8310226	8369603	8434172	8489574	8536395	8576200	8620967	8678745	8720742	8758599	8804183	8814032	8825940	8861535	8891117	8917457	8939738	8960679	8960547	8958171	8971359	8981446	8876972	8718289	8632367	8540164	8472313	8443591	8406067	8362826	8312068	8256786	8210624	8170172	8009142	7837161	7775327	7716860	7658972
Bahrain	BHR	Population, total	SP.POP.TOTL	165477	172346	179349	186501	193816	200866	207543	214189	219337	222469	224809	230733	242113	255320	269038	283243	297863	312823	328046	343457	358978	373524	386983	400707	415154	430358	446286	462854	479929	497327	514797	503052	516458	530225	544366	558879	573792	589115	604842	620989	637582	661316	710553	764517	823741	888822
Bahamas, The	BHS	Population, total	SP.POP.TOTL	116317	122197	128493	135087	141528	147952	154874	162267	170089	177981	184982	190857	196055	200791	205342	209886	214501	219157	223761	228230	232526	236614	240614	244698	248863	253154	257536	261935	266448	271178	275945	280731	285927	291339	296509	301461	306268	310904	315368	319614	323835	327836	331614	335618	339782	343894
Bosnia and Herzegovina	BIH	Population, total	SP.POP.TOTL	3281381	3348035	3407532	3461942	3513441	3562834	3610562	3656223	3698794	3737765	3773247	3809376	3848271	3887376	3926472	3965743	4004552	4042124	4078240	4113300	4148426	4184217	4221100	4258728	4295536	4330364	4362115	4390246	4414404	4433983	4448652	4458343	4234616	3904482	3725412	3715564	3875246	4018227	4089356	4130305	4159771	4179438	4188002	4178523	4140987	4096493
Belarus	BLR	Population, total	SP.POP.TOTL	8198000	8271216	8351928	8437232	8524224	8610000	8696496	8785648	8874552	8960304	9040000	9115576	9188968	9257272	9317584	9367000	9411000	9463000	9525000	9584000	9643000	9710000	9776000	9843000	9910000	9975000	10043000	10111000	10140000	10170000	10189348	10194050	10216470	10239050	10226955	10193831	10159569	10117433	10071963	10026738	9979610	9928549	9865548	9796749	9730146	9663915
Belize	BLZ	Population, total	SP.POP.TOTL	91318	93632	96042	98704	101603	104675	107906	111272	114713	118040	120736	122805	124676	126445	128185	130387	133099	135887	138713	141678	145062	148786	152548	156297	160044	163796	167554	171338	175180	179107	183076	187040	190983	194902	199097	204146	210310	217446	225173	233059	240799	248379	256009	263780	271688	279731
Bermuda	BMU	Population, total	SP.POP.TOTL	42208	43123	44239	45340	46410	47461	48534	49514	50404	51306	52124	52607	52803	52946	53056	53129	53210	53322	53431	53517	53673	53997	54387	54777	55169	55547	55889	56265	56699	57129	57559	57984	58407	58816	59194	59526	59813	60177	60639	61124	61550	61867	62142	62386	62555	62711
Bolivia	BOL	Population, total	SP.POP.TOTL	3702323	3778731	3857493	3938913	4022996	4109796	4199550	4292572	4388944	4488232	4590010	4694342	4800978	4910200	5022475	5137539	5256496	5379166	5504123	5630849	5758900	5888109	6018088	6149060	6281868	6416185	6552479	6692162	6835508	6981766	7130142	7280289	7430336	7579195	7727322	7874676	8021736	8167900	8313394	8459806	8606326	8752736	8900355	9050700	9204287	9360754
Brazil	BRA	Population, total	SP.POP.TOTL	72388126	74605447	76865323	79164235	81488595	83817583	86139359	88446124	90741240	93045777	95375651	97739273	100146797	102600976	105089675	107619565	110213349	112875292	115600942	118380821	121207461	124063109	126923155	129790077	132658864	135515595	138336370	141104944	143826357	146502972	149143223	151724256	154275079	156794577	159265006	161735073	164202549	166661659	169159655	171641543	174018282	176301203	178503484	180622688	182675143	184688101
Barbados	BRB	Population, total	SP.POP.TOTL	230893	233148	235224	237557	239958	242417	244996	247091	248540	249444	249387	249168	249658	250322	250777	251175	251442	251626	251551	251269	251524	252270	253095	253992	254920	255820	256618	257279	257763	258109	258582	259373	260267	261027	261620	262039	262284	262392	262436	262517	262063	262425	264148	265776	267298	268706
Brunei Darussalam	BRN	Population, total	SP.POP.TOTL	88347	92517	96719	101159	105922	110838	115874	121017	126222	131446	135138	137921	142189	147369	152656	158070	163607	169277	174884	180422	186111	191977	198165	204741	211661	218919	226495	233860	240913	248064	255292	262596	269839	276971	284091	291195	298276	305341	312385	319411	326424	333345	340099	346637	352911	358916
Bhutan	BTN	Population, total	SP.POP.TOTL	224084	230602	237636	245156	252987	261200	269820	278852	288311	298214	308528	319211	330264	341705	353538	365791	378490	391639	405243	419200	433404	447836	462485	477460	492784	508392	524324	540557	556986	573586	589287	599784	577774	554673	554497	547989	548784	558697	569435	582579	596863	610794	624409	637663	650544	661865
Botswana	BWA	Population, total	SP.POP.TOTL	516165	527942	540186	552966	566266	574664	577866	580933	583966	587066	590334	600481	622407	652408	685448	720380	758508	799574	849239	901742	937485	969996	1009269	1046137	1083660	1121945	1160650	1199167	1235476	1270274	1305696	1341756	1380033	1420115	1460023	1498836	1535914	1571691	1606899	1641997	1677382	1712254	1744763	1775736	1807146	1839877
Central African Republic	CAF	Population, total	SP.POP.TOTL	1702346	1734580	1768115	1803063	1839583	1877854	1918082	1960444	2005100	2051515	2097505	2141450	2183769	2226008	2269338	2313916	2348566	2372930	2397961	2423794	2450535	2478402	2507375	2537399	2568610	2600932	2634258	2669155	2713965	2783970	2871910	2963191	3058831	3157839	3257954	3348052	3435965	3531700	3628827	3729450	3833416	3919487	4006077	4103086	4192826	4288810
Canada	CAN	Population, total	SP.POP.TOTL	17909356	18271000	18614000	18964000	19325000	19678000	20048000	20412000	20744000	21028000	21324000	21962032	22218463	22491777	22807969	23143275	23449808	23725843	23963203	24201544	24515667	24819915	25116942	25366451	25607053	25842116	26100278	26446601	26791747	27276781	27691138	28037420	28371264	28684764	29000663	29302311	29610218	29905948	30155173	30401286	30685730	31020855	31359199	31642461	31938807	32242732
Central Europe and the Baltics	CEB	Population, total	SP.POP.TOTL	91401309	92231375	93008589	93840016	94715795	95440988	96146336	97043270	97884022	98606630	99134548	99635258	100357161	101112680	101939916	102860571	103776068	104616884	105329397	105948616	106541316	107129392	107730380	108297837	108838073	109338285	109824166	110296425	110686740	110801640	110743128	110469467	110111454	110041924	110021594	109864246	109626194	109422013	109238340	109060951	108447824	107660041	106959751	106624167	106331716	106041911
Switzerland	CHE	Population, total	SP.POP.TOTL	5327827	5434294	5573815	5694247	5789228	5856472	5918002	5991785	6067714	6136387	6180877	6213399	6260956	6307347	6341405	6338632	6302504	6281174	6281738	6294365	6319408	6354074	6391309	6418773	6441865	6470365	6504124	6545106	6593386	6646912	6715519	6799978	6875364	6938265	6993795	7040687	7071850	7088906	7110001	7143991	7184250	7229854	7284753	7339001	7389625	7437115
Channel Islands	CHI	Population, total	SP.POP.TOTL	110808	111782	112953	114234	115561	116879	118186	119505	120793	122039	123288	124555	125764	126873	127893	128781	129391	129726	129981	130220	130462	131078	132172	133413	134727	136075	137413	138743	140089	141501	143087	144269	144733	144984	145163	145247	145565	146214	146906	147554	148110	148850	149881	150960	152039	153126
Chile	CHL	Population, total	SP.POP.TOTL	8153350	8324802	8497059	8670144	8842525	9012938	9181722	9348939	9514716	9680282	9845344	10009701	10174678	10340362	10505817	10671559	10838251	11005519	11172695	11339779	11508550	11678717	11850214	12026138	12207733	12395274	12588914	12790150	12999424	13215005	13437176	13662491	13884577	14102276	14316256	14527381	14734046	14932434	15127799	15319313	15503635	15683849	15857925	16024752	16187322	16348778
China	CHN	Population, total	SP.POP.TOTL	667070000	660330000	665770000	682335000	698355000	715185000	735400000	754550000	774510000	796025000	818315000	841105000	862030000	881940000	900350000	916395000	930685000	943455000	956165000	969005000	981235000	993885000	1008630000	1023310000	1036825000	1051040000	1066790000	1084035000	1101630000	1118650000	1135185000	1150780000	1164970000	1178440000	1191835000	1204855000	1217550000	1230075000	1241935000	1252735000	1262645000	1271850000	1280400000	1288400000	1296075000	1303720000
Cote d'Ivoire	CIV	Population, total	SP.POP.TOTL	3673666	3810151	3956939	4112061	4273952	4442377	4617519	4799744	4990021	5192221	5411567	5650868	5909716	6184944	6474057	6776297	7057958	7321950	7603130	7902267	8220714	8556596	8907936	9272744	9650516	10040483	10440917	10851475	11275189	11719771	12189778	12683870	13200310	13735951	14287201	14855565	15442312	16047170	16663948	17215935	17699004	18178913	18654771	19125542	19595000	20068458
Cameroon	CMR	Population, total	SP.POP.TOTL	5159057	5239273	5338620	5456623	5578257	5704686	5837295	5977318	6125863	6283462	6449793	6624408	6806872	6996660	7193583	7397120	7597962	7796501	8011921	8239641	8512219	8816377	9028678	9215397	9475078	9761730	10060342	10370749	10684968	11002745	11331821	11667180	12006353	12353131	12704903	13058516	13414757	13775214	14144860	14525140	14912631	15309490	15725528	16160340	16610487	17074594
Congo, Dem. Rep.	COD	Population, total	SP.POP.TOTL	15264846	15662374	16075724	16507599	16955327	17427802	17931929	18462782	19012189	19570445	20137436	20695569	21251160	21827665	22418878	23021101	23624031	24229061	24992689	25886782	26711099	27500515	28338190	29250963	30245081	31264816	32265196	33298904	34382752	35486866	36684063	37925817	39228910	40656336	42626876	44433704	45296124	46029902	47297600	48912971	50507442	52132646	53750524	55343867	56997741	58775724
Congo, Rep.	COG	Population, total	SP.POP.TOTL	1056732	1084389	1113175	1143263	1174816	1207880	1242534	1278691	1316519	1356182	1397638	1441039	1486468	1533680	1582301	1627032	1667225	1707568	1748089	1788524	1828985	1869759	1910430	1950321	1999528	2059311	2120602	2183473	2247653	2313558	2380560	2449229	2519465	2595124	2673144	2749461	2826785	2887862	2952061	3032874	3151345	3272537	3350771	3445753	3565554	3696393
Colombia	COL	Population, total	SP.POP.TOTL	15606209	16095203	16599029	17113823	17637411	18169050	18702688	19235618	19766796	20291942	20811782	21319096	21819563	22325374	22833469	23344644	23858810	24393494	24950337	25515626	26104498	26713267	27338331	27988173	28642690	29268470	29879112	30499467	31130524	31776279	32440069	33098372	33760571	34441473	35127410	35804662	36462745	37121149	37792165	38454863	39089934	39709262	40324680	40937429	41543171	42128977
Comoros	COM	Population, total	SP.POP.TOTL	197700	201201	204702	208185	211644	214967	218663	223859	230244	237001	244185	251865	260077	268820	278075	287692	297538	307579	317688	327791	337721	347382	357139	367233	377637	388352	399318	410439	421687	433103	444596	455556	465113	473682	482142	490586	499107	507777	516597	525886	536080	547220	558923	569798	580704	592677
Cabo Verde	CPV	Population, total	SP.POP.TOTL	210024	215087	221919	229373	237006	244856	252976	261404	270164	279248	287885	294046	297386	299881	302570	305847	309455	312834	316147	319480	323301	327846	332724	337654	342505	347365	352312	357302	362329	367803	375428	384586	393415	401965	410228	418104	425581	432798	439784	446519	453317	460293	467046	473383	479370	485115
Costa Rica	CRI	Population, total	SP.POP.TOTL	1327496	1377920	1429445	1481604	1533960	1586208	1638116	1689523	1739731	1789276	1838949	1888539	1938248	1988343	2039643	2092719	2147774	2205025	2264510	2326490	2390633	2456637	2524806	2595153	2667595	2741894	2817216	2892699	2968103	3043827	3121706	3202176	3284258	3367434	3451122	3535176	3619013	3701711	3782838	3862101	3937739	4008947	4075705	4138784	4200078	4261240
Caribbean small states	CSS	Population, total	SP.POP.TOTL	2558348	2614258	2670187	2728278	2784804	2839698	2894435	2948759	3002786	3055925	3104308	3148560	3185617	3215024	3242803	3269733	3296410	3322722	3348386	3373242	3399087	3425354	3450895	3476621	3502418	3530570	3559870	3586018	3610609	3634409	3654949	3677765	3706523	3735156	3763806	3795917	3829184	3861673	3893594	3925229	3956229	3987087	4018796	4050990	4080569	4049468
Cuba	CUB	Population, total	SP.POP.TOTL	7238081	7387117	7541098	7701660	7866020	8030797	8193450	8352625	8509522	8666640	8824382	8979085	9123891	9255328	9374183	9479726	9571242	9648440	9711980	9763355	9804796	9849320	9912681	9991026	10073299	10157228	10244247	10335342	10432585	10533243	10631799	10717640	10785801	10841031	10886021	10925362	10962010	10997934	11034712	11072230	11109109	11144132	11177418	11209383	11238756	11262554
Curacao	CUW	Population, total	SP.POP.TOTL	124826	126125	128414	130860	133148	135266	136682	138140	140298	142581	144739	147389	147710	146912	148351	149129	149399	149459	148341	147851	148041	148629	150101	151159	151940	152711	152662	151456	149254	146937	145400	144403	143912	144299	144630	145139	146306	146956	144472	139428	133860	129047	129205	131897	134192	137658
Cayman Islands	CYM	Population, total	SP.POP.TOTL	8428	8601	8781	8970	9166	9361	9560	9769	9971	10165	10517	11098	11764	12438	13114	13788	14454	15105	15727	16351	17079	17905	18750	19598	20454	21324	22197	23073	23951	24874	25999	27294	28621	29976	31352	32743	34143	35543	36922	38284	39674	41089	42514	43934	45352	46788
Cyprus	CYP	Population, total	SP.POP.TOTL	586490	595514	601466	607252	612521	617736	623390	629251	635157	641189	647446	654050	661063	665937	663254	659405	662032	667101	672249	677549	683076	688893	696497	707225	719334	731277	743105	754785	766235	777420	788351	798944	810341	826034	844667	862695	880290	897568	914548	931234	947667	964127	981440	999590	1017875	1036151
Czechia	CZE	Population, total	SP.POP.TOTL	9602006	9586651	9624660	9670685	9727804	9779358	9821040	9852899	9876346	9896580	9858071	9826815	9867632	9922266	9988459	10058620	10125939	10186755	10242098	10292341	10304193	10300591	10314826	10323856	10330213	10337118	10342227	10347318	10355276	10361068	10333355	10308578	10319123	10329855	10333587	10327253	10315241	10304131	10294373	10283860	10255063	10216605	10196916	10193998	10197101	10211216
Germany	DEU	Population, total	SP.POP.TOTL	72814900	73377632	74025784	74714353	75318337	75963695	76600311	76951336	77294314	77909682	78169289	78312842	78688452	78936666	78967433	78673554	78336950	78159814	78091820	78126350	78288576	78407907	78333366	78128282	77858685	77684873	77720436	77839920	78144619	78751283	79433029	80013896	80624598	81156363	81438348	81678051	81914831	82034771	82047195	82100243	82211508	82349925	82488495	82534176	82516260	82469422
Djibouti	DJI	Population, total	SP.POP.TOTL	86024	89390	93283	97872	103198	109092	115269	121649	128250	136078	145175	155136	166256	178449	192613	209908	230737	254613	280031	304513	325815	343047	356880	369553	384053	402687	426341	454399	484523	523355	579538	631092	626010	614245	626710	633074	648348	671817	699352	724218	747318	771313	795574	813519	826124	839167
Dominica	DMA	Population, total	SP.POP.TOTL	59372	60209	60948	61739	62587	63505	64507	65585	66732	67934	68908	69532	70060	70585	71091	71570	72017	72406	72724	72959	73083	72986	72688	72365	72056	71744	71406	71023	70608	70153	69627	69296	69325	69433	69477	69469	69410	69299	69124	68870	68511	68288	68367	68531	68649	68734
Denmark	DNK	Population, total	SP.POP.TOTL	4579603	4611687	4647727	4684483	4722072	4759012	4797381	4835354	4864883	4891860	4928757	4963126	4991596	5021861	5045297	5059862	5072596	5088419	5104248	5116801	5123027	5121572	5117810	5114297	5111619	5113691	5120534	5127024	5129516	5132594	5140939	5154298	5171370	5188628	5206180	5233373	5263074	5284991	5304219	5321799	5339616	5358783	5375931	5390574	5404523	5419432
Dominican Republic	DOM	Population, total	SP.POP.TOTL	3268336	3373233	3479936	3588287	3698559	3808963	3921847	4038928	4157189	4277035	4399290	4524234	4651883	4782227	4914197	5046776	5180404	5315443	5451882	5589690	5729037	5868453	6007114	6147248	6289040	6430404	6571208	6712515	6855734	7002295	7151166	7299853	7447474	7594572	7741694	7888115	8032894	8174078	8310362	8446208	8584190	8720283	8852235	8980620	9104892	9225034
Algeria	DZA	Population, total	SP.POP.TOTL	11424922	11628883	11800771	11982118	12179813	12365976	12590069	12876118	13172614	13475960	13783719	14098936	14427072	14771147	15133502	15678596	16409170	17015994	17506974	18036655	18607174	19220704	19872348	20558115	21271969	22008544	22745499	23443624	24109536	24754485	25375810	25987928	26628568	27277048	27887279	28470191	29033044	29579301	30054133	30474354	30903893	31331221	31750835	32175818	32628286	33109249
East Asia & Pacific (excluding high income)	EAP	Population, total	SP.POP.TOTL	895961535	895534581	907473022	930810837	953783472	977366928	1004271490	1030471073	1057697808	1086662478	1116395242	1146649477	1175176176	1202715705	1228688547	1252174248	1273922384	1294303118	1314775496	1335637622	1356226475	1377473854	1401081634	1424971585	1447871073	1471340337	1496124294	1522374575	1549038591	1575101307	1600739173	1625498444	1648872786	1671604370	1694244506	1716602413	1738632397	1760512371	1781546477	1800932833	1819011507	1836260943	1852659155	1868409996	1883675167	1898853723
Early-demographic dividend	EAR	Population, total	SP.POP.TOTL	968909356	994176841	1020130725	1046697479	1074021283	1101264258	1128474732	1156817324	1185936827	1215536741	1245960808	1276141826	1307009646	1339671375	1373219822	1407636737	1442753987	1478479688	1514572817	1552194676	1591961664	1634107159	1677532811	1721104015	1765269111	1810019176	1855391159	1901405537	1947928955	1994666990	2044241467	2092102478	2138854231	2184656122	2228719169	2273692181	2321284245	2369042441	2416119734	2462704115	2509431470	2556335424	2601917557	2647109296	2693184997	2738846905
East Asia & Pacific	EAS	Population, total	SP.POP.TOTL	1042818620	1044749888	1059216594	1085095424	1110651177	1136869154	1166223463	1194633135	1224397449	1256167955	1288721548	1322856516	1354228289	1384605041	1413496627	1439634332	1463747757	1486397441	1509073118	1532261700	1555055871	1578588756	1604460320	1630462798	1655263328	1680467718	1706848439	1734703629	1762936165	1790597018	1817735909	1844189975	1869074614	1893258583	1917389243	1941185229	1964830092	1988067577	2010443502	2030912462	2050149617	2068682053	2086144389	2102761941	2118747885	2134573057
Europe & Central Asia (excluding high income)	ECA	Population, total	SP.POP.TOTL	128810451	131617926	134400419	137187829	139973968	142668572	145371529	148087983	150777578	153462746	155918823	158428591	161049046	163601189	166121814	168594458	171119860	173726978	176315643	178774505	181309432	183746315	186272610	188979984	191755370	194525195	197344981	200194022	202990335	205733205	208212866	210169114	212032319	213395945	214329901	215114964	216002100	216672059	217104725	217579952	218486598	219435056	220400259	221399692	222413290	223360135
Europe & Central Asia	ECS	Population, total	SP.POP.TOTL	667887356	675548634	683341199	691189404	699058435	706683416	713443573	720146318	726634174	733044421	738724073	744432963	750728655	756775460	762546552	768080678	773619713	779117798	784556247	789862141	795362835	800542417	805247476	809947364	814856984	819874109	825034695	830294805	835601587	840881506	845290251	849169385	852664501	855554222	857724587	859504754	861073426	862335057	863317613	864306932	865392479	866590696	868234843	870529446	873069464	875563919
Ecuador	ECU	Population, total	SP.POP.TOTL	4590891	4722331	4859269	5001716	5149918	5303963	5463748	5629057	5799680	5975236	6155387	6340052	6529034	6722033	6918573	7118251	7320912	7526819	7736167	7948869	8165877	8386910	8611298	8840417	9074782	9311154	9545998	9779290	10010808	10241852	10473673	10702380	10930128	11154274	11372197	11590514	11810950	12031127	12251184	12470795	12689206	12910740	13138472	13372306	13608701	13846163
Egypt, Arab Rep.	EGY	Population, total	SP.POP.TOTL	26896479	27600898	28337013	29091869	29858922	30629174	31406541	32196360	32998319	33811615	34623990	35433368	36258328	37102043	37969667	38875327	39795557	40748870	41761431	42818628	43950413	45147224	46407611	47786402	49247334	50734968	52206295	53674435	55187681	56710642	58396618	60028997	61480660	62915681	64285589	65652622	67028048	68431740	69943294	71520954	73083284	74652029	76239137	77853548	79477443	81101004
Euro area	EMU	Population, total	SP.POP.TOTL	270148970	272472951	274815182	277205348	279621056	282028347	284299197	286298506	288206171	290179378	291834356	293516097	295527442	297413652	299065145	300516726	301804324	303021757	304275086	305541545	306894340	308127421	308901125	309543455	310046458	310617659	311372728	312223048	313272522	314634075	316087007	317407910	318742973	320053176	321024031	321808185	322568383	323306275	323976358	324781951	325789631	326861195	328469678	330286340	332140117	333897752
Eritrea	ERI	Population, total	SP.POP.TOTL	972547	995573	1019788	1045092	1071287	1098335	1124957	1152339	1181737	1212005	1243453	1276154	1309235	1342669	1375688	1408210	1443807	1482565	1522378	1563332	1605797	1649939	1695461	1736160	1771730	1807816	1845164	1888669	1938255	1987017	2032737	1919571	1798748	1856006	1913915	2025267	2128464	2152135	2180419	2212780	2247031	2312079	2392978	2493903	2598284	2661215
Spain	ESP	Population, total	SP.POP.TOTL	30455000	30739250	31023366	31296651	31609195	31954292	32283194	32682947	33113134	33441054	33814531	34224490	34604469	34988947	35373335	35757900	36137812	36511638	36864898	37191330	37491165	37758631	37986012	38171525	38330364	38469512	38584624	38684815	38766939	38827764	38867322	38966376	39157685	39361262	39549108	39724050	39889852	40057389	40223509	40386875	40567864	40850412	41431558	42187645	42921895	43653155
Estonia	EST	Population, total	SP.POP.TOTL	1211537	1225077	1241623	1258857	1277086	1294566	1308597	1318946	1331214	1345249	1360076	1376955	1392518	1405951	1418169	1429352	1439576	1450211	1460188	1468333	1477219	1487666	1498414	1508745	1518617	1528781	1540190	1552221	1561900	1568131	1569174	1561314	1533091	1494128	1462514	1436634	1415594	1399535	1386156	1390244	1396985	1388115	1379350	1370720	1362550	1354775
Ethiopia	ETH	Population, total	SP.POP.TOTL	21376693	21906102	22465126	23051637	23666548	24310612	24952689	25620276	26337930	27072571	27829128	28600106	29374608	30166785	30957273	31723252	32534418	33167272	33734592	34238652	34428514	35304012	36701290	37740817	38735722	39842136	41037656	42460039	44150825	45879690	47609755	49717198	51853747	53708891	55611508	57537335	59467635	61404539	63363524	65374561	67411494	69487762	71635517	73832663	76077206	78367470
European Union	EUU	Population, total	SP.POP.TOTL	357710476	360681613	363707978	366840786	370055037	373129199	376058575	378902917	381579577	384226226	386406167	388553371	391197266	393739994	396124649	398397694	400490355	402445831	404312949	406112162	407986180	409724709	410988238	412072128	412998350	413962998	415087013	416296769	417653885	419102379	420525030	421741276	422968989	424344744	425404352	426210050	426905134	427547651	428120105	428825949	429339162	429909307	430924112	432512916	434193248	435789139
Fragile and conflict affected situations	FCS	Population, total	SP.POP.TOTL	244461631	249737371	255228141	260895002	266719458	272676376	278749755	284996969	291464978	298094137	304858040	311844505	319025117	326527998	334361510	342377291	350583131	358846637	367727720	376996705	385675261	393958598	402886924	412313057	422123181	432271865	442386405	452678880	463045466	473853393	486723712	497970454	510691966	524592905	539513196	554041514	566796346	579354582	592889780	607064140	621080692	635481068	651226758	667644273	684007365	700820603
Finland	FIN	Population, total	SP.POP.TOTL	4429634	4461005	4491443	4523309	4548543	4563732	4580869	4605744	4626469	4623785	4606307	4612124	4639657	4666081	4690574	4711440	4725664	4738902	4752528	4764690	4779535	4799964	4826933	4855787	4881803	4902206	4918154	4932123	4946481	4964371	4986431	5013740	5041992	5066447	5088333	5107790	5124573	5139835	5153498	5165474	5176209	5188008	5200598	5213014	5228172	5246096
Fiji	FJI	Population, total	SP.POP.TOTL	404887	417406	430536	444276	458324	472575	486487	498873	510002	520797	531188	541121	550499	559222	567489	575906	585534	597805	612091	626862	641975	657471	673414	689835	706716	723761	739306	750540	758697	766321	773316	779656	785346	790369	794771	798746	803789	812139	822258	831828	840909	849596	858049	866286	874366	882379
France	FRA	Population, total	SP.POP.TOTL	47412964	47905982	48389516	48877567	49401492	49877725	50311637	50722791	51112980	51536014	52007169	52499553	52962356	53392161	53746571	54002853	54232383	54486467	54734030	54979851	55274184	55603353	55806789	56108330	56383085	56665619	56956002	57266167	57598186	57943062	58261012	58554242	58846584	59103094	59324863	59541294	59754504	59968066	60190684	60501986	60918661	61364377	61812142	62249855	62707588	63180854
Faroe Islands	FRO	Population, total	SP.POP.TOTL	34127	34557	34963	35391	35847	36347	36816	37202	37560	37907	38269	38703	39172	39636	40106	40568	41020	41468	41968	42521	43072	43626	44171	44670	45141	45707	46131	46701	47355	47958	47740	47447	47287	46474	44695	43611	43581	44132	44674	45146	45754	46635	47335	48032	48384	48359
Micronesia, Fed. Sts.	FSM	Population, total	SP.POP.TOTL	43061	44610	46218	47744	49181	50684	52258	53846	55457	57145	58922	60636	62278	63986	65749	67428	69049	70753	72754	75054	77407	79794	82219	84680	87176	89707	92266	94844	97097	99003	100888	102754	104806	107066	109075	110230	110710	111071	111377	111680	112044	112365	112448	112285	111925	111412
Gabon	GAB	Population, total	SP.POP.TOTL	512316	518266	524649	531452	538657	546308	554463	563108	572257	583276	595846	608348	620960	633995	647691	662197	677628	693984	711245	729375	748389	768385	789286	811005	833501	856726	880705	905479	931020	957138	983734	1010818	1038380	1066405	1094720	1123213	1152015	1181439	1211736	1243016	1275572	1309589	1345135	1382350	1421609	1463495
United Kingdom	GBR	Population, total	SP.POP.TOTL	52400000	52800000	53250000	53650000	54000000	54348050	54648500	54943600	55211700	55441750	55663250	55896223	56086065	56194527	56229974	56225800	56211968	56193492	56196504	56246951	56314216	56333829	56313641	56332848	56422072	56550268	56681396	56802050	56928327	57076711	57247586	57424897	57580402	57718614	57865745	58019030	58166950	58316954	58487141	58682466	58892514	59119673	59370479	59647577	59987905	60401206
Georgia	GEO	Population, total	SP.POP.TOTL	3645600	3703600	3760300	3816100	3870300	3921600	3966700	4005800	4042300	4080300	4119900	4163000	4205300	4242500	4279500	4311200	4342400	4372100	4397700	4430200	4467700	4504500	4542800	4582900	4622200	4662900	4704500	4743500	4790700	4803300	4802000	4835900	4873500	4911100	4836076	4657722	4491699	4349913	4243607	4157192	4077131	4014373	3978515	3951736	3927340	3902469
Ghana	GHA	Population, total	SP.POP.TOTL	6961215	7162667	7337375	7514714	7695739	7882606	8074521	8271913	8475729	8690383	8925813	9176264	9438187	9714617	10000523	10294308	10594913	10911871	11248450	11597255	11941448	12281712	12643819	13029836	13370590	13661229	13965217	14289108	14636568	15006813	15394648	15787496	16184855	16589519	16993190	17399017	17810181	18238958	18688036	19149864	19637087	20167069	20729388	21296705	21868298	22449438
Gibraltar	GIB	Population, total	SP.POP.TOTL	21839	21872	22197	22753	23315	23878	24444	25015	25578	26120	26634	27020	27290	27537	27755	27951	28134	28300	28446	28575	28675	28740	28765	28733	28643	28512	28328	28096	27839	27544	27200	26898	26878	27070	27239	27377	27487	27582	27650	27692	27709	27657	27831	28274	28715	29163
Guinea	GIN	Population, total	SP.POP.TOTL	3556749	3619551	3684273	3750954	3819722	3890716	3964155	4040153	4118550	4198300	4277535	4355200	4431292	4506324	4580510	4653876	4727022	4801128	4877854	4959283	5047419	5143288	5247672	5359814	5480096	5610373	5750668	5900198	6056574	6215811	6434374	6697166	6914366	7128177	7345107	7553249	7770035	7931370	8081990	8265123	8428832	8539960	8674066	8870781	9062726	9245844
Gambia, The	GMB	Population, total	SP.POP.TOTL	398060	408930	420163	431757	443687	455952	468516	481588	495269	509440	524105	539388	555370	571991	589085	606821	625667	645770	667103	689781	713913	739125	765753	794525	825631	858874	894019	931091	970160	1011357	1054696	1099959	1145582	1188365	1227226	1264313	1301410	1338889	1376987	1415779	1455084	1495011	1535691	1577611	1621312	1667037
Guinea-Bissau	GNB	Population, total	SP.POP.TOTL	577633	582532	589474	594418	588543	575005	566908	569011	578170	581610	584403	586221	586620	592808	613338	650966	694191	741789	791694	819867	829303	842432	855891	869592	883519	897697	912126	926862	942061	957789	973669	994639	1024356	1058745	1092031	1119949	1143535	1165545	1187473	1210206	1234741	1261273	1289307	1318806	1349563	1381585
Equatorial Guinea	GNQ	Population, total	SP.POP.TOTL	269807	274896	280286	285965	291942	298238	304859	311805	318849	322517	320803	315940	309468	302281	294953	287901	281031	276779	276531	279846	288644	303252	322216	343421	364899	385547	404728	422522	439651	456808	474274	492217	510770	530023	550138	571264	593492	616893	641474	667214	703279	749836	797957	847862	899917	947367
Greece	GRC	Population, total	SP.POP.TOTL	8331725	8398050	8448233	8479625	8510429	8550333	8613651	8684088	8740765	8772764	8792806	8831036	8888628	8929086	8962022	9046541	9188150	9308479	9429959	9548258	9642505	9729350	9789513	9846627	9895801	9934300	9967213	10000595	10036983	10089498	10196792	10319927	10399061	10460415	10512922	10562153	10608800	10661259	10720509	10761698	10805808	10862132	10902022	10928070	10955141	10987314
Grenada	GRD	Population, total	SP.POP.TOTL	94058	95335	96375	97195	97760	98067	98121	98066	98078	98204	98414	98648	98777	98709	98486	98126	97632	97017	96305	95490	94538	94052	94383	94948	95498	96111	96790	97526	98308	99121	99957	100793	101602	102382	103138	103869	104584	105293	106009	106727	107451	107987	108404	108884	109323	109734
Greenland	GRL	Population, total	SP.POP.TOTL	32500	33700	35000	36400	37600	39200	40500	41900	43400	44900	46400	47200	48300	49000	49500	49600	49700	49400	49200	49600	50200	51000	51500	52100	52700	53200	53500	54100	54800	55300	55600	55500	55300	55200	55500	55800	55900	56000	56100	56100	56185	56379	56595	56751	56898	56935
Guatemala	GTM	Population, total	SP.POP.TOTL	4063655	4186201	4312044	4440264	4571109	4704965	4840958	4978862	5118111	5257081	5396966	5538355	5682833	5831631	5981197	6128731	6262404	6401515	6561534	6727797	6900212	7075648	7240241	7419642	7630682	7849693	8070818	8296485	8532099	8775546	9024773	9272584	9522266	9779761	10043718	10312996	10583526	10857754	11139145	11422965	11697592	11969422	12246915	12525842	12807402	13087629
Guam	GUM	Population, total	SP.POP.TOTL	69525	71311	73192	75095	77008	78932	80844	82719	84563	86404	88365	90466	92619	94781	96939	99057	101166	103298	105424	107636	110141	112902	115711	118508	121302	124117	126965	129858	132799	135799	138610	141073	143393	145654	147868	150054	152169	154215	156237	158289	160065	161329	162315	163137	163810	164365
Guyana	GUY	Population, total	SP.POP.TOTL	569143	582568	595461	608537	621764	635128	648646	662311	676160	690223	702705	712662	721617	730138	738057	745393	752253	758654	764586	770062	774367	776453	776712	775891	774111	771477	768098	764120	759663	754865	749894	747861	749911	752965	755822	758388	760526	762245	763586	764483	764832	764477	763652	763101	762418	760914
High income	HIC	Population, total	SP.POP.TOTL	908257300	919449343	930832910	942141564	953477851	964459737	974216640	983598764	992893702	1002359669	1011801481	1022885127	1032671994	1042151537	1051440406	1060472674	1069129380	1077728159	1086358633	1095282220	1104005914	1112639701	1120660141	1128262810	1135690050	1143179465	1150810379	1158607400	1166527684	1174766407	1182189938	1190620652	1199265190	1207321942	1214865411	1222056186	1229173348	1236130405	1242897726	1249367360	1255696330	1262093741	1268559564	1275200577	1282168195	1289125857
Hong Kong SAR, China	HKG	Population, total	SP.POP.TOTL	3094840	3168100	3305200	3420900	3504600	3597900	3629900	3722800	3802700	3863900	3959000	4045300	4123600	4241600	4377800	4461600	4518000	4583700	4667500	4929700	5063100	5183400	5264500	5345100	5397900	5456200	5524600	5580500	5627600	5686200	5704500	5752000	5800500	5901000	6035400	6156100	6435500	6489300	6543700	6606500	6665000	6714300	6744100	6730800	6783500	6813200
Honduras	HND	Population, total	SP.POP.TOTL	2062060	2121242	2182064	2244878	2309855	2377157	2446751	2518648	2593057	2670289	2750715	2834616	2922064	3011459	3099836	3193234	3294457	3398655	3505463	3614981	3727173	3841778	3958728	4078174	4199850	4323342	4448899	4576910	4707677	4841838	4980488	5123792	5271431	5423249	5579242	5739637	5903954	6071454	6234431	6400463	6577773	6757993	6938859	7119213	7298994	7478355
Heavily indebted poor countries (HIPC)	HPC	Population, total	SP.POP.TOTL	163650527	167634887	171771666	176063263	180537667	185208644	190048827	195111370	200419142	205895893	211549510	217344674	223189830	229341403	235791936	242344150	249034009	255707170	262985512	270569759	277128014	283255371	290471550	298600262	306943902	315429759	324025001	333016950	342381086	352065913	361657937	371411648	382507617	394851493	406935718	418830100	431006940	443196153	455939263	469076891	481984327	495197350	509679981	524773987	539803501	555358929
Croatia	HRV	Population, total	SP.POP.TOTL	4140181	4167292	4196712	4225675	4252876	4280923	4310701	4338683	4365628	4391490	4412252	4431275	4450564	4470161	4490660	4512082	4535934	4559571	4581085	4594778	4599782	4611509	4634234	4658254	4680285	4701417	4721446	4739745	4755207	4767260	4777368	4689022	4575818	4600463	4652024	4620030	4557097	4534920	4532135	4512597	4468302	4299642	4302174	4303399	4304600	4310145
Haiti	HTI	Population, total	SP.POP.TOTL	3858443	3929030	4001575	4073068	4146244	4223820	4302639	4382999	4465328	4549334	4635124	4723244	4813868	4906743	5001796	5099086	5198357	5299476	5402580	5507590	5614493	5723725	5835937	5951096	6069230	6190862	6316122	6445123	6578145	6714730	6854441	6995450	7136571	7278181	7419771	7562546	7707557	7854298	8002143	8151296	8303151	8455918	8607641	8759912	8910263	9061273
Hungary	HUN	Population, total	SP.POP.TOTL	9983512	10027958	10060825	10087947	10119835	10147935	10178653	10216604	10255815	10298723	10337910	10367537	10398489	10432055	10478720	10540525	10598677	10648031	10684822	10704152	10711122	10711848	10705535	10689463	10668095	10648713	10630564	10612741	10596487	10481719	10373988	10373400	10369341	10357523	10343355	10328965	10311238	10290486	10266570	10237530	10210971	10187576	10158608	10129552	10107146	10087065
IBRD only	IBD	Population, total	SP.POP.TOTL	1893704624	1915613080	1950274734	1996753344	2043309631	2090209567	2139608511	2188950141	2239610101	2292098651	2346056161	2401008150	2454764228	2508370507	2561343989	2613194091	2664387118	2714845767	2765565797	2816995104	2869277824	2923255528	2980033813	3037252917	3094477559	3152581662	3212177926	3273388723	3334875641	3395765359	3455533853	3513390696	3568890021	3622924380	3675872938	3728290191	3780446473	3832391543	3884078902	3934521819	3983328255	4031080605	4077229003	4122775918	4168676771	4214082145
IDA & IBRD total	IBT	Population, total	SP.POP.TOTL	2289192009	2321079191	2366117598	2423348992	2481068241	2539564344	2600930009	2662674586	2726203260	2791883177	2859123476	2926951963	2994028911	3062266606	3130418531	3197494325	3264075702	3330218383	3397524507	3466649271	3536954994	3609089669	3685043956	3762109361	3839296592	3918002286	3998725110	4081589183	4165012459	4248240134	4330689753	4411587746	4491324220	4570777029	4649243135	4727566480	4806199043	4884731621	4963254080	5040645749	5116723507	5192348770	5267145775	5341840046	5417128229	5492481030
IDA total	IDA	Population, total	SP.POP.TOTL	395487385	405466111	415842864	426595648	437758610	449354777	461321498	473724445	486593159	499784526	513067315	525943813	539264683	553896099	569074542	584300234	599688584	615372616	631958710	649654167	667677170	685834141	705010143	724856444	744819033	765420624	786547184	808200460	830136818	852474775	875155900	898197050	922434199	947852649	973370197	999276289	1025752570	1052340078	1079175178	1106123930	1133395252	1161268165	1189916772	1219064128	1248451458	1278398885
IDA blend	IDB	Population, total	SP.POP.TOTL	124475467	127688784	131049320	134563454	138208407	141992226	145904459	149923848	154080039	158393968	162852517	167356115	172011394	176954946	182138604	187586058	193252681	199165729	205318127	211887858	219552133	227625217	235282858	242589635	249868265	257661913	265801351	274161638	282708012	291381564	300366368	309491517	318337815	327140314	336096421	345327214	354861820	364489851	374262946	384018319	394129957	404662385	414935066	425311302	436147454	447132945
Indonesia	IDN	Population, total	SP.POP.TOTL	88296070	90791249	93375850	96051424	98833749	101365130	103792754	106526393	109450006	112517639	115657495	118833702	122039841	125288515	128555045	131843848	135173655	138533541	141953163	145434834	148950540	152485035	156052152	159651381	163251124	166776185	170175065	173511154	176855065	180201630	183501098	186778238	190043744	193305168	196591828	199888057	203204348	206536095	209826788	213004668	216077790	219097902	222088495	225048008	227926649	230871650
IDA only	IDX	Population, total	SP.POP.TOTL	271011918	277777327	284793544	292032194	299550203	307362551	315417039	323800597	332513120	341390558	350214798	358587698	367253289	376941153	386935938	396714176	406435903	416206887	426640583	437766309	448125037	458208924	469727285	482266809	494950768	507758711	520745833	534038822	547428806	561093211	574789532	588705533	604096384	620712335	637273776	653949075	670890750	687850227	704912232	722105611	739265295	756605780	774981706	793752826	812304004	831265940
Isle of Man	IMN	Population, total	SP.POP.TOTL	48868	48451	48688	49151	49625	50090	50749	51741	52891	54074	55300	56427	57367	58256	59139	59959	60750	61566	62398	63239	64076	64596	64686	64630	64528	64401	64695	65597	66680	67790	68916	69808	70353	70772	71168	71513	72047	72909	73861	74790	75659	76476	77275	78049	78792	79516
India	IND	Population, total	SP.POP.TOTL	435990338	446564729	457283090	468138575	479229598	490140146	500740247	511606372	522716889	533880544	545864268	558096387	570482142	583465598	597041391	611309535	625861883	640801103	655728229	671155747	687354025	703696250	720313473	737372681	754875449	772647793	790689978	808931270	827342990	846039529	864972221	883927600	902957070	922118387	941163767	960301044	979678458	999133762	1018665080	1038225823	1057922733	1077898575	1097600380	1116803006	1135991513	1154676322
Not classified	INX	Population, total	SP.POP.TOTL
Ireland	IRL	Population, total	SP.POP.TOTL	2828600	2824400	2836050	2852650	2866550	2877300	2888800	2902450	2915550	2932650	2957250	2992050	3036850	3085950	3137500	3189550	3238050	3282200	3329100	3373750	3412800	3453000	3485800	3510600	3532423	3538082	3539690	3540057	3524949	3511009	3513974	3534235	3558430	3576261	3590386	3608841	3637510	3674171	3712696	3754786	3805174	3866243	3931947	3996521	4070262	4159914
Iran, Islamic Rep.	IRN	Population, total	SP.POP.TOTL	21470434	22125726	22807907	23519005	24262859	25036978	25829270	26628432	27437391	28273482	29145100	30029071	30921179	31839838	32796463	33802973	34837271	35933181	37126535	38424952	39842324	41989312	44272141	46029535	47793998	49582289	51446045	53323493	55072694	56704914	58380092	59986931	61184983	61403543	61520598	62205567	62881300	63639638	64519859	65445391	66418659	67452005	68011317	68769340	70256316	71828455
Iraq	IRQ	Population, total	SP.POP.TOTL	7022052	7194553	7413875	7667928	7929566	8202140	8485104	8778869	9085016	9403356	9735611	10077809	10430164	10795869	11167761	11543639	11927651	12331046	12753355	13170365	13591992	14006381	14406083	14840555	15310733	15683430	16074145	16521049	16908819	17364542	17581206	17767253	18300845	19201195	20139807	20825860	21501321	22176593	22884399	23636527	24424056	25197840	26006559	26802659	27577878	28407448
Iceland	ISL	Population, total	SP.POP.TOTL	175574	179029	182378	185653	188983	192286	195570	198751	201488	203369	204438	206098	209137	212317	215209	217979	220154	221799	223537	225735	228138	230755	233860	236977	239511	241405	243180	245859	249740	252852	254826	257797	261057	263725	266021	267468	268916	271128	274047	277381	281205	284968	287523	289521	292074	296734
Israel	ISR	Population, total	SP.POP.TOTL	2114020	2185000	2293000	2379000	2475000	2563000	2629000	2745000	2803000	2877000	2974000	3069000	3148000	3278000	3377000	3455000	3533000	3613000	3690000	3786000	3878000	3956000	4031000	4105000	4159000	4233000	4299000	4369000	4442000	4518000	4660000	4949000	5123000	5261000	5399000	5545000	5692000	5836000	5971000	6125000	6289000	6439000	6570000	6689700	6809000	6930100
Italy	ITA	Population, total	SP.POP.TOTL	50199700	50536350	50879450	51252000	51675350	52112350	52519000	52900500	53235750	53537950	53821850	54073490	54381345	54751406	55110868	55441001	55718260	55955411	56155143	56317749	56433883	56501675	56543548	56564074	56576718	56593071	56596155	56601931	56629288	56671781	56719240	56758521	56797087	56831821	56843400	56844303	56860281	56890372	56906744	56916317	56942108	56976981	57089824	57399184	57828179	58166682
Jamaica	JAM	Population, total	SP.POP.TOTL	1650005	1673261	1696932	1721099	1745568	1769192	1791475	1812865	1833765	1855127	1878196	1903728	1931542	1961219	1990906	2018981	2045578	2070657	2094836	2119486	2145658	2173818	2203889	2234832	2264562	2290656	2312125	2329813	2345777	2361916	2379877	2400869	2424701	2449916	2475220	2500151	2524463	2547848	2569736	2589795	2607826	2624403	2640572	2656623	2672225	2687066
Jordan	JOR	Population, total	SP.POP.TOTL	853471	897591	940554	984714	1035640	1099440	1178360	1271183	1372460	1473100	1565163	1645145	1714555	1778094	1839182	1899055	1958177	2019002	2083595	2153882	2234186	2325517	2426927	2537307	2654688	2778810	2909887	3047634	3193039	3349627	3621908	3915149	4127693	4348020	4561406	4752096	4912516	5046285	5164284	5276444	5386945	5498894	5616066	5741828	5882061	6029587
Japan	JPN	Population, total	SP.POP.TOTL	93216000	94055000	94933000	95900000	96903000	97952000	98851000	99879000	101011000	102219000	103403000	105697000	107188000	108707000	110162000	111573000	112775000	113872000	114913000	115890000	116807000	117661000	118480000	119307000	120083000	120837000	121482000	122069000	122578000	123069000	123478000	123964000	124425000	124829000	125178000	125472000	125757000	126057000	126400000	126631000	126843000	127149000	127445000	127718000	127761000	127773000
Kazakhstan	KAZ	Population, total	SP.POP.TOTL	9429981	9742085	10058928	10377466	10690309	10993183	11288989	11584428	11879182	12156212	12419057	12684813	12951798	13208121	13454570	13700843	13998738	14353265	14711497	14978696	15152949	15323082	15492595	15665551	15844621	16031090	16262702	16527715	16781168	16997013	17154054	17278600	17332625	17274487	17043771	16730536	16416027	16043251	15647785	15455874	15501103	15575550	15656677	15747380	15850159	15968117
Kenya	KEN	Population, total	SP.POP.TOTL	7695307	7987770	8299308	8627971	8973535	9338078	9717816	10111057	10518823	10939695	11368791	11788904	12206060	12634835	13070078	13511671	13957623	14428819	14934126	15460666	16018459	16601507	17206175	17846374	18514906	19201768	19901646	20616096	21356219	22118434	22892651	23646514	24382460	25117188	25857130	26601751	27344211	28101768	28888057	29733408	30642890	31619170	32629808	33652223	34713455	35796484
Kyrgyz Republic	KGZ	Population, total	SP.POP.TOTL	2172300	2255900	2333400	2413700	2495300	2573300	2655300	2736500	2818300	2894800	2959900	3022300	3088200	3153800	3223900	3292400	3358700	3423900	3487100	3552000	3617400	3685800	3759300	3838300	3916400	3990300	4066500	4144600	4218400	4307500	4391236	4463634	4515400	4516777	4515069	4560454	4628438	4696421	4769015	4840422	4898362	4945073	4990704	5043308	5104713	5162640
Cambodia	KHM	Population, total	SP.POP.TOTL	5449966	5571168	5697558	5823010	5946178	6072289	6201232	6332944	6467324	6604725	6639182	6620880	6673886	6739726	6783240	6581371	6134991	5668551	5211653	5088808	5199872	5284495	5436432	5636203	5845117	6043783	6285693	6557970	6812014	7073473	7374752	7686850	8113083	8616381	9239162	10018497	10801270	11570982	12058173	12265731	12462336	12658484	12855241	13050968	13244731	13439202
Kiribati	KIR	Population, total	SP.POP.TOTL	47157	48323	49538	50791	52088	53439	54425	54996	55529	56360	57510	58652	59778	60824	61219	60987	60661	60267	59864	60172	61148	62121	63134	64169	65228	66496	68059	69733	71427	73147	74855	76367	77641	78841	80021	81234	82623	84147	85657	87126	88613	90335	92264	94175	96085	98035
St. Kitts and Nevis	KNA	Population, total	SP.POP.TOTL	55810	55334	54461	53441	52326	51139	49898	48605	47245	45731	44606	44206	44033	43880	43738	43606	43482	43358	43217	43033	42850	42698	42532	42334	42113	41874	41618	41348	41062	40758	40432	40358	40715	41242	41776	42326	42877	43428	43998	44601	45248	45761	46020	46176	46315	46437
Korea, Rep.	KOR	Population, total	SP.POP.TOTL	25012374	25765673	26513030	27261747	27984155	28704674	29435571	30130983	30838302	31544266	32240827	32882704	33505406	34103149	34692266	35280725	35848523	36411795	36969185	37534236	38123775	38723248	39326352	39910403	40405956	40805744	41213674	41621690	42031247	42449038	42869283	43295704	43747962	44194628	44641540	45092991	45524681	45953580	46286503	46616677	47008111	47370164	47644736	47892330	48082519	48184561
Kuwait	KWT	Population, total	SP.POP.TOTL	311060	345945	384995	427694	473115	521174	572590	628089	687716	749452	809114	865076	920352	977654	1038346	1104863	1178711	1258023	1340319	1423514	1504782	1583426	1662480	1744295	1820688	1894242	1972520	2052994	2134707	2217468	1684819	1351399	1634961	1672151	1664361	1681513	1730246	1787683	1844302	1900030	1954709	2008121	2059974	2109881	2157320	2236788
Latin America & Caribbean (excluding high income)	LAC	Population, total	SP.POP.TOTL	192855898	198298501	203914785	209675273	215558178	221535468	227585310	233696754	239864448	246093261	252358538	258688096	265122103	271649494	278251796	284908402	291624269	298457236	305428657	312477579	319588567	326710408	333866128	341148229	348504110	355849792	363159117	370452304	377766659	385080987	392413347	399683088	406898894	414075451	421179547	428268339	435299542	442282724	449283157	456223550	462953688	469463143	475799008	481977727	488032486	494006571
Lao PDR	LAO	Population, total	SP.POP.TOTL	2121514	2169796	2219910	2271061	2322826	2376200	2431084	2487715	2546377	2606959	2669702	2734628	2801660	2870573	2939761	3005521	3064876	3118923	3171740	3228202	3292573	3366631	3450026	3541001	3637843	3739985	3846715	3957612	4072601	4190974	4311955	4435118	4559646	4685060	4809220	4929409	5045678	5152011	5248266	5340784	5431212	5521482	5610889	5697945	5781626	5869523
Lebanon	LBN	Population, total	SP.POP.TOTL	1794406	1850084	1909578	1970316	2030543	2088831	2148260	2206731	2266368	2328159	2386114	2446314	2509729	2572935	2635185	2693191	2726469	2762155	2822682	2882635	2944763	3008981	3054931	3094996	3152744	3217376	3300365	3385555	3454649	3525285	3595175	3668912	3747371	3820647	3889799	3960735	4034781	4108405	4181281	4255277	4329340	4401918	4463504	4525508	4599279	4671102
Liberia	LBR	Population, total	SP.POP.TOTL	1139522	1167717	1197039	1227414	1258745	1291156	1324383	1358435	1393530	1429605	1466676	1504077	1542670	1583588	1626362	1670913	1717060	1766019	1818247	1872713	1929253	1986867	2045073	2107113	2173312	2240539	2308511	2377229	2446941	2517858	2223667	1956518	2072461	2155126	2149928	2169162	2232289	2412989	2670124	2821684	2928117	3015338	3094782	3119532	3156892	3301015
Libya	LBY	Population, total	SP.POP.TOTL	1492890	1555699	1621960	1690457	1753691	1804015	1849063	1898199	1952781	2014293	2082589	2153534	2226091	2314193	2432211	2571556	2721237	2881533	3052526	3233846	3424378	3621486	3724765	3718961	3773633	3898745	4017403	4129739	4237755	4342920	4445239	4544400	4640352	4733045	4822037	4906843	4987393	5064639	5140704	5218038	5305021	5403639	5508410	5619398	5736693	5858798
St. Lucia	LCA	Population, total	SP.POP.TOTL	92585	93490	94505	95519	96505	97493	98463	99504	100675	101879	103165	104564	106002	107498	109076	110725	112425	114135	115834	117528	119290	121166	123087	125044	127067	129159	131239	133227	135000	136512	137857	139520	141617	143726	145890	148208	150436	152569	154677	156702	158616	160237	161641	162976	164239	165450
Latin America & Caribbean	LCN	Population, total	SP.POP.TOTL	218624695	224737321	231038261	237499676	244080552	250750949	257488362	264279682	271127278	278039112	284995920	292033454	299187510	306451409	313798324	321203546	328673285	336262441	344000129	351820083	359713036	367619244	375568417	383657148	391832861	400012327	408172564	416332693	424525590	432726590	440958144	449128999	457245250	465325731	473328616	481309028	489235073	497097004	504952583	512730984	520272118	527572583	534691591	541643365	548455563	555120780
Least developed countries: UN classification	LDC	Population, total	SP.POP.TOTL	245048596	250984924	257173413	263557766	270194662	277101968	284221585	291642814	299374569	307260565	315102512	322517398	330244369	339000836	348044659	356845675	365558134	374293198	383667234	393715341	403007563	412046787	422560922	434142125	445947594	457866946	469843634	482075790	494400159	506991476	519693837	532595517	546905231	562489881	578028937	593609643	609407699	625267815	641401023	657616923	673630102	689878805	707266809	725111768	742717957	760741611
Low income	LIC	Population, total	SP.POP.TOTL	114749038	117449222	120247507	123153845	126203534	129388226	132707292	136209201	139862334	143593621	147417297	151313255	155206976	159304515	163605392	167964187	172393281	176957140	182134871	187656318	192424417	196030673	200239487	205645993	211255335	216877271	222444478	228079094	233656588	239520711	245338485	250935723	257817106	265888248	273508544	281169146	289332496	297416997	305718387	314325970	322668237	331269527	341035328	351244442	361305645	371788197
Liechtenstein	LIE	Population, total	SP.POP.TOTL	16451	16877	17443	18093	18755	19195	19610	20175	20835	21084	21140	21600	22132	22785	23451	23846	24058	24442	25028	25575	25512	25673	26255	26446	26596	26878	27238	27557	27948	28317	28742	29209	29627	30089	30470	30776	31033	31232	31668	32221	32645	33194	33694	34079	34447	34753
Sri Lanka	LKA	Population, total	SP.POP.TOTL	9661389	9899372	10143754	10395040	10653397	10916965	11183928	11457328	11736088	12013858	12287110	12551910	12809205	13060916	13305693	13548984	13796770	14049371	14310128	14579614	14847974	15099414	15286567	15388794	15441860	15544154	15731256	15916576	16078621	16248557	16352458	16475354	16739284	17025918	17275773	17564068	17905018	18248200	18596003	18944731	19293054	19600362	19805752	19951521	20087605	20216524
Lower middle income	LMC	Population, total	SP.POP.TOTL	819316105	839921567	861015557	882650423	904811416	927102247	949379894	972239035	995662056	1019411884	1043977970	1068357281	1093403193	1120170342	1147885460	1176467266	1205621573	1235700491	1266293483	1298149128	1332297507	1367489973	1403093561	1439288342	1476095233	1513694513	1551923872	1590598381	1629655073	1669138722	1711634869	1752379727	1792821112	1833665328	1874637283	1915943684	1957535877	1999429097	2041752501	2083995762	2126559759	2169474338	2211549617	2253206148	2295275996	2336911352
Low & middle income	LMY	Population, total	SP.POP.TOTL	2083718515	2112956756	2155317281	2209805827	2264731089	2320529383	2379893006	2439437803	2500774399	2564343032	2629570646	2695387305	2760300540	2826286599	2892061210	2956658953	3020488457	3084056561	3148921134	3215700977	3283910246	3353295180	3426055936	3500358704	3574605687	3650257753	3727939991	3807567876	3887617477	3967659848	4049620054	4127853483	4205224081	4282493268	4358651071	4434718175	4511311531	4587799929	4664177477	4739595823	4814250279	4888551481	4961926647	5034824498	5108183576	5181562375
Lesotho	LSO	Population, total	SP.POP.TOTL	736500	758824	781814	805373	829437	854090	881870	913982	948105	983202	1019273	1056246	1094063	1132697	1172420	1213643	1253214	1289967	1327240	1366169	1406521	1448069	1490732	1534413	1578986	1624379	1666138	1703390	1739841	1775436	1809696	1842379	1873274	1901793	1927707	1951437	1972418	1988130	1998049	2003234	2003913	2000853	1994679	1985059	1971129	1953076
Late-demographic dividend	LTE	Population, total	SP.POP.TOTL	1094883717	1096959453	1111293141	1137056579	1162405292	1188451832	1217220438	1245130293	1273820149	1304068257	1334963829	1366487769	1396407513	1425381475	1452919554	1478265786	1502269051	1524947137	1547677040	1570272872	1592439385	1615106897	1639793804	1664394629	1688121991	1712585483	1738504785	1765799733	1793220326	1819952808	1844718134	1868272190	1890820460	1912010271	1932650915	1952702058	1972254664	1991505992	2010169496	2027628907	2043581322	2058600486	2072599555	2086139068	2099412663	2112603351
Lithuania	LTU	Population, total	SP.POP.TOTL	2778550	2823550	2863350	2898950	2935200	2971450	3008050	3044400	3078850	3107321	3139689	3179041	3213622	3244438	3273894	3301652	3328664	3355036	3379514	3397842	3413202	3432947	3457179	3485192	3514205	3544543	3578914	3616367	3655049	3684255	3697838	3704134	3700114	3682613	3657144	3629102	3601613	3575137	3549331	3524238	3499536	3470818	3443067	3415213	3377075	3322528
Luxembourg	LUX	Population, total	SP.POP.TOTL	313970	316845	320750	324100	327750	331500	333895	334995	335850	337500	339171	342421	346600	350450	355050	358950	360731	361358	362007	362856	364150	365225	365525	365622	365998	366706	368355	370750	373450	377100	381850	387000	392175	397475	402925	408625	414225	419450	424700	430475	436300	441525	446175	451630	458095	465158
Latvia	LVA	Population, total	SP.POP.TOTL	2120979	2152681	2181586	2210919	2240623	2265919	2283217	2301220	2323619	2343173	2359164	2376389	2395674	2415819	2437186	2456130	2470989	2485073	2497921	2505953	2511701	2519421	2531080	2546011	2562047	2578873	2599892	2626583	2653434	2666955	2663151	2650581	2614338	2563290	2520742	2485056	2457222	2432851	2410019	2390482	2367550	2337170	2310173	2287955	2263122	2238799
Macao SAR, China	MAC	Population, total	SP.POP.TOTL	173315	173323	177810	182135	225655	265631	262942	260423	257933	255306	257396	247400	245050	242800	240550	238200	235600	232950	232400	235200	239650	244800	254650	269300	282850	289700	296050	306850	316000	325100	334950	351650	370900	384000	396800	409300	415100	417300	422300	427400	430600	433900	438400	443600	454700	473500
St. Martin (French part)	MAF	Population, total	SP.POP.TOTL	4250	4386	4527	4673	4827	4996	5213	5472	5693	5868	6047	6228	6409	6596	6801	7038	7303	7569	7822	8063	8288	8498	9494	11485	13733	16095	18558	21108	23749	26453	28224	28800	29081	29282	29413	29470	29443	29323	29107	29284	29996	30803	31604	32395	33171	33928
Morocco	MAR	Population, total	SP.POP.TOTL	11624933	11931085	12253092	12577502	12898886	13239171	13597065	13968175	14347899	14734255	15129449	15527225	15924692	16326269	16733842	17150786	17574182	18014756	18477385	18955589	19459943	19985401	20520318	21060696	21593778	22113953	22600803	23054392	23500524	23939414	24375551	24799014	25212468	25614586	26000822	26399429	26808107	27213337	27621648	28027179	28423435	28814643	29198142	29571415	29953018	30358144
Monaco	MCO	Population, total	SP.POP.TOTL	21808	21901	22078	22385	22686	22941	23131	23230	23437	23831	24229	24576	24862	25072	25235	25500	25895	26273	26605	26892	27122	27293	27561	27960	28356	28731	29093	29446	29781	30084	30358	30625	30887	31136	31375	31609	31837	32063	32267	32410	32455	32447	32422	32374	32307	32210
Moldova	MDA	Population, total	SP.POP.TOTL	2058020	2103327	2147227	2188895	2228000	2265287	2301871	2337695	2373073	2408469	2437590	2460611	2484742	2510584	2538164	2566998	2596491	2626298	2656211	2683035	2708675	2735987	2763101	2791207	2820518	2850787	2883057	2916306	2948891	2970039	2977912	2981566	2980965	2975966	2966745	2953200	2947293	2936413	2935227	2930622	2924668	2918135	2911385	2903198	2896023	2888985
Madagascar	MDG	Population, total	SP.POP.TOTL	5111029	5246158	5384150	5525185	5669863	5819116	5974279	6136486	6306493	6484716	6672003	6868868	7074398	7288048	7509726	7739336	7976831	8222240	8475864	8737581	9006032	9279011	9557671	9843044	10134550	10433142	10736857	11047291	11369462	11704998	12055639	12421412	12800870	13197345	13613850	14051275	14510711	14990814	15489364	16000506	16516338	17032939	17549913	18071854	18606608	19159707
Maldives	MDV	Population, total	SP.POP.TOTL	91189	93450	95802	98222	100662	104102	108507	112528	116075	119564	123219	127035	130968	134952	138978	143158	147525	151930	156159	160360	164835	169532	174333	179128	184198	190169	196935	203944	210885	217738	224762	231802	238543	244884	250822	256649	262347	267707	272723	277412	282019	286767	291616	296491	301413	306429
Middle East, North Africa, Afghanistan & Pakistan	MEA	Population, total	SP.POP.TOTL	157933392	162068656	166390935	170881281	175548682	180361095	185366083	190664582	196098319	201742643	207569650	213438350	219448355	225808044	232392106	239405806	246821883	254463059	262393904	270666000	279347788	288391729	297671219	307301861	317366458	327681501	338209596	348933449	359728415	370724431	383279026	394251647	405847278	417150344	428117445	438968860	449859387	460864078	472047033	483430509	494850317	506478256	518193093	530338988	543086512	556210211
Mexico	MEX	Population, total	SP.POP.TOTL	36724615	37890118	39129200	40424065	41772049	43174477	44629106	46129608	47668303	49233194	50814953	52412558	54030168	55667284	57320149	58982400	60645512	62308493	63979046	65648865	67300334	68892108	70433260	71971240	73506846	75043414	76585637	78136651	79695531	81247182	82820170	84430572	86044809	87653807	89259205	90862455	92452702	94021207	95575245	97115707	98625552	100099099	101548624	102978515	104394131	105811504
Marshall Islands	MHL	Population, total	SP.POP.TOTL	14703	15219	15755	16302	16852	17402	17927	18655	19862	21305	22530	23366	23992	24581	25296	26154	27021	27906	28809	29738	30774	32017	33397	34811	36264	37761	39286	40828	42321	43586	44629	45568	46388	47093	47712	48266	48775	49259	49717	50202	50706	51123	51425	51639	51791	51906
Middle income	MIC	Population, total	SP.POP.TOTL	1968969477	1995507534	2035069774	2086651982	2138527555	2191141157	2247185714	2303228602	2360912065	2420749411	2482153349	2544074050	2605093564	2666982084	2728455818	2788694766	2848095176	2907099421	2966786263	3028044659	3091485829	3157264507	3225816449	3294712711	3363350352	3433380482	3505495513	3579488782	3653960889	3728139137	3804281569	3876917760	3947406975	4016605020	4085142527	4153549029	4221979035	4290382932	4358459090	4425269853	4491582042	4557281954	4620891319	4683580056	4746877931	4809774178
North Macedonia	MKD	Population, total	SP.POP.TOTL	1435059	1455171	1471745	1488737	1510900	1533466	1557349	1582492	1608930	1636345	1664208	1691216	1717395	1743816	1770545	1797972	1825830	1853138	1879847	1906523	1933038	1959065	1978956	1991901	2003399	2014331	2024732	2035157	2045737	2055649	2063689	2055994	2032523	2006854	1992666	1998534	2012553	1996869	2007523	2017142	2026350	2034882	2020157	2022725	2016186	2005330
Mali	MLI	Population, total	SP.POP.TOTL	5402550	5482283	5563917	5646605	5730125	5815487	5902204	5990906	6082979	6177704	6276472	6377944	6483726	6597106	6715436	6837261	6960979	7090979	7229651	7375266	7530515	7692766	7860194	8034400	8208599	8374663	8531277	8681164	8833996	8999938	9178830	9362888	9553540	9754786	9967031	10185365	10407278	10646495	10919573	11227415	11559290	11912158	12288050	12684955	13102409	13538647
Malta	MLT	Population, total	SP.POP.TOTL	326550	325250	323900	322550	321250	318800	315200	311550	307900	304300	302650	302700	302450	302200	301996	304222	305774	306970	310182	313342	316645	318982	325898	330524	330593	336452	342121	344485	347325	350722	354170	363845	367618	371308	374797	377419	379905	382791	385287	387578	390087	393028	395969	398582	401268	403834
Myanmar	MMR	Population, total	SP.POP.TOTL	21730250	22210581	22704719	23213408	23737315	24279431	24836496	25406429	25989662	26585112	27193016	27807219	28428324	29026388	29598167	30176565	30758811	31355966	31972976	32596550	33227204	33858783	34482965	35162715	35899313	36622827	37314878	37971594	38600927	39214618	39817251	40394154	40950342	41502429	42055143	42605338	43154860	43708798	44257793	44787724	45290841	45771139	46232653	46667192	47068772	47438365
Middle East, North Africa, Afghanistan & Pakistan (excluding high income)	MNA	Population, total	SP.POP.TOTL	151883053	155796245	159849264	164082777	168474397	173012080	177756891	182734055	187877692	193184368	198631041	204099318	209697605	215569107	221668657	228187384	235058983	242098387	249392069	256976193	264948525	273288518	281844787	290721921	300042126	309566339	319257806	329101677	339013669	349120795	361322200	371610655	381995940	392371485	402475400	412447289	422368926	432334916	442475967	452793419	462980522	473223662	483540516	494288606	505618583	517240777
Montenegro	MNE	Population, total	SP.POP.TOTL	480579	491140	502558	513409	521753	526327	526419	522796	517481	513340	512407	515449	521785	530220	538902	546487	552562	557576	562065	566888	572608	579445	587001	594506	600884	605398	607711	608144	607413	606571	606372	607105	608516	610170	611389	611712	611003	609520	607662	606001	604950	607389	609828	612267	613353	614261
Mongolia	MNG	Population, total	SP.POP.TOTL	977595	1009284	1041444	1071362	1100234	1131177	1163754	1196996	1229930	1262284	1295272	1330071	1366821	1405502	1446050	1488296	1531945	1576245	1619468	1660659	1701335	1742857	1785364	1829092	1874349	1921514	1970965	2022800	2076322	2124185	2098710	2165342	2167790	2165130	2189395	2224945	2259507	2291750	2323809	2356813	2388299	2417751	2449027	2480374	2508412	2536407
Northern Mariana Islands	MNP	Population, total	SP.POP.TOTL	8736	8995	9280	9595	9925	10264	10612	10749	10468	9989	10170	11271	12636	13880	14655	15065	15438	15787	16130	16488	17625	19826	22350	24936	27575	30258	32980	35736	38519	41303	43342	44393	45181	45952	46730	48176	51706	56596	61337	65916	68356	67984	66778	65421	63938	62354
Mozambique	MOZ	Population, total	SP.POP.TOTL	6713695	6834936	6969364	7109828	7255061	7406421	7562990	7724550	7892613	8066951	8250506	8456317	8692935	8954242	9236093	9540817	9867209	10224975	10618250	11028809	11336221	11568127	11824370	12073822	12315954	12548949	12770578	12822574	12800558	12906842	13094537	13352090	13613316	14051192	15033853	15960530	16492480	16949982	17340464	17734506	18129653	18537729	18958338	19392475	19840313	20304569
Mauritania	MRT	Population, total	SP.POP.TOTL	824298	846167	869184	893423	918955	945838	974157	1003843	1034739	1066754	1099806	1133702	1168355	1203838	1240188	1277330	1315336	1353768	1392713	1432758	1474043	1516877	1561176	1606746	1653693	1702107	1751835	1803014	1855859	1903048	1951878	2009738	2088135	2174328	2249454	2312017	2358188	2411306	2474651	2541698	2613441	2678760	2738655	2802046	2868664	2939059
Mauritius	MUS	Population, total	SP.POP.TOTL	680331	680757	700349	718861	736381	753000	768813	783917	798413	812405	826000	839230	852053	864819	878042	892000	906507	921379	933499	949888	966039	980462	992521	1001691	1012221	1020528	1028360	1036082	1043239	1051260	1058775	1070266	1084441	1097374	1112846	1122457	1133996	1148284	1160421	1175267	1186873	1196287	1204621	1213370	1221003	1228254
Malawi	MWI	Population, total	SP.POP.TOTL	3628134	3715534	3806307	3900506	3997305	4096157	4197926	4303012	4411054	4521184	4633944	4751434	4874475	5003938	5141337	5287367	5443384	5614983	5810132	6028749	6265529	6516454	6778879	7051709	7332810	7620508	7906480	8293174	8753262	9176220	9545852	9844227	10135079	10284024	10164894	10150117	10352228	10562035	10792876	11047804	11315942	11593058	11880440	12181574	12500737	12840031
Malaysia	MYS	Population, total	SP.POP.TOTL	7956197	8164443	8380172	8602160	8828406	9056408	9284688	9507099	9725281	9947597	10178802	10423453	10676835	10935621	11200906	11471914	11750097	12035713	12328157	12627862	12983363	13399203	13832798	14285907	14759009	15252258	15760419	16276737	16796605	17314997	17833171	18342464	18834572	19322664	19820446	20330599	20850087	21375218	21906713	22435531	22967816	23526538	24102477	24679602	25256772	25836071
North America	NAC	Population, total	SP.POP.TOTL	198622564	202005123	205196239	208251340	211260410	214028461	216656534	219173514	221500404	223756306	226428124	229675639	232167266	234453723	236715025	239169404	241538018	244018165	246601634	249310061	251794340	254339912	256835329	259213228	261487222	263821663	266289167	268791866	271347446	274152910	277371697	281076404	284943671	288662580	292185857	295639837	299064031	302623125	306069812	309502410	312909691	316051677	319046534	321812780	324806660	327822042
Namibia	NAM	Population, total	SP.POP.TOTL	591465	603067	615759	629589	644530	660558	677655	696045	715542	736120	757868	780584	804399	828928	854320	881032	906566	931104	947269	962825	981434	992500	1010308	1037511	1065989	1096890	1131081	1167889	1209696	1288947	1369303	1415684	1461322	1508697	1556304	1602170	1646103	1689264	1732745	1776368	1818647	1857048	1889970	1917464	1942082	1966582
New Caledonia	NCL	Population, total	SP.POP.TOTL	79819	82521	85334	88050	90602	93159	95820	98587	101441	104849	109338	114514	119931	125585	131452	137462	142091	144599	146392	148132	149817	151441	153001	155003	157583	160234	162898	165650	168502	172029	176456	181238	186072	190857	195614	200379	205034	209560	214047	218527	223098	227707	232236	236678	240852	244381
Niger	NER	Population, total	SP.POP.TOTL	3505050	3608162	3714520	3823873	3935814	4049695	4165544	4283590	4403637	4525725	4650275	4776225	4904845	5037865	5174953	5317019	5464962	5619716	5782932	5955556	6135971	6322006	6512732	6708644	6909971	7118457	7335811	7561150	7793748	8034780	8286059	8546900	8817633	9100789	9398258	9714529	10044852	10383969	10741413	11117411	11509630	11920647	12349144	12796984	13265836	13756192
Nigeria	NGA	Population, total	SP.POP.TOTL	45053782	45989310	46965292	47973575	49012016	50086764	51188234	52293065	53432783	54631914	55893838	57214684	58601748	60082139	61679144	63410815	65258009	67234590	69326532	71498242	73764641	76068103	78378701	80438260	82526443	84897973	87235953	89591716	92020090	94531014	97120925	99720162	102372770	105122069	107935714	110819428	113754779	116754792	119846254	123047320	126382494	129862595	133471989	137202644	141057045	145017253
Nicaragua	NIC	Population, total	SP.POP.TOTL	1782370	1836451	1892320	1950159	2010176	2072681	2137820	2205567	2275836	2348398	2423065	2499825	2573578	2649278	2732075	2816943	2903851	2992534	3080314	3164525	3252403	3345674	3438745	3530282	3619104	3706479	3794157	3882164	3972320	4066476	4162559	4259637	4357026	4453732	4549316	4642931	4729974	4809573	4883655	4954018	5022633	5087825	5149909	5210963	5272912	5342105
Netherlands	NLD	Population, total	SP.POP.TOTL	11486631	11638712	11805689	11965966	12127120	12294732	12456251	12598201	12729721	12877984	13038526	13194497	13328593	13439322	13545056	13666335	13774037	13856185	13941700	14038270	14149800	14247208	14312690	14367070	14424211	14491632	14572278	14665037	14760094	14848907	14951510	15069798	15184166	15290368	15382838	15459006	15530498	15610650	15707209	15812088	15925513	16046180	16148929	16225302	16281779	16319868
Norway	NOR	Population, total	SP.POP.TOTL	3581239	3609800	3638918	3666537	3694339	3723168	3753012	3784539	3816486	3847707	3875763	3903039	3933004	3960612	3985258	4007313	4026152	4043205	4058671	4072517	4085620	4099702	4114787	4128432	4140099	4152516	4167354	4186905	4209488	4226901	4241473	4261732	4286401	4311991	4336613	4359184	4381336	4405157	4431464	4461913	4490967	4513751	4538159	4564855	4591910	4623291
Nepal	NPL	Population, total	SP.POP.TOTL	10123658	10318396	10521116	10729818	10946392	11173411	11408710	11652716	11906266	12167036	12436190	12710061	12989099	13275239	13568435	13870695	14177649	14499175	14839695	15190590	15553105	15922423	16297987	16689119	17085242	17477692	17868124	18250505	18638661	19057807	19524573	20036500	20609707	21180159	21717479	22245439	22741862	23219463	23680357	24125199	24546509	24946748	25328981	25688758	26016656	26309458
Nauru	NRU	Population, total	SP.POP.TOTL	4607	4774	4979	5226	5515	5832	6043	6135	6328	6581	6710	6762	6812	6866	6923	6987	7064	7163	7298	7468	7649	7839	8040	8216	8377	8551	8742	8946	9165	9390	9622	9850	10021	10102	10137	10165	10183	10197	10198	10187	10168	10130	10082	10059	10060	10049
New Zealand	NZL	Population, total	SP.POP.TOTL	2371800	2419700	2482000	2531800	2585400	2628400	2675900	2724100	2748100	2772800	2810700	2853000	2903900	2961300	3023700	3083100	3110500	3120200	3121200	3109000	3112900	3124900	3156100	3199300	3227100	3247100	3246300	3274400	3283400	3299200	3329800	3495100	3531700	3572200	3620000	3673400	3732000	3781300	3815000	3835100	3857700	3880500	3948500	4027200	4087500	4133900
OECD members	OED	Population, total	SP.POP.TOTL	809580211	820795966	832227425	843650775	855135046	866300939	877030636	887553832	897869478	908238681	918489195	930596384	941467841	952000973	962281658	972242932	981612322	990951247	1000355869	1009880602	1019332414	1028615740	1037419356	1046094679	1054395892	1062728299	1071222636	1079813087	1088587717	1097876374	1107695519	1118410105	1129039882	1139203498	1148779736	1158068699	1167149370	1176191803	1184928348	1193682861	1202226474	1211109104	1220101353	1229012217	1237896576	1246656490
Oman	OMN	Population, total	SP.POP.TOTL	530485	539854	549941	560827	572577	585236	598804	613318	628798	645255	662680	681119	700593	721179	746988	778864	814701	855314	900304	949116	1001248	1057320	1117678	1181459	1247716	1325480	1413419	1500996	1588568	1676228	1763954	1851473	1938238	2021675	2081834	2120528	2156926	2190720	2222489	2252909	2282131	2310217	2337140	2363796	2404821	2459802
Other small states	OSS	Population, total	SP.POP.TOTL	5297024	5374964	5476102	5578740	5680872	5779625	5872358	5959394	6047701	6141108	6240826	6348289	6460753	6573195	6679456	6790788	6913443	7044675	7176063	7309677	7444817	7577614	7711694	7843045	7975015	8118973	8271747	8429468	8592255	8765561	8949306	9131087	9201490	9249106	9328189	9389918	9493131	9618823	9746302	9758520	9788238	9961679	10136134	10269557	10371059	10479844
Pakistan	PAK	Population, total	SP.POP.TOTL	45709310	46921277	48156128	49447776	50799999	52209010	53678667	55214768	56810507	58460939	60166719	61847899	63583194	65461912	67415487	69461175	71620254	73901827	76307379	78997039	82291010	85802049	89089246	92227711	95164936	98229285	101606764	105130717	108724739	112336629	116155576	120060406	123546848	127020117	130748083	134582253	138557092	142531804	146522356	150565377	154879127	159270907	163222549	167110248	171286000	175453212
Panama	PAN	Population, total	SP.POP.TOTL	1126005	1159870	1195301	1232124	1270065	1308835	1348388	1388628	1429447	1470886	1513070	1556081	1599723	1643690	1687926	1732389	1776935	1821543	1866311	1911552	1957534	2004418	2052271	2101106	2150782	2200915	2251325	2301970	2352848	2403820	2455583	2508265	2561336	2615099	2669546	2724557	2780227	2836695	2893914	2951822	3010369	3069537	3129344	3189807	3251155	3313026
Peru	PER	Population, total	SP.POP.TOTL	10174127	10475123	10784612	11102099	11427978	11761085	12101297	12448814	12803993	13166767	13501237	13838067	14210147	14582867	14956552	15333957	15716809	16109806	16516059	16933139	17360949	17798805	18246503	18705957	19174716	19648204	20117122	20582320	21054702	21532589	22014771	22483775	22946340	23413783	23881493	24348919	24811171	25274147	25738095	26186504	26598331	26964601	27288217	27580490	27852190	28101180
Philippines	PHL	Population, total	SP.POP.TOTL	27891897	28792621	29723536	30674731	31643032	32625316	33617170	34621320	35638342	36660799	37622204	38518659	39408560	40294130	41174341	42120826	43201488	44367962	45575281	46807103	48043740	49311727	50695707	52194620	53726181	55213006	56645077	58157496	59739052	61265260	62854666	64382249	65926125	67530621	69019291	70546246	72190242	73908810	75791024	77753257	79625397	81401488	83068889	84731835	86394504	88015962
Palau	PLW	Population, total	SP.POP.TOTL	9328	9555	9793	10037	10292	10547	10805	10988	11080	11159	11368	11759	12194	12552	12687	12655	12598	12525	12440	12337	12271	12402	12694	13006	13337	13688	14024	14334	14645	14945	15259	15614	15989	16372	16770	17195	17654	18108	18524	18901	19178	19352	19503	19659	19820	19819
Papua New Guinea	PNG	Population, total	SP.POP.TOTL	1995110	2046127	2093919	2141376	2188325	2235820	2285774	2337532	2390803	2446927	2505628	2566421	2628432	2690629	2752671	2814820	2877327	2940327	3003714	3067341	3131512	3197019	3264291	3333633	3405198	3478936	3554793	3632543	3711880	3796078	3896481	4021837	4166699	4320872	4480208	4644278	4813361	4987883	5166390	5349333	5537064	5728435	5924003	6123997	6328041	6535905
Poland	POL	Population, total	SP.POP.TOTL	29637450	29964000	30308500	30712000	31139450	31444950	31681000	31987155	32294655	32548300	32664300	32783500	33055650	33357200	33678899	34015199	34356300	34689050	34965600	35247217	35574150	35898587	36230481	36571808	36904134	37201885	37456119	37668045	37824487	37961529	38110782	38246193	38363667	38461408	38542652	38594998	38624370	38649660	38663481	38660271	38258629	38248076	38230364	38204570	38182222	38165445
Pre-demographic dividend	PRE	Population, total	SP.POP.TOTL	188920253	193342737	198004977	202879347	207958469	213246024	218721527	224392810	230300956	236419165	242769169	249344292	256080715	263238228	270820390	278656584	286692896	295051411	304240149	313887702	322965422	330988678	339575832	349226289	359259708	369570962	379883689	390374024	400820214	411682495	422471117	433111892	445411988	459529211	475022693	490118620	503373634	516729805	531450214	546890075	562428025	578587390	596114535	614269146	632445407	651320620
Puerto Rico (US)	PRI	Population, total	SP.POP.TOTL	2358000	2399722	2450322	2504530	2554066	2594000	2624995	2645674	2662064	2684150	2718000	2762190	2817256	2878786	2939299	2994000	3043854	3088690	3129421	3168088	3206000	3242552	3277453	3311138	3344190	3377000	3409554	3441850	3473898	3505650	3537000	3562110	3585176	3615497	3649237	3683103	3724655	3759430	3781101	3800081	3810605	3818774	3823701	3826095	3826878	3821362
Korea, Dem. People's Rep.	PRK	Population, total	SP.POP.TOTL	11722953	11990713	12262882	12567057	12889770	13219369	13569094	13958350	14365596	14767615	15172775	15572457	15975069	16350367	16673121	16971055	17243450	17492798	17735995	17983470	18236786	18501295	18776357	19054034	19335043	19620388	19910855	20205483	20503161	20804367	21112137	21428638	21750911	22073352	22393975	22669304	22895746	23110830	23311564	23497599	23665910	23815358	23943973	24090380	24254943	24396433
Portugal	PRT	Population, total	SP.POP.TOTL	8857716	8929316	8993985	9030355	9035365	8998595	8930990	8874520	8836650	8757705	8680431	8643756	8630430	8633100	8754365	9093470	9355810	9455675	9558250	9661265	9766312	9851362	9911771	9957865	9996232	10023613	10032734	10030031	10019610	10005000	9983218	9960235	9952494	9964675	9991525	10026176	10063945	10108977	10160196	10217828	10289898	10362722	10419631	10458821	10483861	10503330
Paraguay	PRY	Population, total	SP.POP.TOTL	1883514	1927394	1973130	2021909	2073119	2125177	2177584	2229994	2282391	2334992	2388028	2442537	2499881	2561102	2625621	2691648	2758836	2827874	2899269	2973968	3053235	3137604	3226189	3318068	3412936	3510671	3611474	3714889	3820546	3927802	4035747	4144364	4253600	4362696	4471417	4579806	4687543	4794412	4900025	5003135	5100868	5187689	5261328	5326436	5388175	5448097
West Bank and Gaza	PSE	Population, total	SP.POP.TOTL																															1978248	2068845	2163591	2262676	2366298	2474666	2587997	2706518	2776568	2848431	2922153	2997784	3075373	3154969	3236626	3320396
Pacific island small states	PSS	Population, total	SP.POP.TOTL	912120	938244	965430	993524	1022081	1051140	1079689	1105889	1130851	1156327	1181537	1205879	1229695	1253169	1277600	1303608	1331351	1360619	1390784	1422234	1454476	1487561	1521261	1555284	1590058	1625654	1660533	1692234	1721206	1748900	1775607	1801531	1827395	1853148	1878007	1901782	1926342	1954642	1984859	2014289	2042274	2069097	2095273	2120592	2145505	2170029
Post-demographic dividend	PST	Population, total	SP.POP.TOTL	756359099	765442136	774678780	783736508	792735136	801451274	809623605	817437528	825029113	832633761	840190480	849553629	857513072	865015884	872247955	879088327	885244462	891301791	897398355	903773491	909919829	916024683	921558505	926768139	931624894	936480384	941566838	946817118	952284317	958176572	964371624	971291914	978087877	984398082	990028770	995338472	1000836719	1006102041	1011086034	1015990094	1021150563	1026105872	1031302538	1036498631	1041890752	1047140108
French Polynesia	PYF	Population, total	SP.POP.TOTL	83671	85434	87261	89737	92823	96017	99320	102754	106353	110111	114010	117945	121886	125897	129960	134045	138114	142313	146821	151569	156471	161506	166646	171750	176469	180988	185669	190449	195193	199643	203776	207744	211559	215219	218738	222118	225489	229121	232891	236595	240337	244097	247775	251637	255654	259507
Qatar	QAT	Population, total	SP.POP.TOTL	36010	39680	44630	50380	56867	64065	72192	81439	91749	103025	116350	131346	146506	161841	177362	193087	209052	225285	241808	258670	275913	293553	311537	329709	347878	365940	382422	397005	411264	425646	440175	454853	469657	484545	499459	514325	529019	550500	580540	612500	644989	677925	711205	744682	773332	825408
Romania	ROU	Population, total	SP.POP.TOTL	18406905	18555250	18676550	18797850	18919126	19031576	19215450	19534242	19799831	20009141	20250398	20461567	20657957	20835681	21029429	21293583	21551634	21756096	21951464	22090488	22207282	22353070	22475741	22560478	22640547	22732999	22836841	22949430	23057662	23161458	23201835	23001155	22794284	22763280	22730211	22684270	22619004	22553978	22507344	22472040	22442971	22131970	21730496	21574326	21451748	21319685
Russian Federation	RUS	Population, total	SP.POP.TOTL	119897000	121236000	122591000	123960000	125345000	126745000	127468000	128196000	128928000	129664000	130404000	131155000	131909000	132669000	133432000	134200000	135147000	136100000	137060000	138027000	139010000	139941000	140823000	141668000	142745000	143858000	144894000	145908000	146857000	147721000	147969406	148394216	148538197	148458777	148407912	148375787	148160129	147915361	147670784	147214776	146596869	145976482	145306497	144648618	144067316	143518814
Rwanda	RWA	Population, total	SP.POP.TOTL	3022294	3106779	3186025	3258890	3334834	3423210	3521626	3629577	3744010	3861271	3980669	4100044	4220335	4345047	4474228	4607728	4745954	4888240	5035171	5189541	5353259	5527230	5711549	5905311	6107627	6317228	6531881	6749493	6968071	7184706	7375307	7526966	7683266	7981132	6792352	5674118	6708764	7755238	8081681	8147912	8213931	8287094	8400180	8586875	8816844	9054528
South Asia	SAS	Population, total	SP.POP.TOTL	507919318	520416897	533162544	546111213	559361410	572498343	585381018	598618725	612171905	625773349	640078209	654081362	668383197	684000704	700247383	717092514	734217635	751760482	769329109	787440583	806369775	825638560	845349352	865442337	885894499	906622025	927646189	948802143	970044151	991571016	1013297018	1035058149	1057074570	1079256381	1101305517	1123515559	1145998648	1168625898	1191405930	1214263809	1237185482	1260149056	1282584796	1304347790	1325950587	1346886384
Saudi Arabia	SAU	Population, total	SP.POP.TOTL	2435403	2526347	2620910	2719341	2821968	2928771	3039887	3157242	3282711	3417114	3562470	3724031	3905722	4106344	4323632	4556287	4807933	5083048	5381902	5703698	6047997	6420551	6824486	7252941	7697307	8151779	8628639	9130194	9629165	10128394	10640691	11160744	11686676	12215862	12750040	13289245	13831009	14374943	14922185	15472075	16177722	17041397	17910910	18786767	19669480	20559890
Sudan	SDN	Population, total	SP.POP.TOTL	8364489	8634941	8919028	9218077	9531109	9858030	10197578	10550597	10917999	11298936	11695771	12105539	12527856	13049315	13580723	14064798	14569716	15086614	15695003	16355352	17058905	17780572	18486645	19109770	19546528	19905872	20288238	20704904	21138431	21578022	22021481	22470676	22927355	23445592	24043948	24672143	25231528	25799821	26458999	27130613	27816745	28516770	29228727	29896035	30556637	31262444
Senegal	SEN	Population, total	SP.POP.TOTL	3340907	3436375	3534686	3635876	3740535	3849788	3964299	4083870	4207587	4334974	4466328	4601864	4741631	4885181	5029437	5170810	5308564	5439549	5568096	5702895	5845638	5997160	6156961	6324504	6499364	6683287	6878192	7081530	7289618	7502207	7720523	7943085	8168395	8396288	8624078	8848101	9067014	9283495	9502952	9730887	9968260	10212942	10466214	10721176	10975704	11235472
Singapore	SGP	Population, total	SP.POP.TOTL	1646400	1702400	1750200	1795000	1841600	1886900	1934400	1977600	2012000	2042500	2074507	2112900	2152400	2193000	2229800	2262600	2293300	2325300	2353600	2383500	2413945	2532835	2646466	2681061	2732221	2735957	2733373	2774789	2846108	2930901	3047132	3135083	3230698	3313471	3419048	3524506	3670704	3796038	3927213	3958723	4027887	4138012	4175950	4114826	4166664	4265762
Solomon Islands	SLB	Population, total	SP.POP.TOTL	139688	142912	146201	149589	153085	156686	160393	164245	168282	172476	176579	180637	184994	189774	195041	200744	207194	214418	222029	229953	238135	246555	255200	264068	273163	282455	291842	301414	311265	321282	331435	341738	352205	362839	373675	384733	396009	407474	419071	430500	440469	449125	457671	466154	474611	483080
Sierra Leone	SLE	Population, total	SP.POP.TOTL	2268356	2304227	2342242	2382258	2424390	2468666	2514638	2562384	2611532	2661365	2712286	2763222	2814388	2866955	2920459	2974657	3028820	3085354	3145517	3207499	3272089	3338940	3408183	3481646	3558758	3638438	3728380	3829718	3934517	4034037	4196828	4246267	4166366	4157130	4173105	4179179	4199210	4253716	4295785	4318043	4423611	4692716	4971435	5177687	5355717	5501712
El Salvador	SLV	Population, total	SP.POP.TOTL	2791459	2870016	2949204	3028679	3111883	3199466	3290961	3385184	3480773	3576485	3668796	3757523	3846830	3938068	4029671	4120449	4210310	4301256	4394114	4480388	4540382	4570599	4622477	4707367	4798003	4894706	4992769	5092441	5195833	5298979	5399726	5495077	5585609	5659957	5714129	5762131	5805286	5844578	5880781	5913900	5943366	5968060	5986631	5998599	6004671	6005578
San Marino	SMR	Population, total	SP.POP.TOTL	15428	15799	16183	16580	16977	17305	17523	17688	17861	18026	18168	18419	18787	18992	19030	19046	19110	20017	21026	21320	21585	21840	22055	22229	22346	22485	22636	22686	22843	23154	23475	23797	24125	24472	24823	25158	25482	25800	26125	26459	26799	27143	27491	27843	29457	29836
Somalia, Fed. Rep.	SOM	Population, total	SP.POP.TOTL	2876331	2952054	3030091	3110361	3192796	3277874	3365106	3454537	3546590	3641015	3738448	3837691	3939436	4045592	4151842	4257535	4365812	4484050	4814892	5449117	5936154	5982849	6003840	6198430	6428389	6693289	6974788	7228302	7235360	7114817	7082811	6813760	6495107	6681399	7026797	7285007	7554474	7824525	8155417	8492059	8838713	9198493	9550063	9909157	10280998	10644228
Serbia	SRB	Population, total	SP.POP.TOTL	6638992	6689077	6740264	6787950	6832855	6876624	6927969	6966522	7007586	7123249	7164993	7211716	7252012	7283902	7326043	7368717	7418973	7462783	7504017	7541997	7709544	7736787	7763335	7788100	7813549	7835902	7853824	7868027	7884218	7893787	7897937	7595636	7604063	7614328	7622711	7628264	7622185	7598538	7567745	7540401	7516346	7503433	7500031	7480591	7463157	7440769
Sub-Saharan Africa (excluding high income)	SSA	Population, total	SP.POP.TOTL	206288260	211292606	216517247	221937898	227579664	233447992	239526768	245829213	252384968	259166830	266188793	273440461	280872413	288750400	297083013	305701947	314545326	323710360	333680160	344394495	355467472	366437525	377641425	389094648	400538509	412354065	424407604	436643155	448764072	461052538	473635450	485834033	498349572	511789636	525116200	538769611	553009918	567371961	582361221	597802260	613632482	630019621	646942913	664400687	682493463	701214785
South Sudan	SSD	Population, total	SP.POP.TOTL	2931559	2976724	3024308	3072669	3129918	3189835	3236423	3277648	3321528	3365533	3409614	3468646	3542497	3627383	3723259	3821494	3921910	4024032	4127657	4232605	4339030	4447272	4557686	4661574	4750627	4834296	4921240	4962395	4848029	4713229	4737633	4836677	4909749	4956002	5071184	5225836	5356925	5509136	5620068	5771628	6032267	6308391	6596806	6903127	7233041	7590143
Sub-Saharan Africa	SSF	Population, total	SP.POP.TOTL	227706653	233241597	239026415	245034711	251292534	257806104	264528156	271499400	278774032	286291766	294071521	302095262	310303050	318974077	328098223	337484491	347140248	356939418	367476902	378695833	389959247	401805572	414407128	426899800	439338948	452261445	465510912	479171693	492983652	507001395	521314712	535621670	550274082	565570780	580801913	596382250	612553970	628853819	645803591	663257231	681125107	699588585	718662153	738316131	758653144	779665113
Small states	SST	Population, total	SP.POP.TOTL	8767492	8927466	9111719	9300542	9487757	9670463	9846482	10014042	10181338	10353360	10526671	10702728	10876065	11041388	11199859	11364129	11541204	11728016	11915233	12105153	12298380	12490529	12683850	12874950	13067491	13275197	13492150	13707720	13924070	14148870	14379862	14610383	14735408	14837410	14970002	15087617	15248657	15435138	15624755	15698038	15786741	16017863	16250203	16441139	16597133	16699341
Sao Tome and Principe	STP	Population, total	SP.POP.TOTL	68012	68707	69403	70112	70865	71680	72576	73596	74765	76083	77626	79330	81041	82798	84672	86708	88922	91301	93794	96252	98544	100615	102508	104380	106394	108658	111150	113919	116939	119979	122980	125697	128110	130467	132732	134895	136962	138922	140751	142442	144018	146375	149922	153814	157705	161639
Suriname	SUR	Population, total	SP.POP.TOTL	263918	272791	283912	297034	309041	320000	331135	342679	354616	366906	379442	391932	397413	395772	393676	391170	388289	385067	381502	377602	375377	375459	376555	378746	382193	386972	392330	396911	402227	408409	412493	415013	417589	419352	422375	429606	438830	448067	457406	466916	476643	486560	496551	506414	513923	519313
Slovak Republic	SVK	Population, total	SP.POP.TOTL	4068095	4191667	4238188	4282017	4327341	4370983	4411666	4449367	4483915	4518607	4538223	4557449	4596622	4641445	4689623	4739105	4789507	4840501	4890125	4938973	4979815	5016105	5055099	5091971	5127097	5161768	5193838	5222840	5250596	5275942	5299187	5303294	5305016	5325305	5346331	5361999	5373361	5383291	5390516	5396020	5388720	5378867	5376912	5373374	5372280	5372807
Slovenia	SVN	Population, total	SP.POP.TOTL	1584720	1594131	1603649	1616971	1632114	1649160	1669905	1689528	1704546	1713874	1724891	1738335	1752233	1766697	1776132	1793581	1820249	1842377	1862548	1882599	1901315	1906531	1910334	1922321	1932154	1941641	1965964	1989776	1995196	1996351	1998161	1999429	1996498	1991746	1989443	1989872	1988628	1985956	1981629	1983045	1988925	1992060	1994530	1995733	1997012	2000474
Sweden	SWE	Population, total	SP.POP.TOTL	7484656	7519998	7561588	7604328	7661354	7733853	7807797	7867931	7912273	7968072	8042801	8098334	8122300	8136312	8159955	8192437	8222286	8251540	8275599	8293678	8310531	8320503	8325263	8329033	8336605	8350386	8369829	8397804	8436489	8492964	8558835	8617375	8668067	8718561	8780745	8826939	8840998	8846062	8850974	8857874	8872109	8895960	8924958	8958229	8993531	9029572
Eswatini	SWZ	Population, total	SP.POP.TOTL	345337	353264	361365	369759	378656	388336	398766	409031	419147	429875	441216	453183	465788	479038	492988	507673	523330	540348	558446	577199	596644	616808	637652	658957	680783	706196	734732	763811	799798	837800	872428	908189	943416	971318	971212	970433	989841	1006635	1019653	1030782	1041414	1051064	1059441	1066700	1073159	1079022
Sint Maarten (Dutch part)	SXM	Population, total	SP.POP.TOTL	2715	2970	3264	3584	3922	4282	4664	5071	5500	5948	6414	6888	7380	7917	8492	9094	9716	10364	11039	11723	12410	13302	14607	16133	17694	19291	20930	22617	24357	26169	28061	30046	31567	32026	31917	31772	31598	31404	31193	30977	30773	30726	30960	31327	31690	32057
Seychelles	SYC	Population, total	SP.POP.TOTL	41700	42889	44042	45176	46322	47500	48699	49911	51134	52365	53600	54695	56029	56892	57937	59292	60504	61786	62150	62686	63261	64035	64413	64335	64717	65244	65652	68499	68755	69167	69507	70439	70763	72253	74205	75304	76417	77319	78846	80410	81131	81202	83723	82781	82475	82858
Syrian Arab Republic	SYR	Population, total	SP.POP.TOTL	4673500	4815466	4959340	5110467	5269087	5435267	5609047	5790198	5978742	6175166	6380609	6598094	6826024	7060321	7302160	7554364	7817320	8090501	8372759	8661909	8957663	9260189	9572511	9904809	10258398	10625672	11002844	11388923	11782264	12179060	12579208	12980821	13385571	13795686	14208583	14616801	15018104	15417542	15820413	16228061	16637888	17051338	17468332	17889296	18336875	18814091
Turks and Caicos Islands	TCA	Population, total	SP.POP.TOTL	5599	5622	5636	5647	5657	5658	5654	5657	5656	5652	5667	5754	5915	6090	6273	6463	6660	6864	7083	7306	7564	7908	8297	8697	9107	9521	9941	10361	10775	11193	11688	12305	12970	13648	14344	15052	15765	16482	17212	17959	18730	19576	20597	21727	22856	23988
Chad	TCD	Population, total	SP.POP.TOTL	3049838	3111947	3175598	3240905	3307479	3374220	3440903	3508512	3578231	3651113	3727828	3807316	3893252	3985909	4078356	4167234	4251297	4331667	4411366	4505384	4515453	4520959	4738483	4979130	5045145	5096269	5251069	5438309	5625602	5819586	5982833	6205676	6474656	6629146	6783450	7089064	7410108	7670366	7938840	8222705	8512093	8804124	9116192	9487833	9920036	10328092
East Asia & Pacific (IDA & IBRD countries)	TEA	Population, total	SP.POP.TOTL	884252517	883558197	895224912	918259043	940909509	964163938	990719244	1016529846	1043349620	1071912603	1101240545	1131095541	1159220113	1186384756	1212035036	1235222835	1256698596	1276830008	1297059239	1317673957	1338009609	1358992800	1382326011	1405938773	1428557744	1451742188	1476236205	1502192372	1528559240	1554321275	1579651917	1604095270	1627147885	1649557492	1671877438	1693960469	1715764488	1737429846	1758263635	1777464322	1795374943	1812475067	1828744767	1844349334	1859450104	1874487158
Europe & Central Asia (IDA & IBRD countries)	TEC	Population, total	SP.POP.TOTL	308759361	313483586	318186127	322961499	327774760	332375189	336304737	340454289	344535295	348509849	352139347	355796328	359698417	363554198	367431547	371336064	375469327	379635878	383687824	387559928	391562181	395441598	399353523	403378262	407686015	411980043	416211558	420430601	424466137	428221424	430990546	433132067	434844449	436152186	437106291	437796116	438325526	438638046	438735255	438650260	438423541	438100368	437806951	437905932	438136036	438333196
Togo	TGO	Population, total	SP.POP.TOTL	1673110	1702717	1732959	1765072	1803440	1853771	1918513	1995890	2080226	2164814	2244773	2317976	2384994	2448749	2511760	2574622	2637796	2701894	2768148	2839854	2920894	3013043	3115042	3222899	3332837	3441091	3547952	3657508	3769742	3883411	3998761	4115560	4233617	4207453	4222940	4410832	4577860	4725030	4860913	5000269	5140037	5277382	5413274	5552167	5696508	5844631
Thailand	THA	Population, total	SP.POP.TOTL	26851747	27650334	28481040	29342322	30232141	31149337	32086071	33037801	34002560	34973782	35954408	36937387	37933929	38947787	39952891	40940005	41896504	42843974	43788976	44718434	45650022	46575855	47494577	48423309	49351708	50270753	51177834	52074105	52969595	53848956	54738329	55637434	56528834	57408198	58260854	59098232	59920064	60724584	61522630	62299043	63007815	63651141	64266437	64868166	65452047	66017420
Tajikistan	TJK	Population, total	SP.POP.TOTL	2112131	2181805	2255026	2331736	2411260	2492998	2577184	2664130	2753848	2845273	2936779	3028837	3123691	3222290	3324499	3430425	3540076	3653265	3768508	3882691	3995256	4109022	4227171	4350874	4480026	4619003	4772139	4939059	5114989	5267249	5398768	5541205	5649400	5724993	5825368	5948584	6066523	6139829	6176397	6208370	6284735	6407377	6531669	6658575	6790547	6924720
Turkmenistan	TKM	Population, total	SP.POP.TOTL	1643457	1695400	1749214	1804272	1859997	1915916	1971737	2027403	2083069	2139024	2195616	2253119	2311430	2370919	2432028	2494570	2558521	2623948	2691088	2760358	2832203	2907187	2985557	3067534	3154079	3247534	3347809	3452731	3559363	3662459	3760562	3855894	3944689	4032407	4116662	4191203	4263819	4336730	4410507	4492170	4582677	4675409	4769465	4863865	4958093	5052257
Latin America & the Caribbean (IDA & IBRD countries)	TLA	Population, total	SP.POP.TOTL	208671107	214582669	220668336	226899749	233255631	239708690	246239963	252838271	259494716	266211242	272962813	279784152	286726529	293783764	300937685	308171037	315490913	322954210	330579364	338302777	346105657	353922621	361763155	369728268	377777260	385830246	393862440	401890697	409945610	418004229	426091608	434138780	442150885	450131381	458042874	465939463	473775482	481555614	489346270	497065139	504556065	511809816	518881965	525787222	532556401	539188798
Timor-Leste	TLS	Population, total	SP.POP.TOTL	468118	475291	482774	490564	498659	507034	515696	524648	533875	543356	553069	562966	572962	582855	590827	598158	607620	618315	628775	638719	649871	660493	669149	677707	686777	696665	707185	718476	730745	744856	760345	778278	799318	821437	844493	868146	892282	917184	942530	834697	745088	812249	879159	916878	929074	948311
Middle East, North Africa, Afghanistan & Pakistan (IDA & IBRD)	TMN	Population, total	SP.POP.TOTL	151883053	155796245	159849264	164082777	168474397	173012080	177756891	182734055	187877692	193184368	198631041	204099318	209697605	215569107	221668657	228187384	235058983	242098387	249392069	256976193	264948525	273288518	281844787	290721921	300042126	309566339	319257806	329101677	339013669	349120795	359343952	369541810	379832349	390108809	400109102	409972623	419780929	429628398	439699399	449944988	460058369	470225878	480465143	491133637	502381957	513920381
Tonga	TON	Population, total	SP.POP.TOTL	66170	68037	69940	71885	73879	75924	78002	79814	81353	82885	84401	85896	87356	88805	90683	93017	95325	96725	97204	97544	97769	97909	97980	97998	97990	97984	98010	98376	98969	99403	99700	99895	100022	100103	100166	100225	100275	100674	101388	102046	102677	103288	103874	104464	105071	105671
South Asia (IDA & IBRD)	TSA	Population, total	SP.POP.TOTL	507919318	520416897	533162544	546111213	559361410	572498343	585381018	598618725	612171905	625773349	640078209	654081362	668383197	684000704	700247383	717092514	734217635	751760482	769329109	787440583	806369775	825638560	845349352	865442337	885894499	906622025	927646189	948802143	970044151	991571016	1013297018	1035058149	1057074570	1079256381	1101305517	1123515559	1145998648	1168625898	1191405930	1214263809	1237185482	1260149056	1282584796	1304347790	1325950587	1346886384
Sub-Saharan Africa (IDA & IBRD countries)	TSS	Population, total	SP.POP.TOTL	227706653	233241597	239026415	245034711	251292534	257806104	264528156	271499400	278774032	286291766	294071521	302095262	310303050	318974077	328098223	337484491	347140248	356939418	367476902	378695833	389959247	401805572	414407128	426899800	439338948	452261445	465510912	479171693	492983652	507001395	521314712	535621670	550274082	565570780	580801913	596382250	612553970	628853819	645803591	663257231	681125107	699588585	718662153	738316131	758653144	779665113
Trinidad and Tobago	TTO	Population, total	SP.POP.TOTL	844943	863144	880194	896804	912963	928425	942937	956418	969006	980706	991471	1002585	1014921	1027851	1040761	1053469	1066311	1079554	1093380	1107639	1121744	1135132	1147927	1160534	1172984	1187366	1203124	1217364	1230069	1241600	1252208	1262171	1271674	1280466	1288341	1295169	1300928	1305836	1310225	1314708	1319774	1325567	1332011	1338709	1345380	1294494
Tunisia	TUN	Population, total	SP.POP.TOTL	4267288	4316278	4369136	4427131	4489869	4561385	4652287	4760970	4879899	5004697	5131396	5261658	5396557	5537242	5684674	5839262	5996994	6155931	6309390	6456419	6606195	6758284	6908642	7053800	7220044	7409903	7600301	7789987	7974440	8151660	8324509	8501827	8682512	8857910	9018448	9161258	9294432	9421270	9541667	9655963	9764935	9869677	9971515	10071632	10166163	10255472
Turkiye	TUR	Population, total	SP.POP.TOTL	28329898	29119238	29916147	30726841	31543072	32345220	33177672	34050421	34921684	35787774	36638465	37518611	38430221	39329533	40210234	41053126	41899984	42773298	43645306	44510429	45408815	46321190	47322096	48447410	49574069	50687115	51777772	52843670	53909626	54976723	56015628	57009887	57990118	58999167	60033836	61024503	61951134	62852966	63734383	64591923	65425961	66245128	67048795	67831730	68592617	69329557
Tuvalu	TUV	Population, total	SP.POP.TOTL	5598	5648	5699	5751	5752	5715	5686	5652	5624	5631	5663	5685	5692	5681	5822	6117	6404	6686	6957	7184	7366	7526	7664	7789	7902	8046	8217	8371	8518	8662	8798	8928	9038	9126	9207	9280	9342	9400	9451	9496	9544	9586	9623	9695	9816	9940
Tanzania	TZA	Population, total	SP.POP.TOTL	9901419	10187886	10487756	10799528	11127826	11470728	11827459	12200109	12602076	13036700	13492677	13971451	14479308	15010101	15561630	16138361	16736211	17352929	17976566	18592038	19189769	19784703	20398571	21079874	21779066	22501693	23258959	24030378	24769686	25438759	26110207	26780436	27457588	28332692	29442356	30383497	30945762	31578089	32420458	33300330	34260139	35198299	36121304	37089555	38109668	39182076
Uganda	UGA	Population, total	SP.POP.TOTL	7640973	7862217	8092231	8333663	8586363	8849203	9122864	9408924	9708632	10014858	10321603	10618206	10885796	11144236	11424846	11725240	12037294	12359669	12692113	13002163	13275741	13556452	13873631	14221881	14607677	15023681	15467579	15954170	16470483	17010698	17569897	18155901	18785032	19445161	20108801	20665667	21231550	21856046	22515806	23257281	24000150	24745676	25532870	26352124	27154515	27963289
Ukraine	UKR	Population, total	SP.POP.TOTL	42824093	43399766	43943674	44462372	44951156	45386892	45802519	46215988	46614325	46976256	47261306	47573287	47946893	48277121	48576570	48865229	49120842	49336481	49521243	49721381	49955152	50189281	50402724	50637029	50887599	51108770	51318745	51515732	51724853	51917817	52054092	52170961	52323671	52350126	52075998	51665539	51226109	50786885	50379731	49976446	49556660	49106855	48677281	48315136	47979507	47585556
Upper middle income	UMC	Population, total	SP.POP.TOTL	1149653372	1155585967	1174054217	1204001559	1233716139	1264038910	1297805820	1330989567	1365250009	1401337527	1438175379	1475716769	1511690371	1546811742	1580570358	1612227500	1642473603	1671398930	1700492780	1729895531	1759188322	1789774534	1822722888	1855424369	1887255119	1919685969	1953571641	1988890401	2024305816	2059000415	2092646700	2124538033	2154585863	2182939692	2210505244	2237605345	2264443158	2290953835	2316706589	2341274091	2365022283	2387807616	2409341702	2430373908	2451601935	2472862826
Uruguay	URY	Population, total	SP.POP.TOTL	2529957	2562044	2593298	2623766	2653180	2681169	2707646	2732277	2754606	2773974	2790807	2806462	2821644	2837133	2853944	2872320	2891392	2909461	2925715	2939903	2951953	2963246	2975492	2988778	3002488	3017037	3032845	3049896	3067961	3086255	3104403	3122354	3139702	3156345	3172834	3189440	3206324	3223345	3239280	3254015	3266206	3274251	3278867	3281186	3283148	3285771
United States	USA	Population, total	SP.POP.TOTL	180671000	183691000	186538000	189242000	191889000	194303000	196560000	198712000	200706000	202677000	205052000	207661000	209896000	211909000	213854000	215973000	218035000	220239000	222585000	225055000	227225000	229466000	231664000	233792000	235825000	237924000	240133000	242289000	244499000	246819000	249623000	252981000	256514000	259919000	263126000	266278000	269394000	272657000	275854000	279040000	282162411	284968955	287625193	290107933	292805298	295516599
Uzbekistan	UZB	Population, total	SP.POP.TOTL	8209109	8517711	8854368	9202246	9557611	9921681	10289294	10659180	11032155	11403150	11762638	12111511	12465106	12831047	13209011	13598521	13998620	14408822	14816349	15215587	15619936	16035032	16462736	16908400	17378846	17875339	18395621	18930070	19460630	19977183	20464956	20962910	21485090	21987955	22463291	22917589	23351981	23758960	24134929	24476008	24787054	25090283	25399980	25711259	26029350	26356975
St. Vincent and the Grenadines	VCT	Population, total	SP.POP.TOTL	84388	85870	87236	88523	89749	90927	92052	93124	94123	95058	95964	96872	97790	98691	99556	100387	101197	101999	102775	103478	104213	105073	105969	106838	107687	108506	109281	110001	110658	111272	111812	112222	112509	112735	112918	113047	113119	113141	113180	113366	113545	113501	113347	113141	112835	112450
Venezuela, RB	VEN	Population, total	SP.POP.TOTL	8160090	8455915	8756870	9064021	9377712	9697790	10024854	10358513	10697530	11040280	11387790	11741008	12099180	12463537	12835351	13215892	13606284	14006812	14416684	14834552	15258218	15687297	16121874	16562205	17008841	17461434	17923536	18394963	18871020	19348921	19827010	20304896	20780948	21254520	21725188	22193821	22662113	23131685	23601337	24066593	24526708	24979922	25435671	25892703	26340838	26785804
British Virgin Islands	VGB	Population, total	SP.POP.TOTL	7950	8034	8070	8114	8168	8257	8413	8646	9000	9533	9933	10095	10235	10367	10494	10606	10709	10800	10886	10965	11130	11479	11921	12370	12820	13269	13726	14194	14680	15180	15704	16187	16593	16989	17406	17840	18287	18756	19238	19730	20241	20796	21430	22134	22881	23665
Virgin Islands (U.S.)	VIR	Population, total	SP.POP.TOTL	32500	34300	35000	39800	40800	43500	46200	49100	55700	60300	63476	70937	76319	84121	89941	94484	96166	93203	95929	96183	99636	99853	100068	100348	100600	100760	100842	100901	100952	101041	103963	104807	105712	106578	107318	107818	108095	108357	108537	108599	108642	108549	108509	108505	108466	108453
Viet Nam	VNM	Population, total	SP.POP.TOTL	32531933	33409059	34288560	35249101	36201563	37129656	38024836	38895080	39734609	40582096	41475230	42449276	43429168	44409861	45413537	46482903	47684931	48954872	50249552	51378211	52490101	53738141	55011289	56337921	57706067	59060622	60347048	61584651	62843228	64147348	65504552	66891775	68260337	69586384	70854391	72049940	73156447	74226889	75299660	76287452	77154011	77969361	78772224	79563777	80338971	81088313
Vanuatu	VUT	Population, total	SP.POP.TOTL	64431	66264	68174	70159	72219	74358	76590	78921	81314	83755	86266	88862	91562	94362	97260	100269	103388	106618	109963	113040	115660	118249	121035	123998	127109	130356	133720	137187	140756	144393	148063	151793	155608	159463	163314	167137	170911	174626	178313	182048	186281	191031	195863	200746	205711	210760
World	WLD	Population, total	SP.POP.TOTL	3021512598	3062768116	3117372187	3184063049	3251253200	3318997522	3389087189	3459015356	3530703561	3604815552	3680589045	3758613546	3834446322	3911068458	3987294240	4062070771	4135758539	4208958804	4283431043	4360056401	4437602892	4516926190	4599539241	4682924536	4766040300	4850740788	4937711562	5027030278	5117167006	5207654866	5299246757	5388496229	5477123966	5564778621	5650853178	5736505517	5822614627	5908466558	5994040064	6078404337	6161884811	6245112906	6327557399	6409750441	6492769815	6575841506
Samoa	WSM	Population, total	SP.POP.TOTL	112490	115496	118597	121764	124894	127978	131073	133764	136020	138233	140400	142503	144538	146516	149431	153344	157113	159753	161375	162882	164322	165678	166484	166714	166796	166849	167061	167661	168346	168768	169042	169368	170331	171774	173159	174571	176071	177547	178905	180275	181685	183166	184471	185430	186249	186978
Kosovo	XKX	Population, total	SP.POP.TOTL	984846	1011421	1036950	1062737	1090270	1120168	1152586	1187667	1214208	1231460	1249555	1273021	1301579	1331176	1363123	1397686	1434880	1474457	1516249	1559787	1604818	1646565	1683166	1719245	1756818	1796018	1836972	1880590	1917882	1946339	1973790	2005362	2039723	2072664	2105256	2137514	2168753	2197284	2078964	1871524	1802493	1820009	1829462	1826434	1822773	1818354
Yemen, Rep.	YEM	Population, total	SP.POP.TOTL	5532301	5655232	5782221	5911135	6048006	6195593	6351494	6516444	6690524	6875859	7065279	7257462	7460068	7672796	7896783	8133598	8384113	8648222	8926586	9224194	9543358	9882362	10241006	10621499	11025597	11453825	11901040	12369912	12859708	13364174	13887862	14430201	14989494	15563914	16149147	16740058	17313177	17873936	18446013	19029420	19624141	20226147	20835086	21456379	22095167	22790085
South Africa	ZAF	Population, total	SP.POP.TOTL	16440172	16908035	17418522	17954564	18511361	19089380	19690087	20314066	20957287	21614676	22279984	22942143	23609456	24294263	24989108	25690940	26395450	27118952	27869507	28634162	29518857	30541044	31615339	32739304	33892788	35042093	36180515	37326190	38480649	39628575	40746268	41687898	42443509	43297156	44004139	44541554	45123018	45666838	46223880	46730335	47159719	47566800	48019415	48500348	48991421	49490033
Zambia	ZMB	Population, total	SP.POP.TOTL	3153729	3254086	3358099	3465907	3577017	3692086	3812003	3936343	4065593	4197116	4321718	4442525	4569309	4702693	4842746	4990086	5143842	5302480	5465374	5631728	5802833	5983289	6178637	6381038	6580490	6780953	6986471	7191282	7391440	7589216	7786169	7981650	8176680	8373921	8576269	8785763	9004053	9237063	9482408	9740005	10017631	10325185	10647949	10983595	11338198	11718819
Zimbabwe	ZWE	Population, total	SP.POP.TOTL	3809389	3930401	4055959	4185877	4320006	4458462	4601217	4748307	4900440	5058181	5215918	5374712	5542445	5720404	5908328	6098658	6287105	6449512	6543575	6647556	7041303	7498635	7796496	8098404	8391488	8686813	8982578	9284644	9583094	9864798	10137281	10404816	10702700	10860288	10873148	10974599	11158360	11369827	11594297	11783458	11892055	11971901	12087653	12232323	12365896	12483432
[truncated: 19 more columns]

## Sheet: ACLED
event_id_cnty	event_date	year	time_precision	disorder_type	event_type	sub_event_type	actor1	assoc_actor_1	inter1	actor2	assoc_actor_2	inter2	interaction	civilian_targeting	iso	region	country	admin1	admin2	admin3	location	latitude	longitude	geo_precision	source	source_scale	notes	fatalities	tags	timestamp
ZIM1	1997-04-09	1997	1	Demonstrations	Protests	Peaceful protest	Protesters (Zimbabwe)	ZCTU: Zimbabwe Congress of Trade Unions; Students (Zimbabwe)	Protesters				Protesters only		716	Southern Africa	Zimbabwe	Harare	Harare Urban		Harare	-17.8277	31.0534	1	All Africa	International	Students protested government making them pay half university fees	0		1618597779
ZIM2	1997-07-21	1997	1	Demonstrations	Riots	Violent demonstration	Rioters (Zimbabwe)	ZNLWVA: Zimbabwe National Liberation War Veterans Association	Rioters				Rioters only		716	Southern Africa	Zimbabwe	Harare	Harare Urban		Harare	-17.8277	31.0534	1	Reuters	International	War vets protest at governments handling of compensation fund	0		1618597779
ZIM3	1997-07-22	1997	1	Demonstrations	Riots	Violent demonstration	Rioters (Zimbabwe)	ZNLWVA: Zimbabwe National Liberation War Veterans Association	Rioters				Rioters only		716	Southern Africa	Zimbabwe	Harare	Harare Urban		Harare	-17.8277	31.0534	1	Reuters	International	War vets protest at governments handling of compensation fund outside American-African summit	0		1618597779
ZIM4	1997-08-14	1997	1	Political violence	Riots	Mob violence	Rioters (Zimbabwe)	ZNLWVA: Zimbabwe National Liberation War Veterans Association	Rioters	Civilians (Zimbabwe)	ZANU-PF: Zimbabwe African National Union-Patriotic Front	Civilians	Rioters-Civilians	Civilian targeting	716	Southern Africa	Zimbabwe	Harare	Harare Urban		Harare	-17.8277	31.0534	1	Africa Research Bulletin	Other	War vets loot Zanu-PF headquarters	0		1618597779
ZIM5	1997-08-18	1997	1	Demonstrations	Riots	Violent demonstration	Rioters (Zimbabwe)	Prisoners (Zimbabwe)	Rioters	Police Forces of Zimbabwe (2017-) Prison Guards		State forces	State forces-Rioters		716	Southern Africa	Zimbabwe	Harare	Harare Urban		Harare	-17.8277	31.0534	1	Reuters	International	1 guard
ZIM6	1997-10-02	1997	1	Demonstrations	Protests	Peaceful protest	Protesters (Zimbabwe)	ZNLWVA: Zimbabwe National Liberation War Veterans Association	Protesters				Protesters only		716	Southern Africa	Zimbabwe	Harare	Harare Urban		Harare	-17.8277	31.0534	1	Reuters	International	Roughly 500 war vets protest governments compensation plan	0		1618597779
ZIM7	1997-10-04	1997	1	Demonstrations	Protests	Peaceful protest	Protesters (Zimbabwe)	Farmers (Zimbabwe)	Protesters				Protesters only		716	Southern Africa	Zimbabwe	Harare	Harare Urban		Harare	-17.8277	31.0534	1	Times (South Africa)	International	Strike:Farm workers strike	0		1618597779
ZIM8	1997-10-05	1997	1	Demonstrations	Protests	Peaceful protest	Protesters (Zimbabwe)	Farmers (Zimbabwe)	Protesters				Protesters only		716	Southern Africa	Zimbabwe	Harare	Harare Urban		Harare	-17.8277	31.0534	1	Times (South Africa)	International	Strike:Farm workers strike	0		1618597779
ZIM9	1997-10-06	1997	1	Demonstrations	Protests	Peaceful protest	Protesters (Zimbabwe)	Farmers (Zimbabwe)	Protesters				Protesters only		716	Southern Africa	Zimbabwe	Harare	Harare Urban		Harare	-17.8277	31.0534	1	Times (South Africa)	International	Strike:Farm workers strike	0		1618597779
ZIM10	1997-10-07	1997	1	Demonstrations	Protests	Peaceful protest	Protesters (Zimbabwe)	Farmers (Zimbabwe)	Protesters				Protesters only		716	Southern Africa	Zimbabwe	Harare	Harare Urban		Harare	-17.8277	31.0534	1	Times (South Africa)	International	Strike:Farm workers strike	0		1618597779
ZIM12	1997-10-08	1997	1	Demonstrations	Protests	Peaceful protest	Protesters (Zimbabwe)	Farmers (Zimbabwe)	Protesters				Protesters only		716	Southern Africa	Zimbabwe	Harare	Harare Urban		Harare	-17.8277	31.0534	1	Times (South Africa)	International	Strike:Farm workers strike	0		1618597779
ZIM11	1997-10-08	1997	1	Demonstrations	Riots	Violent demonstration	Rioters (Zimbabwe)	Farmers (Zimbabwe)	Rioters	Rioters (Zimbabwe)	Farmers (Zimbabwe)	Rioters	Rioters-Rioters		716	Southern Africa	Zimbabwe	Mashonaland West	Zvimba		Trelawney	-17.5333	30.45	1	Times (South Africa)	International	On 8 October 1997
ZIM14	1997-10-09	1997	1	Demonstrations	Protests	Peaceful protest	Protesters (Zimbabwe)	Farmers (Zimbabwe)	Protesters				Protesters only		716	Southern Africa	Zimbabwe	Harare	Harare Urban		Harare	-17.8277	31.0534	1	Times (South Africa)	International	Strike:Farm workers strike	0		1618597779
ZIM13	1997-10-09	1997	1	Demonstrations	Riots	Violent demonstration	Rioters (Zimbabwe)	Farmers (Zimbabwe)	Rioters	Rioters (Zimbabwe)	Farmers (Zimbabwe)	Rioters	Rioters-Rioters		716	Southern Africa	Zimbabwe	Mashonaland West	Zvimba		Trelawney	-17.5333	30.45	1	Times (South Africa)	International	On 9 October 1997
ZIM16	1997-10-10	1997	1	Demonstrations	Protests	Peaceful protest	Protesters (Zimbabwe)	Farmers (Zimbabwe)	Protesters				Protesters only		716	Southern Africa	Zimbabwe	Harare	Harare Urban		Harare	-17.8277	31.0534	1	Times (South Africa)	International	Strike:Farm workers strike	0		1618597779
ZIM15	1997-10-10	1997	1	Demonstrations	Riots	Violent demonstration	Rioters (Zimbabwe)	ZNLWVA: Zimbabwe National Liberation War Veterans Association	Rioters	Police Forces of Zimbabwe (1987-2017)		State forces	State forces-Rioters		716	Southern Africa	Zimbabwe	Harare	Harare Urban		Harare	-17.8277	31.0534	1	Times (South Africa)	International	Roughly 300 war vets riot in court as investigations in to fraud in compensation take place	0		1618597779
ZIM17	1997-10-11	1997	1	Demonstrations	Protests	Peaceful protest	Protesters (Zimbabwe)	Farmers (Zimbabwe)	Protesters				Protesters only		716	Southern Africa	Zimbabwe	Harare	Harare Urban		Harare	-17.8277	31.0534	1	Times (South Africa)	International	Strike:Farm workers strike	0		1618597779
ZIM18	1997-12-05	1997	1	Political violence	Violence against civilians	Attack	Unidentified Armed Group (Zimbabwe)		Political militia	Civilians (Zimbabwe)		Civilians	Political militia-Civilians	Civilian targeting	716	Southern Africa	Zimbabwe	Harare	Harare Urban		Harare	-17.8277	31.0534	1	Reuters	International	Mugabes car damaged as he went to meet Chiluba	0		1618597779
ZIM19	1997-12-07	1997	1	Demonstrations	Protests	Protest with intervention	Protesters (Zimbabwe)		Protesters	Police Forces of Zimbabwe (1987-2017)		State forces	State forces-Protesters		716	Southern Africa	Zimbabwe	Harare	Harare Urban		Harare	-17.8277	31.0534	1	Reuters	International	Protests against proposed tax changes met with tear gas from police	0		1618597779
ZIM20	1997-12-09	1997	1	Demonstrations	Protests	Peaceful protest	Protesters (Zimbabwe)		Protesters				Protesters only		716	Southern Africa	Zimbabwe	Harare	Harare Urban		Harare	-17.8277	31.0534	1	Financial Times	International	1 day stay away observed nationwide	0		1618597779
ZIM21	1997-12-11	1997	1	Political violence	Violence against civilians	Attack	Unidentified Armed Group (Zimbabwe)		Political militia	Civilians (Zimbabwe)		Civilians	Political militia-Civilians	Civilian targeting	716	Southern Africa	Zimbabwe	Harare	Harare Urban		Harare	-17.8277	31.0534	1	Reuters	International	Morgan Tsvangirai attacked in offices	0		1618597779
ZIM22	1998-01-19	1998	1	Demonstrations	Riots	Violent demonstration	Rioters (Zimbabwe)		Rioters	Police Forces of Zimbabwe (1987-2017)		State forces	State forces-Rioters		716	Southern Africa	Zimbabwe	Bulawayo	Bulawayo		Bulawayo	-20.15	28.58	1	Zimbabwe Human Rights NGO Forum	Other	Riots prompted by food price increases led to violent demonstrations and accusations of police brutality. At least 6 people killed	1		1618597779
ZIM24	1998-01-19	1998	1	Demonstrations	Riots	Violent demonstration	Rioters (Zimbabwe)		Rioters	Police Forces of Zimbabwe (1987-2017)		State forces	State forces-Rioters		716	Southern Africa	Zimbabwe	Harare	Harare Urban		Harare	-17.8277	31.0534	1	Zimbabwe Human Rights NGO Forum	Other	Riots prompted by food price increases led to violent demonstrations and accusations of police brutality. At least 6 people killed	1		1618597779
ZIM23	1998-01-19	1998	1	Demonstrations	Riots	Violent demonstration	Rioters (Zimbabwe)		Rioters	Police Forces of Zimbabwe (1987-2017)		State forces	State forces-Rioters		716	Southern Africa	Zimbabwe	Harare	Chitungwiza		Chitungwiza	-18.0127	31.0756	1	Zimbabwe Human Rights NGO Forum	Other	Riots prompted by food price increases led to violent demonstrations and accusations of police brutality. At least 6 people killed	1		1618597779
ZIM25	1998-01-20	1998	1	Demonstrations	Riots	Violent demonstration	Rioters (Zimbabwe)		Rioters	Police Forces of Zimbabwe (1987-2017)		State forces	State forces-Rioters		716	Southern Africa	Zimbabwe	Bulawayo	Bulawayo		Bulawayo	-20.15	28.58	1	Zimbabwe Human Rights NGO Forum	Other	Riots prompted by food price increases led to violent demonstrations and accusations of police brutality. At least 6 people killed	1		1618597779
ZIM28	1998-01-20	1998	1	Demonstrations	Riots	Violent demonstration	Rioters (Zimbabwe)		Rioters	Police Forces of Zimbabwe (1987-2017)		State forces	State forces-Rioters		716	Southern Africa	Zimbabwe	Harare	Chitungwiza		Chitungwiza	-18.0127	31.0756	1	Zimbabwe Human Rights NGO Forum	Other	Riots prompted by food price increases led to violent demonstrations and accusations of police brutality. At least 6 people killed	0		1618597779
ZIM29	1998-01-20	1998	1	Demonstrations	Riots	Violent demonstration	Rioters (Zimbabwe)		Rioters	Police Forces of Zimbabwe (1987-2017)		State forces	State forces-Rioters		716	Southern Africa	Zimbabwe	Midlands	Gweru Urban		Gweru	-19.45	29.82	1	Zimbabwe Human Rights NGO Forum	Other	Riots prompted by food price increases led to violent demonstrations and accusations of police brutality. At least 6 people killed	0		1618597779
ZIM26	1998-01-20	1998	1	Demonstrations	Riots	Violent demonstration	Rioters (Zimbabwe)		Rioters	Police Forces of Zimbabwe (1987-2017)		State forces	State forces-Rioters		716	Southern Africa	Zimbabwe	Mashonaland West	Chegutu Urban		Chegutu	-18.1333	30.15	1	Zimbabwe Human Rights NGO Forum	Other	Riots prompted by food price increases led to violent demonstrations and accusations of police brutality. At least 6 people killed	1		1618597779
ZIM30	1998-01-20	1998	1	Demonstrations	Riots	Violent demonstration	Rioters (Zimbabwe)		Rioters	Police Forces of Zimbabwe (1987-2017)		State forces	State forces-Rioters		716	Southern Africa	Zimbabwe	Harare	Harare Urban		Harare	-17.8277	31.0534	1	Zimbabwe Human Rights NGO Forum	Other	Riots prompted by food price increases led to violent demonstrations and accusations of police brutality. At least 6 people killed	0		1618597779
ZIM33	1998-01-21	1998	1	Demonstrations	Riots	Violent demonstration	Rioters (Zimbabwe)		Rioters	Police Forces of Zimbabwe (1987-2017)		State forces	State forces-Rioters		716	Southern Africa	Zimbabwe	Harare	Chitungwiza		Chitungwiza	-18.0127	31.0756	1	Zimbabwe Human Rights NGO Forum	Other	Riots prompted by food price increases led to violent demonstrations and accusations of police brutality. At least 6 people killed	0		1618597779
ZIM35	1998-01-21	1998	1	Demonstrations	Riots	Violent demonstration	Rioters (Zimbabwe)		Rioters	Police Forces of Zimbabwe (1987-2017)		State forces	State forces-Rioters		716	Southern Africa	Zimbabwe	Harare	Harare Urban		Harare	-17.8277	31.0534	1	Zimbabwe Human Rights NGO Forum	Other	Riots prompted by food price increases led to violent demonstrations and accusations of police brutality. At least 6 people killed	0		1618597779
ZIM32	1998-01-21	1998	1	Demonstrations	Riots	Violent demonstration	Rioters (Zimbabwe)		Rioters	Police Forces of Zimbabwe (1987-2017)		State forces	State forces-Rioters		716	Southern Africa	Zimbabwe	Mashonaland West	Chinhoyi Urban		Chinhoyi	-17.3666	30.2	1	Zimbabwe Human Rights NGO Forum	Other	Riots prompted by food price increases led to violent demonstrations and accusations of police brutality. At least 6 people killed	0		1618597779
ZIM34	1998-01-21	1998	1	Demonstrations	Riots	Violent demonstration	Rioters (Zimbabwe)		Rioters	Police Forces of Zimbabwe (1987-2017)		State forces	State forces-Rioters		716	Southern Africa	Zimbabwe	Midlands	Gweru Urban		Gweru	-19.45	29.82	1	Zimbabwe Human Rights NGO Forum	Other	Riots prompted by food price increases led to violent demonstrations and accusations of police brutality. At least 6 people killed	0		1618597779
ZIM31	1998-01-21	1998	1	Demonstrations	Riots	Violent demonstration	Rioters (Zimbabwe)		Rioters	Police Forces of Zimbabwe (1987-2017)		State forces	State forces-Rioters		716	Southern Africa	Zimbabwe	Mashonaland West	Chegutu Urban		Chegutu	-18.1333	30.15	1	Zimbabwe Human Rights NGO Forum	Other	Riots prompted by food price increases led to violent demonstrations and accusations of police brutality. At least 6 people killed	0		1618597779
ZIM39	1998-01-22	1998	1	Demonstrations	Riots	Violent demonstration	Rioters (Zimbabwe)		Rioters	Police Forces of Zimbabwe (1987-2017)		State forces	State forces-Rioters		716	Southern Africa	Zimbabwe	Harare	Chitungwiza		Chitungwiza	-18.0127	31.0756	1	Zimbabwe Human Rights NGO Forum	Other	Riots prompted by food price increases led to violent demonstrations and accusations of police brutality. At least 6 people killed	0		1618597779
ZIM38	1998-01-22	1998	1	Demonstrations	Riots	Violent demonstration	Rioters (Zimbabwe)		Rioters	Police Forces of Zimbabwe (1987-2017)		State forces	State forces-Rioters		716	Southern Africa	Zimbabwe	Mashonaland West	Chinhoyi Urban		Chinhoyi	-17.3666	30.2	1	Zimbabwe Human Rights NGO Forum	Other	Riots prompted by food price increases led to violent demonstrations and accusations of police brutality. At least 6 people killed	0		1618597779
ZIM40	1998-01-22	1998	1	Demonstrations	Riots	Violent demonstration	Rioters (Zimbabwe)		Rioters	Police Forces of Zimbabwe (1987-2017)		State forces	State forces-Rioters		716	Southern Africa	Zimbabwe	Midlands	Gweru Urban		Gweru	-19.45	29.82	1	Zimbabwe Human Rights NGO Forum	Other	Riots prompted by food price increases led to violent demonstrations and accusations of police brutality. At least 6 people killed	0		1618597779
ZIM41	1998-01-22	1998	1	Demonstrations	Riots	Violent demonstration	Rioters (Zimbabwe)		Rioters	Police Forces of Zimbabwe (1987-2017)		State forces	State forces-Rioters		716	Southern Africa	Zimbabwe	Harare	Harare Urban		Harare	-17.8277	31.0534	1	Zimbabwe Human Rights NGO Forum	Other	Riots prompted by food price increases led to violent demonstrations and accusations of police brutality. At least 6 people killed	0		1618597779
ZIM37	1998-01-22	1998	1	Demonstrations	Riots	Violent demonstration	Rioters (Zimbabwe)		Rioters	Police Forces of Zimbabwe (1987-2017)		State forces	State forces-Rioters		716	Southern Africa	Zimbabwe	Mashonaland West	Chegutu Urban		Chegutu	-18.1333	30.15	1	Zimbabwe Human Rights NGO Forum	Other	Riots prompted by food price increases led to violent demonstrations and accusations of police brutality. At least 6 people killed	0		1618597779
ZIM36	1998-01-22	1998	1	Demonstrations	Riots	Violent demonstration	Rioters (Zimbabwe)		Rioters	Police Forces of Zimbabwe (1987-2017)		State forces	State forces-Rioters		716	Southern Africa	Zimbabwe	Matabeleland South	Beitbridge Urban		Beitbridge	-22.2167	29.9833	1	Zimbabwe Human Rights NGO Forum	Other	Riots prompted by food price increases led to violent demonstrations and accusations of police brutality. At least 6 people killed	0		1618597779
ZIM44	1998-01-23	1998	1	Demonstrations	Riots	Violent demonstration	Rioters (Zimbabwe)		Rioters	Police Forces of Zimbabwe (1987-2017)		State forces	State forces-Rioters		716	Southern Africa	Zimbabwe	Harare	Harare Urban		Harare	-17.8277	31.0534	1	Zimbabwe Human Rights NGO Forum	Other	Riots prompted by food price increases led to violent demonstrations and accusations of police brutality. At least 6 people killed	0		1618597779
ZIM43	1998-01-23	1998	1	Demonstrations	Riots	Violent demonstration	Rioters (Zimbabwe)		Rioters	Police Forces of Zimbabwe (1987-2017)		State forces	State forces-Rioters		716	Southern Africa	Zimbabwe	Midlands	Gweru Urban		Gweru	-19.45	29.82	1	Zimbabwe Human Rights NGO Forum	Other	Riots prompted by food price increases led to violent demonstrations and accusations of police brutality. At least 6 people killed	0		1618597779
ZIM42	1998-01-23	1998	1	Demonstrations	Riots	Violent demonstration	Rioters (Zimbabwe)		Rioters	Police Forces of Zimbabwe (1987-2017)		State forces	State forces-Rioters		716	Southern Africa	Zimbabwe	Harare	Chitungwiza		Chitungwiza	-18.0127	31.0756	1	Zimbabwe Human Rights NGO Forum	Other	Riots prompted by food price increases led to violent demonstrations and accusations of police brutality. At least 6 people killed	0		1618597779
ZIM45	1998-02-14	1998	1	Political violence	Violence against civilians	Attack	ZANU-PF: Zimbabwe African National Union-Patriotic Front		Political militia	Civilians (Zimbabwe)	Women (Zimbabwe)	Civilians	Political militia-Civilians	Civilian targeting	716	Southern Africa	Zimbabwe	Harare	Chitungwiza		Chitungwiza	-18.0127	31.0756	1	Reuters	International	Margaret Dongo (independent MP) petrol bombed	0	women targeted: politicians	1638981224
ZIM47	1998-02-18	1998	1	Demonstrations	Protests	Peaceful protest	Protesters (Zimbabwe)	ZNLWVA: Zimbabwe National Liberation War Veterans Association	Protesters				Protesters only		716	Southern Africa	Zimbabwe	Masvingo	Masvingo Urban		Masvingo	-20.0833	30.8333	1	Reuters	International	War vets protest governments handling of compensation	0		1618597779
ZIM46	1998-02-18	1998	1	Demonstrations	Protests	Peaceful protest	Protesters (Zimbabwe)	ZNLWVA: Zimbabwe National Liberation War Veterans Association	Protesters				Protesters only		716	Southern Africa	Zimbabwe	Harare	Harare Urban		Harare	-17.8277	31.0534	1	Reuters	International	War vets protest governments handling of compensation	0		1618597779
ZIM48	1998-02-26	1998	1	Demonstrations	Protests	Peaceful protest	Protesters (Zimbabwe)	ZNLWVA: Zimbabwe National Liberation War Veterans Association	Protesters				Protesters only		716	Southern Africa	Zimbabwe	Harare	Harare Urban		Harare	-17.8277	31.0534	1	Xinhua	International	Liberation war collaborators protest at being left out of governments compensation scheme	0		1618597779
ZIM49	1998-02-27	1998	1	Demonstrations	Protests	Peaceful protest	Protesters (Zimbabwe)	ZNLWVA: Zimbabwe National Liberation War Veterans Association	Protesters				Protesters only		716	Southern Africa	Zimbabwe	Harare	Harare Urban		Harare	-17.8277	31.0534	1	Xinhua	International	Liberation war collaborators protest at being left out of governments compensation scheme	0		1618597779
ZIM50	1998-02-28	1998	1	Demonstrations	Protests	Peaceful protest	Protesters (Zimbabwe)	ZNLWVA: Zimbabwe National Liberation War Veterans Association	Protesters				Protesters only		716	Southern Africa	Zimbabwe	Harare	Harare Urban		Harare	-17.8277	31.0534	1	Xinhua	International	Liberation war collaborators protest at being left out of governments compensation scheme	0		1618597779
ZIM51	1998-03-02	1998	1	Demonstrations	Protests	Peaceful protest	Protesters (Zimbabwe)	Students (Zimbabwe)	Protesters				Protesters only		716	Southern Africa	Zimbabwe	Bulawayo	Bulawayo		Bulawayo	-20.15	28.58	1	All Africa	International	Students boycott classes in an attempt to force government to increase their grants and loans by 253%	0		1618597779
ZIM53	1998-03-03	1998	1	Demonstrations	Protests	Peaceful protest	Protesters (Zimbabwe)	ZCTU: Zimbabwe Congress of Trade Unions	Protesters				Protesters only		716	Southern Africa	Zimbabwe	Midlands	Gweru Urban		Gweru	-19.45	29.82	1	Xinhua	International	Stayaway in protest at tax reforms	0		1618597779
ZIM54	1998-03-03	1998	1	Demonstrations	Protests	Peaceful protest	Protesters (Zimbabwe)	ZCTU: Zimbabwe Congress of Trade Unions	Protesters				Protesters only		716	Southern Africa	Zimbabwe	Harare	Harare Urban		Harare	-17.8277	31.0534	1	Xinhua	International	Stayaway in protest at tax reforms	0		1618597779
ZIM52	1998-03-03	1998	1	Demonstrations	Protests	Peaceful protest	Protesters (Zimbabwe)	ZCTU: Zimbabwe Congress of Trade Unions	Protesters				Protesters only		716	Southern Africa	Zimbabwe	Bulawayo	Bulawayo		Bulawayo	-20.15	28.58	1	Xinhua	International	Stayaway in protest at tax reforms	0		1618597779
ZIM56	1998-03-03	1998	1	Demonstrations	Protests	Peaceful protest	Protesters (Zimbabwe)	ZCTU: Zimbabwe Congress of Trade Unions	Protesters				Protesters only		716	Southern Africa	Zimbabwe	Manicaland	Mutare Urban		Mutare	-18.9707	32.6709	1	Xinhua	International	Stayaway in protest at tax reforms	0		1618597779
ZIM57	1998-03-03	1998	1	Demonstrations	Protests	Peaceful protest	Protesters (Zimbabwe)	Students (Zimbabwe)	Protesters				Protesters only		716	Southern Africa	Zimbabwe	Bulawayo	Bulawayo		Bulawayo	-20.15	28.58	1	All Africa	International	Students boycott classes in an attempt to force government to increase their grants and loans by 253%	0		1618597779
ZIM55	1998-03-03	1998	1	Demonstrations	Protests	Peaceful protest	Protesters (Zimbabwe)	ZCTU: Zimbabwe Congress of Trade Unions	Protesters				Protesters only		716	Southern Africa	Zimbabwe	Harare	Harare Urban		Harare	-17.8277	31.0534	1	Xinhua	International	Stayaway in protest at tax reforms - countrywide. Economy shut down by 80%	0		1618597779
ZIM59	1998-03-04	1998	1	Demonstrations	Protests	Peaceful protest	Protesters (Zimbabwe)	Students (Zimbabwe)	Protesters				Protesters only		716	Southern Africa	Zimbabwe	Bulawayo	Bulawayo		Bulawayo	-20.15	28.58	1	All Africa	International	Students boycott classes in an attempt to force government to increase their grants and loans by 253%	0		1618597779
ZIM58	1998-03-04	1998	1	Demonstrations	Protests	Peaceful protest	Protesters (Zimbabwe)	ZCTU: Zimbabwe Congress of Trade Unions	Protesters				Protesters only		716	Southern Africa	Zimbabwe	Harare	Harare Urban		Harare	-17.8277	31.0534	1	Xinhua	International	Stayaway in protest at tax reforms countrywide. Day 2	0		1618597779
ZIM60	1998-03-05	1998	1	Demonstrations	Protests	Peaceful protest	Protesters (Zimbabwe)	Students (Zimbabwe)	Protesters				Protesters only		716	Southern Africa	Zimbabwe	Bulawayo	Bulawayo		Bulawayo	-20.15	28.58	1	All Africa	International	Students boycott classes in an attempt to force government to increase their grants and loans by 253%	0		1618597779
ZIM61	1998-03-06	1998	1	Demonstrations	Protests	Peaceful protest	Protesters (Zimbabwe)	Students (Zimbabwe)	Protesters				Protesters only		716	Southern Africa	Zimbabwe	Bulawayo	Bulawayo		Bulawayo	-20.15	28.58	1	All Africa	International	Students dispersed by tear gas after protesting outside city hall	0		1618597779
ZIM64	1998-03-09	1998	1	Political violence	Violence against civilians	Attack	Police Forces of Zimbabwe (1987-2017)		State forces	Civilians (Zimbabwe)	Students (Zimbabwe)	Civilians	State forces-Civilians	Civilian targeting	716	Southern Africa	Zimbabwe	Bulawayo	Bulawayo		Bulawayo	-20.15	28.58	1	Times (South Africa)	International	Police fire at demonstrating students
ZIM62	1998-03-09	1998	1	Demonstrations	Protests	Peaceful protest	Protesters (Zimbabwe)	Students (Zimbabwe)	Protesters				Protesters only		716	Southern Africa	Zimbabwe	Midlands	Gweru Urban		Gweru	-19.45	29.82	1	Times (South Africa)	International	Students demonstrate	0		1618597779
ZIM65	1998-03-09	1998	1	Political violence; Demonstrations	Protests	Excessive force against protesters	Police Forces of Zimbabwe (1987-2017)		State forces	Protesters (Zimbabwe)	Students (Zimbabwe)	Protesters	State forces-Protesters	Civilian targeting	716	Southern Africa	Zimbabwe	Harare	Harare Urban		Harare	-17.8277	31.0534	1	Times (South Africa)	International	Police baton-charge demonstrating students	0		1618597779
ZIM63	1998-03-09	1998	1	Demonstrations	Protests	Peaceful protest	Protesters (Zimbabwe)	Students (Zimbabwe)	Protesters				Protesters only		716	Southern Africa	Zimbabwe	Manicaland	Mutare Urban		Mutare	-18.9707	32.6709	1	Times (South Africa)	International	Students demonstrate	0		1618597779
ZIM68	1998-03-24	1998	1	Demonstrations	Protests	Protest with intervention	Protesters (Zimbabwe)	Women (Zimbabwe)	Protesters	Police Forces of Zimbabwe (1987-2017)		State forces	State forces-Protesters		716	Southern Africa	Zimbabwe	Harare	Harare Urban		Harare	-17.8277	31.0534	1	Guardian (United Kingdom)	International	On 24 March 1998
ZIM69	1998-04-02	1998	1	Political violence	Violence against civilians	Attack	Mutiny of Military Forces of Zimbabwe (1987-2017)		State forces	Civilians (Zimbabwe)		Civilians	State forces-Civilians	Civilian targeting	716	Southern Africa	Zimbabwe	Harare	Harare Urban		Harare	-17.8277	31.0534	1	Reuters	International	Member of Mugabes guard shot by fellow soldier in unknown circumstances	1		1618597779
ZIM70	1998-04-22	1998	1	Demonstrations	Protests	Protest with intervention	Protesters (Zimbabwe)	Students (Zimbabwe)	Protesters	Police Forces of Zimbabwe (1987-2017)		State forces	State forces-Protesters		716	Southern Africa	Zimbabwe	Harare	Harare Urban		Harare	-17.8277	31.0534	1	All Africa	International	Students and some staff of University of Harare prevented from marching against privatisation of accommodation and catering services	0		1618597779
ZIM71	1998-04-22	1998	1	Political violence; Demonstrations	Protests	Excessive force against protesters	Police Forces of Zimbabwe (1987-2017)		State forces	Protesters (Zimbabwe)	Students (Zimbabwe)	Protesters	State forces-Protesters	Civilian targeting	716	Southern Africa	Zimbabwe	Harare	Harare Urban		Harare	-17.8277	31.0534	1	All Africa	International	Students and some staff of University of Harare prevented from marching against privatisation of accommodation and catering services - police shoot and injure at least 1 student	0		1618597779
ZIM72	1998-04-24	1998	1	Demonstrations	Riots	Violent demonstration	Rioters (Zimbabwe)	Students (Zimbabwe)	Rioters	Police Forces of Zimbabwe (1987-2017)		State forces	State forces-Rioters		716	Southern Africa	Zimbabwe	Harare	Harare Urban		Harare	-17.8277	31.0534	1	Reuters	International	Students protesting previous shooting of colleague met by police with shotguns
ZIM73	1998-04-29	1998	1	Demonstrations	Protests	Protest with intervention	Protesters (Zimbabwe)	Students (Zimbabwe)	Protesters	Police Forces of Zimbabwe (1987-2017)		State forces	State forces-Protesters		716	Southern Africa	Zimbabwe	Harare	Harare Urban		Harare	-17.8277	31.0534	1	Reuters	International	5
ZIM74	1998-05-15	1998	1	Demonstrations	Protests	Protest with intervention	Protesters (Zimbabwe)		Protesters	Police Forces of Zimbabwe (1987-2017)		State forces	State forces-Protesters		716	Southern Africa	Zimbabwe	Harare	Harare Urban		Harare	-17.8277	31.0534	1	Reuters	International	Tobacco farmers protest low prices as growers withhold leaf	0		1618597779
ZIM75	1998-05-16	1998	1	Demonstrations	Protests	Protest with intervention	Protesters (Zimbabwe)		Protesters	Police Forces of Zimbabwe (1987-2017)		State forces	State forces-Protesters		716	Southern Africa	Zimbabwe	Harare	Harare Urban		Harare	-17.8277	31.0534	1	Reuters	International	Tobacco farmers protest low prices as growers withhold leaf	0		1618597779
ZIM76	1998-05-17	1998	1	Demonstrations	Protests	Protest with intervention	Protesters (Zimbabwe)		Protesters	Police Forces of Zimbabwe (1987-2017)		State forces	State forces-Protesters		716	Southern Africa	Zimbabwe	Harare	Harare Urban		Harare	-17.8277	31.0534	1	Reuters	International	Tobacco farmers protest low prices as growers withhold leaf	0		1618597779
ZIM77	1998-05-18	1998	1	Demonstrations	Protests	Protest with intervention	Protesters (Zimbabwe)		Protesters	Police Forces of Zimbabwe (1987-2017)		State forces	State forces-Protesters		716	Southern Africa	Zimbabwe	Harare	Harare Urban		Harare	-17.8277	31.0534	1	Reuters	International	Tobacco farmers protest low prices as growers withhold leaf	0		1618597779
ZIM78	1998-05-19	1998	1	Demonstrations	Protests	Protest with intervention	Protesters (Zimbabwe)		Protesters	Police Forces of Zimbabwe (1987-2017)		State forces	State forces-Protesters		716	Southern Africa	Zimbabwe	Harare	Harare Urban		Harare	-17.8277	31.0534	1	Reuters	International	Tobacco farmers protest low prices as growers withhold leaf	0		1618597779
ZIM79	1998-05-20	1998	1	Demonstrations	Protests	Protest with intervention	Protesters (Zimbabwe)		Protesters	Police Forces of Zimbabwe (1987-2017)		State forces	State forces-Protesters		716	Southern Africa	Zimbabwe	Harare	Harare Urban		Harare	-17.8277	31.0534	1	Reuters	International	Tobacco farmers protest low prices as growers withhold leaf	0		1618597779
ZIM80	1998-05-21	1998	1	Demonstrations	Protests	Protest with intervention	Protesters (Zimbabwe)		Protesters	Police Forces of Zimbabwe (1987-2017)		State forces	State forces-Protesters		716	Southern Africa	Zimbabwe	Harare	Harare Urban		Harare	-17.8277	31.0534	1	Reuters	International	Tobacco farmers protest low prices as growers withhold leaf	0		1618597779
ZIM81	1998-05-28	1998	1	Demonstrations	Protests	Peaceful protest	Protesters (Zimbabwe)	Students (Zimbabwe)	Protesters				Protesters only		716	Southern Africa	Zimbabwe	Harare	Harare Urban		Harare	-17.8277	31.0534	1	Reuters	International	Student protest against Mugabe	0		1618597779
ZIM82	1998-05-29	1998	1	Demonstrations	Protests	Peaceful protest	Protesters (Zimbabwe)	Students (Zimbabwe)	Protesters				Protesters only		716	Southern Africa	Zimbabwe	Harare	Harare Urban		Harare	-17.8277	31.0534	1	Reuters	International	Student protest against Mugabe	0		1618597779
ZIM83	1998-05-29	1998	1	Political violence	Violence against civilians	Attack	Police Forces of Zimbabwe (1987-2017)		State forces	Civilians (Zimbabwe)	Students (Zimbabwe)	Civilians	State forces-Civilians	Civilian targeting	716	Southern Africa	Zimbabwe	Harare	Harare Urban		Harare	-17.8277	31.0534	1	Reuters	International	Student protest against Mugabe
ZIM84	1998-06-01	1998	1	Demonstrations	Riots	Violent demonstration	Rioters (Zimbabwe)	Students (Zimbabwe)	Rioters				Rioters only		716	Southern Africa	Zimbabwe	Harare	Harare Urban		Harare	-17.8277	31.0534	1	Reuters	International	Students protesting against Mugabes rule smash shop windows	0		1618597779
ZIM85	1998-06-10	1998	1	Demonstrations	Riots	Violent demonstration	Rioters (Zimbabwe)	Students (Zimbabwe)	Rioters				Rioters only		716	Southern Africa	Zimbabwe	Bulawayo	Bulawayo		Bulawayo	-20.15	28.58	1	All Africa	International	Students riot
ZIM87	1998-06-12	1998	1	Political violence; Demonstrations	Protests	Excessive force against protesters	Police Forces of Zimbabwe (1987-2017)		State forces	Protesters (Zimbabwe)	Students (Zimbabwe)	Protesters	State forces-Protesters	Civilian targeting	716	Southern Africa	Zimbabwe	Manicaland	Mutare Urban		Mutare	-18.9707	32.6709	1	Local Source; All Africa	International	Students protest governmental loans
ZIM88	1998-08-20	1998	1	Political violence; Demonstrations	Protests	Excessive force against protesters	Protesters (Zimbabwe)	Refugees/IDPs (Democratic Republic of Congo)	Protesters	Police Forces of Zimbabwe (1987-2017)		State forces	State forces-Protesters	Civilian targeting	716	Southern Africa	Zimbabwe	Harare	Harare Urban		Harare	-17.8277	31.0534	1	All Africa	International	Refugees protest outside UNHCR offices
ZIM90	1998-10-23	1998	1	Demonstrations	Riots	Violent demonstration	Rioters (Zimbabwe)		Rioters				Rioters only		716	Southern Africa	Zimbabwe	Harare	Harare Urban		Harare	-17.8277	31.0534	1	Dow Jones International	International	Municipal workers protest late payment of wages	0		1618597779
ZIM91	1998-10-24	1998	1	Demonstrations	Riots	Violent demonstration	Rioters (Zimbabwe)		Rioters				Rioters only		716	Southern Africa	Zimbabwe	Harare	Harare Urban		Harare	-17.8277	31.0534	1	Reuters	International	Municipal workers protest late payment of wages	0		1618597779
ZIM92	1998-10-25	1998	1	Demonstrations	Riots	Violent demonstration	Rioters (Zimbabwe)		Rioters				Rioters only		716	Southern Africa	Zimbabwe	Harare	Harare Urban		Harare	-17.8277	31.0534	1	Reuters	International	Municipal workers protest late payment of wages	0		1618597779
ZIM93	1998-10-26	1998	1	Demonstrations	Riots	Violent demonstration	Rioters (Zimbabwe)		Rioters				Rioters only		716	Southern Africa	Zimbabwe	Harare	Harare Urban		Harare	-17.8277	31.0534	1	Reuters	International	Municipal workers protest late payment of wages	0		1618597779
ZIM94	1998-10-31	1998	1	Demonstrations	Protests	Peaceful protest	Protesters (Zimbabwe)		Protesters				Protesters only		716	Southern Africa	Zimbabwe	Harare	Harare Urban		Harare	-17.8277	31.0534	1	Reuters	International	Small protest
ZIM95	1998-11-04	1998	1	Demonstrations	Riots	Violent demonstration	Rioters (Zimbabwe)		Rioters				Rioters only		716	Southern Africa	Zimbabwe	Harare	Chitungwiza		Chitungwiza	-18.0127	31.0756	1	All Africa	International	Riots in response to increased fuel prices	0		1618597779
ZIM97	1998-11-04	1998	1	Demonstrations	Protests	Peaceful protest	Protesters (Zimbabwe)		Protesters				Protesters only		716	Southern Africa	Zimbabwe	Midlands	Gweru Urban		Gweru	-19.45	29.82	1	All Africa	International	Protests in response to increased fuel prices	0		1618597779
ZIM96	1998-11-04	1998	1	Demonstrations	Riots	Violent demonstration	Rioters (Zimbabwe)		Rioters				Rioters only		716	Southern Africa	Zimbabwe	Harare	Harare Urban		Harare	-17.8277	31.0534	1	All Africa	International	Riots in response to increased fuel prices	0		1618597779
ZIM98	1998-11-09	1998	1	Political violence	Violence against civilians	Attack	Unidentified Armed Group (Zimbabwe)		Political militia	Civilians (Zimbabwe)		Civilians	Political militia-Civilians	Civilian targeting	716	Southern Africa	Zimbabwe	Harare	Harare Urban		Harare	-17.8277	31.0534	1	Times (South Africa)	International	Couple stabbed
ZIM99	1998-11-10	1998	1	Demonstrations	Protests	Peaceful protest	Protesters (Zimbabwe)	ZNLWVA: Zimbabwe National Liberation War Veterans Association	Protesters				Protesters only		716	Southern Africa	Zimbabwe	Bulawayo	Bulawayo		Bulawayo	-20.15	28.58	1	All Africa	International	War vets protest state intimidation of Hunzvi	0		1618597779
ZIM100	1998-11-11	1998	1	Demonstrations	Riots	Violent demonstration	Rioters (Zimbabwe)		Rioters	Police Forces of Zimbabwe (1987-2017)		State forces	State forces-Rioters		716	Southern Africa	Zimbabwe	Manicaland	Mutare Urban		Mutare	-18.9707	32.6709	1	Reuters	International	Police open fire on rioters involved in protesting fuel price hikes	1		1618597779
ZIM101	1998-11-11	1998	1	Political violence	Violence against civilians	Attack	Police Forces of Zimbabwe (1987-2017)		State forces	Civilians (Zimbabwe)		Civilians	State forces-Civilians	Civilian targeting	716	Southern Africa	Zimbabwe	Manicaland	Mutare Urban		Mutare	-18.9707	32.6709	1	Reuters	International	Police open fire on rioters involved in protesting fuel price hikes	1		1618597779
ZIM102	1998-11-11	1998	1	Political violence	Violence against civilians	Attack	Unidentified Armed Group (Zimbabwe)		Political militia	Civilians (Zimbabwe)		Civilians	Political militia-Civilians	Civilian targeting	716	Southern Africa	Zimbabwe	Mashonaland East	Marondera Urban		Marondera	-18.1833	31.55	1	Reuters	International	Farmer in centre of race row killed
ZIM103	1998-11-11	1998	1	Demonstrations	Protests	Peaceful protest	Protesters (Zimbabwe)		Protesters				Protesters only		716	Southern Africa	Zimbabwe	Bulawayo	Bulawayo		Bulawayo	-20.15	28.58	1	All Africa	International	Stayaway in protest against fuel price hikes	0		1618597779
ZIM109	1998-11-18	1998	1	Demonstrations	Protests	Peaceful protest	Protesters (Zimbabwe)	ZCTU: Zimbabwe Congress of Trade Unions	Protesters				Protesters only		716	Southern Africa	Zimbabwe	Manicaland	Mutare Urban		Mutare	-18.9707	32.6709	1	Dow Jones International	International	National stay away in protest at fuel increases	0		1618597779
ZIM106	1998-11-18	1998	1	Demonstrations	Protests	Peaceful protest	Protesters (Zimbabwe)	ZCTU: Zimbabwe Congress of Trade Unions	Protesters				Protesters only		716	Southern Africa	Zimbabwe	Harare	Harare Urban		Harare	-17.8277	31.0534	1	Dow Jones International	International	National stay away in protest at fuel increases	0		1618597779
ZIM105	1998-11-18	1998	1	Demonstrations	Protests	Peaceful protest	Protesters (Zimbabwe)	ZCTU: Zimbabwe Congress of Trade Unions	Protesters				Protesters only		716	Southern Africa	Zimbabwe	Midlands	Gweru Urban		Gweru	-19.45	29.82	1	Dow Jones International	International	National stay away in protest at fuel increases	0		1618597779
ZIM108	1998-11-18	1998	1	Demonstrations	Protests	Peaceful protest	Protesters (Zimbabwe)	ZCTU: Zimbabwe Congress of Trade Unions	Protesters				Protesters only		716	Southern Africa	Zimbabwe	Masvingo	Masvingo Urban		Masvingo	-20.0833	30.8333	1	Dow Jones International	International	National stay away in protest at fuel increases	0		1618597779
ZIM104	1998-11-18	1998	1	Demonstrations	Protests	Peaceful protest	Protesters (Zimbabwe)	ZCTU: Zimbabwe Congress of Trade Unions	Protesters				Protesters only		716	Southern Africa	Zimbabwe	Bulawayo	Bulawayo		Bulawayo	-20.15	28.58	1	Dow Jones International	International	National stay away in protest at fuel increases	0		1618597779
ZIM107	1998-11-18	1998	1	Demonstrations	Protests	Peaceful protest	Protesters (Zimbabwe)	ZCTU: Zimbabwe Congress of Trade Unions	Protesters				Protesters only		716	Southern Africa	Zimbabwe	Midlands	Kwekwe Urban		Kwekwe	-18.9166	29.8167	1	Dow Jones International	International	National stay away in protest at fuel increases	0		1618597779
ZIM110	1998-11-30	1998	1	Demonstrations	Protests	Peaceful protest	Protesters (Zimbabwe)	ZNLWVA: Zimbabwe National Liberation War Veterans Association	Protesters				Protesters only		716	Southern Africa	Zimbabwe	Harare	Harare Urban		Harare	-17.8277	31.0534	1	Reuters	International	War vets protest incarceration of Chenjerai Hunzvi	0		1618597779
ZIM112	1999-01-01	1999	1	Political violence	Violence against civilians	Attack	Police Forces of Zimbabwe (1987-2017)		State forces	Civilians (Zimbabwe)		Civilians	State forces-Civilians	Civilian targeting	716	Southern Africa	Zimbabwe	Manicaland	Nyanga		Nyanga	-18.2166	32.75	1	Zimbabwe Human Rights NGO Forum	Other	15 people injured when police let dogs on them	0		1618597779
ZIM113	1999-01-12	1999	1	Political violence	Violence against civilians	Attack	Police Forces of Zimbabwe (1987-2017)	Military Forces of Zimbabwe (1987-2017)	State forces	Civilians (Zimbabwe)		Civilians	State forces-Civilians	Civilian targeting	716	Southern Africa	Zimbabwe	Harare	Harare Urban		Harare	-17.8277	31.0534	1	Amnesty International	Other	Standard editor Mark Chavunduka arrested
ZIM114	1999-01-19	1999	1	Political violence	Violence against civilians	Attack	Police Forces of Zimbabwe (1987-2017)	Military Forces of Zimbabwe (1987-2017)	State forces	Civilians (Zimbabwe)	Journalists (Zimbabwe)	Civilians	State forces-Civilians	Civilian targeting	716	Southern Africa	Zimbabwe	Harare	Harare Urban		Harare	-17.8277	31.0534	1	Amnesty International	Other	Standard reporter Ray Choto arrested
ZIM115	1999-01-25	1999	1	Political violence	Violence against civilians	Attack	Military Forces of Zimbabwe (1987-2017) Central Intelligence Organization		State forces	Civilians (Zimbabwe)		Civilians	State forces-Civilians	Civilian targeting	716	Southern Africa	Zimbabwe	Mashonaland Central	Mount Darwin		Mt. Darwin	-16.7833	31.5833	1	All Africa	International	member of the Democratic Partys national executive committee assaulted
ZIM116	1999-01-26	1999	1	Demonstrations	Protests	Peaceful protest	Protesters (Zimbabwe)		Protesters				Protesters only		716	Southern Africa	Zimbabwe	Harare	Harare Urban		Harare	-17.8277	31.0534	1	All Africa	International	Protesters
ZIM117	1999-01-26	1999	1	Political violence	Violence against civilians	Attack	Police Forces of Zimbabwe (1987-2017)		State forces	Civilians (Zimbabwe)		Civilians	State forces-Civilians	Civilian targeting	716	Southern Africa	Zimbabwe	Harare	Harare Urban		Harare	-17.8277	31.0534	1	Guardian (United Kingdom)	International	Police use teargas
ZIM118	1999-01-28	1999	1	Political violence	Violence against civilians	Attack	Police Forces of Zimbabwe (1987-2017)		State forces	Civilians (Zimbabwe)		Civilians	State forces-Civilians	Civilian targeting	716	Southern Africa	Zimbabwe	Bulawayo	Bulawayo		Bulawayo	-20.15	28.58	1	All Africa	International	Police kill civilian in what is described as obvious abuse of power
ZIM120	1999-02-10	1999	1	Demonstrations	Riots	Violent demonstration	Rioters (Zimbabwe)	Students (Zimbabwe)	Rioters	Police Forces of Zimbabwe (1987-2017)		State forces	State forces-Rioters		716	Southern Africa	Zimbabwe	Harare	Harare Urban		Harare	-17.8277	31.0534	1	The New Humanitarian	International	Students clash with police during protests against erosion of rule of law	0		1636413269
ZIM123	1999-03-02	1999	1	Political violence; Demonstrations	Protests	Excessive force against protesters	Police Forces of Zimbabwe (1987-2017)		State forces	Protesters (Zimbabwe)	Students (Zimbabwe)	Protesters	State forces-Protesters	Civilian targeting	716	Southern Africa	Zimbabwe	Bulawayo	Bulawayo		Bulawayo	-20.15	28.58	1	All Africa	International	Police open fire on student demonstrations against increasing lawlessness
ZIM122	1999-03-02	1999	1	Demonstrations	Protests	Peaceful protest	Protesters (Zimbabwe)	Students (Zimbabwe)	Protesters				Protesters only		716	Southern Africa	Zimbabwe	Manicaland	Mutare Urban		Mutare	-18.9707	32.6709	1	All Africa	International	Students protest increasing lawlessness	0		1618597779
ZIM124	1999-03-02	1999	1	Political violence; Demonstrations	Protests	Excessive force against protesters	Police Forces of Zimbabwe (1987-2017)		State forces	Protesters (Zimbabwe)	Students (Zimbabwe)	Protesters	State forces-Protesters	Civilian targeting	716	Southern Africa	Zimbabwe	Manicaland	Mutare Urban		Mutare	-18.9707	32.6709	1	All Africa	International	Students protest increasing lawlessness
ZIM126	1999-03-07	1999	1	Political violence	Violence against civilians	Attack	Police Forces of Zimbabwe (1987-2017)		State forces	Civilians (Zimbabwe)	Students (Zimbabwe); Teachers (Zimbabwe)	Civilians	State forces-Civilians	Civilian targeting	716	Southern Africa	Zimbabwe	Harare	Harare Urban		Harare	-17.8277	31.0534	1	Zimbabwe Human Rights NGO Forum	Other	Student teacher killed by police in an off campus demonstration. No location or extra information included	1		1618597779
ZIM125	1999-03-07	1999	1	Political violence	Violence against civilians	Attack	Police Forces of Zimbabwe (1987-2017)		State forces	Civilians (Zimbabwe)		Civilians	State forces-Civilians	Civilian targeting	716	Southern Africa	Zimbabwe	Bulawayo	Bulawayo		Bulawayo	-20.15	28.58	1	Zimbabwe Human Rights NGO Forum	Other	Police shoot and kill 20 year old man
ZIM127	1999-03-26	1999	1	Political violence	Violence against civilians	Attack	Police Forces of Zimbabwe (1987-2017)		State forces	Civilians (Zimbabwe)		Civilians	State forces-Civilians	Civilian targeting	716	Southern Africa	Zimbabwe	Manicaland	Mutare Urban		Mutare	-18.9707	32.6709	1	Zimbabwe Human Rights NGO Forum	Other	Man died after police let dogs on his house in attempt to question him in relation to theft	1		1618597779
ZIM128	1999-04-01	1999	1	Demonstrations	Protests	Peaceful protest	Protesters (Zimbabwe)		Protesters				Protesters only		716	Southern Africa	Zimbabwe	Harare	Harare Urban		Harare	-17.8277	31.0534	1	All Africa	International	Yugoslav people protest NATO bombings outside US embassy	0		1618597779
ZIM129	1999-04-07	1999	1	Political violence	Violence against civilians	Attack	Police Forces of Zimbabwe (1987-2017)		State forces	Civilians (Zimbabwe)	Women (Zimbabwe)	Civilians	State forces-Civilians	Civilian targeting	716	Southern Africa	Zimbabwe	Harare	Harare Urban		Harare	-17.8277	31.0534	1	Zimbabwe Human Rights NGO Forum	Other	Location not disclosed. Woman killed by police bullet. Police maintain bullet ricoched and was not meant for her
ZIM130	1999-04-14	1999	1	Demonstrations	Riots	Violent demonstration	Rioters (Zimbabwe)	Students (Zimbabwe)	Rioters	Police Forces of Zimbabwe (1987-2017)		State forces	State forces-Rioters		716	Southern Africa	Zimbabwe	Harare	Harare Urban		Harare	-17.8277	31.0534	1	Reuters	International	Students protest
ZIM131	1999-04-17	1999	1	Demonstrations	Protests	Peaceful protest	Protesters (Zimbabwe)		Protesters				Protesters only		716	Southern Africa	Zimbabwe	Harare	Harare Urban		Harare	-17.8277	31.0534	1	All Africa	International	Yugoslav people protest NATO bombings outside US embassy	0		1618597779
ZIM132	1999-04-18	1999	1	Demonstrations	Riots	Violent demonstration	Rioters (Zimbabwe)		Rioters	Police Forces of Zimbabwe (1987-2017)		State forces	State forces-Rioters		716	Southern Africa	Zimbabwe	Harare	Harare Urban		Harare	-17.8277	31.0534	1	Globe and Mail (Canada)	International	Youths rioted after not being allowed into stadium for Independence Day celebrations. Police fired tear gas to disperse them	0		1668453787
ZIM137	1999-06-01	1999	1	Strategic developments	Strategic developments	Change to group/activity	Military Forces of Zimbabwe (1987-2017)		State forces				State forces only		716	Southern Africa	Zimbabwe	Harare	Harare Urban		Harare	-17.8277	31.0534	1	Africa Research Bulletin	Other	Movement of forces: Troop strength risen by around 4
ZIM136	1999-06-01	1999	1	Political violence	Battles	Armed clash	Unidentified Armed Group (Democratic Republic of Congo)		Political militia	Military Forces of Zimbabwe (1987-2017)		State forces	State forces-Political militia		716	Southern Africa	Zimbabwe	Harare	Harare Urban		Harare	-17.8277	31.0534	1	Africa Research Bulletin	Other	On 1 June 1999
ZIM139	1999-06-14	1999	1	Demonstrations	Protests	Peaceful protest	Protesters (Zimbabwe)		Protesters				Protesters only		716	Southern Africa	Zimbabwe	Harare	Harare Urban		Harare	-17.8277	31.0534	1	The New Humanitarian	International	Strike:Civil servants strike
ZIM140	1999-06-15	1999	1	Demonstrations	Protests	Peaceful protest	Protesters (Zimbabwe)		Protesters				Protesters only		716	Southern Africa	Zimbabwe	Harare	Harare Urban		Harare	-17.8277	31.0534	1	The New Humanitarian	International	Strike:Civil servants strike
ZIM141	1999-06-16	1999	1	Demonstrations	Protests	Peaceful protest	Protesters (Zimbabwe)		Protesters				Protesters only		716	Southern Africa	Zimbabwe	Harare	Harare Urban		Harare	-17.8277	31.0534	1	The New Humanitarian	International	Strike:Civil servants strike
ZIM143	1999-06-23	1999	1	Demonstrations	Protests	Peaceful protest	Protesters (Zimbabwe)		Protesters				Protesters only		716	Southern Africa	Zimbabwe	Midlands	Gweru Urban		Gweru	-19.45	29.82	1	All Africa	International	Protest by civil servants
ZIM144	1999-06-23	1999	1	Demonstrations	Protests	Peaceful protest	Protesters (Zimbabwe)		Protesters				Protesters only		716	Southern Africa	Zimbabwe	Harare	Harare Urban		Harare	-17.8277	31.0534	1	All Africa	International	Protest by civil servants
ZIM145	1999-07-02	1999	1	Political violence	Violence against civilians	Attack	Police Forces of Zimbabwe (1987-2017)		State forces	Civilians (Zimbabwe)		Civilians	State forces-Civilians	Civilian targeting	716	Southern Africa	Zimbabwe	Bulawayo	Bulawayo		Bulawayo	-20.15	28.58	1	Zimbabwe Human Rights NGO Forum	Other	Daily News claim another extra-judicial killing
ZIM146	1999-07-09	1999	1	Demonstrations	Riots	Violent demonstration	ZANU-PF: Zimbabwe African National Union-Patriotic Front		Political militia	Rioters (Zimbabwe)		Rioters	Political militia-Rioters		716	Southern Africa	Zimbabwe	Mashonaland West	Makonde		Mhangura	-16.8939	30.1683	1	All Africa	International	Zanu-PF women's wing disrupt UP meeting
ZIM147	1999-07-10	1999	1	Demonstrations	Protests	Peaceful protest	Protesters (Zimbabwe)		Protesters				Protesters only		716	Southern Africa	Zimbabwe	Harare	Harare Urban		Harare	-17.8277	31.0534	1	The New Humanitarian	International	Strike:Municipal workerss strike	0		1636413269
ZIM148	1999-07-11	1999	1	Demonstrations	Protests	Peaceful protest	Protesters (Zimbabwe)		Protesters				Protesters only		716	Southern Africa	Zimbabwe	Harare	Harare Urban		Harare	-17.8277	31.0534	1	The New Humanitarian	International	Strike:Municipal workerss strike	0		1636413269
ZIM151	1999-07-12	1999	1	Political violence	Violence against civilians	Attack	Police Forces of Zimbabwe (1987-2017)		State forces	Civilians (Zimbabwe)		Civilians	State forces-Civilians	Civilian targeting	716	Southern Africa	Zimbabwe	Harare	Harare Urban		Harare	-17.8277	31.0534	1	All Africa	International	War veterans protest governments refusal for increases in reparations
ZIM150	1999-07-12	1999	1	Demonstrations	Protests	Peaceful protest	Protesters (Zimbabwe)	ZNLWVA: Zimbabwe National Liberation War Veterans Association	Protesters				Protesters only		716	Southern Africa	Zimbabwe	Harare	Harare Urban		Harare	-17.8277	31.0534	1	All Africa	International	War veterans protest governments refusal for increases in reparations
ZIM149	1999-07-12	1999	1	Demonstrations	Riots	Violent demonstration	Rioters (Zimbabwe)	ZNLWVA: Zimbabwe National Liberation War Veterans Association	Rioters	Police Forces of Zimbabwe (1987-2017)		State forces	State forces-Rioters		716	Southern Africa	Zimbabwe	Harare	Harare Urban		Harare	-17.8277	31.0534	1	Reuters	International	War veterans protest governments refusal for increases in reparations
ZIM152	1999-07-12	1999	1	Demonstrations	Protests	Peaceful protest	Protesters (Zimbabwe)		Protesters				Protesters only		716	Southern Africa	Zimbabwe	Harare	Harare Urban		Harare	-17.8277	31.0534	1	The New Humanitarian	International	Strike:Municipal workerss strike	0		1636413269
ZIM154	1999-07-13	1999	1	Demonstrations	Protests	Peaceful protest	Protesters (Zimbabwe)		Protesters				Protesters only		716	Southern Africa	Zimbabwe	Harare	Harare Urban		Harare	-17.8277	31.0534	1	The New Humanitarian	International	Strike:Municipal workerss strike	0		1636413269
ZIM153	1999-07-13	1999	1	Demonstrations	Protests	Peaceful protest	Protesters (Zimbabwe)	ZNLWVA: Zimbabwe National Liberation War Veterans Association	Protesters				Protesters only		716	Southern Africa	Zimbabwe	Harare	Harare Urban		Harare	-17.8277	31.0534	1	The New Humanitarian	International	War vets protest
ZIM155	1999-07-18	1999	1	Political violence	Violence against civilians	Attack	Police Forces of Zimbabwe (1987-2017)		State forces	Civilians (Mozambique)		Civilians	State forces-Civilians	Civilian targeting	716	Southern Africa	Zimbabwe	Harare	Harare Urban		Harare	-17.8277	31.0534	1	All Africa; Local Source	International	600 Mozambicans forcibly repatriated	0		1618597779
ZIM157	1999-08-20	1999	1	Political violence	Violence against civilians	Sexual violence	Police Forces of Zimbabwe (1987-2017)		State forces	Civilians (Zimbabwe)		Civilians	State forces-Civilians	Civilian targeting	716	Southern Africa	Zimbabwe	Manicaland	Buhera		Birchenough Bridge	-19.9333	32.3167	1	Zimbabwe Human Rights NGO Forum	Other	Attempted rape
ZIM158	1999-09-11	1999	1	Strategic developments	Strategic developments	Other	MDC: Movement for Democratic Change		Political militia				Political militia only		716	Southern Africa	Zimbabwe	Harare	Harare Urban		Harare	-17.8277	31.0534	1	Africa Research Bulletin	Other	Non-violent activity: MDC launched as a political party	0		1618597779
ZIM159	1999-10-02	1999	1	Demonstrations	Riots	Violent demonstration	Rioters (Zimbabwe)		Rioters				Rioters only		716	Southern Africa	Zimbabwe	Bulawayo	Bulawayo		Umguza	-20.0833	28.5833	1	Xinhua	International	300 Nyamandlovu villagers invaded the Imvana farm in protest at government failures to resettle them by the end of August as promised	0		1618597779
ZIM160	1999-10-22	1999	1	Political violence	Violence against civilians	Attack	Police Forces of Zimbabwe (1987-2017)		State forces	Civilians (Zimbabwe)		Civilians	State forces-Civilians	Civilian targeting	716	Southern Africa	Zimbabwe	Harare	Harare Urban		Sunningdale	-17.8678	31.0561	1	Zimbabwe Human Rights NGO Forum	Other	Man beaten
ZIM161	1999-10-26	1999	1	Demonstrations	Riots	Violent demonstration	Rioters (Zimbabwe)	Students (Zimbabwe)	Rioters	Police Forces of Zimbabwe (1987-2017)		State forces	State forces-Rioters		716	Southern Africa	Zimbabwe	Harare	Harare Urban		Harare	-17.8277	31.0534	1	Reuters	International	Students protesting grants attacked by teargas by police	0		1618597779
ZIM163	1999-12-11	1999	1	Demonstrations	Protests	Peaceful protest	Protesters (Zimbabwe)	MDC: Movement for Democratic Change	Protesters				Protesters only		716	Southern Africa	Zimbabwe	Harare	Harare Urban		Harare	-17.8277	31.0534	1	The New Humanitarian	International	Protests against governments failure to acknowledge civic groups input into constitutional amendment process	0		1636413269
ZIM164	1999-12-11	1999	1	Political violence; Demonstrations	Protests	Excessive force against protesters	Police Forces of Zimbabwe (1987-2017)		State forces	Protesters (Zimbabwe)		Protesters	State forces-Protesters	Civilian targeting	716	Southern Africa	Zimbabwe	Harare	Harare Urban		Harare	-17.8277	31.0534	1	The New Humanitarian	International	Police fire teargas at protests against governments failure to acknowledge civic groups input into constitutional amendment process	0		1636413269
ZIM165	2000-01-01	2000	1	Political violence	Violence against civilians	Attack	Police Forces of Zimbabwe (1987-2017)		State forces	Civilians (Zimbabwe)	Students (Zimbabwe)	Civilians	State forces-Civilians	Civilian targeting	716	Southern Africa	Zimbabwe	Harare	Harare Urban		Mbare	-17.8581	31.0372	1	Zimbabwe Human Rights NGO Forum	Other	Police fire teargas into school. Date not specified	0		1618597779
ZIM167	2000-01-11	2000	1	Demonstrations	Protests	Peaceful protest	Protesters (Zimbabwe)	ZNLWVA: Zimbabwe National Liberation War Veterans Association	Protesters				Protesters only		716	Southern Africa	Zimbabwe	Harare	Harare Urban		Harare	-17.8277	31.0534	1	Zimbabwe Human Rights NGO Forum	Other	War vets gather to claim that constitution should allow government to acquire land without paying compensation	0		1618597779
ZIM166	2000-01-11	2000	1	Political violence	Violence against civilians	Attack	ZANU-PF: Zimbabwe African National Union-Patriotic Front		Political militia	Civilians (Zimbabwe)		Civilians	Political militia-Civilians	Civilian targeting	716	Southern Africa	Zimbabwe	Midlands	Kwekwe Urban		Kwekwe	-18.9166	29.8167	1	Amnesty International	Other	Systematic burning of MDC supporters houses	0		1618597779
ZIM168	2000-02-01	2000	1	Political violence	Violence against civilians	Attack	ZANU-PF: Zimbabwe African National Union-Patriotic Front		Political militia	Civilians (Zimbabwe)		Civilians	Political militia-Civilians	Civilian targeting	716	Southern Africa	Zimbabwe	Harare	Harare Urban		Mufakose	-17.8663	30.9272	1	Zimbabwe Human Rights NGO Forum	Other	Zanu-PF candidate Sabina Thembani implicated in series of violent assaults against MDC supporters
ZIM169	2000-02-06	2000	1	Political violence	Violence against civilians	Attack	MDC: Movement for Democratic Change		Political militia	Civilians (Zimbabwe)		Civilians	Political militia-Civilians	Civilian targeting	716	Southern Africa	Zimbabwe	Harare	Harare Urban		Harare	-17.8277	31.0534	1	Zimbabwe Human Rights NGO Forum	Other	On 6 February 2000
ZIM170	2000-02-20	2000	1	Political violence	Violence against civilians	Attack	ZANU-PF: Zimbabwe African National Union-Patriotic Front		Political militia	Civilians (Zimbabwe)		Civilians	Political militia-Civilians	Civilian targeting	716	Southern Africa	Zimbabwe	Mashonaland Central	Mazowe		Chiweshe Tribal Trust Land	-17.0833	31.0833	1	Zimbabwe Human Rights NGO Forum	Other	Minister of Information and Zanu (PF) candidate
ZIM171	2000-02-22	2000	1	Political violence	Violence against civilians	Attack	ZANU-PF: Zimbabwe African National Union-Patriotic Front		Political militia	Civilians (Zimbabwe)		Civilians	Political militia-Civilians	Civilian targeting	716	Southern Africa	Zimbabwe	Midlands	Kwekwe Urban		Kwekwe	-18.9166	29.8167	1	Amnesty International	Other	MDC offices burned
ZIM172	2000-03-01	2000	1	Political violence	Violence against civilians	Attack	ZANU-PF: Zimbabwe African National Union-Patriotic Front		Political militia	Civilians (Zimbabwe)		Civilians	Political militia-Civilians	Civilian targeting	716	Southern Africa	Zimbabwe	Midlands	Redcliff		Redcliff	-19.0333	29.7833	1	Amnesty International	Other	24 people (estimate) beaten by Zanu-PF militia roadblock	0		1618597779
ZIM173	2000-03-01	2000	1	Political violence	Violence against civilians	Attack	ZANU-PF: Zimbabwe African National Union-Patriotic Front		Political militia	Civilians (Zimbabwe)		Civilians	Political militia-Civilians	Civilian targeting	716	Southern Africa	Zimbabwe	Harare	Harare Urban		Harare	-17.8277	31.0534	1	Zimbabwe Human Rights NGO Forum	Other	On 1 March 2000
ZIM174	2000-03-06	2000	1	Political violence	Violence against civilians	Attack	ZNLWVA: Zimbabwe National Liberation War Veterans Association	ZANU-PF: Zimbabwe African National Union-Patriotic Front	Political militia	Civilians (Zimbabwe)		Civilians	Political militia-Civilians	Civilian targeting	716	Southern Africa	Zimbabwe	Midlands	Mberengwa		Mberengwa	-20.4833	29.9167	1	Zimbabwe Human Rights NGO Forum	Other	On 6 March 2000
ZIM175	2000-03-11	2000	1	Political violence	Violence against civilians	Attack	MDC: Movement for Democratic Change		Political militia	Civilians (Zimbabwe)		Civilians	Political militia-Civilians	Civilian targeting	716	Southern Africa	Zimbabwe	Harare	Harare Urban		Harare	-17.8277	31.0534	1	Zimbabwe Human Rights NGO Forum	Other	On 11 March 2000
ZIM176	2000-03-13	2000	1	Political violence	Violence against civilians	Attack	ZANU-PF: Zimbabwe African National Union-Patriotic Front		Political militia	Civilians (Zimbabwe)		Civilians	Political militia-Civilians	Civilian targeting	716	Southern Africa	Zimbabwe	Matabeleland North	Tsholotsho		Mbizo	-19.2166	27.5167	1	Amnesty International	Other	Funny Mahuni killed
ZIM177	2000-03-16	2000	1	Political violence	Violence against civilians	Attack	ZANU-PF: Zimbabwe African National Union-Patriotic Front		Political militia	Civilians (Zimbabwe)		Civilians	Political militia-Civilians	Civilian targeting	716	Southern Africa	Zimbabwe	Mashonaland West	Kariba Urban		Kariba	-16.5166	28.8	1	Zimbabwe Human Rights NGO Forum	Other	On 16 March 2000
ZIM178	2000-03-18	2000	1	Political violence	Violence against civilians	Attack	Unidentified Armed Group (Zimbabwe)		Political militia	Civilians (Zimbabwe)		Civilians	Political militia-Civilians	Civilian targeting	716	Southern Africa	Zimbabwe	Bulawayo	Bulawayo		Bulawayo	-20.15	28.58	1	Zimbabwe Human Rights NGO Forum	Other	MDC rally broken up by armed men	0		1618597779
ZIM179	2000-03-21	2000	1	Political violence	Violence against civilians	Attack	Unidentified Armed Group (Zimbabwe)		Political militia	Civilians (Zimbabwe)		Civilians	Political militia-Civilians	Civilian targeting	716	Southern Africa	Zimbabwe	Bulawayo	Bulawayo		Bulawayo	-20.15	28.58	1	Zimbabwe Human Rights NGO Forum	Other	District chairman attacked and left for dead. Perpetrators probably Zanu-PF but not specified	0		1618597779
ZIM181	2000-03-25	2000	1	Political violence	Violence against civilians	Attack	MDC: Movement for Democratic Change		Political militia	Civilians (Zimbabwe)		Civilians	Political militia-Civilians	Civilian targeting	716	Southern Africa	Zimbabwe	Mashonaland East	Chikomba		Chivhu	-19.0211	30.8922	1	Zimbabwe Human Rights NGO Forum	Other	MDC district chairman
ZIM180	2000-03-25	2000	1	Demonstrations	Riots	Violent demonstration	Rioters (Zimbabwe)	MDC: Movement for Democratic Change	Rioters	Rioters (Zimbabwe)	ZANU-PF: Zimbabwe African National Union-Patriotic Front	Rioters	Rioters-Rioters		716	Southern Africa	Zimbabwe	Harare	Harare Urban		Harare	-17.8277	31.0534	1	Zimbabwe Human Rights NGO Forum	Other	On 25 March 2000
ZIM182	2000-03-25	2000	1	Political violence	Violence against civilians	Attack	ZANU-PF: Zimbabwe African National Union-Patriotic Front	ZNLWVA: Zimbabwe National Liberation War Veterans Association	Political militia	Civilians (Zimbabwe)		Civilians	Political militia-Civilians	Civilian targeting	716	Southern Africa	Zimbabwe	Mashonaland Central	Mount Darwin		Mt. Darwin	-16.7833	31.5833	1	Zimbabwe Human Rights NGO Forum	Other	On 25 March 2000
ZIM183	2000-03-26	2000	1	Political violence	Violence against civilians	Attack	ZANU-PF: Zimbabwe African National Union-Patriotic Front		Political militia	Civilians (Zimbabwe)		Civilians	Political militia-Civilians	Civilian targeting	716	Southern Africa	Zimbabwe	Mashonaland Central	Bindura Urban		Bindura	-17.2964	31.3297	1	Zimbabwe Human Rights NGO Forum	Other	Edwin Gomo killed by stone thrown by Zanu-PF supporters after Border Gezis speech	1		1618597779
ZIM184	2000-03-28	2000	1	Political violence	Battles	Armed clash	ZANU-PF: Zimbabwe African National Union-Patriotic Front	ZNLWVA: Zimbabwe National Liberation War Veterans Association	Political militia	MDC: Movement for Democratic Change		Political militia	Political militia-Political militia		716	Southern Africa	Zimbabwe	Midlands	Kwekwe Urban		Kwekwe	-18.9166	29.8167	1	Amnesty International	Other	Back and forth attacks between MDC and Zanu-PF militia	0		1618597779
ZIM186	2000-03-29	2000	1	Political violence	Violence against civilians	Attack	ZNLWVA: Zimbabwe National Liberation War Veterans Association		Political militia	Civilians (Zimbabwe)		Civilians	Political militia-Civilians	Civilian targeting	716	Southern Africa	Zimbabwe	Matabeleland North	Bubi		Inyati	-19.6756	28.8469	2	Zimbabwe Human Rights NGO Forum	Other	Hunzvi and supporters televised intimidation of farmer	0		1618597779
ZIM185	2000-03-29	2000	1	Political violence	Violence against civilians	Attack	ZNLWVA: Zimbabwe National Liberation War Veterans Association		Political militia	Civilians (Zimbabwe)		Civilians	Political militia-Civilians	Civilian targeting	716	Southern Africa	Zimbabwe	Matabeleland North	Bubi		Inyati	-19.6756	28.8469	2	Zimbabwe Human Rights NGO Forum	Other	Hunzvi and supporters beat up owner of local bottle store	0		1618597779
ZIM187	2000-03-30	2000	1	Political violence	Explosions/Remote violence	Remote explosive/landmine/IED	ZANU-PF: Zimbabwe African National Union-Patriotic Front		Political militia	Civilians (Zimbabwe)		Civilians	Political militia-Civilians	Civilian targeting	716	Southern Africa	Zimbabwe	Mashonaland Central	Bindura Urban		Bindura	-17.2964	31.3297	1	Zimbabwe Human Rights NGO Forum	Other	MDC regional offices bombed
ZIM188	2000-03-30	2000	1	Political violence	Violence against civilians	Attack	MDC: Movement for Democratic Change		Political militia	Civilians (Zimbabwe)		Civilians	Political militia-Civilians	Civilian targeting	716	Southern Africa	Zimbabwe	Mashonaland West	Zvimba		Porta	-17.85	30.7667	1	Zimbabwe Human Rights NGO Forum	Other	On 30 March 2000
ZIM189	2000-03-31	2000	1	Political violence	Violence against civilians	Attack	ZANU-PF: Zimbabwe African National Union-Patriotic Front		Political militia	Civilians (Zimbabwe)		Civilians	Political militia-Civilians	Civilian targeting	716	Southern Africa	Zimbabwe	Mashonaland Central	Bindura Urban		Bindura	-17.2964	31.3297	1	Zimbabwe Human Rights NGO Forum	Other	Bus with MDC stickers set alight	0		1618597779
ZIM193	2000-04-01	2000	1	Political violence	Violence against civilians	Attack	ZNLWVA: Zimbabwe National Liberation War Veterans Association		Political militia	Civilians (Zimbabwe)		Civilians	Political militia-Civilians	Civilian targeting	716	Southern Africa	Zimbabwe	Harare	Harare Urban		Harare	-17.8277	31.0534	1	Zimbabwe Human Rights NGO Forum	Other	NCA march attacked	0		1618597779
ZIM190	2000-04-01	2000	1	Political violence	Violence against civilians	Attack	ZANU-PF: Zimbabwe African National Union-Patriotic Front	ZNLWVA: Zimbabwe National Liberation War Veterans Association	Political militia	Civilians (Zimbabwe)		Civilians	Political militia-Civilians	Civilian targeting	716	Southern Africa	Zimbabwe	Mashonaland Central	Bindura Urban		Bindura	-17.2964	31.3297	1	Zimbabwe Human Rights NGO Forum	Other	Farmer beaten in Hwedza	0		1618597779
ZIM194	2000-04-01	2000	1	Political violence	Violence against civilians	Attack	ZNLWVA: Zimbabwe National Liberation War Veterans Association		Political militia	Civilians (Zimbabwe)		Civilians	Political militia-Civilians	Civilian targeting	716	Southern Africa	Zimbabwe	Mashonaland East	Marondera Urban		Marondera	-18.1833	31.55	1	Zimbabwe Human Rights NGO Forum	Other	Constable Chikwanda killed after being involved in investigations into war veteran involvement in beatings	1		1618597779
ZIM192	2000-04-01	2000	1	Political violence	Violence against civilians	Attack	ZANU-PF: Zimbabwe African National Union-Patriotic Front	ZNLWVA: Zimbabwe National Liberation War Veterans Association	Political militia	Civilians (Zimbabwe)		Civilians	Political militia-Civilians	Civilian targeting	716	Southern Africa	Zimbabwe	Mashonaland East	Marondera Urban		Marondera	-18.1833	31.55	1	Zimbabwe Human Rights NGO Forum	Other	Farmer beaten	0		1618597779
ZIM191	2000-04-01	2000	1	Political violence	Violence against civilians	Attack	ZANU-PF: Zimbabwe African National Union-Patriotic Front		Political militia	Civilians (Zimbabwe)		Civilians	Political militia-Civilians	Civilian targeting	716	Southern Africa	Zimbabwe	Midlands	Kwekwe Urban		Kwekwe	-18.9166	29.8167	1	Zimbabwe Human Rights NGO Forum	Other	On 1 April 2000
ZIM195	2000-04-02	2000	1	Political violence	Violence against civilians	Attack	MDC: Movement for Democratic Change		Political militia	Civilians (Zimbabwe)		Civilians	Political militia-Civilians	Civilian targeting	716	Southern Africa	Zimbabwe	Mashonaland Central	Bindura Urban		Bindura	-17.2964	31.3297	1	Zimbabwe Human Rights NGO Forum	Other	In Chihota	0		1618597779
ZIM196	2000-04-02	2000	1	Political violence	Violence against civilians	Attack	ZANU-PF: Zimbabwe African National Union-Patriotic Front		Political militia	Civilians (Zimbabwe)		Civilians	Political militia-Civilians	Civilian targeting	716	Southern Africa	Zimbabwe	Mashonaland Central	Centenary		Centenary	-16.7299	31.1178	1	Zimbabwe Human Rights NGO Forum	Other	Man killed after scuffle with Zanu-PF. No date given so coded with approximation	1		1618597779
ZIM197	2000-04-02	2000	1	Political violence	Violence against civilians	Attack	ZANU-PF: Zimbabwe African National Union-Patriotic Front		Political militia	Civilians (Zimbabwe)	Women (Zimbabwe)	Civilians	Political militia-Civilians	Civilian targeting	716	Southern Africa	Zimbabwe	Mashonaland Central	Mvurwi		Mvurwi	-17.0333	30.85	1	Zimbabwe Human Rights NGO Forum	Other	Pregnant woman killed as Zanu-PF attacked MDC supporters returning from a rally	1	women targeted: political party supporters	1638981224
ZIM199	2000-04-04	2000	1	Political violence	Violence against civilians	Attack	ZANU-PF: Zimbabwe African National Union-Patriotic Front		Political militia	Civilians (Zimbabwe)		Civilians	Political militia-Civilians	Civilian targeting	716	Southern Africa	Zimbabwe	Midlands	Kwekwe Urban		Kwekwe	-18.9166	29.8167	1	Zimbabwe Human Rights NGO Forum	Other	On 4 April 2000
ZIM198	2000-04-04	2000	1	Political violence	Violence against civilians	Attack	MDC: Movement for Democratic Change		Political militia	Civilians (Zimbabwe)		Civilians	Political militia-Civilians	Civilian targeting	716	Southern Africa	Zimbabwe	Midlands	Zvishavane Urban		Zvishavane	-20.3333	30.0333	1	Zimbabwe Human Rights NGO Forum	Other	On 4 April 2000
ZIM202	2000-04-08	2000	1	Political violence	Violence against civilians	Attack	ZANU-PF: Zimbabwe African National Union-Patriotic Front		Political militia	Civilians (Zimbabwe)		Civilians	Political militia-Civilians	Civilian targeting	716	Southern Africa	Zimbabwe	Mashonaland Central	Mount Darwin		Mt. Darwin	-16.7833	31.5833	1	Zimbabwe Human Rights NGO Forum	Other	MDC chairman for Nembire
ZIM203	2000-04-08	2000	1	Political violence	Violence against civilians	Attack	ZANU-PF: Zimbabwe African National Union-Patriotic Front		Political militia	Civilians (Zimbabwe)		Civilians	Political militia-Civilians	Civilian targeting	716	Southern Africa	Zimbabwe	Mashonaland Central	Mount Darwin		Mt. Darwin	-16.7833	31.5833	1	Zimbabwe Human Rights NGO Forum	Other	MDC claims attackers were in pay of local Zanu-PF officials who orchestrated the attack	0		1618597779
ZIM201	2000-04-08	2000	1	Political violence	Violence against civilians	Abduction/forced disappearance	MDC: Movement for Democratic Change		Political militia	Civilians (Zimbabwe)		Civilians	Political militia-Civilians	Civilian targeting	716	Southern Africa	Zimbabwe	Harare	Harare Urban		Harare	-17.8277	31.0534	1	Zimbabwe Human Rights NGO Forum	Other	War vets attacked
ZIM200	2000-04-08	2000	1	Demonstrations	Riots	Violent demonstration	Rioters (Zimbabwe)		Rioters				Rioters only		716	Southern Africa	Zimbabwe	Mashonaland Central	Mazowe		Mazowe	-17.5166	30.9667	1	Zimbabwe Human Rights NGO Forum	Other	2000 MDC youths led by Mazowe East Constituency candidate Shepherd Mushonga	0		1618597779
ZIM204	2000-04-09	2000	1	Political violence	Violence against civilians	Attack	ZANU-PF: Zimbabwe African National Union-Patriotic Front	Military Forces of Zimbabwe (1987-2017) Central Intelligence Organization	Political militia	Civilians (Zimbabwe)		Civilians	Political militia-Civilians	Civilian targeting	716	Southern Africa	Zimbabwe	Masvingo	Masvingo Urban		Masvingo	-20.0833	30.8333	1	Amnesty International	Other	On 9 April 2000
ZIM205	2000-04-10	2000	1	Political violence	Violence against civilians	Attack	ZANU-PF: Zimbabwe African National Union-Patriotic Front	ZNLWVA: Zimbabwe National Liberation War Veterans Association	Political militia	Civilians (Zimbabwe)	MDC: Movement for Democratic Change	Civilians	Political militia-Civilians	Civilian targeting	716	Southern Africa	Zimbabwe	Mashonaland East	Murehwa		Murehwa	-17.6469	31.7775	1	Zimbabwe Human Rights NGO Forum	Other	MDC supporter and mother beaten
ZIM206	2000-04-12	2000	1	Political violence	Violence against civilians	Attack	ZNLWVA: Zimbabwe National Liberation War Veterans Association		Political militia	Civilians (Zimbabwe)		Civilians	Political militia-Civilians	Civilian targeting	716	Southern Africa	Zimbabwe	Matabeleland South	Mangwe		Empandeni Mission	-20.7166	27.9	1	Zimbabwe Human Rights NGO Forum	Other	Farm workers forced to leave their farms and occupy 2 white-owned neighbouring farms	0		1618597778
ZIM211	2000-04-13	2000	1	Political violence	Violence against civilians	Attack	MDC: Movement for Democratic Change		Political militia	Civilians (Zimbabwe)		Civilians	Political militia-Civilians	Civilian targeting	716	Southern Africa	Zimbabwe	Matabeleland South	Plumtree		Plumtree	-20.4833	27.8167	2	Zimbabwe Human Rights NGO Forum	Other	Freedom Tshuma
ZIM208	2000-04-13	2000	1	Political violence	Violence against civilians	Attack	ZANU-PF: Zimbabwe African National Union-Patriotic Front	Military Forces of Zimbabwe (1987-2017) Central Intelligence Organization	Political militia	Civilians (Zimbabwe)		Civilians	Political militia-Civilians	Civilian targeting	716	Southern Africa	Zimbabwe	Mashonaland Central	Mount Darwin		Mt. Darwin	-16.7833	31.5833	1	Zimbabwe Human Rights NGO Forum	Other	MDC supporters ambushed and attacked twice along same road	0		1618597778
ZIM207	2000-04-13	2000	1	Political violence	Violence against civilians	Attack	Military Forces of Zimbabwe (1987-2017)		State forces	Civilians (Zimbabwe)		Civilians	State forces-Civilians	Civilian targeting	716	Southern Africa	Zimbabwe	Mashonaland Central	Mount Darwin		Mt. Darwin	-16.7833	31.5833	1	Zimbabwe Human Rights NGO Forum	Other	Army beat Zanu-PF supporters (including candidate Kasukuwere) who were involved in ambush of MDC supporters	0		1618597778
ZIM209	2000-04-13	2000	1	Political violence	Violence against civilians	Attack	ZANU-PF: Zimbabwe African National Union-Patriotic Front		Political militia	Civilians (Zimbabwe)		Civilians	Political militia-Civilians	Civilian targeting	716	Southern Africa	Zimbabwe	Mashonaland West	Norton		Norton	-17.8833	30.7	1	Zimbabwe Human Rights NGO Forum	Other	On 13 April 2000
ZIM212	2000-04-14	2000	1	Political violence	Violence against civilians	Sexual violence	ZNLWVA: Zimbabwe National Liberation War Veterans Association		Political militia	Civilians (Zimbabwe)	Women (Zimbabwe)	Civilians	Political militia-Civilians	Civilian targeting	716	Southern Africa	Zimbabwe	Mashonaland East	Murehwa		Arizona	-17.8583	31.9517	1	Zimbabwe Human Rights NGO Forum	Other	Farm workers daughter raped by war vet	0	women targeted: girls	1638981224
ZIM213	2000-04-15	2000	1	Political violence	Violence against civilians	Attack	ZNLWVA: Zimbabwe National Liberation War Veterans Association		Political militia	Civilians (Zimbabwe)		Civilians	Political militia-Civilians	Civilian targeting	716	Southern Africa	Zimbabwe	Mashonaland East	Murehwa		Macheke	-18.15	31.85	1	Amnesty International	Other	One killed
ZIM215	2000-04-15	2000	1	Political violence	Violence against civilians	Attack	MDC: Movement for Democratic Change		Political militia	Civilians (Zimbabwe)		Civilians	Political militia-Civilians	Civilian targeting	716	Southern Africa	Zimbabwe	Mashonaland East	Chikomba		Chikomba	-18.7517	30.8963	2	Zimbabwe Human Rights NGO Forum	Other	MDC parliamentary candidate for Chikomba
ZIM218	2000-04-15	2000	1	Political violence	Violence against civilians	Attack	ZNLWVA: Zimbabwe National Liberation War Veterans Association	ZANU-PF: Zimbabwe African National Union-Patriotic Front	Political militia	Civilians (Zimbabwe)		Civilians	Political militia-Civilians	Civilian targeting	716	Southern Africa	Zimbabwe	Mashonaland East	Murehwa		Murehwa	-17.6469	31.7775	1	Zimbabwe Human Rights NGO Forum	Other	UP member attacked at Zanu-PF rally	0		1618597778
ZIM217	2000-04-15	2000	1	Political violence	Violence against civilians	Attack	ZANU-PF: Zimbabwe African National Union-Patriotic Front		Political militia	Civilians (Zimbabwe)		Civilians	Political militia-Civilians	Civilian targeting	716	Southern Africa	Zimbabwe	Mashonaland East	Mutoko		Mutoko	-17.4	32.2167	1	Zimbabwe Human Rights NGO Forum	Other	UP supporter and her son beaten	0		1618597778
ZIM214	2000-04-15	2000	1	Political violence	Violence against civilians	Attack	Military Forces of Zimbabwe (1987-2017) Central Intelligence Organization	ZNLWVA: Zimbabwe National Liberation War Veterans Association	State forces	Civilians (Zimbabwe)		Civilians	State forces-Civilians	Civilian targeting	716	Southern Africa	Zimbabwe	Manicaland	Buhera		Buhera	-19.3333	31.4333	1	Amnesty International	Other	Victims were MDC members Tichaona Chiminya and Talent Mabika	2		1618597778
ZIM216	2000-04-15	2000	1	Political violence	Violence against civilians	Attack	MDC: Movement for Democratic Change		Political militia	Civilians (Zimbabwe)		Civilians	Political militia-Civilians	Civilian targeting	716	Southern Africa	Zimbabwe	Harare	Harare Urban		Harare	-17.8277	31.0534	1	Zimbabwe Human Rights NGO Forum	Other	On 15 April 2000
ZIM219	2000-04-16	2000	1	Political violence	Violence against civilians	Attack	ZANU-PF: Zimbabwe African National Union-Patriotic Front		Political militia	Civilians (Zimbabwe)		Civilians	Political militia-Civilians	Civilian targeting	716	Southern Africa	Zimbabwe	Harare	Harare Urban		Harare	-17.8277	31.0534	1	Zimbabwe Human Rights NGO Forum	Other	On 16 April 2000
ZIM220	2000-04-17	2000	1	Political violence	Violence against civilians	Attack	ZNLWVA: Zimbabwe National Liberation War Veterans Association		Political militia	Civilians (Zimbabwe)		Civilians	Political militia-Civilians	Civilian targeting	716	Southern Africa	Zimbabwe	Mashonaland East	Murehwa		Murehwa	-17.6469	31.7775	1	Zimbabwe Human Rights NGO Forum	Other	Stephens abducted
ZIM223	2000-04-18	2000	1	Political violence	Violence against civilians	Attack	ZNLWVA: Zimbabwe National Liberation War Veterans Association		Political militia	Civilians (Zimbabwe)		Civilians	Political militia-Civilians	Civilian targeting	716	Southern Africa	Zimbabwe	Bulawayo	Bulawayo		Bulawayo	-20.15	28.58	1	Zimbabwe Human Rights NGO Forum	Other	Martin Olds murdered	1		1618597778
ZIM224	2000-04-18	2000	1	Political violence	Violence against civilians	Attack	ZNLWVA: Zimbabwe National Liberation War Veterans Association		Political militia	Civilians (Zimbabwe)		Civilians	Political militia-Civilians	Civilian targeting	716	Southern Africa	Zimbabwe	Harare	Harare Urban		Harare	-17.8277	31.0534	1	Zimbabwe Human Rights NGO Forum	Other	Location undisclosed.3 hour gun battle between war vets and lone farmer	0		1618597778
ZIM222	2000-04-18	2000	1	Political violence	Violence against civilians	Sexual violence	ZANU-PF: Zimbabwe African National Union-Patriotic Front		Political militia	Civilians (Zimbabwe)	Women (Zimbabwe)	Civilians	Political militia-Civilians	Civilian targeting	716	Southern Africa	Zimbabwe	Mashonaland East	Murehwa		Murehwa	-17.6469	31.7775	1	Zimbabwe Human Rights NGO Forum	Other	Zanu-PF supporters beat a number of MDC supporters
ZIM225	2000-04-19	2000	1	Political violence	Riots	Mob violence	Rioters (Zimbabwe)	ZANU-PF: Zimbabwe African National Union-Patriotic Front	Rioters	Rioters (Zimbabwe)	MDC: Movement for Democratic Change	Rioters	Rioters-Rioters		716	Southern Africa	Zimbabwe	Harare	Harare Urban		Harare	-17.8277	31.0534	1	Zimbabwe Human Rights NGO Forum	Other	MDC youths attending a funeral clashed with Zanu-PF who were at Mugabes house	0		1618597778
ZIM226	2000-04-19	2000	1	Political violence	Violence against civilians	Attack	MDC: Movement for Democratic Change		Political militia	Civilians (Zimbabwe)		Civilians	Political militia-Civilians	Civilian targeting	716	Southern Africa	Zimbabwe	Bulawayo	Bulawayo		Pumula-Luveve	-20.1444	28.4733	1	Zimbabwe Human Rights NGO Forum	Other	On 19 April 2000
ZIM228	2000-04-20	2000	1	Political violence	Violence against civilians	Attack	Unidentified Armed Group (Zimbabwe)		Political militia	Civilians (Zimbabwe)		Civilians	Political militia-Civilians	Civilian targeting	716	Southern Africa	Zimbabwe	Mashonaland East	Murehwa		Murehwa	-17.6469	31.7775	1	Zimbabwe Human Rights NGO Forum	Other	Julius Andoche killed	1		1618597778
ZIM227	2000-04-20	2000	1	Political violence	Violence against civilians	Abduction/forced disappearance	ZANU-PF: Zimbabwe African National Union-Patriotic Front		Political militia	Civilians (Zimbabwe)		Civilians	Political militia-Civilians	Civilian targeting	716	Southern Africa	Zimbabwe	Mashonaland East	Mutoko		Mutoko	-17.4	32.2167	1	Amnesty International	Other	Matthew Rukwata Dovi
ZIM229	2000-04-20	2000	1	Political violence	Violence against civilians	Attack	ZANU-PF: Zimbabwe African National Union-Patriotic Front		Political militia	Civilians (Zimbabwe)		Civilians	Political militia-Civilians	Civilian targeting	716	Southern Africa	Zimbabwe	Mashonaland Central	Mount Darwin		Mt. Darwin	-16.7833	31.5833	1	Zimbabwe Human Rights NGO Forum	Other	On 20 April 2000
ZIM230	2000-04-21	2000	1	Political violence	Violence against civilians	Sexual violence	ZANU-PF: Zimbabwe African National Union-Patriotic Front		Political militia	Civilians (Zimbabwe)	Christian Group (Zimbabwe); Women (Zimbabwe)	Civilians	Political militia-Civilians	Civilian targeting	716	Southern Africa	Zimbabwe	Mashonaland East	Murehwa		St. Pauls Mission	-17.75	31.5833	1	Zimbabwe Human Rights NGO Forum	Other	2 women brutally attacked returning from church. 1 gang raped by 4 Zanu-PF	0		1618597778
ZIM231	2000-04-22	2000	1	Political violence	Explosions/Remote violence	Remote explosive/landmine/IED	Unidentified Armed Group (Zimbabwe)		Political militia	Civilians (Zimbabwe)		Civilians	Political militia-Civilians	Civilian targeting	716	Southern Africa	Zimbabwe	Harare	Harare Urban		Harare	-17.8277	31.0534	1	Daily Times (Nigeria)	International	Offices bombed by suspected ZANU-PF affiliates	0		1618597778
ZIM232	2000-04-23	2000	1	Political violence	Violence against civilians	Sexual violence	Unidentified Armed Group (Zimbabwe)		Political militia	Civilians (Zimbabwe)	Women (Zimbabwe)	Civilians	Political militia-Civilians	Civilian targeting	716	Southern Africa	Zimbabwe	Harare	Harare Urban		Harare	-17.8277	31.0534	1	Zimbabwe Human Rights NGO Forum	Other	Date reflects publication of report in Standard paper.2 white sisters (daughters of head of CFU) raped
ZIM233	2000-04-24	2000	1	Political violence	Explosions/Remote violence	Remote explosive/landmine/IED	ZANU-PF: Zimbabwe African National Union-Patriotic Front		Political militia	Civilians (Zimbabwe)	Journalists (Zimbabwe)	Civilians	Political militia-Civilians	Civilian targeting	716	Southern Africa	Zimbabwe	Harare	Harare Urban		Harare	-17.8277	31.0534	1	Zimbabwe Human Rights NGO Forum	Other	Daily News offices bombed	0		1618597778
ZIM235	2000-04-24	2000	1	Political violence	Violence against civilians	Attack	ZANU-PF: Zimbabwe African National Union-Patriotic Front		Political militia	Civilians (Zimbabwe)		Civilians	Political militia-Civilians	Civilian targeting	716	Southern Africa	Zimbabwe	Mashonaland Central	Shamva		Shamva	-17.3166	31.5667	1	Zimbabwe Human Rights NGO Forum	Other	Victim hospitalised
ZIM236	2000-04-24	2000	1	Political violence	Violence against civilians	Attack	ZNLWVA: Zimbabwe National Liberation War Veterans Association		Political militia	Civilians (Zimbabwe)		Civilians	Political militia-Civilians	Civilian targeting	716	Southern Africa	Zimbabwe	Mashonaland East	Hwedza		Wedza	-18.6167	31.5667	1	Zimbabwe Human Rights NGO Forum	Other	Farm workers attacked
ZIM234	2000-04-24	2000	1	Political violence	Violence against civilians	Attack	ZANU-PF: Zimbabwe African National Union-Patriotic Front		Political militia	Civilians (Zimbabwe)		Civilians	Political militia-Civilians	Civilian targeting	716	Southern Africa	Zimbabwe	Mashonaland West	Kariba Urban		Kariba	-16.5166	28.8	1	Zimbabwe Human Rights NGO Forum	Other	On 24 April 2000
ZIM238	2000-04-25	2000	1	Political violence	Violence against civilians	Attack	ZANU-PF: Zimbabwe African National Union-Patriotic Front		Political militia	Civilians (Zimbabwe)		Civilians	Political militia-Civilians	Civilian targeting	716	Southern Africa	Zimbabwe	Mashonaland Central	Mount Darwin		Chesa Division	-16.75	31.8333	1	Zimbabwe Human Rights NGO Forum	Other	MDC provincial organising secretarys house burned
ZIM237	2000-04-25	2000	1	Political violence	Violence against civilians	Attack	ZANU-PF: Zimbabwe African National Union-Patriotic Front		Political militia	Civilians (Zimbabwe)		Civilians	Political militia-Civilians	Civilian targeting	716	Southern Africa	Zimbabwe	Midlands	Gokwe South Urban		Gokwe	-18.2166	28.9333	1	Amnesty International	Other	MDC chairman for Gokwe Central Vusumuzi Mukweli severely beaten	0		1618597778
ZIM240	2000-04-25	2000	1	Political violence	Violence against civilians	Attack	ZNLWVA: Zimbabwe National Liberation War Veterans Association		Political militia	Civilians (Zimbabwe)		Civilians	Political militia-Civilians	Civilian targeting	716	Southern Africa	Zimbabwe	Mashonaland West	Kariba Urban		Kariba	-16.5166	28.8	1	Zimbabwe Human Rights NGO Forum	Other	Rex Jesus and war veterans abduct 18 MDC supporters
ZIM239	2000-04-25	2000	1	Political violence	Violence against civilians	Attack	ZANU-PF: Zimbabwe African National Union-Patriotic Front	ZNLWVA: Zimbabwe National Liberation War Veterans Association	Political militia	Civilians (Zimbabwe)		Civilians	Political militia-Civilians	Civilian targeting	716	Southern Africa	Zimbabwe	Mashonaland Central	Mount Darwin		Mt. Darwin	-16.7833	31.5833	1	Zimbabwe Human Rights NGO Forum	Other	On 25 April 2000
ZIM242	2000-04-26	2000	1	Political violence	Violence against civilians	Attack	MDC: Movement for Democratic Change		Political militia	Civilians (Zimbabwe)		Civilians	Political militia-Civilians	Civilian targeting	716	Southern Africa	Zimbabwe	Mashonaland Central	Bindura Urban		Bindura	-17.2964	31.3297	1	Zimbabwe Human Rights NGO Forum	Other	On 26 April 2000
ZIM243	2000-04-27	2000	1	Political violence	Violence against civilians	Attack	ZANU-PF: Zimbabwe African National Union-Patriotic Front		Political militia	Civilians (Zimbabwe)		Civilians	Political militia-Civilians	Civilian targeting	716	Southern Africa	Zimbabwe	Midlands	Mberengwa		Mberengwa	-20.4833	29.9167	1	Zimbabwe Human Rights NGO Forum	Other	On 27 April 2000
ZIM244	2000-04-28	2000	1	Political violence	Violence against civilians	Attack	ZANU-PF: Zimbabwe African National Union-Patriotic Front	Military Forces of Zimbabwe (1987-2017) Central Intelligence Organization	Political militia	Civilians (Zimbabwe)		Civilians	Political militia-Civilians	Civilian targeting	716	Southern Africa	Zimbabwe	Harare	Harare Urban		Kambuzuma	-17.8552	30.9672	1	Zimbabwe Human Rights NGO Forum	Other	MDC official abducted
ZIM245	2000-04-28	2000	1	Political violence	Violence against civilians	Attack	MDC: Movement for Democratic Change		Political militia	Civilians (Zimbabwe)		Civilians	Political militia-Civilians	Civilian targeting	716	Southern Africa	Zimbabwe	Mashonaland West	Kadoma Urban		Kadoma	-18.35	29.9167	2	Zimbabwe Human Rights NGO Forum	Other	MDC supporters
ZIM247	2000-04-30	2000	1	Political violence	Violence against civilians	Attack	MDC: Movement for Democratic Change		Political militia	Civilians (Zimbabwe)		Civilians	Political militia-Civilians	Civilian targeting	716	Southern Africa	Zimbabwe	Harare	Harare Urban		Harare	-17.8277	31.0534	1	Zimbabwe Human Rights NGO Forum	Other	Tobias Mutazu
ZIM248	2000-04-30	2000	1	Political violence	Violence against civilians	Attack	ZANU-PF: Zimbabwe African National Union-Patriotic Front		Political militia	Civilians (Zimbabwe)		Civilians	Political militia-Civilians	Civilian targeting	716	Southern Africa	Zimbabwe	Mashonaland Central	Centenary		Mukumbura Tribal Trust Land	-16.25	31.4167	1	Zimbabwe Human Rights NGO Forum	Other	Matthew Pfebve killed
ZIM250	2000-05-01	2000	1	Political violence	Violence against civilians	Attack	ZANU-PF: Zimbabwe African National Union-Patriotic Front	ZNLWVA: Zimbabwe National Liberation War Veterans Association	Political militia	Civilians (Zimbabwe)		Civilians	Political militia-Civilians	Civilian targeting	716	Southern Africa	Zimbabwe	Mashonaland Central	Mazowe		Archie Henderson Research Station	-17.5666	30.9667	1	Zimbabwe Human Rights NGO Forum	Other	Family members beaten when MDC official discovered to be from home	0		1618597778
ZIM256	2000-05-01	2000	1	Political violence	Violence against civilians	Attack	ZANU-PF: Zimbabwe African National Union-Patriotic Front		Political militia	Civilians (Zimbabwe)	Teachers (Zimbabwe)	Civilians	Political militia-Civilians	Civilian targeting	716	Southern Africa	Zimbabwe	Mashonaland East	Mudzi		Mudzi	-17.1333	32.6666	1	Zimbabwe Human Rights NGO Forum	Other	Teachers assaulted by Zanu-PF in numerous schools	0		1618597778
ZIM258	2000-05-01	2000	1	Political violence	Violence against civilians	Attack	ZANU-PF: Zimbabwe African National Union-Patriotic Front		Political militia	Civilians (Zimbabwe)	Teachers (Zimbabwe)	Civilians	Political militia-Civilians	Civilian targeting	716	Southern Africa	Zimbabwe	Mashonaland East	Murehwa		Murehwa	-17.6469	31.7775	1	Zimbabwe Human Rights NGO Forum	Other	Teachers assaulted by Zanu-PF in numerous schools	0		1618597778
ZIM252	2000-05-01	2000	1	Political violence	Violence against civilians	Attack	ZANU-PF: Zimbabwe African National Union-Patriotic Front		Political militia	Civilians (Zimbabwe)		Civilians	Political militia-Civilians	Civilian targeting	716	Southern Africa	Zimbabwe	Mashonaland West	Karoi Urban		Karoi	-16.8166	29.6833	1	Zimbabwe Human Rights NGO Forum	Other	General Agriculture Plantations Workers Union of Zimbabwe (GAPWUZ) organising secretary attacked	0		1618597778
ZIM263	2000-05-01	2000	1	Political violence	Violence against civilians	Attack	ZNLWVA: Zimbabwe National Liberation War Veterans Association	ZANU-PF: Zimbabwe African National Union-Patriotic Front	Political militia	Civilians (Zimbabwe)		Civilians	Political militia-Civilians	Civilian targeting	716	Southern Africa	Zimbabwe	Mashonaland East	Murehwa		Murehwa	-17.6469	31.7775	1	Zimbabwe Human Rights NGO Forum	Other	Farm workers and families attacked
ZIM255	2000-05-01	2000	1	Political violence	Violence against civilians	Sexual violence	ZANU-PF: Zimbabwe African National Union-Patriotic Front		Political militia	Civilians (Zimbabwe)	Women (Zimbabwe)	Civilians	Political militia-Civilians	Civilian targeting	716	Southern Africa	Zimbabwe	Mashonaland East	Mudzi		Mudzi	-17.1333	32.6666	1	Zimbabwe Human Rights NGO Forum	Other	Middle-aged woman raped by Zanu-PF in front of children and neighbours	0		1618597778
ZIM254	2000-05-01	2000	1	Political violence	Violence against civilians	Attack	ZANU-PF: Zimbabwe African National Union-Patriotic Front		Political militia	Civilians (Zimbabwe)		Civilians	Political militia-Civilians	Civilian targeting	716	Southern Africa	Zimbabwe	Midlands	Mberengwa		Mberengwa	-20.4833	29.9167	1	Zimbabwe Human Rights NGO Forum	Other	Family of MDC organising secretary attacked	0		1618597778
ZIM251	2000-05-01	2000	1	Political violence	Violence against civilians	Attack	ZANU-PF: Zimbabwe African National Union-Patriotic Front		Political militia	Civilians (Zimbabwe)	Women (Zimbabwe)	Civilians	Political militia-Civilians	Civilian targeting	716	Southern Africa	Zimbabwe	Matabeleland North	Binga		Binga	-17.6166	27.3333	1	Zimbabwe Human Rights NGO Forum	Other	Nun attacked by Zanu-PF	0		1618597778
ZIM259	2000-05-01	2000	1	Political violence	Violence against civilians	Sexual violence	ZANU-PF: Zimbabwe African National Union-Patriotic Front		Political militia	Civilians (Zimbabwe)	Women (Zimbabwe)	Civilians	Political militia-Civilians	Civilian targeting	716	Southern Africa	Zimbabwe	Mashonaland East	Murehwa		Musami	-17.8	31.6333	1	Zimbabwe Human Rights NGO Forum	Other	10 females raped by Zanu-PF	0		1618597778
ZIM261	2000-05-01	2000	1	Political violence	Violence against civilians	Attack	ZANU-PF: Zimbabwe African National Union-Patriotic Front		Political militia	Civilians (Zimbabwe)	Teachers (Zimbabwe)	Civilians	Political militia-Civilians	Civilian targeting	716	Southern Africa	Zimbabwe	Mashonaland East	Mutoko		Mutoko	-17.4	32.2167	1	Zimbabwe Human Rights NGO Forum	Other	Teachers assaulted by Zanu-PF in numerous schools	0		1618597778
ZIM260	2000-05-01	2000	1	Political violence	Violence against civilians	Sexual violence	ZANU-PF: Zimbabwe African National Union-Patriotic Front	ZNLWVA: Zimbabwe National Liberation War Veterans Association	Political militia	Civilians (Zimbabwe)	Women (Zimbabwe)	Civilians	Political militia-Civilians	Civilian targeting	716	Southern Africa	Zimbabwe	Manicaland	Mutare Urban		Mutare	-18.9707	32.6709	1	Zimbabwe Human Rights NGO Forum	Other	Date not given
ZIM257	2000-05-01	2000	1	Political violence	Violence against civilians	Sexual violence	ZANU-PF: Zimbabwe African National Union-Patriotic Front		Political militia	Civilians (Zimbabwe)	Women (Zimbabwe)	Civilians	Political militia-Civilians	Civilian targeting	716	Southern Africa	Zimbabwe	Mashonaland East	Murehwa		Murehwa	-17.6469	31.7775	1	Zimbabwe Human Rights NGO Forum	Other	Sketchy reports of Zanu-PF supporters forcing girls of 15/16 to attend pungwes. Prostitutes report that these girls are raped etc	0	women targeted: girls	1638981224
ZIM262	2000-05-01	2000	1	Political violence	Violence against civilians	Attack	ZANU-PF: Zimbabwe African National Union-Patriotic Front		Political militia	Civilians (Zimbabwe)		Civilians	Political militia-Civilians	Civilian targeting	716	Southern Africa	Zimbabwe	Mashonaland West	Norton		Norton	-17.8833	30.7	1	Zimbabwe Human Rights NGO Forum	Other	On 1 May 2000
ZIM253	2000-05-01	2000	1	Political violence	Violence against civilians	Attack	ZANU-PF: Zimbabwe African National Union-Patriotic Front		Political militia	Civilians (Zimbabwe)		Civilians	Political militia-Civilians	Civilian targeting	716	Southern Africa	Zimbabwe	Midlands	Mberengwa		Manyenge School	-20.95	30.2833	1	Zimbabwe Human Rights NGO Forum	Other	On 1 May 2000
ZIM249	2000-05-01	2000	1	Political violence	Violence against civilians	Attack	MDC: Movement for Democratic Change		Political militia	Civilians (Zimbabwe)		Civilians	Political militia-Civilians	Civilian targeting	716	Southern Africa	Zimbabwe	Midlands	Mberengwa		Mataga	-20.85	30.2	1	Zimbabwe Human Rights NGO Forum	Other	On 1 May 2000
ZIM265	2000-05-02	2000	1	Political violence	Riots	Mob violence	Rioters (Zimbabwe)		Rioters	Civilians (Zimbabwe)		Civilians	Rioters-Civilians	Civilian targeting	716	Southern Africa	Zimbabwe	Mashonaland Central	Mazowe		Mazowe	-17.5166	30.9667	1	Zimbabwe Human Rights NGO Forum	Other	Farm worker attacked	0		1618597778
ZIM264	2000-05-02	2000	1	Political violence	Riots	Mob violence	Rioters (Zimbabwe)		Rioters	Civilians (Zimbabwe)		Civilians	Rioters-Civilians	Civilian targeting	716	Southern Africa	Zimbabwe	Mashonaland Central	Mazowe		Mazowe	-17.5166	30.9667	1	Zimbabwe Human Rights NGO Forum	Other	Farm supervisor attacked	0		1618597778
ZIM266	2000-05-03	2000	1	Political violence	Violence against civilians	Abduction/forced disappearance	Unidentified Armed Group (Zimbabwe)		Political militia	Civilians (Zimbabwe)	Health Workers (Zimbabwe)	Civilians	Political militia-Civilians	Civilian targeting	716	Southern Africa	Zimbabwe	Mashonaland East	Murehwa		Murehwa	-17.6469	31.7775	1	Zimbabwe Human Rights NGO Forum	Other	2 nurses abducted. Perpetrators most likely Zanu-PF attempting to terrorise health workers into refusing treatment to opposition	0		1618597778
ZIM267	2000-05-03	2000	1	Political violence	Violence against civilians	Attack	ZANU-PF: Zimbabwe African National Union-Patriotic Front		Political militia	Civilians (Zimbabwe)		Civilians	Political militia-Civilians	Civilian targeting	716	Southern Africa	Zimbabwe	Mashonaland Central	Bindura Urban		Bindura	-17.2964	31.3297	1	Zimbabwe Human Rights NGO Forum	Other	Farm workers forced to attend pungwe. Reports of at least 7 other such happenings
ZIM268	2000-05-03	2000	1	Political violence	Violence against civilians	Attack	ZANU-PF: Zimbabwe African National Union-Patriotic Front		Political militia	Civilians (Zimbabwe)		Civilians	Political militia-Civilians	Civilian targeting	716	Southern Africa	Zimbabwe	Matabeleland South	Insiza		Filabusi	-20.5333	29.2833	1	Zimbabwe Human Rights NGO Forum	Other	MDC supporters - including candidate - severely assaulted	0		1618597778
ZIM270	2000-05-04	2000	1	Political violence	Violence against civilians	Attack	ZANU-PF: Zimbabwe African National Union-Patriotic Front		Political militia	Civilians (Zimbabwe)		Civilians	Political militia-Civilians	Civilian targeting	716	Southern Africa	Zimbabwe	Bulawayo	Bulawayo		Bulawayo	-20.15	28.58	1	Zimbabwe Human Rights NGO Forum	Other	Vendor selling herbal products badly beaten for putting warning on products that they warm the hand. As a result they were suspected of MDC affiliation and punished	0		1618597778
ZIM271	2000-05-05	2000	1	Political violence	Violence against civilians	Attack	ZANU-PF: Zimbabwe African National Union-Patriotic Front		Political militia	Civilians (Zimbabwe)		Civilians	Political militia-Civilians	Civilian targeting	716	Southern Africa	Zimbabwe	Midlands	Mberengwa		Mataga	-20.85	30.2	1	Zimbabwe Human Rights NGO Forum	Other	MDC supporters abducted
ZIM272	2000-05-05	2000	1	Political violence	Violence against civilians	Attack	ZANU-PF: Zimbabwe African National Union-Patriotic Front		Political militia	Civilians (Zimbabwe)		Civilians	Political militia-Civilians	Civilian targeting	716	Southern Africa	Zimbabwe	Mashonaland Central	Mvurwi		Mvurwi	-17.0333	30.85	1	Zimbabwe Human Rights NGO Forum	Other	On 5 May 2000
ZIM274	2000-05-06	2000	1	Political violence	Violence against civilians	Attack	ZANU-PF: Zimbabwe African National Union-Patriotic Front		Political militia	Civilians (Zimbabwe)		Civilians	Political militia-Civilians	Civilian targeting	716	Southern Africa	Zimbabwe	Midlands	Mberengwa		Mataga	-20.85	30.2	1	Zimbabwe Human Rights NGO Forum	Other	After being refused entry to night club (no go area for MDC supporters)
ZIM273	2000-05-06	2000	1	Political violence	Violence against civilians	Attack	ZANU-PF: Zimbabwe African National Union-Patriotic Front		Political militia	Civilians (Zimbabwe)		Civilians	Political militia-Civilians	Civilian targeting	716	Southern Africa	Zimbabwe	Midlands	Mberengwa		Mataga	-20.85	30.2	1	Zimbabwe Human Rights NGO Forum	Other	On 6 May 2000
ZIM275	2000-05-07	2000	1	Political violence	Violence against civilians	Attack	Unidentified Armed Group (Zimbabwe)		Political militia	Civilians (Zimbabwe)		Civilians	Political militia-Civilians	Civilian targeting	716	Southern Africa	Zimbabwe	Harare	Harare Urban		Rugare	-17.8566	30.9938	1	Zimbabwe Human Rights NGO Forum	Other	MDC chairman attacked	0		1618597778
ZIM279	2000-05-08	2000	1	Political violence	Violence against civilians	Attack	ZANU-PF: Zimbabwe African National Union-Patriotic Front	ZNLWVA: Zimbabwe National Liberation War Veterans Association	Political militia	Civilians (Zimbabwe)		Civilians	Political militia-Civilians	Civilian targeting	716	Southern Africa	Zimbabwe	Harare	Harare Urban		Harare	-17.8277	31.0534	1	Zimbabwe Human Rights NGO Forum	Other	DC supporters taken to Hunzvis surgery and assaulted	0		1618597778
ZIM280	2000-05-08	2000	1	Political violence	Violence against civilians	Abduction/forced disappearance	ZANU-PF: Zimbabwe African National Union-Patriotic Front		Political militia	Civilians (Zimbabwe)		Civilians	Political militia-Civilians	Civilian targeting	716	Southern Africa	Zimbabwe	Harare	Harare Urban		Harare	-17.8277	31.0534	1	Zimbabwe Human Rights NGO Forum	Other	Guards protecting MDC chairperson abducted	0		1618597778
ZIM277	2000-05-08	2000	1	Political violence	Violence against civilians	Attack	ZANU-PF: Zimbabwe African National Union-Patriotic Front		Political militia	Civilians (Zimbabwe)	Students (Zimbabwe)	Civilians	Political militia-Civilians	Civilian targeting	716	Southern Africa	Zimbabwe	Mashonaland Central	Bindura Urban		Bindura	-17.2964	31.3297	1	Zimbabwe Human Rights NGO Forum	Other	Students attacked	0		1618597778
ZIM276	2000-05-08	2000	1	Political violence	Violence against civilians	Attack	ZANU-PF: Zimbabwe African National Union-Patriotic Front	ZNLWVA: Zimbabwe National Liberation War Veterans Association	Political militia	Civilians (Zimbabwe)		Civilians	Political militia-Civilians	Civilian targeting	716	Southern Africa	Zimbabwe	Harare	Harare Urban		Harare	-17.8277	31.0534	1	Amnesty International	Other	On 8 May 2000
ZIM278	2000-05-08	2000	1	Political violence	Violence against civilians	Attack	ZANU-PF: Zimbabwe African National Union-Patriotic Front	Military Forces of Zimbabwe (1987-2017) Central Intelligence Organization	Political militia	Civilians (Zimbabwe)		Civilians	Political militia-Civilians	Civilian targeting	716	Southern Africa	Zimbabwe	Harare	Harare Urban		Harare	-17.8277	31.0534	1	Zimbabwe Human Rights NGO Forum	Other	On 8 May 2000
ZIM284	2000-05-09	2000	1	Political violence	Violence against civilians	Attack	ZANU-PF: Zimbabwe African National Union-Patriotic Front		Political militia	Civilians (Zimbabwe)		Civilians	Political militia-Civilians	Civilian targeting	716	Southern Africa	Zimbabwe	Mashonaland West	Karoi Urban		Karoi	-16.8166	29.6833	1	Zimbabwe Human Rights NGO Forum	Other	Victim hospitalised
ZIM283	2000-05-09	2000	1	Political violence	Violence against civilians	Attack	Unidentified Armed Group (Zimbabwe)		Political militia	Civilians (Zimbabwe)		Civilians	Political militia-Civilians	Civilian targeting	716	Southern Africa	Zimbabwe	Mashonaland West	Karoi Urban		Karoi	-16.8166	29.6833	1	Zimbabwe Human Rights NGO Forum	Other	Victim abducted
ZIM282	2000-05-09	2000	1	Political violence	Violence against civilians	Attack	ZANU-PF: Zimbabwe African National Union-Patriotic Front		Political militia	Civilians (Zimbabwe)	MDC: Movement for Democratic Change	Civilians	Political militia-Civilians	Civilian targeting	716	Southern Africa	Zimbabwe	Midlands	Kwekwe Urban		Kwekwe	-18.9166	29.8167	1	Amnesty International	Other	On 9 May 2000
ZIM285	2000-05-09	2000	1	Political violence	Violence against civilians	Attack	ZANU-PF: Zimbabwe African National Union-Patriotic Front		Political militia	Civilians (Zimbabwe)	Women (Zimbabwe)	Civilians	Political militia-Civilians	Civilian targeting	716	Southern Africa	Zimbabwe	Mashonaland East	Murehwa		Murehwa	-17.6469	31.7775	1	Zimbabwe Human Rights NGO Forum	Other	Wife of MDC official attacked when he escaped. Brothers house burned	0	women targeted: relatives of targeted groups or persons	1638981224
ZIM287	2000-05-10	2000	1	Political violence	Violence against civilians	Attack	ZANU-PF: Zimbabwe African National Union-Patriotic Front		Political militia	Civilians (Zimbabwe)		Civilians	Political militia-Civilians	Civilian targeting	716	Southern Africa	Zimbabwe	Mashonaland West	Hurungwe		Hurungwe	-17	29.3333	1	Zimbabwe Human Rights NGO Forum	Other	Mark Madiro
ZIM286	2000-05-10	2000	1	Political violence	Violence against civilians	Attack	ZANU-PF: Zimbabwe African National Union-Patriotic Front		Political militia	Civilians (Zimbabwe)		Civilians	Political militia-Civilians	Civilian targeting	716	Southern Africa	Zimbabwe	Mashonaland West	Zvimba		Gomo	-17.1166	30.5167	1	Zimbabwe Human Rights NGO Forum	Other	On 10 May 2000
ZIM288	2000-05-10	2000	1	Political violence	Violence against civilians	Attack	ZNLWVA: Zimbabwe National Liberation War Veterans Association		Political militia	Civilians (Zimbabwe)		Civilians	Political militia-Civilians	Civilian targeting	716	Southern Africa	Zimbabwe	Matabeleland South	Plumtree		Plumtree	-20.4833	27.8167	1	Zimbabwe Human Rights NGO Forum	Other	On 10 May 2000
ZIM292	2000-05-11	2000	1	Political violence	Violence against civilians	Attack	ZNLWVA: Zimbabwe National Liberation War Veterans Association		Political militia	Civilians (Zimbabwe)		Civilians	Political militia-Civilians	Civilian targeting	716	Southern Africa	Zimbabwe	Matabeleland North	Nkayi		Nkayi	-19	28.9	1	Zimbabwe Human Rights NGO Forum	Other	Local headmaster beaten for supposedly supporting MDC	0		1618597778
ZIM289	2000-05-11	2000	1	Political violence	Violence against civilians	Sexual violence	ZANU-PF: Zimbabwe African National Union-Patriotic Front		Political militia	Civilians (Zimbabwe)	Women (Zimbabwe); Teachers (Zimbabwe)	Civilians	Political militia-Civilians	Civilian targeting	716	Southern Africa	Zimbabwe	Mashonaland East	Uzumba-Maramba-Pfungwe		Chitimbe School	-17.45	31.7833	1	Zimbabwe Human Rights NGO Forum	Other	Date reflects publication of report in Daily News.Wife of teacher raped
ZIM290	2000-05-11	2000	1	Political violence	Violence against civilians	Attack	ZANU-PF: Zimbabwe African National Union-Patriotic Front	ZNLWVA: Zimbabwe National Liberation War Veterans Association	Political militia	Civilians (Zimbabwe)		Civilians	Political militia-Civilians	Civilian targeting	716	Southern Africa	Zimbabwe	Harare	Harare Urban		Harare	-17.8277	31.0534	1	Zimbabwe Human Rights NGO Forum	Other	MDC supporters taken to Hunzvis surgery and assaulted	0		1618597778
ZIM291	2000-05-11	2000	1	Political violence	Violence against civilians	Attack	ZANU-PF: Zimbabwe African National Union-Patriotic Front		Political militia	Civilians (Zimbabwe)		Civilians	Political militia-Civilians	Civilian targeting	716	Southern Africa	Zimbabwe	Midlands	Mberengwa		Mberengwa	-20.4833	29.9167	1	Zimbabwe Human Rights NGO Forum	Other	Beating took place in front of Joram Gumbo
ZIM293	2000-05-12	2000	1	Political violence	Violence against civilians	Attack	ZANU-PF: Zimbabwe African National Union-Patriotic Front		Political militia	Civilians (Zimbabwe)		Civilians	Political militia-Civilians	Civilian targeting	716	Southern Africa	Zimbabwe	Matabeleland North	Tsholotsho		Mbizo	-19.2166	27.5167	1	Amnesty International	Other	Blessing Chebundos campaign manager
ZIM294	2000-05-12	2000	1	Political violence	Violence against civilians	Attack	ZANU-PF: Zimbabwe African National Union-Patriotic Front		Political militia	Civilians (Zimbabwe)		Civilians	Political militia-Civilians	Civilian targeting	716	Southern Africa	Zimbabwe	Mashonaland East	Murehwa		Macheke	-18.15	31.85	1	Zimbabwe Human Rights NGO Forum	Other	On 12 May 2000
ZIM298	2000-05-13	2000	1	Political violence	Violence against civilians	Attack	ZNLWVA: Zimbabwe National Liberation War Veterans Association		Political militia	Civilians (Zimbabwe)		Civilians	Political militia-Civilians	Civilian targeting	716	Southern Africa	Zimbabwe	Bulawayo	Bulawayo		Bulawayo	-20.15	28.58	1	Zimbabwe Human Rights NGO Forum	Other	MDC candidate for Nyamandlovu house burned
ZIM296	2000-05-13	2000	1	Political violence	Violence against civilians	Sexual violence	Unidentified Armed Group (Zimbabwe)		Political militia	Civilians (Zimbabwe)	Health Workers (Zimbabwe)	Civilians	Political militia-Civilians	Civilian targeting	716	Southern Africa	Zimbabwe	Mashonaland East	Mudzi		Mudzi	-17.1333	32.6666	1	Zimbabwe Human Rights NGO Forum	Other	Chimukoko Hospital forcibly closed
ZIM295	2000-05-13	2000	1	Political violence	Violence against civilians	Attack	ZANU-PF: Zimbabwe African National Union-Patriotic Front	ZNLWVA: Zimbabwe National Liberation War Veterans Association	Political militia	Civilians (Zimbabwe)		Civilians	Political militia-Civilians	Civilian targeting	716	Southern Africa	Zimbabwe	Harare	Harare Urban		Harare	-17.8277	31.0534	1	Amnesty International	Other	On 13 May 2000
ZIM297	2000-05-13	2000	1	Political violence	Violence against civilians	Attack	ZANU-PF: Zimbabwe African National Union-Patriotic Front		Political militia	Civilians (Zimbabwe)		Civilians	Political militia-Civilians	Civilian targeting	716	Southern Africa	Zimbabwe	Mashonaland East	Murehwa		Macheke	-18.15	31.85	1	Zimbabwe Human Rights NGO Forum	Other	On 13 May 2000
ZIM301	2000-05-14	2000	1	Political violence	Violence against civilians	Attack	ZNLWVA: Zimbabwe National Liberation War Veterans Association		Political militia	Civilians (Zimbabwe)		Civilians	Political militia-Civilians	Civilian targeting	716	Southern Africa	Zimbabwe	Matabeleland South	Plumtree		Plumtree	-20.4833	27.8167	1	Zimbabwe Human Rights NGO Forum	Other	ZimRights member
ZIM299	2000-05-14	2000	1	Political violence	Violence against civilians	Abduction/forced disappearance	ZANU-PF: Zimbabwe African National Union-Patriotic Front		Political militia	Civilians (Zimbabwe)		Civilians	Political militia-Civilians	Civilian targeting	716	Southern Africa	Zimbabwe	Bulawayo	Bulawayo		Bulawayo	-20.15	28.58	1	Zimbabwe Human Rights NGO Forum	Other	2 MDC supporters abducted
ZIM300	2000-05-14	2000	1	Political violence	Violence against civilians	Attack	ZANU-PF: Zimbabwe African National Union-Patriotic Front		Political militia	Civilians (Zimbabwe)		Civilians	Political militia-Civilians	Civilian targeting	716	Southern Africa	Zimbabwe	Midlands	Mberengwa		Mberengwa	-20.4833	29.9167	1	Zimbabwe Human Rights NGO Forum	Other	On 14 May 2000
ZIM305	2000-05-15	2000	1	Political violence	Violence against civilians	Abduction/forced disappearance	ZANU-PF: Zimbabwe African National Union-Patriotic Front		Political militia	Civilians (Zimbabwe)	Health Workers (Zimbabwe)	Civilians	Political militia-Civilians	Civilian targeting	716	Southern Africa	Zimbabwe	Midlands	Mberengwa		Mnene	-20.6166	30.05	1	Zimbabwe Human Rights NGO Forum	Other	3 nurses abducted and assaulted - accused of MDC sympathies	0		1618597778
ZIM304	2000-05-15	2000	1	Political violence	Violence against civilians	Attack	ZANU-PF: Zimbabwe African National Union-Patriotic Front		Political militia	Civilians (Zimbabwe)	Students (Zimbabwe); Teachers (Zimbabwe)	Civilians	Political militia-Civilians	Civilian targeting	716	Southern Africa	Zimbabwe	Midlands	Mberengwa		Mberengwa	-20.4833	29.9167	1	Zimbabwe Human Rights NGO Forum	Other	Schoolhouse attacked
ZIM302	2000-05-15	2000	1	Strategic developments	Strategic developments	Looting/property destruction	ZANU-PF: Zimbabwe African National Union-Patriotic Front		Political militia	Civilians (Zimbabwe)	MDC: Movement for Democratic Change	Civilians	Political militia-Civilians		716	Southern Africa	Zimbabwe	Midlands	Kwekwe Urban		Kwekwe	-18.9166	29.8167	1	Amnesty International	Other	Property destruction: On 15 May 2000
ZIM303	2000-05-15	2000	1	Political violence	Violence against civilians	Attack	ZANU-PF: Zimbabwe African National Union-Patriotic Front		Political militia	Civilians (Zimbabwe)		Civilians	Political militia-Civilians	Civilian targeting	716	Southern Africa	Zimbabwe	Midlands	Mberengwa		Mberengwa	-20.4833	29.9167	1	Zimbabwe Human Rights NGO Forum	Other	On 15 May 2000
ZIM308	2000-05-16	2000	1	Political violence	Violence against civilians	Sexual violence	ZANU-PF: Zimbabwe African National Union-Patriotic Front		Political militia	Civilians (Zimbabwe)	Women (Zimbabwe)	Civilians	Political militia-Civilians	Civilian targeting	716	Southern Africa	Zimbabwe	Mashonaland Central	Mvurwi		Mvurwi	-17.0333	30.85	2	Zimbabwe Human Rights NGO Forum	Other	7 women beaten and sexual favours demanded from them	0		1618597778
ZIM310	2000-05-16	2000	1	Political violence	Violence against civilians	Attack	ZNLWVA: Zimbabwe National Liberation War Veterans Association		Political militia	Civilians (Zimbabwe)		Civilians	Political militia-Civilians	Civilian targeting	716	Southern Africa	Zimbabwe	Matabeleland North	Umguza		Ntabazinduna	-20.0166	28.85	1	Zimbabwe Human Rights NGO Forum	Other	War vets terrorise area for day	0		1618597778
ZIM309	2000-05-16	2000	1	Political violence	Violence against civilians	Attack	ZNLWVA: Zimbabwe National Liberation War Veterans Association		Political militia	Civilians (Zimbabwe)		Civilians	Political militia-Civilians	Civilian targeting	716	Southern Africa	Zimbabwe	Harare	Harare Urban		Harare	-17.8277	31.0534	1	Zimbabwe Human Rights NGO Forum	Other	MDC chairpersons house set alight	0		1618597778
ZIM311	2000-05-17	2000	1	Political violence	Violence against civilians	Attack	ZANU-PF: Zimbabwe African National Union-Patriotic Front	ZNLWVA: Zimbabwe National Liberation War Veterans Association	Political militia	Civilians (Zimbabwe)		Civilians	Political militia-Civilians	Civilian targeting	716	Southern Africa	Zimbabwe	Harare	Harare Urban		Harare	-17.8277	31.0534	1	Amnesty International	Other	Victim killed in attempted escape from surgery used as torture base by Chenjerai Hunzvi	1		1618597778
ZIM312	2000-05-17	2000	1	Political violence	Violence against civilians	Attack	Unidentified Armed Group (Zimbabwe)		Political militia	Civilians (Zimbabwe)		Civilians	Political militia-Civilians	Civilian targeting	716	Southern Africa	Zimbabwe	Midlands	Mberengwa		Mberengwa	-20.4833	29.9167	1	Zimbabwe Human Rights NGO Forum	Other	Perpetrators probably Zanu-PF but unspecified in report	0		1618597778
ZIM313	2000-05-17	2000	1	Political violence	Violence against civilians	Attack	ZANU-PF: Zimbabwe African National Union-Patriotic Front		Political militia	Civilians (Zimbabwe)		Civilians	Political militia-Civilians	Civilian targeting	716	Southern Africa	Zimbabwe	Mashonaland East	Mudzi		Mudzi	-17.1333	32.6666	1	Zimbabwe Human Rights NGO Forum	Other	Village headman and UP supporter Mationa Mashaya beaten to death
ZIM314	2000-05-17	2000	1	Political violence	Violence against civilians	Attack	ZNLWVA: Zimbabwe National Liberation War Veterans Association		Political militia	Civilians (Zimbabwe)		Civilians	Political militia-Civilians	Civilian targeting	716	Southern Africa	Zimbabwe	Matabeleland South	Matobo		Kezi	-20.9166	28.4667	1	Zimbabwe Human Rights NGO Forum	Other	On 17 May 2000
ZIM315	2000-05-18	2000	1	Political violence	Violence against civilians	Sexual violence	ZANU-PF: Zimbabwe African National Union-Patriotic Front	ZNLWVA: Zimbabwe National Liberation War Veterans Association	Political militia	Civilians (Zimbabwe)	Teachers (Zimbabwe)	Civilians	Political militia-Civilians	Civilian targeting	716	Southern Africa	Zimbabwe	Manicaland	Chimanimani		Chimanimani	-19.8	32.8667	1	Zimbabwe Human Rights NGO Forum	Other	Date is report release date.Primary and secondary schools taken over
ZIM317	2000-05-18	2000	1	Political violence	Violence against civilians	Attack	ZANU-PF: Zimbabwe African National Union-Patriotic Front		Political militia	Civilians (Zimbabwe)		Civilians	Political militia-Civilians	Civilian targeting	716	Southern Africa	Zimbabwe	Matabeleland South	Plumtree		Plumtree	-20.4833	27.8167	1	Zimbabwe Human Rights NGO Forum	Other	Villagers attending MDC rally attacked	0		1618597778
ZIM318	2000-05-18	2000	1	Political violence	Riots	Mob violence	Rioters (Zimbabwe)		Rioters	Civilians (Zimbabwe)		Civilians	Rioters-Civilians	Civilian targeting	716	Southern Africa	Zimbabwe	Mashonaland Central	Mazowe		Mazowe	-17.5166	30.9667	1	Zimbabwe Human Rights NGO Forum	Other	Series of beatings	0		1618597778
ZIM316	2000-05-18	2000	1	Political violence	Violence against civilians	Attack	ZANU-PF: Zimbabwe African National Union-Patriotic Front		Political militia	Civilians (Zimbabwe)		Civilians	Political militia-Civilians	Civilian targeting	716	Southern Africa	Zimbabwe	Mashonaland West	Hurungwe		Hurungwe	-17	29.3333	1	Zimbabwe Human Rights NGO Forum	Other	On 18 May 2000
ZIM320	2000-05-19	2000	1	Political violence	Violence against civilians	Attack	Unidentified Armed Group (Zimbabwe)		Political militia	Civilians (Zimbabwe)	Women (Zimbabwe)	Civilians	Political militia-Civilians	Civilian targeting	716	Southern Africa	Zimbabwe	Harare	Harare Urban		Harare	-17.8277	31.0534	1	Zimbabwe Human Rights NGO Forum	Other	White girl attacked
ZIM323	2000-05-20	2000	1	Political violence	Violence against civilians	Sexual violence	ZANU-PF: Zimbabwe African National Union-Patriotic Front		Political militia	Civilians (Zimbabwe)	Health Workers (Zimbabwe)	Civilians	Political militia-Civilians	Civilian targeting	716	Southern Africa	Zimbabwe	Mashonaland East	Uzumba-Maramba-Pfungwe		Nyadiri	-17.4166	32.0167	1	Zimbabwe Human Rights NGO Forum	Other	Nyadiri hospital raided
ZIM321	2000-05-20	2000	1	Political violence	Violence against civilians	Attack	MDC: Movement for Democratic Change		Political militia	Civilians (Zimbabwe)		Civilians	Political militia-Civilians	Civilian targeting	716	Southern Africa	Zimbabwe	Harare	Harare Urban		Mabvuku	-17.85	31.1833	1	Zimbabwe Human Rights NGO Forum	Other	On 20 May 2000
ZIM322	2000-05-20	2000	1	Political violence	Violence against civilians	Attack	Unidentified Armed Group (Zimbabwe)		Political militia	Civilians (Zimbabwe)		Civilians	Political militia-Civilians	Civilian targeting	716	Southern Africa	Zimbabwe	Matabeleland South	Plumtree		Plumtree	-20.4833	27.8167	1	Zimbabwe Human Rights NGO Forum	Other	On 20 May 2000
ZIM325	2000-05-21	2000	1	Political violence	Violence against civilians	Attack	MDC: Movement for Democratic Change		Political militia	Civilians (Zimbabwe)		Civilians	Political militia-Civilians	Civilian targeting	716	Southern Africa	Zimbabwe	Harare	Harare Urban		Mabvuku	-17.85	31.1833	1	Zimbabwe Human Rights NGO Forum	Other	MDC candidate Justin Mutendazamera implicated in beating	0		1618597778
ZIM327	2000-05-21	2000	1	Political violence	Violence against civilians	Sexual violence	ZANU-PF: Zimbabwe African National Union-Patriotic Front		Political militia	Civilians (Zimbabwe)	Women (Zimbabwe); Students (Zimbabwe)	Civilians	Political militia-Civilians	Civilian targeting	716	Southern Africa	Zimbabwe	Mashonaland East	Murehwa		Murehwa	-17.6469	31.7775	1	Zimbabwe Human Rights NGO Forum	Other	3 schoolgirls raped by Zanu-PF	0	women targeted: girls	1638981224
ZIM324	2000-05-21	2000	1	Political violence	Violence against civilians	Attack	Police Forces of Zimbabwe (1987-2017)		State forces	Civilians (Zimbabwe)		Civilians	State forces-Civilians	Civilian targeting	716	Southern Africa	Zimbabwe	Harare	Harare Urban		Mabvuku	-17.85	31.1833	1	Zimbabwe Human Rights NGO Forum	Other	On 21 May 2000
ZIM328	2000-05-21	2000	1	Political violence	Violence against civilians	Attack	ZANU-PF: Zimbabwe African National Union-Patriotic Front		Political militia	Civilians (Zimbabwe)		Civilians	Political militia-Civilians	Civilian targeting	716	Southern Africa	Zimbabwe	Mashonaland West	Zvimba		Zvimba	-17.75	30.1667	1	Zimbabwe Human Rights NGO Forum	Other	On 21 May 2000
ZIM326	2000-05-21	2000	1	Political violence	Violence against civilians	Attack	ZANU-PF: Zimbabwe African National Union-Patriotic Front		Political militia	Civilians (Zimbabwe)		Civilians	Political militia-Civilians	Civilian targeting	716	Southern Africa	Zimbabwe	Midlands	Mberengwa		Mberengwa	-20.4833	29.9167	1	Zimbabwe Human Rights NGO Forum	Other	On 21 May 2000
ZIM330	2000-05-22	2000	1	Political violence	Violence against civilians	Attack	ZANU-PF: Zimbabwe African National Union-Patriotic Front		Political militia	Civilians (Zimbabwe)	Teachers (Zimbabwe)	Civilians	Political militia-Civilians	Civilian targeting	716	Southern Africa	Zimbabwe	Mashonaland East	Marondera Urban		Marondera	-18.1833	31.55	1	Zimbabwe Human Rights NGO Forum	Other	2 teachers assaulted as Zanu-PF supporters attempted to force people to attend rally	0		1618597778
ZIM331	2000-05-23	2000	1	Political violence	Violence against civilians	Attack	ZANU-PF: Zimbabwe African National Union-Patriotic Front		Political militia	Civilians (Zimbabwe)		Civilians	Political militia-Civilians	Civilian targeting	716	Southern Africa	Zimbabwe	Midlands	Mberengwa		Mberengwa	-20.4833	29.9167	1	Zimbabwe Human Rights NGO Forum	Other	On 23 May 2000
ZIM333	2000-05-24	2000	1	Political violence	Violence against civilians	Attack	ZANU-PF: Zimbabwe African National Union-Patriotic Front	Police Forces of Zimbabwe (1987-2017)	Political militia	Civilians (Zimbabwe)		Civilians	Political militia-Civilians	Civilian targeting	716	Southern Africa	Zimbabwe	Midlands	Mberengwa		Mataga	-20.85	30.2	1	Zimbabwe Human Rights NGO Forum	Other	Police watched at a distance as victim was brutally beaten	0		1618597778
ZIM335	2000-05-24	2000	1	Political violence	Violence against civilians	Attack	ZANU-PF: Zimbabwe African National Union-Patriotic Front	ZNLWVA: Zimbabwe National Liberation War Veterans Association	Political militia	Civilians (Zimbabwe)	Women (Zimbabwe)	Civilians	Political militia-Civilians	Civilian targeting	716	Southern Africa	Zimbabwe	Midlands	Mberengwa		Mberengwa	-20.4833	29.9167	1	Zimbabwe Human Rights NGO Forum	Other	Victim was 9 month pregnant at time of assault	0		1618597778
ZIM336	2000-05-24	2000	1	Political violence	Violence against civilians	Attack	ZANU-PF: Zimbabwe African National Union-Patriotic Front		Political militia	Civilians (Zimbabwe)		Civilians	Political militia-Civilians	Civilian targeting	716	Southern Africa	Zimbabwe	Midlands	Mberengwa		Mberengwa	-20.4833	29.9167	1	Zimbabwe Human Rights NGO Forum	Other	Zanu-PF supporter beaten for not attending a rally	0		1618597778
ZIM334	2000-05-24	2000	1	Political violence	Violence against civilians	Attack	ZANU-PF: Zimbabwe African National Union-Patriotic Front		Political militia	Civilians (Zimbabwe)		Civilians	Political militia-Civilians	Civilian targeting	716	Southern Africa	Zimbabwe	Midlands	Mberengwa		Mberengwa	-20.4833	29.9167	1	Zimbabwe Human Rights NGO Forum	Other	MDC supporters abducted
ZIM332	2000-05-24	2000	1	Political violence	Violence against civilians	Attack	MDC: Movement for Democratic Change	ZNLWVA: Zimbabwe National Liberation War Veterans Association	Political militia	Civilians (Zimbabwe)		Civilians	Political militia-Civilians	Civilian targeting	716	Southern Africa	Zimbabwe	Midlands	Mberengwa		Mataga	-20.85	30.2	1	Zimbabwe Human Rights NGO Forum	Other	On 24 May 2000
ZIM338	2000-05-25	2000	1	Political violence	Violence against civilians	Attack	ZANU-PF: Zimbabwe African National Union-Patriotic Front		Political militia	Civilians (Zimbabwe)		Civilians	Political militia-Civilians	Civilian targeting	716	Southern Africa	Zimbabwe	Bulawayo	Bulawayo		Bulawayo	-20.15	28.58	1	Zimbabwe Human Rights NGO Forum	Other	On 25 May 2000
ZIM339	2000-05-25	2000	1	Political violence	Violence against civilians	Attack	ZANU-PF: Zimbabwe African National Union-Patriotic Front		Political militia	Civilians (Zimbabwe)		Civilians	Political militia-Civilians	Civilian targeting	716	Southern Africa	Zimbabwe	Midlands	Mberengwa		Mataga	-20.85	30.2	1	Zimbabwe Human Rights NGO Forum	Other	On 25 May 2000
ZIM337	2000-05-25	2000	1	Political violence	Violence against civilians	Attack	MDC: Movement for Democratic Change		Political militia	Civilians (Zimbabwe)		Civilians	Political militia-Civilians	Civilian targeting	716	Southern Africa	Zimbabwe	Midlands	Mberengwa		Mataga	-20.85	30.2	1	Zimbabwe Human Rights NGO Forum	Other	On 25 May 2000
ZIM340	2000-05-25	2000	1	Political violence	Violence against civilians	Attack	ZANU-PF: Zimbabwe African National Union-Patriotic Front		Political militia	Civilians (Zimbabwe)		Civilians	Political militia-Civilians	Civilian targeting	716	Southern Africa	Zimbabwe	Midlands	Mberengwa		Mberengwa	-20.4833	29.9167	1	Zimbabwe Human Rights NGO Forum	Other	On 25 May 2000
ZIM342	2000-05-26	2000	1	Political violence	Violence against civilians	Attack	ZANU-PF: Zimbabwe African National Union-Patriotic Front		Political militia	Civilians (Zimbabwe)		Civilians	Political militia-Civilians	Civilian targeting	716	Southern Africa	Zimbabwe	Harare	Harare Urban		Harare	-17.8277	31.0534	1	Zimbabwe Human Rights NGO Forum	Other	Zanu-PF supporters attack supporters of Independent candidate	0		1618597778
ZIM341	2000-05-26	2000	1	Political violence	Riots	Mob violence	Rioters (Zimbabwe)	ZANU-PF: Zimbabwe African National Union-Patriotic Front	Rioters	Police Forces of Zimbabwe (1987-2017)		State forces	State forces-Rioters		716	Southern Africa	Zimbabwe	Mashonaland Central	Mvurwi		Mvurwi	-17.0333	30.85	1	Zimbabwe Human Rights NGO Forum	Other	Zanu-PF led by Border Gezi storm police station after unsuccessfully attempting to secure release of arrested Zanu-PF supporters	0		1618597778
ZIM343	2000-05-27	2000	1	Political violence	Violence against civilians	Attack	ZANU-PF: Zimbabwe African National Union-Patriotic Front		Political militia	Civilians (Zimbabwe)		Civilians	Political militia-Civilians	Civilian targeting	716	Southern Africa	Zimbabwe	Midlands	Mberengwa		Mataga	-20.85	30.2	1	Zimbabwe Human Rights NGO Forum	Other	On 27 May 2000
ZIM346	2000-05-28	2000	1	Political violence	Violence against civilians	Attack	ZNLWVA: Zimbabwe National Liberation War Veterans Association	Military Forces of Zimbabwe (1987-2017) Central Intelligence Organization	Political militia	Civilians (Zimbabwe)		Civilians	Political militia-Civilians	Civilian targeting	716	Southern Africa	Zimbabwe	Midlands	Mberengwa		Mberengwa	-20.4833	29.9167	1	Zimbabwe Human Rights NGO Forum	Other	MDC supporters rounded up
ZIM345	2000-05-28	2000	1	Political violence	Violence against civilians	Attack	ZANU-PF: Zimbabwe African National Union-Patriotic Front	Police Forces of Zimbabwe (1987-2017)	Political militia	Civilians (Zimbabwe)		Civilians	Political militia-Civilians	Civilian targeting	716	Southern Africa	Zimbabwe	Midlands	Mberengwa		Mataga	-20.85	30.2	1	Zimbabwe Human Rights NGO Forum	Other	On 28 May 2000
ZIM347	2000-05-29	2000	1	Political violence	Violence against civilians	Attack	MDC: Movement for Democratic Change		Political militia	Civilians (Zimbabwe)		Civilians	Political militia-Civilians	Civilian targeting	716	Southern Africa	Zimbabwe	Midlands	Mberengwa		Mataga	-20.85	30.2	1	Zimbabwe Human Rights NGO Forum	Other	On 29 May 2000
ZIM349	2000-05-30	2000	1	Political violence	Violence against civilians	Attack	ZANU-PF: Zimbabwe African National Union-Patriotic Front		Political militia	Civilians (Zimbabwe)		Civilians	Political militia-Civilians	Civilian targeting	716	Southern Africa	Zimbabwe	Midlands	Mberengwa		Mataga	-20.85	30.2	1	Zimbabwe Human Rights NGO Forum	Other	MDC youth secretary attacked	0		1618597778
ZIM348	2000-05-30	2000	1	Political violence	Violence against civilians	Attack	MDC: Movement for Democratic Change		Political militia	Civilians (Zimbabwe)		Civilians	Political militia-Civilians	Civilian targeting	716	Southern Africa	Zimbabwe	Midlands	Mberengwa		Mataga	-20.85	30.2	1	Zimbabwe Human Rights NGO Forum	Other	On 30 May 2000
ZIM352	2000-05-31	2000	1	Political violence	Violence against civilians	Attack	ZNLWVA: Zimbabwe National Liberation War Veterans Association		Political militia	Civilians (Zimbabwe)		Civilians	Political militia-Civilians	Civilian targeting	716	Southern Africa	Zimbabwe	Bulawayo	Bulawayo		Bulawayo	-20.15	28.58	1	Zimbabwe Human Rights NGO Forum	Other	Zanu-PF chairman for BulawayoEdson Ncube
ZIM350	2000-05-31	2000	1	Strategic developments	Strategic developments	Looting/property destruction	ZANU-PF: Zimbabwe African National Union-Patriotic Front		Political militia				Political militia only		716	Southern Africa	Zimbabwe	Midlands	Mberengwa		Mataga	-20.85	30.2	1	Zimbabwe Human Rights NGO Forum	Other	Property destruction: Shop belonging to MDC chairperson burned	0		1618597778
ZIM351	2000-05-31	2000	1	Political violence	Violence against civilians	Attack	ZANU-PF: Zimbabwe African National Union-Patriotic Front		Political militia	Civilians (Zimbabwe)		Civilians	Political militia-Civilians	Civilian targeting	716	Southern Africa	Zimbabwe	Midlands	Mberengwa		Mberengwa	-20.4833	29.9167	1	Zimbabwe Human Rights NGO Forum	Other	On 31 May 2000
ZIM357	2000-06-01	2000	1	Political violence	Violence against civilians	Attack	ZANU-PF: Zimbabwe African National Union-Patriotic Front		Political militia	Civilians (Zimbabwe)		Civilians	Political militia-Civilians	Civilian targeting	716	Southern Africa	Zimbabwe	Masvingo	Bikita		Bikita	-20.0833	31.6167	1	Zimbabwe Human Rights NGO Forum	Other	Thadeus Runkuni
ZIM358	2000-06-01	2000	1	Political violence	Violence against civilians	Abduction/forced disappearance	ZANU-PF: Zimbabwe African National Union-Patriotic Front	ZNLWVA: Zimbabwe National Liberation War Veterans Association	Political militia	Civilians (Zimbabwe)		Civilians	Political militia-Civilians	Civilian targeting	716	Southern Africa	Zimbabwe	Bulawayo	Bulawayo		Bulawayo	-20.15	28.58	1	Zimbabwe Human Rights NGO Forum	Other	2 MDC supporters abducted
ZIM359	2000-06-01	2000	1	Political violence	Violence against civilians	Attack	ZANU-PF: Zimbabwe African National Union-Patriotic Front		Political militia	Civilians (Zimbabwe)		Civilians	Political militia-Civilians	Civilian targeting	716	Southern Africa	Zimbabwe	Harare	Harare Rural		Derbyshire	-17.9433	31.0261	1	Zimbabwe Human Rights NGO Forum	Other	MDC campaigners attacked	0		1618597778
ZIM355	2000-06-01	2000	1	Political violence	Violence against civilians	Attack	Police Forces of Zimbabwe (1987-2017)	Military Forces of Zimbabwe (1987-2017)	State forces	Civilians (Zimbabwe)		Civilians	State forces-Civilians	Civilian targeting	716	Southern Africa	Zimbabwe	Harare	Harare Urban		Mabvuku	-17.85	31.1833	1	Zimbabwe Human Rights NGO Forum	Other	Post-election violence. Police/army enter a bar looking for people who voted MDC and beat up patrons	0		1618597778
ZIM362	2000-06-01	2000	1	Political violence	Violence against civilians	Attack	ZNLWVA: Zimbabwe National Liberation War Veterans Association		Political militia	Civilians (Zimbabwe)	Teachers (Zimbabwe)	Civilians	Political militia-Civilians	Civilian targeting	716	Southern Africa	Zimbabwe	Midlands	Mberengwa		Mberengwa	-20.4833	29.9167	1	Zimbabwe Human Rights NGO Forum	Other	War vets forced some teachers to go victimise another	0		1618597778
ZIM361	2000-06-01	2000	1	Political violence	Violence against civilians	Attack	ZNLWVA: Zimbabwe National Liberation War Veterans Association		Political militia	Civilians (Zimbabwe)	Teachers (Zimbabwe)	Civilians	Political militia-Civilians	Civilian targeting	716	Southern Africa	Zimbabwe	Midlands	Mberengwa		Mberengwa	-20.4833	29.9167	1	Zimbabwe Human Rights NGO Forum	Other	Maringambizi school library burned
ZIM354	2000-06-01	2000	1	Political violence	Violence against civilians	Attack	Police Forces of Zimbabwe (1987-2017)		State forces	Civilians (Zimbabwe)		Civilians	State forces-Civilians	Civilian targeting	716	Southern Africa	Zimbabwe	Harare	Harare Urban		Mabvuku	-17.85	31.1833	1	Zimbabwe Human Rights NGO Forum	Other	Post-election violence. Police enter a bar looking for people who voted MDC and beat up patrons	0		1618597778
ZIM360	2000-06-01	2000	1	Political violence	Violence against civilians	Sexual violence	ZANU-PF: Zimbabwe African National Union-Patriotic Front		Political militia	Civilians (Zimbabwe)	Women (Zimbabwe)	Civilians	Political militia-Civilians	Civilian targeting	716	Southern Africa	Zimbabwe	Mashonaland East	Murehwa		St. Pauls Mission	-17.75	31.5833	1	Zimbabwe Human Rights NGO Forum	Other	16 year old girl gang raped
ZIM353	2000-06-01	2000	1	Political violence	Violence against civilians	Abduction/forced disappearance	ZANU-PF: Zimbabwe African National Union-Patriotic Front		Political militia	Civilians (Zimbabwe)	Women (Zimbabwe)	Civilians	Political militia-Civilians	Civilian targeting	716	Southern Africa	Zimbabwe	Matabeleland North	Tsholotsho		Mbizo	-19.2166	27.5167	1	Amnesty International	Other	Woman abducted
ZIM356	2000-06-01	2000	1	Political violence	Violence against civilians	Attack	ZANU-PF: Zimbabwe African National Union-Patriotic Front		Political militia	Civilians (Zimbabwe)		Civilians	Political militia-Civilians	Civilian targeting	716	Southern Africa	Zimbabwe	Masvingo	Bikita		Bikita	-20.0833	31.6167	1	Zimbabwe Human Rights NGO Forum	Other	On 1 June 2000
ZIM365	2000-06-02	2000	1	Political violence	Violence against civilians	Attack	ZNLWVA: Zimbabwe National Liberation War Veterans Association		Political militia	Civilians (Zimbabwe)		Civilians	Political militia-Civilians	Civilian targeting	716	Southern Africa	Zimbabwe	Manicaland	Buhera		Birchenough Bridge	-19.9333	32.3167	1	Zimbabwe Human Rights NGO Forum	Other	Invasion of Devure Ranch	0		1618597778
ZIM364	2000-06-02	2000	1	Political violence	Violence against civilians	Attack	MDC: Movement for Democratic Change		Political militia	Civilians (Zimbabwe)		Civilians	Political militia-Civilians	Civilian targeting	716	Southern Africa	Zimbabwe	Harare	Harare Urban		Harare	-17.8277	31.0534	1	Zimbabwe Human Rights NGO Forum	Other	On 2 June 2000
ZIM363	2000-06-02	2000	1	Demonstrations	Riots	Violent demonstration	Rioters (Zimbabwe)	MDC: Movement for Democratic Change	Rioters	Rioters (Zimbabwe)	ZANU-PF: Zimbabwe African National Union-Patriotic Front	Rioters	Rioters-Rioters		716	Southern Africa	Zimbabwe	Midlands	Mberengwa		Mataga	-20.85	30.2	1	Zimbabwe Human Rights NGO Forum	Other	On 2 June 2000
ZIM370	2000-06-03	2000	1	Political violence	Violence against civilians	Attack	Unidentified Armed Group (Zimbabwe)		Political militia	Civilians (Zimbabwe)		Civilians	Political militia-Civilians	Civilian targeting	716	Southern Africa	Zimbabwe	Manicaland	Mutasa		Mutasa	-18.75	32.6333	1	Zimbabwe Human Rights NGO Forum	Other	Perpetrators most likely Zanu-PF. Houses and shops belonging to (suspected) MDC supporters burned	0		1618597778
ZIM368	2000-06-03	2000	1	Political violence	Violence against civilians	Attack	Unidentified Armed Group (Zimbabwe)		Political militia	Civilians (Zimbabwe)		Civilians	Political militia-Civilians	Civilian targeting	716	Southern Africa	Zimbabwe	Matabeleland North	Bubi		Inyati	-19.6756	28.8469	2	Zimbabwe Human Rights NGO Forum	Other	Independent candidate Mr. M.H. Ncubes shop burned	0		1618597778
ZIM367	2000-06-03	2000	1	Political violence	Violence against civilians	Attack	MDC: Movement for Democratic Change		Political militia	Civilians (Zimbabwe)		Civilians	Political militia-Civilians	Civilian targeting	716	Southern Africa	Zimbabwe	Midlands	Mberengwa		Mataga	-20.85	30.2	1	Zimbabwe Human Rights NGO Forum	Other	House and granary burned	0		1618597778
ZIM372	2000-06-03	2000	1	Political violence	Violence against civilians	Attack	ZNLWVA: Zimbabwe National Liberation War Veterans Association	ZANU-PF: Zimbabwe African National Union-Patriotic Front	Political militia	Civilians (Zimbabwe)		Civilians	Political militia-Civilians	Civilian targeting	716	Southern Africa	Zimbabwe	Midlands	Mberengwa		Mataga	-20.85	30.2	1	Zimbabwe Human Rights NGO Forum	Other	Police watched while MDC supporters tortured	0		1618597778
ZIM369	2000-06-03	2000	1	Political violence	Violence against civilians	Attack	Unidentified Armed Group (Zimbabwe)		Political militia	Civilians (Zimbabwe)		Civilians	Political militia-Civilians	Civilian targeting	716	Southern Africa	Zimbabwe	Mashonaland West	Kadoma Urban		Kadoma	-18.35	29.9167	1	Zimbabwe Human Rights NGO Forum	Other	Petrol bombs (unexploded)thrown at 2 suspected MDC supporters houses	0		1618597778
ZIM366	2000-06-03	2000	1	Strategic developments	Strategic developments	Looting/property destruction	ZANU-PF: Zimbabwe African National Union-Patriotic Front		Political militia				Political militia only		716	Southern Africa	Zimbabwe	Midlands	Mberengwa		Mataga	-20.85	30.2	1	Zimbabwe Human Rights NGO Forum	Other	Property destruction: DC branch secretarys house burned	0		1618597778
ZIM371	2000-06-03	2000	1	Political violence	Violence against civilians	Sexual violence	ZANU-PF: Zimbabwe African National Union-Patriotic Front	ZNLWVA: Zimbabwe National Liberation War Veterans Association	Political militia	Civilians (Zimbabwe)	Women (Zimbabwe)	Civilians	Political militia-Civilians	Civilian targeting	716	Southern Africa	Zimbabwe	Manicaland	Mutasa		Mutasa	-18.75	32.6333	1	Zimbabwe Human Rights NGO Forum	Other	Wife of MDC official raped and beaten. One of 9 reported by MDC	0	women targeted: relatives of targeted groups or persons	1638981224
ZIM379	2000-06-04	2000	1	Political violence	Violence against civilians	Attack	Unidentified Armed Group (Zimbabwe)		Political militia	Civilians (Zimbabwe)		Civilians	Political militia-Civilians	Civilian targeting	716	Southern Africa	Zimbabwe	Manicaland	Nyanga		Nyanga	-18.2166	32.75	1	Zimbabwe Human Rights NGO Forum	Other	5 presumed MDC supporters beaten (1 5year old girl)
ZIM378	2000-06-04	2000	1	Political violence	Violence against civilians	Attack	Unidentified Armed Group (Zimbabwe)		Political militia	Civilians (Zimbabwe)		Civilians	Political militia-Civilians	Civilian targeting	716	Southern Africa	Zimbabwe	Manicaland	Nyanga		Nyanga	-18.2166	32.75	1	Zimbabwe Human Rights NGO Forum	Other	18 houses belonging to MDC supporters burned	0		1618597778
ZIM374	2000-06-04	2000	1	Political violence	Violence against civilians	Sexual violence	ZANU-PF: Zimbabwe African National Union-Patriotic Front		Political militia	Civilians (Zimbabwe)	Women (Zimbabwe)	Civilians	Political militia-Civilians	Civilian targeting	716	Southern Africa	Zimbabwe	Midlands	Mberengwa		Mberengwa	-20.4833	29.9167	1	Amnesty International	Other	2 women raped	0		1618597778
ZIM380	2000-06-04	2000	1	Political violence	Violence against civilians	Attack	Unidentified Armed Group (Zimbabwe)		Political militia	Civilians (Zimbabwe)		Civilians	Political militia-Civilians	Civilian targeting	716	Southern Africa	Zimbabwe	Manicaland	Mutare Urban		Sakubva	-18.9833	32.6167	1	Zimbabwe Human Rights NGO Forum	Other	Locals beat up Zanu-PF supporters attempting to force them into attending Border Gezi rally	0		1618597778
ZIM375	2000-06-04	2000	1	Political violence	Battles	Armed clash	Unidentified Armed Group (Zimbabwe)		Political militia	ZNLWVA: Zimbabwe National Liberation War Veterans Association		Political militia	Political militia-Political militia		716	Southern Africa	Zimbabwe	Manicaland	Mutare Urban		Mutare	-18.9707	32.6709	1	Zimbabwe Human Rights NGO Forum	Other	Villagers repulse war veterans attempts to invade a farm 3 times	0		1618597778
ZIM373	2000-06-04	2000	1	Political violence	Violence against civilians	Sexual violence	ZANU-PF: Zimbabwe African National Union-Patriotic Front	ZNLWVA: Zimbabwe National Liberation War Veterans Association	Political militia	Civilians (Zimbabwe)	Women (Zimbabwe)	Civilians	Political militia-Civilians	Civilian targeting	716	Southern Africa	Zimbabwe	Midlands	Mberengwa		Mataga	-20.85	30.2	1	Amnesty International	Other	Zhou brothers abducted
ZIM376	2000-06-04	2000	1	Political violence	Violence against civilians	Attack	MDC: Movement for Democratic Change		Political militia	Civilians (Zimbabwe)		Civilians	Political militia-Civilians	Civilian targeting	716	Southern Africa	Zimbabwe	Midlands	Mberengwa		Mataga	-20.85	30.2	1	Zimbabwe Human Rights NGO Forum	Other	On 4 June 2000
ZIM377	2000-06-04	2000	1	Political violence	Violence against civilians	Attack	MDC: Movement for Democratic Change		Political militia	Civilians (Zimbabwe)		Civilians	Political militia-Civilians	Civilian targeting	716	Southern Africa	Zimbabwe	Midlands	Mberengwa		Mberengwa	-20.4833	29.9167	1	Zimbabwe Human Rights NGO Forum	Other	On 4 June 2000
ZIM381	2000-06-04	2000	1	Political violence	Violence against civilians	Attack	ZNLWVA: Zimbabwe National Liberation War Veterans Association		Political militia	Civilians (Zimbabwe)		Civilians	Political militia-Civilians	Civilian targeting	716	Southern Africa	Zimbabwe	Midlands	Mberengwa		Mberengwa	-20.4833	29.9167	1	Zimbabwe Human Rights NGO Forum	Other	On 4 June 2000
ZIM382	2000-06-05	2000	1	Political violence	Violence against civilians	Attack	ZANU-PF: Zimbabwe African National Union-Patriotic Front		Political militia	Civilians (Zimbabwe)		Civilians	Political militia-Civilians	Civilian targeting	716	Southern Africa	Zimbabwe	Mashonaland Central	Mazowe		Mazowe	-17.5166	30.9667	1	Zimbabwe Human Rights NGO Forum	Other	Farm workers attacked for not attending political rally. Children beaten also	0		1618597778
ZIM383	2000-06-09	2000	1	Political violence	Violence against civilians	Attack	MDC: Movement for Democratic Change		Political militia	Civilians (Zimbabwe)		Civilians	Political militia-Civilians	Civilian targeting	716	Southern Africa	Zimbabwe	Midlands	Mberengwa		Mberengwa	-20.4833	29.9167	1	Zimbabwe Human Rights NGO Forum	Other	Zanu-PF supporter stabbed by MDC supporter	1		1618597778
ZIM385	2000-06-09	2000	1	Political violence	Violence against civilians	Attack	ZANU-PF: Zimbabwe African National Union-Patriotic Front		Political militia	Civilians (Zimbabwe)		Civilians	Political militia-Civilians	Civilian targeting	716	Southern Africa	Zimbabwe	Midlands	Mberengwa		Mberengwa	-20.4833	29.9167	1	Zimbabwe Human Rights NGO Forum	Other	Finos Zhau
ZIM384	2000-06-09	2000	1	Political violence	Violence against civilians	Attack	ZANU-PF: Zimbabwe African National Union-Patriotic Front		Political militia	Civilians (Zimbabwe)		Civilians	Political militia-Civilians	Civilian targeting	716	Southern Africa	Zimbabwe	Harare	Harare Urban		Mabvuku	-17.85	31.1833	1	Zimbabwe Human Rights NGO Forum	Other	On 9 June 2000
ZIM386	2000-06-09	2000	1	Political violence	Violence against civilians	Attack	ZANU-PF: Zimbabwe African National Union-Patriotic Front		Political militia	Civilians (Zimbabwe)		Civilians	Political militia-Civilians	Civilian targeting	716	Southern Africa	Zimbabwe	Harare	Harare Urban		Mufakose	-17.8663	30.9272	1	Zimbabwe Human Rights NGO Forum	Other	On 9 June 2000
ZIM387	2000-06-10	2000	1	Political violence	Violence against civilians	Attack	MDC: Movement for Democratic Change		Political militia	Civilians (Zimbabwe)		Civilians	Political militia-Civilians	Civilian targeting	716	Southern Africa	Zimbabwe	Masvingo	Chivi		Chibi	-20.3166	30.5167	1	Zimbabwe Human Rights NGO Forum	Other	Zanu-PF supporter killed after scuffle with MDC supporter	1		1618597778
ZIM389	2000-06-10	2000	1	Political violence	Violence against civilians	Attack	ZANU-PF: Zimbabwe African National Union-Patriotic Front		Political militia	Civilians (Zimbabwe)		Civilians	Political militia-Civilians	Civilian targeting	716	Southern Africa	Zimbabwe	Harare	Harare Urban		Mufakose	-17.8663	30.9272	1	Zimbabwe Human Rights NGO Forum	Other	On 10 June 2000
ZIM388	2000-06-10	2000	1	Political violence	Violence against civilians	Attack	ZANU-PF: Zimbabwe African National Union-Patriotic Front		Political militia	Civilians (Zimbabwe)		Civilians	Political militia-Civilians	Civilian targeting	716	Southern Africa	Zimbabwe	Mashonaland Central	Mazowe		Mazowe	-17.5166	30.9667	1	Zimbabwe Human Rights NGO Forum	Other	On 10 June 2000
ZIM390	2000-06-12	2000	1	Political violence	Violence against civilians	Abduction/forced disappearance	ZANU-PF: Zimbabwe African National Union-Patriotic Front		Political militia	Civilians (Zimbabwe)		Civilians	Political militia-Civilians	Civilian targeting	716	Southern Africa	Zimbabwe	Midlands	Gokwe South Urban		Gokwe	-18.2166	28.9333	1	Zimbabwe Human Rights NGO Forum	Other	ZUD supporters abducted	0		1618597778
ZIM394	2000-06-12	2000	1	Political violence	Violence against civilians	Attack	ZNLWVA: Zimbabwe National Liberation War Veterans Association		Political militia	Civilians (Zimbabwe)		Civilians	Political militia-Civilians	Civilian targeting	716	Southern Africa	Zimbabwe	Mashonaland East	Murehwa		Macheke	-18.15	31.85	1	Zimbabwe Human Rights NGO Forum	Other	2 farmers assaulted
ZIM392	2000-06-12	2000	1	Political violence	Violence against civilians	Attack	ZANU-PF: Zimbabwe African National Union-Patriotic Front		Political militia	Civilians (Zimbabwe)		Civilians	Political militia-Civilians	Civilian targeting	716	Southern Africa	Zimbabwe	Harare	Harare Urban		Kambuzuma	-17.8552	30.9672	1	Zimbabwe Human Rights NGO Forum	Other	Beligent Marova
ZIM393	2000-06-12	2000	1	Political violence	Violence against civilians	Sexual violence	ZANU-PF: Zimbabwe African National Union-Patriotic Front		Political militia	Civilians (Zimbabwe)	Women (Zimbabwe)	Civilians	Political militia-Civilians	Civilian targeting	716	Southern Africa	Zimbabwe	Mashonaland East	Mutoko		Mutoko	-17.4	32.2167	1	Zimbabwe Human Rights NGO Forum	Other	UP official
ZIM391	2000-06-12	2000	1	Political violence	Violence against civilians	Attack	ZANU-PF: Zimbabwe African National Union-Patriotic Front		Political militia	Civilians (Zimbabwe)		Civilians	Political militia-Civilians	Civilian targeting	716	Southern Africa	Zimbabwe	Harare	Harare Urban		Harare	-17.8277	31.0534	1	Zimbabwe Human Rights NGO Forum	Other	On 12 June 2000
ZIM396	2000-06-13	2000	1	Political violence	Violence against civilians	Attack	ZNLWVA: Zimbabwe National Liberation War Veterans Association		Political militia	Civilians (Zimbabwe)		Civilians	Political militia-Civilians	Civilian targeting	716	Southern Africa	Zimbabwe	Mashonaland East	Murehwa		Macheke	-18.15	31.85	1	Zimbabwe Human Rights NGO Forum	Other	2 farmers assaulted
ZIM395	2000-06-13	2000	1	Political violence	Violence against civilians	Attack	ZANU-PF: Zimbabwe African National Union-Patriotic Front		Political militia	Civilians (Zimbabwe)		Civilians	Political militia-Civilians	Civilian targeting	716	Southern Africa	Zimbabwe	Masvingo	Gutu		Mutero Mission	-19.6333	31.4333	1	Zimbabwe Human Rights NGO Forum	Other	On 13 June 2000
ZIM402	2000-06-14	2000	1	Political violence	Violence against civilians	Abduction/forced disappearance	ZANU-PF: Zimbabwe African National Union-Patriotic Front		Political militia	Civilians (Zimbabwe)	Teachers (Zimbabwe)	Civilians	Political militia-Civilians	Civilian targeting	716	Southern Africa	Zimbabwe	Midlands	Mberengwa		Mnene	-20.6166	30.05	1	Zimbabwe Human Rights NGO Forum	Other	Date is report release date.Temporary teacher abducted	0		1618597778
ZIM398	2000-06-14	2000	1	Political violence	Violence against civilians	Attack	ZANU-PF: Zimbabwe African National Union-Patriotic Front		Political militia	Civilians (Zimbabwe)	Teachers (Zimbabwe)	Civilians	Political militia-Civilians	Civilian targeting	716	Southern Africa	Zimbabwe	Mashonaland Central	Guruve		Guruve	-16.6666	30.7	1	Zimbabwe Human Rights NGO Forum	Other	Date is report release date.Teachers in Chimfombo Primary School
ZIM400	2000-06-14	2000	1	Political violence	Violence against civilians	Attack	ZANU-PF: Zimbabwe African National Union-Patriotic Front		Political militia	Civilians (Zimbabwe)		Civilians	Political militia-Civilians	Civilian targeting	716	Southern Africa	Zimbabwe	Harare	Harare Urban		Harare	-17.8277	31.0534	1	Zimbabwe Human Rights NGO Forum	Other	Zanu-PF supporters attack supporters of Independent candidate Robert Musasiwa	0		1618597778
ZIM397	2000-06-14	2000	1	Political violence	Violence against civilians	Attack	ZANU-PF: Zimbabwe African National Union-Patriotic Front		Political militia	Civilians (Zimbabwe)	Teachers (Zimbabwe)	Civilians	Political militia-Civilians	Civilian targeting	716	Southern Africa	Zimbabwe	Mashonaland East	Goromonzi		Goromonzi	-17.85	31.3833	1	Zimbabwe Human Rights NGO Forum	Other	Date is report release date.Zanu-PF youths attack Mapfeni school
ZIM399	2000-06-14	2000	1	Political violence	Violence against civilians	Attack	ZANU-PF: Zimbabwe African National Union-Patriotic Front		Political militia	Civilians (Zimbabwe)		Civilians	Political militia-Civilians	Civilian targeting	716	Southern Africa	Zimbabwe	Harare	Harare Urban		Harare	-17.8277	31.0534	1	Zimbabwe Human Rights NGO Forum	Other	Zanu-PF supporters attack rally held by Independent candidate Robert Musasiwa	0		1618597778
ZIM401	2000-06-14	2000	1	Political violence	Violence against civilians	Sexual violence	ZANU-PF: Zimbabwe African National Union-Patriotic Front		Political militia	Civilians (Zimbabwe)	Women (Zimbabwe); Teachers (Zimbabwe)	Civilians	Political militia-Civilians	Civilian targeting	716	Southern Africa	Zimbabwe	Masvingo	Masvingo Urban		Masvingo	-20.0833	30.8333	1	Zimbabwe Human Rights NGO Forum	Other	Date is report release date.Teachers in many school of the district targeted
ZIM403	2000-06-15	2000	1	Political violence	Violence against civilians	Attack	MDC: Movement for Democratic Change		Political militia	Civilians (Zimbabwe)		Civilians	Political militia-Civilians	Civilian targeting	716	Southern Africa	Zimbabwe	Masvingo	Chiredzi		Chikombedzi	-21.75	31.3167	1	Zimbabwe Human Rights NGO Forum	Other	Chiredzi South Zanu (PF) candidates house attacked	0		1618597778
ZIM405	2000-06-16	2000	1	Political violence	Violence against civilians	Abduction/forced disappearance	ZANU-PF: Zimbabwe African National Union-Patriotic Front		Political militia	Civilians (Zimbabwe)		Civilians	Political militia-Civilians	Civilian targeting	716	Southern Africa	Zimbabwe	Mashonaland West	Karoi Urban		Karoi	-16.8166	29.6833	1	Zimbabwe Human Rights NGO Forum	Other	10 MDC supporters abducted and taken to Zanu-PF offices	0		1618597778
ZIM404	2000-06-16	2000	1	Political violence	Violence against civilians	Attack	ZANU-PF: Zimbabwe African National Union-Patriotic Front		Political militia	Civilians (Zimbabwe)		Civilians	Political militia-Civilians	Civilian targeting	716	Southern Africa	Zimbabwe	Midlands	Gokwe South Urban		Gokwe	-18.2166	28.9333	1	Zimbabwe Human Rights NGO Forum	Other	Zanu-PF supporter beaten up by other Zanu-PF supporters due to rumours of sons MDC affiliation	0		1618597778
ZIM406	2000-06-16	2000	1	Political violence	Violence against civilians	Attack	ZANU-PF: Zimbabwe African National Union-Patriotic Front		Political militia	Civilians (Zimbabwe)		Civilians	Political militia-Civilians	Civilian targeting	716	Southern Africa	Zimbabwe	Harare	Harare Urban		Mufakose	-17.8663	30.9272	1	Zimbabwe Human Rights NGO Forum	Other	MDC supporter abducted
ZIM411	2000-06-18	2000	1	Political violence	Violence against civilians	Attack	ZANU-PF: Zimbabwe African National Union-Patriotic Front		Political militia	Civilians (Zimbabwe)		Civilians	Political militia-Civilians	Civilian targeting	716	Southern Africa	Zimbabwe	Harare	Harare Urban		Harare	-17.8277	31.0534	1	Zimbabwe Human Rights NGO Forum	Other	Supporter of Independent candidate tortured	0		1618597778
ZIM409	2000-06-18	2000	1	Political violence	Violence against civilians	Attack	ZANU-PF: Zimbabwe African National Union-Patriotic Front		Political militia	Civilians (Zimbabwe)		Civilians	Political militia-Civilians	Civilian targeting	716	Southern Africa	Zimbabwe	Bulawayo	Bulawayo		Bulawayo	-20.15	28.58	1	Zimbabwe Human Rights NGO Forum	Other	Zanu-PF and ZAPU supporters clash	0		1618597778
ZIM407	2000-06-18	2000	1	Political violence	Violence against civilians	Attack	ZANU-PF: Zimbabwe African National Union-Patriotic Front	Police Forces of Zimbabwe (1987-2017)	Political militia	Civilians (Zimbabwe)		Civilians	Political militia-Civilians	Civilian targeting	716	Southern Africa	Zimbabwe	Midlands	Kwekwe Urban		Kwekwe	-18.9166	29.8167	1	Amnesty International	Other	Mandishona Mutyanda
ZIM413	2000-06-18	2000	1	Political violence	Violence against civilians	Abduction/forced disappearance	ZNLWVA: Zimbabwe National Liberation War Veterans Association	ZANU-PF: Zimbabwe African National Union-Patriotic Front	Political militia	Civilians (Zimbabwe)	Students (Zimbabwe)	Civilians	Political militia-Civilians	Civilian targeting	716	Southern Africa	Zimbabwe	Manicaland	Makoni		Makoni	-18.7166	31.9833	1	Zimbabwe Human Rights NGO Forum	Other	School children being abducted from school
ZIM408	2000-06-18	2000	1	Political violence	Violence against civilians	Attack	ZANU-PF: Zimbabwe African National Union-Patriotic Front		Political militia	Civilians (Zimbabwe)	Journalists (Zimbabwe)	Civilians	Political militia-Civilians	Civilian targeting	716	Southern Africa	Zimbabwe	Bulawayo	Bulawayo		Bulawayo	-20.15	28.58	1	Zimbabwe Human Rights NGO Forum	Other	Photographer of Chronicle newspaper assaulted while photographing clash between ZAPU and Zanu-PF	0		1618597778
ZIM412	2000-06-18	2000	1	Political violence	Violence against civilians	Attack	ZANU-PF: Zimbabwe African National Union-Patriotic Front		Political militia	Civilians (Zimbabwe)	Women (Zimbabwe)	Civilians	Political militia-Civilians	Civilian targeting	716	Southern Africa	Zimbabwe	Harare	Harare Urban		Harare	-17.8277	31.0534	1	Zimbabwe Human Rights NGO Forum	Other	ZUD leader Mrs. Margaret Dongo house stoned	0	women targeted: political party supporters	1638981224
ZIM414	2000-06-19	2000	1	Political violence	Violence against civilians	Attack	MDC: Movement for Democratic Change		Political militia	Civilians (Zimbabwe)		Civilians	Political militia-Civilians	Civilian targeting	716	Southern Africa	Zimbabwe	Harare	Harare Urban		Harare	-17.8277	31.0534	1	Zimbabwe Human Rights NGO Forum	Other	Zanu-PF supporters at MDC rally attacked	0		1618597778
ZIM415	2000-06-19	2000	1	Political violence	Violence against civilians	Abduction/forced disappearance	ZANU-PF: Zimbabwe African National Union-Patriotic Front		Political militia	Civilians (Zimbabwe)		Civilians	Political militia-Civilians	Civilian targeting	716	Southern Africa	Zimbabwe	Bulawayo	Bulawayo		Bulawayo	-20.15	28.58	1	Zimbabwe Human Rights NGO Forum	Other	MDC polling agent Patrick Nyabanyama abducted
ZIM417	2000-06-19	2000	1	Political violence	Violence against civilians	Attack	ZNLWVA: Zimbabwe National Liberation War Veterans Association		Political militia	Civilians (Zimbabwe)		Civilians	Political militia-Civilians	Civilian targeting	716	Southern Africa	Zimbabwe	Manicaland	Buhera		Buhera	-19.3333	31.4333	1	Zimbabwe Human Rights NGO Forum	Other	MDC supporters beaten
ZIM416	2000-06-19	2000	1	Political violence	Violence against civilians	Attack	ZANU-PF: Zimbabwe African National Union-Patriotic Front	ZNLWVA: Zimbabwe National Liberation War Veterans Association	Political militia	Civilians (Zimbabwe)		Civilians	Political militia-Civilians	Civilian targeting	716	Southern Africa	Zimbabwe	Masvingo	Chiredzi Urban		Chiredzi	-21.05	31.6667	1	Zimbabwe Human Rights NGO Forum	Other	On 19 June 2000
ZIM427	2000-06-20	2000	1	Strategic developments	Strategic developments	Headquarters or base established	ZANU-PF: Zimbabwe African National Union-Patriotic Front	ZNLWVA: Zimbabwe National Liberation War Veterans Association	Political militia				Political militia only		716	Southern Africa	Zimbabwe	Midlands	Gokwe South Urban		Gokwe	-18.2166	28.9333	1	Zimbabwe Human Rights NGO Forum	Other	Date is report release date
ZIM434	2000-06-20	2000	1	Strategic developments	Strategic developments	Headquarters or base established	ZANU-PF: Zimbabwe African National Union-Patriotic Front	ZNLWVA: Zimbabwe National Liberation War Veterans Association	Political militia				Political militia only		716	Southern Africa	Zimbabwe	Mashonaland Central	Mazowe		Mazowe	-17.5166	30.9667	1	Zimbabwe Human Rights NGO Forum	Other	Date is date report published. Nzvimbo growth point
ZIM421	2000-06-20	2000	1	Strategic developments	Strategic developments	Headquarters or base established	ZANU-PF: Zimbabwe African National Union-Patriotic Front	ZNLWVA: Zimbabwe National Liberation War Veterans Association	Political militia				Political militia only		716	Southern Africa	Zimbabwe	Mashonaland Central	Centenary		Centenary	-16.7299	31.1178	1	Zimbabwe Human Rights NGO Forum	Other	Date is date report published. Farm Health Scheme complex under Zanu(PF) candidate
ZIM447	2000-06-20	2000	1	Strategic developments	Strategic developments	Headquarters or base established	ZANU-PF: Zimbabwe African National Union-Patriotic Front	ZNLWVA: Zimbabwe National Liberation War Veterans Association	Political militia				Political militia only		716	Southern Africa	Zimbabwe	Mashonaland East	Mutoko		Mutoko	-17.4	32.2167	1	Zimbabwe Human Rights NGO Forum	Other	Date is date report published. Nyadire Mission Farm	0		1618597778
[truncated: 6,332 more rows]
